# Supplementary material for: IntegronFinder 2.0: Identification and Analysis of Integrons across Bacteria, with a Focus on Antibiotic Resistance in Klebsiella
Source: MDPI journal article supplement (doi:10.3390/microorganisms10040700), 2022-03-24
Supplement: s1 [file s1]

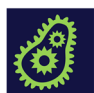

## Supplementary Material

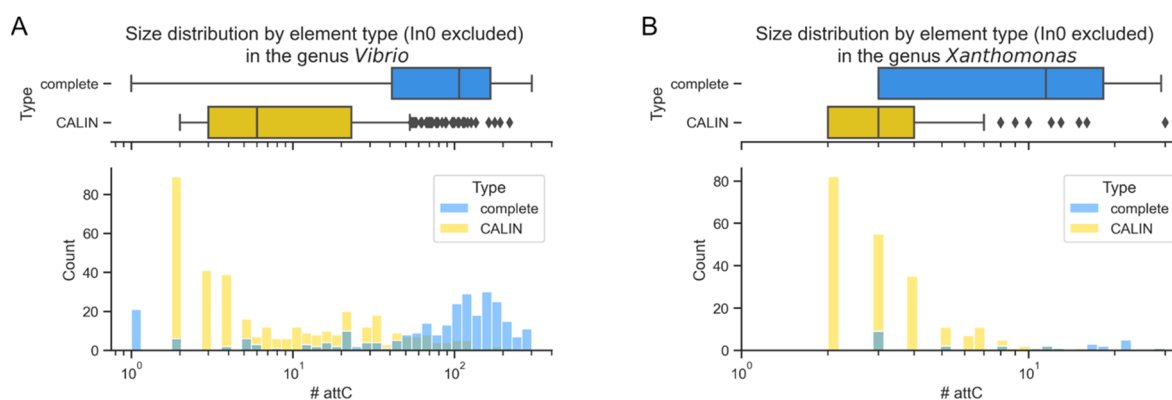

**Figure S1.** Statistics concerning the distribution of integrons in two genera known for harboring sedentary integrons in RefSeq NCBI database. Distribution of the number of *attC* sites found per element (complete integron or CALIN) in *Vibrio* (A) and *Xanthomonas* (B).
