# Supplementary material for: IntegronFinder 2.0: Identification and Analysis of Integrons across Bacteria, with a Focus on Antibiotic Resistance in Klebsiella
Source: Microorganisms. 2022 Mar 24;10(4):700. doi: 10.3390/microorganisms10040700 (PMC9024848; doi:10.3390/microorganisms10040700)
Supplement: Supplementary file 1 [file microorganisms-10-00700-s001.zip]

Archive with 5 entries (5 files):
- microorganisms-1643943-supplementary.pdf
- table_s1.xlsx
- table_s2.xlsx
- table_s3.xlsx
- table_s4.xlsx
