# Supplementary material for: IntegronFinder 2.0: Identification and Analysis of Integrons across Bacteria, with a Focus on Antibiotic Resistance in Klebsiella
Source: Microorganisms. 2022 Mar 24;10(4):700. doi: 10.3390/microorganisms10040700 (PMC9024848; doi:10.3390/microorganisms10040700)
Supplement: Supplementary file 1 [file microorganisms-10-00700-s001.zip › table_s1.xlsx]

## Sheet: Sheet1
isolate_name	assembly_id	name	size	#complete	#CALIN	#In0
ABAL001.0321.00001	GCF_001989575.1	Abyssicoccus albus	1745789	0	0	0
ABDE001.0321.00001	GCF_013267415.1	Abiotrophia defectiva	2046826	0	0	0
ABPH001.0321.00001	GCF_016592595.1	Abyssogena phaseoliformis symbiont OG214	1542177	1	1	0
ACAC001.0321.00001	GCF_001441165.1	Acidipropionibacterium acidipropionici	3651382	0	0	0
ACAC001.0321.00002	GCF_001602115.1	Acidipropionibacterium acidipropionici	3707191	0	0	0
ACAC001.0321.00003	GCF_001855335.1	Acidipropionibacterium acidipropionici	3631890	0	0	0
ACAC001.0321.00004	GCF_001975205.1	Acidipropionibacterium acidipropionici	3645455	0	0	0
ACAC001.0321.00005	GCF_003956085.1	Acidipropionibacterium acidipropionici	3615145	0	0	0
ACAC001.0321.00006	GCF_005890155.1	Acidipropionibacterium acidipropionici	3622795	0	0	0
ACAC001.0321.00007	GCF_000310065.1	Acidipropionibacterium acidipropionici ATCC 4875	3656170	0	0	0
ACAC002.0321.00001	GCF_002005445.1	Acetobacter aceti	3725037	0	0	0
ACAC002.0321.00002	GCF_014218315.1	Acetobacter aceti	3967892	0	0	0
ACAC002.0321.00003	GCF_000193495.2	Acetobacter aceti NBRC 14818	3693126	0	0	0
ACAM001.0321.00001	GCF_009729015.1	Acidianus ambivalens	2252027	0	0	0
ACAR001.0321.00001	GCF_000144695.1	Acetohalobium arabaticum DSM 5501	2469596	0	0	0
ACAS001.0321.00001	GCF_001766235.1	Acetobacter ascendens	2999217	0	0	0
ACAS001.0321.00002	GCF_001766255.1	Acetobacter ascendens	3216032	0	0	0
ACAS001.0321.00003	GCF_002173775.1	Acetobacter ascendens	3285832	0	0	0
ACAV001.0321.00001	GCF_000176855.2	Acidovorax avenae subsp. avenae ATCC 19860	5482170	0	1	0
ACAX001.0321.00001	GCF_900660745.1	Acholeplasma axanthum	1883099	0	0	0
ACBA001.0321.00001	GCF_000046845.1	Acinetobacter baylyi ADP1	3598621	0	0	0
ACBA002.0321.00001	GCF_000695855.3	Acinetobacter baumannii	3935134	0	0	0
ACBA002.0321.00002	GCF_000746605.1	Acinetobacter baumannii	3803317	0	0	0
ACBA002.0321.00003	GCF_000746645.1	Acinetobacter baumannii	4335793	0	0	0
ACBA002.0321.00004	GCF_000761175.1	Acinetobacter baumannii	3875775	0	0	0
ACBA002.0321.00005	GCF_000814345.1	Acinetobacter baumannii	4073976	0	0	0
ACBA002.0321.00006	GCF_000828935.1	Acinetobacter baumannii	4190324	0	1	0
ACBA002.0321.00007	GCF_000830055.1	Acinetobacter baumannii	3917739	1	0	0
ACBA002.0321.00008	GCF_000939415.2	Acinetobacter baumannii	4121620	0	1	0
ACBA002.0321.00009	GCF_000963815.1	Acinetobacter baumannii	4066980	1	1	0
ACBA002.0321.00010	GCF_001026965.1	Acinetobacter baumannii	4199500	0	1	0
ACBA002.0321.00011	GCF_001077555.2	Acinetobacter baumannii	3947826	0	0	0
ACBA002.0321.00012	GCF_001077655.1	Acinetobacter baumannii	4192280	0	0	0
ACBA002.0321.00013	GCF_001077675.1	Acinetobacter baumannii	4006698	0	0	0
ACBA002.0321.00014	GCF_001077965.2	Acinetobacter baumannii	3850058	0	0	0
ACBA002.0321.00015	GCF_001261895.2	Acinetobacter baumannii	3819158	0	0	0
ACBA002.0321.00016	GCF_001399655.1	Acinetobacter baumannii	4131161	0	0	0
ACBA002.0321.00017	GCF_001457535.1	Acinetobacter baumannii	3936255	0	0	0
ACBA002.0321.00018	GCF_001514375.1	Acinetobacter baumannii	4139396	1	1	0
ACBA002.0321.00019	GCF_001517645.1	Acinetobacter baumannii	3947488	0	0	0
ACBA002.0321.00020	GCF_001543995.1	Acinetobacter baumannii	4155251	0	2	0
ACBA002.0321.00021	GCF_001573065.1	Acinetobacter baumannii	3846621	0	0	0
ACBA002.0321.00022	GCF_001573085.1	Acinetobacter baumannii	3977071	0	0	0
ACBA002.0321.00023	GCF_001573105.1	Acinetobacter baumannii	3879636	0	1	0
ACBA002.0321.00024	GCF_001573125.1	Acinetobacter baumannii	3908399	1	1	0
ACBA002.0321.00025	GCF_001578145.1	Acinetobacter baumannii	4172609	0	0	0
ACBA002.0321.00026	GCF_001593425.2	Acinetobacter baumannii	4004792	0	0	0
ACBA002.0321.00027	GCF_001636235.1	Acinetobacter baumannii	4092036	0	0	0
ACBA002.0321.00028	GCF_001668465.2	Acinetobacter baumannii	3885710	0	0	0
ACBA002.0321.00029	GCF_001669145.2	Acinetobacter baumannii	4107868	1	0	0
ACBA002.0321.00030	GCF_001674475.2	Acinetobacter baumannii	4014469	1	0	0
ACBA002.0321.00031	GCF_001674505.2	Acinetobacter baumannii	3943749	1	0	0
ACBA002.0321.00032	GCF_001721705.1	Acinetobacter baumannii	3719282	0	0	0
ACBA002.0321.00033	GCF_001806345.1	Acinetobacter baumannii	4034092	0	0	0
ACBA002.0321.00034	GCF_001806365.1	Acinetobacter baumannii	4086205	0	1	0
ACBA002.0321.00035	GCF_001806385.1	Acinetobacter baumannii	4056960	0	0	0
ACBA002.0321.00036	GCF_001806405.1	Acinetobacter baumannii	4128124	0	1	0
ACBA002.0321.00037	GCF_001806425.1	Acinetobacter baumannii	4038601	0	1	0
ACBA002.0321.00038	GCF_001806445.1	Acinetobacter baumannii	4038715	0	1	0
ACBA002.0321.00039	GCF_001806465.1	Acinetobacter baumannii	4054434	0	1	0
ACBA002.0321.00040	GCF_001806485.1	Acinetobacter baumannii	4075169	0	1	0
ACBA002.0321.00041	GCF_001887305.1	Acinetobacter baumannii	4098585	0	1	0
ACBA002.0321.00042	GCF_001895125.2	Acinetobacter baumannii	4119274	1	0	0
ACBA002.0321.00043	GCF_001895985.1	Acinetobacter baumannii	4093104	0	1	0
ACBA002.0321.00044	GCF_001896005.1	Acinetobacter baumannii	4267631	0	0	0
ACBA002.0321.00045	GCF_001902375.1	Acinetobacter baumannii	4080621	0	1	0
ACBA002.0321.00046	GCF_001908295.1	Acinetobacter baumannii	3988690	0	0	0
ACBA002.0321.00047	GCF_001922205.1	Acinetobacter baumannii	4156005	0	1	0
ACBA002.0321.00048	GCF_001922225.1	Acinetobacter baumannii	4076357	0	1	0
ACBA002.0321.00049	GCF_001922245.1	Acinetobacter baumannii	4174158	0	1	0
ACBA002.0321.00050	GCF_001941765.1	Acinetobacter baumannii	4004719	0	0	0
ACBA002.0321.00051	GCF_002082625.2	Acinetobacter baumannii	4065873	0	1	0
ACBA002.0321.00052	GCF_002082645.1	Acinetobacter baumannii	4108454	0	0	0
ACBA002.0321.00053	GCF_002082685.1	Acinetobacter baumannii	3938733	0	1	0
ACBA002.0321.00054	GCF_002082705.1	Acinetobacter baumannii	4049307	0	1	0
ACBA002.0321.00055	GCF_002082725.1	Acinetobacter baumannii	3987599	0	1	0
ACBA002.0321.00056	GCF_002082745.1	Acinetobacter baumannii	3884414	0	1	0
ACBA002.0321.00057	GCF_002082785.1	Acinetobacter baumannii	4273551	0	1	0
ACBA002.0321.00058	GCF_002082805.1	Acinetobacter baumannii	3870945	0	0	0
ACBA002.0321.00059	GCF_002082825.1	Acinetobacter baumannii	4028479	0	0	0
ACBA002.0321.00060	GCF_002082845.1	Acinetobacter baumannii	3972565	0	1	0
ACBA002.0321.00061	GCF_002082865.1	Acinetobacter baumannii	4064716	0	1	0
ACBA002.0321.00062	GCF_002082885.1	Acinetobacter baumannii	4023177	0	1	0
ACBA002.0321.00063	GCF_002116925.1	Acinetobacter baumannii	3990425	0	0	0
ACBA002.0321.00064	GCF_002210065.1	Acinetobacter baumannii	4144615	1	0	0
ACBA002.0321.00065	GCF_002504145.1	Acinetobacter baumannii	3810701	0	0	0
ACBA002.0321.00066	GCF_002741415.1	Acinetobacter baumannii	4032048	1	0	0
ACBA002.0321.00067	GCF_002753915.1	Acinetobacter baumannii	4147337	0	1	0
ACBA002.0321.00068	GCF_002761575.1	Acinetobacter baumannii	4102702	1	0	0
ACBA002.0321.00069	GCF_002762095.1	Acinetobacter baumannii	3966912	1	0	0
ACBA002.0321.00070	GCF_002762115.1	Acinetobacter baumannii	4000452	1	0	0
ACBA002.0321.00071	GCF_002762155.1	Acinetobacter baumannii	3913931	1	0	0
ACBA002.0321.00072	GCF_002843665.1	Acinetobacter baumannii	4058089	1	1	0
ACBA002.0321.00073	GCF_002902885.1	Acinetobacter baumannii	4078838	0	0	0
ACBA002.0321.00074	GCF_002947415.1	Acinetobacter baumannii	4188385	0	0	0
ACBA002.0321.00075	GCF_002947845.1	Acinetobacter baumannii	4101751	0	0	0
ACBA002.0321.00076	GCF_002948925.1	Acinetobacter baumannii	3871930	1	0	0
ACBA002.0321.00077	GCF_002950495.2	Acinetobacter baumannii	3941678	1	0	0
ACBA002.0321.00078	GCF_002996805.1	Acinetobacter baumannii	4158175	1	3	0
ACBA002.0321.00079	GCF_002999195.2	Acinetobacter baumannii	4140048	1	0	0
ACBA002.0321.00080	GCF_003006035.1	Acinetobacter baumannii	4228300	0	0	0
ACBA002.0321.00081	GCF_003010655.1	Acinetobacter baumannii	4060325	0	1	0
ACBA002.0321.00082	GCF_003010675.1	Acinetobacter baumannii	4249922	0	0	0
ACBA002.0321.00083	GCF_003029495.1	Acinetobacter baumannii	4188380	0	0	0
ACBA002.0321.00084	GCF_003181015.1	Acinetobacter baumannii	4173004	0	0	0
ACBA002.0321.00085	GCF_003264255.1	Acinetobacter baumannii	3979135	0	0	0
ACBA002.0321.00086	GCF_003264275.1	Acinetobacter baumannii	4221037	0	1	0
ACBA002.0321.00087	GCF_003264295.1	Acinetobacter baumannii	3974327	0	0	0
ACBA002.0321.00088	GCF_003288775.1	Acinetobacter baumannii	3920467	0	0	0
ACBA002.0321.00089	GCF_003296225.1	Acinetobacter baumannii	4036816	1	0	0
ACBA002.0321.00090	GCF_003345235.1	Acinetobacter baumannii	4111057	0	0	0
ACBA002.0321.00091	GCF_003431385.1	Acinetobacter baumannii	4342018	0	0	0
ACBA002.0321.00092	GCF_003431865.1	Acinetobacter baumannii	4317303	0	1	0
ACBA002.0321.00093	GCF_003516005.1	Acinetobacter baumannii	4080593	0	1	0
ACBA002.0321.00094	GCF_003522665.1	Acinetobacter baumannii	4128152	0	1	0
ACBA002.0321.00095	GCF_003522705.1	Acinetobacter baumannii	3862444	0	0	0
ACBA002.0321.00096	GCF_003522785.1	Acinetobacter baumannii	4151876	0	1	0
ACBA002.0321.00097	GCF_003522845.1	Acinetobacter baumannii	4066829	0	0	0
ACBA002.0321.00098	GCF_003522885.1	Acinetobacter baumannii	3989947	0	1	0
ACBA002.0321.00099	GCF_003547115.1	Acinetobacter baumannii	4288917	0	1	0
ACBA002.0321.00100	GCF_003591615.1	Acinetobacter baumannii	3891370	0	0	0
ACBA002.0321.00101	GCF_003812065.1	Acinetobacter baumannii	3910272	0	0	0
ACBA002.0321.00102	GCF_003812385.1	Acinetobacter baumannii	3885397	0	1	0
ACBA002.0321.00103	GCF_003812485.1	Acinetobacter baumannii	4250823	0	3	0
ACBA002.0321.00104	GCF_003931755.1	Acinetobacter baumannii	3943275	0	1	0
ACBA002.0321.00105	GCF_003931775.1	Acinetobacter baumannii	3943105	0	1	0
ACBA002.0321.00106	GCF_003948085.2	Acinetobacter baumannii	4104916	0	0	0
ACBA002.0321.00107	GCF_003948455.2	Acinetobacter baumannii	4018858	0	1	0
ACBA002.0321.00108	GCF_003948535.2	Acinetobacter baumannii	3921030	0	0	0
ACBA002.0321.00109	GCF_003949115.2	Acinetobacter baumannii	4099363	0	0	0
ACBA002.0321.00110	GCF_003949595.2	Acinetobacter baumannii	4052320	0	0	0
ACBA002.0321.00111	GCF_003949725.2	Acinetobacter baumannii	4113446	0	0	0
ACBA002.0321.00112	GCF_004028375.1	Acinetobacter baumannii	4023316	0	0	0
ACBA002.0321.00113	GCF_004101685.1	Acinetobacter baumannii	3937511	0	1	0
ACBA002.0321.00114	GCF_004101705.1	Acinetobacter baumannii	3940649	0	1	0
ACBA002.0321.00115	GCF_004101725.1	Acinetobacter baumannii	3934099	0	1	0
ACBA002.0321.00116	GCF_004101745.1	Acinetobacter baumannii	3944921	0	1	0
ACBA002.0321.00117	GCF_004136355.1	Acinetobacter baumannii	4058498	0	1	0
ACBA002.0321.00118	GCF_004194555.1	Acinetobacter baumannii	3885290	0	0	0
ACBA002.0321.00119	GCF_004564095.1	Acinetobacter baumannii	3956226	0	0	0
ACBA002.0321.00120	GCF_004564115.1	Acinetobacter baumannii	3932447	0	0	0
ACBA002.0321.00121	GCF_004758865.1	Acinetobacter baumannii	4172366	0	0	0
ACBA002.0321.00122	GCF_004768705.1	Acinetobacter baumannii	4045550	0	1	0
ACBA002.0321.00124	GCF_005280435.1	Acinetobacter baumannii	4277985	0	1	0
ACBA002.0321.00125	GCF_005280675.1	Acinetobacter baumannii	3796961	0	0	0
ACBA002.0321.00126	GCF_005280695.1	Acinetobacter baumannii	4012118	0	1	0
ACBA002.0321.00127	GCF_005280715.1	Acinetobacter baumannii	4042612	0	2	0
ACBA002.0321.00128	GCF_005518095.1	Acinetobacter baumannii	4366589	0	1	0
ACBA002.0321.00129	GCF_005671375.1	Acinetobacter baumannii	4136467	0	0	0
ACBA002.0321.00130	GCF_006385075.1	Acinetobacter baumannii	4130187	1	0	0
ACBA002.0321.00131	GCF_007107525.1	Acinetobacter baumannii	3960760	0	0	0
ACBA002.0321.00132	GCF_007221455.1	Acinetobacter baumannii	3896541	1	0	0
ACBA002.0321.00133	GCF_007647215.1	Acinetobacter baumannii	4002648	0	0	0
ACBA002.0321.00135	GCF_008124045.1	Acinetobacter baumannii	3843574	0	0	0
ACBA002.0321.00136	GCF_008244865.1	Acinetobacter baumannii	3935331	0	1	0
ACBA002.0321.00137	GCF_008244885.1	Acinetobacter baumannii	3936362	0	1	0
ACBA002.0321.00138	GCF_008244905.1	Acinetobacter baumannii	3935083	0	1	0
ACBA002.0321.00139	GCF_008630895.1	Acinetobacter baumannii	3961713	0	0	0
ACBA002.0321.00140	GCF_008632635.1	Acinetobacter baumannii	3980230	0	0	0
ACBA002.0321.00141	GCF_008802935.1	Acinetobacter baumannii	3923146	0	0	0
ACBA002.0321.00142	GCF_008807055.1	Acinetobacter baumannii	4029386	0	0	0
ACBA002.0321.00143	GCF_008931365.1	Acinetobacter baumannii	4230606	1	0	0
ACBA002.0321.00144	GCF_009035845.1	Acinetobacter baumannii	3999136	0	0	0
ACBA002.0321.00145	GCF_009455505.1	Acinetobacter baumannii	4092125	0	1	0
ACBA002.0321.00146	GCF_009497995.1	Acinetobacter baumannii	4095749	0	0	0
ACBA002.0321.00147	GCF_009498335.1	Acinetobacter baumannii	4030371	0	0	0
ACBA002.0321.00148	GCF_009740145.1	Acinetobacter baumannii	3919248	0	0	0
ACBA002.0321.00149	GCF_009759685.1	Acinetobacter baumannii	3990388	0	0	0
ACBA002.0321.00150	GCF_009833005.1	Acinetobacter baumannii	3809822	0	0	0
ACBA002.0321.00151	GCF_011067065.1	Acinetobacter baumannii	3884786	0	1	0
ACBA002.0321.00152	GCF_012272715.1	Acinetobacter baumannii	4118119	0	1	0
ACBA002.0321.00153	GCF_012272735.1	Acinetobacter baumannii	4229508	1	1	0
ACBA002.0321.00154	GCF_012272755.1	Acinetobacter baumannii	4147490	1	1	0
ACBA002.0321.00155	GCF_012272775.1	Acinetobacter baumannii	4050436	0	1	0
ACBA002.0321.00156	GCF_012272795.1	Acinetobacter baumannii	4095067	1	1	0
ACBA002.0321.00157	GCF_012931605.1	Acinetobacter baumannii	3940086	0	0	0
ACBA002.0321.00158	GCF_012931625.1	Acinetobacter baumannii	4174734	1	0	0
ACBA002.0321.00159	GCF_012931645.1	Acinetobacter baumannii	4159123	1	0	0
ACBA002.0321.00160	GCF_012931665.1	Acinetobacter baumannii	3965881	0	0	0
ACBA002.0321.00161	GCF_012934905.1	Acinetobacter baumannii	4433724	0	1	0
ACBA002.0321.00162	GCF_012934925.1	Acinetobacter baumannii	3964720	0	0	0
ACBA002.0321.00163	GCF_012934945.1	Acinetobacter baumannii	3928362	0	0	0
ACBA002.0321.00164	GCF_012934965.1	Acinetobacter baumannii	4070457	0	0	0
ACBA002.0321.00165	GCF_012934985.1	Acinetobacter baumannii	3952539	0	0	0
ACBA002.0321.00166	GCF_012935005.1	Acinetobacter baumannii	4277869	0	0	0
ACBA002.0321.00167	GCF_012935025.1	Acinetobacter baumannii	4015124	0	0	0
ACBA002.0321.00168	GCF_012935045.1	Acinetobacter baumannii	3935172	0	0	0
ACBA002.0321.00169	GCF_012935065.1	Acinetobacter baumannii	4045545	0	0	0
ACBA002.0321.00170	GCF_012935085.1	Acinetobacter baumannii	4180241	0	1	0
ACBA002.0321.00171	GCF_012935105.1	Acinetobacter baumannii	4189963	0	1	0
ACBA002.0321.00172	GCF_012935125.1	Acinetobacter baumannii	4133398	0	1	0
ACBA002.0321.00173	GCF_012935145.1	Acinetobacter baumannii	4061210	0	0	0
ACBA002.0321.00174	GCF_012935165.1	Acinetobacter baumannii	4015241	0	0	0
ACBA002.0321.00175	GCF_012935185.1	Acinetobacter baumannii	4017107	0	0	0
ACBA002.0321.00176	GCF_012974585.1	Acinetobacter baumannii	4126782	0	1	0
ACBA002.0321.00177	GCF_012974845.1	Acinetobacter baumannii	4080415	0	1	0
ACBA002.0321.00178	GCF_013305465.1	Acinetobacter baumannii	4082498	0	1	0
ACBA002.0321.00179	GCF_013376855.2	Acinetobacter baumannii	3873271	0	1	0
ACBA002.0321.00180	GCF_013377175.1	Acinetobacter baumannii	4161887	0	0	0
ACBA002.0321.00181	GCF_013394265.1	Acinetobacter baumannii	3931210	0	0	0
ACBA002.0321.00182	GCF_013394285.1	Acinetobacter baumannii	4133247	0	0	0
ACBA002.0321.00183	GCF_013416255.1	Acinetobacter baumannii	3971708	0	2	0
ACBA002.0321.00184	GCF_013416275.1	Acinetobacter baumannii	3869649	0	0	0
ACBA002.0321.00185	GCF_013787185.1	Acinetobacter baumannii	3934032	0	0	0
ACBA002.0321.00186	GCF_014159355.1	Acinetobacter baumannii	3943032	0	0	0
ACBA002.0321.00187	GCF_014169655.1	Acinetobacter baumannii	3852747	0	0	0
ACBA002.0321.00188	GCF_014171935.1	Acinetobacter baumannii	4022726	0	0	0
ACBA002.0321.00189	GCF_014267385.1	Acinetobacter baumannii	3909403	0	0	0
ACBA002.0321.00190	GCF_014322245.1	Acinetobacter baumannii	4105826	0	0	0
ACBA002.0321.00191	GCF_014672735.1	Acinetobacter baumannii	3750370	0	0	0
ACBA002.0321.00192	GCF_014672755.1	Acinetobacter baumannii	3980852	0	0	0
ACBA002.0321.00193	GCF_014672775.1	Acinetobacter baumannii	4023111	0	0	0
ACBA002.0321.00194	GCF_014705785.1	Acinetobacter baumannii	4151591	1	0	0
ACBA002.0321.00195	GCF_014705805.1	Acinetobacter baumannii	4179318	1	0	0
ACBA002.0321.00196	GCF_014705825.1	Acinetobacter baumannii	4045800	2	0	0
ACBA002.0321.00197	GCF_014705845.1	Acinetobacter baumannii	4095679	1	0	0
ACBA002.0321.00198	GCF_014705865.1	Acinetobacter baumannii	4049006	1	0	0
ACBA002.0321.00199	GCF_014705885.1	Acinetobacter baumannii	4148158	1	0	0
ACBA002.0321.00200	GCF_014874575.1	Acinetobacter baumannii	4566577	0	0	0
ACBA002.0321.00201	GCF_015571935.1	Acinetobacter baumannii	3953079	0	0	0
ACBA002.0321.00202	GCF_015732435.1	Acinetobacter baumannii	4103762	0	1	0
ACBA002.0321.00203	GCF_015870765.1	Acinetobacter baumannii	3879291	0	1	0
ACBA002.0321.00204	GCF_015870965.1	Acinetobacter baumannii	3880463	0	1	0
ACBA002.0321.00205	GCF_015910475.1	Acinetobacter baumannii	4032448	0	0	0
ACBA002.0321.00206	GCF_016127515.1	Acinetobacter baumannii	4050392	1	0	0
ACBA002.0321.00207	GCF_016350005.1	Acinetobacter baumannii	4073824	0	1	0
ACBA002.0321.00208	GCF_016350065.1	Acinetobacter baumannii	4088238	0	1	0
ACBA002.0321.00209	GCF_016350085.1	Acinetobacter baumannii	4090092	0	1	0
ACBA002.0321.00210	GCF_016350105.1	Acinetobacter baumannii	4076358	0	1	0
ACBA002.0321.00211	GCF_016864295.1	Acinetobacter baumannii	4088883	0	0	0
ACBA002.0321.00212	GCF_016864315.1	Acinetobacter baumannii	3898606	0	0	0
ACBA002.0321.00213	GCF_016864335.1	Acinetobacter baumannii	3883244	0	0	0
ACBA002.0321.00214	GCF_016864915.1	Acinetobacter baumannii	4092873	0	0	0
ACBA002.0321.00215	GCF_016865465.1	Acinetobacter baumannii	4011788	0	0	0
ACBA002.0321.00216	GCF_016903135.1	Acinetobacter baumannii	4070121	0	1	0
ACBA002.0321.00217	GCF_016903215.1	Acinetobacter baumannii	3898281	0	1	0
ACBA002.0321.00218	GCF_016919505.1	Acinetobacter baumannii	4097902	1	1	0
ACBA002.0321.00219	GCF_017096325.1	Acinetobacter baumannii	3968880	0	0	0
ACBA002.0321.00220	GCF_017096345.1	Acinetobacter baumannii	3909225	0	0	0
ACBA002.0321.00221	GCF_017096365.1	Acinetobacter baumannii	3952161	0	0	0
ACBA002.0321.00222	GCF_017096385.1	Acinetobacter baumannii	3917538	0	1	0
ACBA002.0321.00223	GCF_017096405.1	Acinetobacter baumannii	3917843	0	0	0
ACBA002.0321.00224	GCF_017096425.1	Acinetobacter baumannii	4031466	0	1	0
ACBA002.0321.00225	GCF_017098185.1	Acinetobacter baumannii	3903779	0	0	0
ACBA002.0321.00226	GCF_017098205.1	Acinetobacter baumannii	4069635	1	1	0
ACBA002.0321.00227	GCF_017098225.1	Acinetobacter baumannii	4035631	0	1	0
ACBA002.0321.00228	GCF_017098245.1	Acinetobacter baumannii	3939144	0	0	0
ACBA002.0321.00229	GCF_017098265.1	Acinetobacter baumannii	3939099	0	0	0
ACBA002.0321.00230	GCF_900088705.1	Acinetobacter baumannii	4050765	1	0	0
ACBA002.0321.00231	GCF_900093475.1	Acinetobacter baumannii	4128983	0	0	0
ACBA002.0321.00232	GCF_900478145.1	Acinetobacter baumannii	4044162	1	0	0
ACBA002.0321.00233	GCF_004797155.2	Acinetobacter baumannii ATCC 17978	4016303	0	0	0
ACBA002.0321.00234	GCF_013372085.1	Acinetobacter baumannii ATCC 17978	4030054	0	0	0
ACBA002.0321.00235	GCF_000018445.1	Acinetobacter baumannii ACICU	3996761	1	0	0
ACBA002.0321.00236	GCF_005519135.1	Acinetobacter baumannii ACICU	4013643	1	0	0
ACBA002.0321.00237	GCF_000021245.2	Acinetobacter baumannii AB0057	4063879	1	0	0
ACBA002.0321.00238	GCF_000226275.2	Acinetobacter baumannii MDR-ZJ06	4022275	1	1	0
ACBA002.0321.00239	GCF_000069245.1	Acinetobacter baumannii AYE	4048735	1	1	1
ACBA002.0321.00240	GCF_002803025.2	Acinetobacter baumannii AB307-0294	3759495	0	0	0
ACBA002.0321.00241	GCF_000188215.1	Acinetobacter baumannii 1656-2	4023106	0	1	0
ACBA002.0321.00242	GCF_000187205.2	Acinetobacter baumannii MDR-TJ	4153407	0	2	0
ACBA002.0321.00243	GCF_000186665.3	Acinetobacter baumannii D1279779	3711700	0	0	0
ACBA002.0321.00244	GCF_000419385.1	Acinetobacter baumannii BJAB07104	4042229	0	1	0
ACBA002.0321.00245	GCF_000419405.1	Acinetobacter baumannii BJAB0715	4053889	0	0	0
ACBA002.0321.00246	GCF_000419425.1	Acinetobacter baumannii BJAB0868	4005822	0	1	0
ACBA002.0321.00247	GCF_000302575.1	Acinetobacter baumannii TYTH-1	3957368	0	1	0
ACBA002.0321.00248	GCF_000498375.2	Acinetobacter baumannii DU202	4178958	0	1	0
ACBA002.0321.00249	GCF_000505685.1	Acinetobacter baumannii ZW85-1	3925246	0	0	0
ACBA002.0321.00250	GCF_000828795.1	Acinetobacter baumannii NCGM 237	4021920	0	1	0
ACBA002.0321.00251	GCF_000786735.1	Acinetobacter baumannii LAC-4	3968436	0	0	0
ACBE001.0321.00001	GCF_002813045.1	Acinetobacter bereziniae	4509124	0	0	0
ACBE001.0321.00002	GCF_016576845.1	Acinetobacter bereziniae	4749411	0	0	0
ACBO001.0321.00001	GCF_000025665.1	Aciduliprofundum boonei T469	1486778	0	0	0
ACBR001.0321.00001	GCF_003201835.2	Acidianus brierleyi	2947244	0	0	0
ACBR002.0321.00001	GCF_000967915.1	Acholeplasma brassicae	1877792	0	0	0
ACCA001.0321.00001	GCF_001650235.3	Acidithiobacillus caldus	2950006	0	0	0
ACCA001.0321.00002	GCF_000175575.2	Acidithiobacillus caldus ATCC 51756	2987045	0	0	0
ACCA001.0321.00003	GCF_000221025.1	Acidithiobacillus caldus SM-1	3237599	0	0	0
ACCA002.0321.00001	GCF_000022565.1	Acidobacterium capsulatum ATCC 51196	4127356	0	0	0
ACCA003.0321.00001	GCF_002055515.1	Acinetobacter calcoaceticus	4115994	0	0	0
ACCA003.0321.00002	GCF_016939475.1	Acinetobacter calcoaceticus	3915231	0	0	0
ACCA003.0321.00003	GCF_900520355.1	Acinetobacter calcoaceticus	3934114	0	0	0
ACCA004.0321.00001	GCF_002157125.1	Acidovorax carolinensis	4704737	0	0	0
ACCA004.0321.00002	GCF_002157145.1	Acidovorax carolinensis	4122625	0	0	0
ACCA004.0321.00003	GCF_002157165.1	Acidovorax carolinensis	4058023	0	0	0
ACCA004.0321.00004	GCF_002157185.1	Acidovorax carolinensis	4565632	0	0	0
ACCE001.0321.00001	GCF_000015025.1	Acidothermus cellulolyticus 11B	2443540	0	0	0
ACCH001.0321.00001	GCF_002165375.2	Acinetobacter chinensis	3735891	0	0	0
ACCI001.0321.00001	GCF_001593665.2	Acidovorax citrulli	4899546	0	0	0
ACCI001.0321.00002	GCF_002441975.1	Acidovorax citrulli	5349924	0	0	0
ACCI001.0321.00003	GCF_000015325.1	Acidovorax citrulli AAC00-1	5352772	0	0	0
ACCR001.0321.00001	GCF_000016725.1	Acidiphilium cryptum JF-5	3963080	0	0	0
ACCU001.0321.00001	GCF_003024525.3	Acinetobacter cumulans	3710871	0	0	0
ACDE001.0321.00001	GCF_016127315.1	Achromobacter deleyi	6987272	0	0	0
ACDE002.0321.00001	GCF_001704615.3	Acinetobacter defluvii	3812268	1	0	0
ACDE003.0321.00001	GCF_001514355.1	Achromobacter denitrificans	6226215	0	0	0
ACDE003.0321.00002	GCF_002205315.1	Achromobacter denitrificans	6929205	0	1	0
ACDE003.0321.00003	GCF_003812265.1	Achromobacter denitrificans	7010850	0	0	0
ACDE003.0321.00004	GCF_013267375.1	Achromobacter denitrificans	6736877	0	0	0
ACDE003.0321.00005	GCF_013267395.1	Achromobacter denitrificans	6736870	0	0	0
ACDE003.0321.00006	GCF_013343095.1	Achromobacter denitrificans	6816538	0	0	0
ACDE004.0321.00001	GCF_900638385.1	Actinobacillus delphinicola	1837244	0	0	0
ACDI001.0321.00001	GCF_009884975.1	Acinetobacter dispersus	4024840	0	0	0
ACEB001.0321.00001	GCF_000022305.1	Acidovorax ebreus TPSY	3796573	1	1	0
ACEQ001.0321.00001	GCF_001307195.1	Acinetobacter equi	3054269	0	0	0
ACEQ002.0321.00001	GCF_900636745.1	Actinobacillus equuli	2451991	0	0	0
ACEQ002.0321.00002	GCF_000801145.1	Actinobacillus equuli subsp. equuli	2431533	0	0	0
ACER001.0321.00001	GCF_002263515.1	Actinopolyspora erythraea	5243930	0	0	0
ACFE001.0321.00001	GCF_003966655.1	Acidithiobacillus ferridurans	2921399	1	1	0
ACFE002.0321.00001	GCF_016250455.1	Acidithiobacillus ferrivorans	3161380	0	1	0
ACFE002.0321.00002	GCF_000214095.2	Acidithiobacillus ferrivorans SS3	3207552	0	2	0
ACFE003.0321.00001	GCF_000023265.1	Acidimicrobium ferrooxidans DSM 10331	2158157	0	0	0
ACFE004.0321.00001	GCF_000025305.1	Acidaminococcus fermentans DSM 20731	2329769	0	0	0
ACFE005.0321.00001	GCF_013462805.1	Acidithiobacillus ferrooxidans	3257037	0	1	0
ACFE005.0321.00002	GCF_000021485.1	Acidithiobacillus ferrooxidans ATCC 23270	2982397	0	1	0
ACFE005.0321.00003	GCF_000020825.1	Acidithiobacillus ferrooxidans ATCC 53993	2885038	0	1	0
ACFJ001.0321.00001	GCF_001941625.1	Actinoalloteichus fjordicus	7120854	0	0	0
ACFO001.0321.00001	GCF_003352165.1	Acidibrevibacterium fodinaquatile	4037611	0	0	0
ACFR001.0321.00001	GCF_000494755.1	Actinoplanes friuliensis DSM 7358	9376071	0	0	0
ACGA001.0321.00001	GCF_002076915.1	Actinomyces gaoshouyii	2359360	0	0	0
ACGU001.0321.00001	GCF_002370525.2	Acinetobacter guillouiae	4648418	0	0	0
ACGY001.0321.00001	GCF_009884295.1	Acinetobacter gyllenbergii	4091186	0	0	0
ACHA001.0321.00001	GCF_001932555.1	Acinetobacter haemolyticus	3538838	0	0	0
ACHA001.0321.00002	GCF_002813065.1	Acinetobacter haemolyticus	3322046	0	0	0
ACHA001.0321.00003	GCF_003323815.1	Acinetobacter haemolyticus	3441166	0	0	0
ACHA001.0321.00004	GCF_003430865.2	Acinetobacter haemolyticus	3681073	0	0	0
ACHA001.0321.00005	GCF_004379355.1	Acinetobacter haemolyticus	3734602	0	1	0
ACHA001.0321.00006	GCF_009892245.1	Acinetobacter haemolyticus	3694983	0	0	0
ACHA001.0321.00007	GCF_009892265.1	Acinetobacter haemolyticus	3669945	0	0	0
ACHA001.0321.00008	GCF_009892285.1	Acinetobacter haemolyticus	3674400	0	0	0
ACHA001.0321.00009	GCF_009892305.1	Acinetobacter haemolyticus	3685065	0	0	0
ACHA001.0321.00010	GCF_009892325.1	Acinetobacter haemolyticus	3396816	0	0	0
ACHA001.0321.00011	GCF_009892345.1	Acinetobacter haemolyticus	3670325	0	0	0
ACHA001.0321.00012	GCF_009892365.1	Acinetobacter haemolyticus	3558578	0	1	0
ACHA001.0321.00013	GCF_009892385.1	Acinetobacter haemolyticus	3615227	0	1	0
ACHI001.0321.00001	GCF_900660755.1	Acholeplasma hippikon	1465667	0	0	0
ACHO001.0321.00001	GCF_002234535.1	Actinoalloteichus hoggarensis	6606717	0	0	0
ACHO002.0321.00001	GCF_900637165.1	Actinomyces howellii	3148934	0	0	0
ACHO003.0321.00001	GCF_000213215.1	Acidianus hospitalis W1	2137654	0	0	0
ACIN001.0321.00001	GCF_000230275.1	Acidaminococcus intestini RyC-MR95	2487765	0	0	0
ACIN002.0321.00001	GCF_000783435.2	Achromobacter insolitus	6893045	0	0	0
ACIN002.0321.00002	GCF_001971645.1	Achromobacter insolitus	6492697	0	0	0
ACIN002.0321.00003	GCF_008245125.1	Achromobacter insolitus	6428890	0	0	0
ACIN002.0321.00004	GCF_900637265.1	Achromobacter insolitus	6472476	0	0	0
ACIN004.0321.00001	GCF_002953575.2	Acinetobacter indicus	3157380	0	0	0
ACIN004.0321.00002	GCF_009296145.1	Acinetobacter indicus	3254850	0	0	0
ACIN004.0321.00003	GCF_009734145.1	Acinetobacter indicus	3256420	0	0	0
ACIN004.0321.00004	GCF_009914375.1	Acinetobacter indicus	3107012	0	1	0
ACIN004.0321.00005	GCF_009914395.1	Acinetobacter indicus	3277303	0	1	0
ACIN004.0321.00006	GCF_009914415.1	Acinetobacter indicus	3046578	0	0	0
ACIN004.0321.00007	GCF_009914435.1	Acinetobacter indicus	3118196	0	0	0
ACIN004.0321.00008	GCF_009914475.1	Acinetobacter indicus	3084932	0	0	0
ACIN004.0321.00009	GCF_010917815.1	Acinetobacter indicus	3318518	0	1	0
ACIN004.0321.00010	GCF_010918195.1	Acinetobacter indicus	3167100	0	1	0
ACIN004.0321.00011	GCF_010918375.1	Acinetobacter indicus	3632894	0	1	0
ACIN004.0321.00012	GCF_012278715.1	Acinetobacter indicus	3194058	0	0	0
ACIN004.0321.00013	GCF_012278735.1	Acinetobacter indicus	3038308	0	0	0
ACIN004.0321.00014	GCF_013378115.1	Acinetobacter indicus	3187474	0	0	0
ACIN004.0321.00015	GCF_015217905.1	Acinetobacter indicus	3455091	0	1	0
ACIN004.0321.00016	GCF_015218885.1	Acinetobacter indicus	3075882	0	0	0
ACIN004.0321.00017	GCF_017132735.1	Acinetobacter indicus	3212811	1	0	0
ACIS001.0321.00001	GCF_900637225.1	Actinomyces israelii	2572997	0	0	0
ACJE001.0321.00001	GCF_004011055.1	Acidipropionibacterium jensenii	3044937	0	0	0
ACJE001.0321.00002	GCF_004011075.1	Acidipropionibacterium jensenii	3032477	0	0	0
ACJE001.0321.00003	GCF_005890135.1	Acidipropionibacterium jensenii	2999408	0	0	0
ACJE001.0321.00004	GCF_900637925.1	Acidipropionibacterium jensenii	3180547	0	0	0
ACJI001.0321.00001	GCF_004359375.1	Acetilactobacillus jinshanensis	1616430	0	0	0
ACJO001.0321.00001	GCF_003335165.1	Acinetobacter johnsonii	3398706	0	0	0
ACJO001.0321.00002	GCF_003952785.1	Acinetobacter johnsonii	3736232	0	0	0
ACJO001.0321.00003	GCF_004337595.1	Acinetobacter johnsonii	3804254	0	0	0
ACJO001.0321.00004	GCF_008180305.1	Acinetobacter johnsonii	3835186	0	0	0
ACJO001.0321.00005	GCF_015602645.1	Acinetobacter johnsonii	3521987	0	0	0
ACJO001.0321.00006	GCF_016027055.1	Acinetobacter johnsonii	3617455	0	0	0
ACJO001.0321.00007	GCF_016725945.1	Acinetobacter johnsonii	3863305	0	0	0
ACJO001.0321.00008	GCF_016726625.1	Acinetobacter johnsonii	3524396	0	0	0
ACJO001.0321.00009	GCF_016728805.1	Acinetobacter johnsonii	4135620	0	0	0
ACJO001.0321.00010	GCF_017068175.1	Acinetobacter johnsonii	3631330	0	0	0
ACJO001.0321.00011	GCF_001484935.1	Acinetobacter johnsonii XBB1	4081329	1	0	0
ACJU001.0321.00001	GCF_001941805.1	Acinetobacter junii	3378307	0	1	0
ACJU001.0321.00002	GCF_002165245.3	Acinetobacter junii	3392425	0	0	0
ACJU001.0321.00003	GCF_002761875.1	Acinetobacter junii	3288057	0	0	0
ACJU001.0321.00004	GCF_016743155.1	Acinetobacter junii	3361061	0	0	0
ACLA001.0321.00001	GCF_002076935.1	Acinetobacter lactucae	3981712	0	0	0
ACLA001.0321.00002	GCF_013122135.1	Acinetobacter lactucae	3973648	0	0	0
ACLA002.0321.00001	GCF_001704115.1	Acinetobacter larvae	3741098	0	0	0
ACLA003.0321.00001	GCF_900476025.1	Acholeplasma laidlawii	1497557	0	0	0
ACLA003.0321.00002	GCF_000018785.1	Acholeplasma laidlawii PG-8A	1496992	0	0	0
ACLA004.0321.00001	GCF_011578285.1	Acinetobacter lanii	3428714	0	0	0
ACLI001.0321.00001	GCF_900635785.1	Actinobacillus lignieresii	2377048	0	0	0
ACLW001.0321.00001	GCF_009730095.1	Acinetobacter lwoffii	3485472	0	0	0
ACMA002.0321.00001	GCF_013177295.1	Actinomyces marmotae	2419502	0	0	0
ACMA003.0321.00001	GCF_002116695.1	Acidianus manzaensis	2687463	0	0	0
ACMI001.0321.00001	GCF_000284295.1	Actinoplanes missouriensis 431	8773466	0	0	0
ACMI002.0321.00001	GCF_000023245.1	Actinosynnema mirum DSM 43827	8248144	0	0	0
ACMO001.0321.00001	GCF_014489595.1	Acidovorax monticola	4679990	1	0	0
ACMO002.0321.00001	GCF_000266925.1	Acetomicrobium mobile DSM 13181	2160700	0	0	0
ACMU001.0321.00001	GCF_000202835.1	Acidiphilium multivorum AIU301	4214744	0	0	0
ACNA001.0321.00001	GCF_016127855.1	Actinomyces naeslundii	3152123	0	0	0
ACNO001.0321.00001	GCF_000814165.3	Acinetobacter nosocomialis	4061750	0	0	0
ACNO001.0321.00002	GCF_002082665.1	Acinetobacter nosocomialis	4142356	0	0	0
ACNO001.0321.00003	GCF_002951295.1	Acinetobacter nosocomialis	4002679	0	0	0
ACNO001.0321.00004	GCF_003143895.1	Acinetobacter nosocomialis	4010110	0	0	0
ACNO001.0321.00005	GCF_004295305.1	Acinetobacter nosocomialis	3958196	0	0	0
ACNO001.0321.00006	GCF_004792395.1	Acinetobacter nosocomialis	3793191	0	0	0
ACNO001.0321.00007	GCF_008086325.1	Acinetobacter nosocomialis	3942632	0	0	0
ACNO001.0321.00008	GCF_009588945.1	Acinetobacter nosocomialis	4154154	0	0	0
ACNO001.0321.00009	GCF_015602685.1	Acinetobacter nosocomialis	4027274	0	0	0
ACNO001.0321.00010	GCF_005281455.1	Acinetobacter nosocomialis M2	3824973	0	0	0
ACOL001.0321.00001	GCF_000196795.1	Acinetobacter oleivorans DR1	4152543	0	0	0
ACOR001.0321.00001	GCF_003966365.1	Acetobacter orientalis	3214967	0	0	0
ACOR002.0321.00001	GCF_001628715.1	Acetobacter oryzifermentans	3106397	0	0	0
ACOR002.0321.00002	GCF_002220195.1	Acetobacter oryzifermentans	3127455	0	0	0
ACOR003.0321.00001	GCF_004014775.2	Acetobacter oryzoeni	3153180	0	0	0
ACOR004.0321.00001	GCF_001553935.1	Actinomyces oris	3042917	0	0	0
ACOR004.0321.00002	GCF_016127955.1	Actinomyces oris	3184721	0	0	0
ACPA001.0321.00001	GCF_900120245.1	Actinomyces pacaensis	1892549	0	0	0
ACPA002.0321.00001	GCF_000968055.1	Acholeplasma palmae J233	1554229	0	0	0
ACPA003.0321.00001	GCF_001183745.1	Acetobacter pasteurianus	2806148	0	0	0
ACPA003.0321.00002	GCF_009914215.1	Acetobacter pasteurianus	3056995	0	0	0
ACPA003.0321.00003	GCF_002173735.1	Acetobacter pasteurianus subsp. Pasteurianus	3287976	0	0	0
ACPA003.0321.00004	GCF_002202135.1	Acetobacter pasteurianus subsp. Pasteurianus	3408817	0	0	0
ACPA003.0321.00005	GCF_000010825.1	Acetobacter pasteurianus IFO 3283-01	3340249	0	0	0
ACPA003.0321.00006	GCF_000010845.1	Acetobacter pasteurianus IFO 3283-03	3339669	0	0	0
ACPA003.0321.00007	GCF_000010865.1	Acetobacter pasteurianus IFO 3283-07	3338426	0	0	0
ACPA003.0321.00008	GCF_000010885.1	Acetobacter pasteurianus IFO 3283-22	3339649	0	0	0
ACPA003.0321.00009	GCF_000010905.1	Acetobacter pasteurianus IFO 3283-26	3339683	0	0	0
ACPA003.0321.00010	GCF_000010925.1	Acetobacter pasteurianus IFO 3283-32	3337040	0	0	0
ACPA003.0321.00011	GCF_000010945.1	Acetobacter pasteurianus IFO 3283-01-42C	3247995	0	0	0
ACPA003.0321.00013	GCF_000241585.2	Acetobacter pasteurianus NBRC 101655	3100990	0	0	0
ACPE001.0321.00001	GCF_002006565.1	Acetobacter persici	3756676	0	0	0
ACPI001.0321.00001	GCF_015218165.1	Acinetobacter piscicola	4280081	0	1	0
ACPI002.0321.00001	GCF_001577285.1	Acinetobacter pittii	4216804	0	0	0
ACPI002.0321.00003	GCF_002012285.1	Acinetobacter pittii	4045824	0	0	0
ACPI002.0321.00004	GCF_002158945.1	Acinetobacter pittii	4182874	0	0	0
ACPI002.0321.00005	GCF_002863745.1	Acinetobacter pittii	4099621	0	0	0
ACPI002.0321.00006	GCF_002902805.2	Acinetobacter pittii	4253404	0	0	0
ACPI002.0321.00009	GCF_003051965.2	Acinetobacter pittii	4253251	0	0	0
ACPI002.0321.00011	GCF_007954485.1	Acinetobacter pittii	4264965	1	0	0
ACPI002.0321.00013	GCF_008694085.1	Acinetobacter pittii	4009633	0	0	0
ACPI002.0321.00014	GCF_009931315.1	Acinetobacter pittii	3990427	0	0	0
ACPI002.0321.00015	GCF_011996285.1	Acinetobacter pittii	4161573	0	0	0
ACPI002.0321.00016	GCF_014168695.1	Acinetobacter pittii	4181682	0	0	0
ACPI002.0321.00017	GCF_016804045.1	Acinetobacter pittii	4179919	0	0	0
ACPI002.0321.00019	GCF_016889345.1	Acinetobacter pittii	3889187	0	0	0
ACPI002.0321.00021	GCF_016890065.1	Acinetobacter pittii	3928855	0	0	0
ACPI002.0321.00022	GCF_000191145.1	Acinetobacter pittii PHEA-2	3862530	0	0	0
ACPL001.0321.00001	GCF_003290385.1	Actinobacillus pleuropneumoniae	2318657	0	0	0
ACPL001.0321.00002	GCF_003431405.1	Actinobacillus pleuropneumoniae	2365505	0	0	0
ACPL001.0321.00003	GCF_900475195.1	Actinobacillus pleuropneumoniae	2335264	0	0	0
ACPL001.0321.00005	GCF_000178495.2	Actinobacillus pleuropneumoniae serovar 1 str. 4074	2318649	0	0	0
ACPL001.0321.00006	GCF_000015885.1	Actinobacillus pleuropneumoniae serovar 5b str. L20	2274482	0	0	0
ACPL001.0321.00007	GCF_000016685.1	Actinobacillus pleuropneumoniae serovar 3 str. JL03	2242062	0	0	0
ACPL001.0321.00008	GCF_000020405.1	Actinobacillus pleuropneumoniae serovar 7 str. AP76	2345435	0	0	0
ACPL001.0321.00009	GCF_001460855.1	Actinobacillus pleuropneumoniae serovar 8	2337633	0	0	0
ACPO001.0321.00001	GCF_003101015.1	Actinobacillus porcitonsillarum	2263191	0	0	0
ACPO003.0321.00001	GCF_002456135.1	Acetobacter pomorum	3007920	0	0	0
ACPO003.0321.00002	GCF_003391275.1	Acetobacter pomorum	3153219	0	0	0
ACPR001.0321.00001	GCF_001753245.1	Acidihalobacter prosperus	3566941	1	3	0
ACPR002.0321.00001	GCF_004798665.1	Actinomyces procaprae	3600355	0	0	0
ACRA001.0321.00001	GCF_001553565.1	Actinomyces radicidentis	3051613	0	0	0
ACRA002.0321.00002	GCF_003258335.1	Acinetobacter radioresistens	3089777	0	0	0
ACRA002.0321.00004	GCF_006757745.1	Acinetobacter radioresistens DSM 6976 = NBRC 102413 = CIP 103788	3433938	0	0	0
ACSA001.0321.00001	GCF_000144915.1	Acidilobus saccharovorans 345-15	1496453	0	0	0
ACSC001.0321.00001	GCF_001971565.1	Acinetobacter schindleri	3268053	0	0	0
ACSC001.0321.00002	GCF_003072585.2	Acinetobacter schindleri	3244663	0	0	0
ACSC001.0321.00006	GCF_010919095.1	Acinetobacter schindleri	3320700	0	1	0
ACSC002.0321.00001	GCF_000724605.1	Actinotignum schaalii	2159306	0	0	0
ACSE001.0321.00002	GCF_014718355.1	Acinetobacter seifertii	4154390	0	0	0
ACSE001.0321.00003	GCF_014719215.1	Acinetobacter seifertii	4280510	0	1	0
ACSE001.0321.00004	GCF_014719435.1	Acinetobacter seifertii	4497461	0	1	0
ACSE001.0321.00005	GCF_014719835.1	Acinetobacter seifertii	4316806	0	0	0
ACSE001.0321.00007	GCF_014720495.1	Acinetobacter seifertii	4531666	0	1	0
ACSE001.0321.00008	GCF_014720855.1	Acinetobacter seifertii	4575801	0	1	0
ACSE001.0321.00009	GCF_014721075.1	Acinetobacter seifertii	4501530	0	0	0
ACSE001.0321.00010	GCF_014721215.1	Acinetobacter seifertii	4000660	0	0	0
ACSE001.0321.00014	GCF_014722015.1	Acinetobacter seifertii	4091819	0	0	0
ACSE001.0321.00015	GCF_014722775.1	Acinetobacter seifertii	4321793	0	1	0
ACSE001.0321.00016	GCF_014723035.1	Acinetobacter seifertii	4071624	0	0	0
ACSE001.0321.00017	GCF_014723055.1	Acinetobacter seifertii	4247815	0	1	0
ACSE001.0321.00018	GCF_014723095.1	Acinetobacter seifertii	4319638	0	0	0
ACSE001.0321.00019	GCF_014723135.1	Acinetobacter seifertii	4248862	0	1	0
ACSE001.0321.00020	GCF_014723155.1	Acinetobacter seifertii	4084907	0	0	0
ACSE001.0321.00021	GCF_014723195.1	Acinetobacter seifertii	4336625	0	1	0
ACSE001.0321.00022	GCF_014788525.1	Acinetobacter seifertii	4384021	0	0	0
ACSE002.0321.00001	GCF_001499615.1	Acetobacter senegalensis	3969909	0	0	0
ACSH001.0321.00001	GCF_011578045.1	Acinetobacter shaoyimingii	3571042	0	0	0
ACSL001.0321.00001	GCF_900637295.1	Actinomyces slackii	3220508	0	0	0
ACSO001.0321.00001	GCF_001953195.1	Acinetobacter soli	3636349	0	0	0
ACSP001.0321.00001	GCF_008824145.1	Actinomadura sp. WMMB 499	9187113	0	0	0
ACSP004.0321.00001	GCF_001612555.1	Acinetobacter sp. TGL-Y2	3691287	0	0	0
ACSP005.0321.00001	GCF_003431325.1	Acidilobus sp. 7A	1539049	0	0	0
ACSP006.0321.00001	GCF_001647675.1	Acinetobacter sp. NCu2D-2	3048277	0	0	0
ACSP007.0321.00001	GCF_001941645.1	Actinoalloteichus sp. GBA129-24	7275385	0	0	0
ACSP008.0321.00001	GCF_002934695.1	Acinetobacter sp. ACNIH1	3696158	0	0	0
ACSP009.0321.00001	GCF_001278715.1	Acinetobacter sp. TTH0-4	2962453	0	0	0
ACSP010.0321.00001	GCF_002934965.1	Acinetobacter sp. ACNIH2	4169274	0	1	0
ACSP012.0321.00001	GCF_002688565.1	Acinetobacter sp. LoGeW2-3	3357734	0	0	0
ACSP013.0321.00001	GCF_002980175.2	Acinetobacter sp. MYb10	4635013	0	0	0
ACSP014.0321.00001	GCF_001714725.1	Acidovorax sp. RAC01	4574859	1	0	0
ACSP015.0321.00001	GCF_002356195.1	Actinomyces sp. Chiba101	2877864	0	0	0
ACSP016.0321.00001	GCF_002176815.1	Acidovorax sp. T1	4416593	1	1	0
ACSP017.0321.00001	GCF_001696615.3	Acinetobacter sp. WCHAc010034	3840414	0	0	0
ACSP018.0321.00001	GCF_002165255.2	Acinetobacter sp. WCHA45	3092259	0	0	0
ACSP019.0321.00001	GCF_002165305.2	Acinetobacter sp. WCHA55	3967361	1	0	0
ACSP020.0321.00001	GCF_002165295.2	Acinetobacter sp. WCHAc010052	3630571	0	0	0
ACSP021.0321.00001	GCF_002717025.1	Actinoplanes sp. SE50	9239482	0	0	0
ACSP022.0321.00001	GCF_004010955.1	Actinomyces sp. 299	3107761	0	0	0
ACSP023.0321.00001	GCF_009930875.1	Actinomyces sp. 432	3141809	0	0	0
ACSP024.0321.00001	GCF_003111765.1	Actinomyces sp. Z16	3761642	0	0	0
ACSP025.0321.00001	GCF_002946595.1	Acinetobacter sp. SWBY1	2953039	0	0	0
ACSP026.0321.00001	GCF_002999235.1	Actinomyces sp. oral taxon 897	3249416	0	0	0
ACSP027.0321.00001	GCF_002812705.1	Achromobacter spanius	6425783	0	0	0
ACSP027.0321.00002	GCF_002966795.1	Achromobacter spanius	6340208	0	0	0
ACSP027.0321.00003	GCF_003994415.1	Achromobacter spanius	6687823	0	0	0
ACSP028.0321.00001	GCF_003323795.1	Acetobacter sp. JWB	2941821	0	0	0
ACSP029.0321.00001	GCF_003600685.1	Achromobacter sp. B7	6236552	0	0	0
ACSP030.0321.00001	GCF_000015545.1	Acidovorax sp. JS42	4585154	1	1	0
ACSP031.0321.00001	GCF_003812245.1	Acinetobacter sp. FDAARGOS_493	4021456	1	0	0
ACSP032.0321.00001	GCF_003812225.1	Acinetobacter sp. FDAARGOS_494	3953244	0	1	0
ACSP033.0321.00001	GCF_003812205.1	Acinetobacter sp. FDAARGOS_560	4166595	1	0	0
ACSP034.0321.00001	GCF_003669015.1	Acidovorax sp. 1608163	5045878	1	3	0
ACSP035.0321.00001	GCF_003073475.1	Actinobaculum sp. 313	2768961	0	0	0
ACSP036.0321.00001	GCF_013343215.1	Acinetobacter sp. 10FS3-1	3653128	0	0	0
ACSP037.0321.00001	GCF_008365315.1	Acetobacter sp. KACC 21233	3082251	0	0	0
ACSP038.0321.00001	GCF_015218525.1	Acinetobacter sp. YH12138	3719244	0	0	0
ACSP039.0321.00001	GCF_008630915.1	Acinetobacter sp. C16S1	3373643	0	0	0
ACSP040.0321.00001	GCF_008926505.1	Acidithiobacillus sp. 'AMD consortium'	2933811	1	1	0
ACSP041.0321.00001	GCF_014169935.1	Acinetobacter sp. BEC1-S18-ESBL-01	4031700	0	0	0
ACSP042.0321.00001	GCF_011751945.2	Actinomyces sp. zg-332	1540829	0	0	0
ACSP043.0321.00001	GCF_902825285.1	Acinetobacter sp. Marseille-Q1620	4084959	0	0	0
ACSP044.0321.00001	GCF_011303755.1	Acidovorax sp. HDW3	3152246	1	0	0
ACSP045.0321.00001	GCF_013184985.2	Actinomyces sp. ZJ34	2701426	0	0	0
ACSP046.0321.00001	GCF_012516415.1	Acinetobacter sp. NEB149	3490949	0	0	0
ACSP047.0321.00001	GCF_013364275.1	Actinomadura sp. NAK00032	9430849	0	0	0
ACSP048.0321.00001	GCF_013363755.1	Acidovorax sp. 16-35-5	5025439	0	0	0
ACSP049.0321.00001	GCF_013374795.1	Acinetobacter sp. NEB 394	3842079	0	0	0
ACSP050.0321.00001	GCF_014595995.2	Actinomyces sp. ZJ750	2912106	0	0	0
ACSP052.0321.00001	GCF_014274465.1	Acidobacterium sp. 4Y35	6271114	0	0	0
ACSP053.0321.00001	GCF_015711475.1	Actinomyces sp. zg-993	2526250	0	0	0
ACSP054.0321.00001	GCF_015224645.1	Acinetobacter sp. Ac-14	4078787	0	0	0
ACSP055.0321.00001	GCF_016626125.1	Actinomyces sp. HMT 897	3281265	0	0	0
ACSP056.0321.00001	GCF_016694895.1	Actinomyces sp. HMT 175	3024208	0	0	0
ACSP057.0321.00001	GCF_016599715.1	Acinetobacter sp. CS-2	3567654	0	0	0
ACSP058.0321.00001	GCF_000302535.1	Acidovorax sp. KKS102	5196935	0	0	0
ACSP060.0321.00001	GCF_000327505.1	Aciduliprofundum sp. MAR08-339	1437090	0	0	0
ACSP061.0321.00001	GCF_005696555.1	Actinomyces sp. oral taxon 171 str. F0337	3097489	0	0	0
ACSP062.0321.00001	GCF_013394715.1	Actinomyces sp. oral taxon 169	3040651	0	0	0
ACSP064.0321.00001	GCF_004001265.1	Actinoplanes sp. OR16	9293892	0	0	0
ACST001.0321.00001	GCF_000196455.1	Acetoanaerobium sticklandii	2715461	0	0	0
ACSU001.0321.00001	GCF_003201765.2	Acidianus sulfidivorans JP7	2265309	0	0	0
ACSU002.0321.00001	GCF_000017245.1	Actinobacillus succinogenes 130Z	2319663	0	0	0
ACSU003.0321.00001	GCF_900187155.1	Actinobacillus suis	2501959	0	0	0
ACSU003.0321.00002	GCF_000739435.1	Actinobacillus suis ATCC 33415	2501598	0	0	0
ACTA001.0321.00001	GCF_006965565.1	Acinetobacter tandoii	3556660	0	0	0
ACTE001.0321.00001	GCF_003711105.1	Actinoplanes teichomyceticus ATCC 31121	8287152	0	0	0
ACTH001.0321.00001	GCF_016865425.1	Actinocatenispora thailandica	7426695	0	0	0
ACTH002.0321.00001	GCF_009662475.1	Acidithiobacillus thiooxidans ATCC 19377	3415726	0	0	0
ACTO001.0321.00001	GCF_009676805.1	Acinetobacter towneri	2979276	0	2	0
ACTO001.0321.00002	GCF_012220585.1	Acinetobacter towneri	2829067	0	2	0
ACTR001.0321.00001	GCF_002549835.1	Acetobacter tropicalis	4139662	0	0	0
ACTR002.0321.00001	GCF_009650215.1	Actinomarinicola tropica	3715454	0	0	0
ACUR001.0321.00001	GCF_003966675.1	Acinetobacter ursingii	3568996	0	0	0
ACUR001.0321.00002	GCF_016726205.1	Acinetobacter ursingii	3612496	0	0	0
ACUR001.0321.00003	GCF_016726345.1	Acinetobacter ursingii	3487215	0	0	0
ACVA001.0321.00001	GCF_016607565.1	Acinetobacter variabilis	3481134	0	1	0
ACVI001.0321.00001	GCF_900637975.1	Actinomyces viscosus	3491241	0	0	0
ACVI002.0321.00001	GCF_003325455.1	Acidipropionibacterium virtanenii	3432872	0	0	0
ACWA001.0321.00001	GCF_009557235.1	Acinetobacter wanghuae	2767765	0	0	0
ACWE001.0321.00001	GCF_016598775.1	Actinomyces weissii	2564181	0	0	0
ACWO001.0321.00001	GCF_000247605.1	Acetobacterium woodii DSM 1030	4044777	0	0	0
ACWU001.0321.00001	GCF_001696605.3	Acinetobacter wuhouensis	3960451	0	1	0
ACWU001.0321.00002	GCF_002165345.2	Acinetobacter wuhouensis	4599140	1	0	0
ACXY001.0321.00001	GCF_001051055.1	Achromobacter xylosoxidans	5876049	0	0	0
ACXY001.0321.00002	GCF_001457475.1	Achromobacter xylosoxidans	6813182	0	0	0
ACXY001.0321.00004	GCF_001558915.1	Achromobacter xylosoxidans	6565735	0	0	0
ACXY001.0321.00005	GCF_001559195.1	Achromobacter xylosoxidans	6268754	0	0	0
ACXY001.0321.00006	GCF_008432465.1	Achromobacter xylosoxidans	6402982	0	0	0
ACXY001.0321.00007	GCF_009363015.1	Achromobacter xylosoxidans	6222121	0	0	0
ACXY001.0321.00008	GCF_013282235.1	Achromobacter xylosoxidans	6452474	0	1	0
ACXY001.0321.00009	GCF_013282255.1	Achromobacter xylosoxidans	6608203	0	0	0
ACXY001.0321.00010	GCF_013343135.1	Achromobacter xylosoxidans	6806438	0	0	0
ACXY001.0321.00011	GCF_014490035.1	Achromobacter xylosoxidans	6761376	0	0	0
ACXY001.0321.00012	GCF_016027035.1	Achromobacter xylosoxidans	6812921	0	0	0
ACXY001.0321.00013	GCF_016728825.1	Achromobacter xylosoxidans	6901970	0	0	0
ACXY001.0321.00014	GCF_900009115.1	Achromobacter xylosoxidans	6501194	0	0	0
ACXY001.0321.00015	GCF_900009125.1	Achromobacter xylosoxidans	6626924	1	0	0
ACXY001.0321.00016	GCF_900010105.1	Achromobacter xylosoxidans	6690584	1	0	1
ACXY001.0321.00017	GCF_900475575.1	Achromobacter xylosoxidans	6735421	0	0	0
ACXY001.0321.00018	GCF_000165835.1	Achromobacter xylosoxidans A8	7359146	0	0	0
ADEQ001.0321.00002	GCF_000478885.1	Adlercreutzia equolifaciens DSM 19450	2862526	0	0	0
ADKA001.0321.00001	GCF_000219915.2	Advenella kashmirensis WT001	4423879	0	0	0
ADMI001.0321.00001	GCF_000521505.1	Advenella mimigardefordensis DPN7	4764126	0	0	0
ADRA001.0321.00001	GCF_014075995.1	Adhaeribacter radiodurans	6935613	0	0	1
ADSP001.0321.00001	GCF_011405655.1	Adlercreutzia sp. 8CFCBH1	2908404	0	0	0
ADSW001.0321.00001	GCF_014217805.1	Adhaeribacter swui	6225914	0	0	0
AEAL001.0321.00001	GCF_016026615.1	Aeromonas allosaccharophila	4630407	0	0	0
AECA001.0321.00001	GCF_000591035.1	Aeropyrum camini SY1 = JCM 12091	1595994	0	0	0
AECA002.0321.00001	GCF_000783775.2	Aeromonas caviae	4518310	0	0	0
AECA002.0321.00002	GCF_003294855.2	Aeromonas caviae	4713384	1	0	1
AECA002.0321.00003	GCF_003925855.2	Aeromonas caviae	4826820	1	0	0
AECA002.0321.00004	GCF_007179295.1	Aeromonas caviae	4684096	2	0	0
AECA002.0321.00005	GCF_013487965.1	Aeromonas caviae	4520672	2	0	0
AECA002.0321.00006	GCF_013487985.1	Aeromonas caviae	4527876	1	0	0
AECA002.0321.00007	GCF_013488005.1	Aeromonas caviae	4861894	1	1	0
AECA002.0321.00008	GCF_014158455.1	Aeromonas caviae	4860108	1	1	0
AECA002.0321.00009	GCF_014162015.1	Aeromonas caviae	4352153	0	0	0
AECA002.0321.00010	GCF_014168635.1	Aeromonas caviae	4979818	0	1	1
AECA002.0321.00011	GCF_014169235.1	Aeromonas caviae	4899778	2	0	0
AECA002.0321.00012	GCF_014169675.1	Aeromonas caviae	4826820	1	0	0
AECA002.0321.00016	GCF_016598815.1	Aeromonas caviae	4532165	1	0	0
AECA002.0321.00017	GCF_016728865.1	Aeromonas caviae	4482183	1	0	0
AECA002.0321.00018	GCF_016861425.1	Aeromonas caviae	4928144	3	0	0
AECH001.0321.00001	GCF_001543105.1	Aerococcus christensenii	1634920	0	0	0
AEEN001.0321.00001	GCF_900637545.1	Aeromonas encheleia	4542521	0	0	0
AEER001.0321.00001	GCF_001509405.1	Aeromicrobium erythreum	3629239	0	0	0
AEHY001.0321.00001	GCF_000940915.1	Aeromonas hydrophila	4901389	0	1	0
AEHY001.0321.00003	GCF_001455365.1	Aeromonas hydrophila	5145887	0	0	0
AEHY001.0321.00004	GCF_001518775.1	Aeromonas hydrophila	5275132	0	0	0
AEHY001.0321.00005	GCF_001683535.1	Aeromonas hydrophila	4951765	0	0	0
AEHY001.0321.00006	GCF_001687125.1	Aeromonas hydrophila	5049466	2	0	0
AEHY001.0321.00007	GCF_001895965.1	Aeromonas hydrophila	4783504	2	1	0
AEHY001.0321.00008	GCF_003014775.1	Aeromonas hydrophila	4911246	0	0	0
AEHY001.0321.00009	GCF_003491225.1	Aeromonas hydrophila	5159182	0	0	0
AEHY001.0321.00010	GCF_003491245.1	Aeromonas hydrophila	4955171	2	0	0
AEHY001.0321.00011	GCF_004296435.1	Aeromonas hydrophila	5001549	0	0	0
AEHY001.0321.00012	GCF_004684305.1	Aeromonas hydrophila	5311033	1	1	0
AEHY001.0321.00013	GCF_004684325.1	Aeromonas hydrophila	5282246	1	1	0
AEHY001.0321.00014	GCF_009791455.1	Aeromonas hydrophila	4941513	0	0	0
AEHY001.0321.00015	GCF_011602425.1	Aeromonas hydrophila	5099855	0	0	0
AEHY001.0321.00016	GCF_012273595.1	Aeromonas hydrophila	4573207	0	0	0
AEHY001.0321.00017	GCF_014161955.1	Aeromonas hydrophila	4940097	0	1	0
AEHY001.0321.00018	GCF_014169715.1	Aeromonas hydrophila	5001549	0	0	0
AEHY001.0321.00019	GCF_014679585.1	Aeromonas hydrophila	5445750	2	0	0
AEHY001.0321.00020	GCF_016026875.1	Aeromonas hydrophila	4733702	0	0	0
AEHY001.0321.00022	GCF_002850695.3	Aeromonas hydrophila subsp. hydrophila	5365058	3	0	0
AEHY001.0321.00023	GCF_000014805.1	Aeromonas hydrophila subsp. hydrophila ATCC 7966	4744448	0	0	0
AEHY001.0321.00024	GCF_000401555.1	Aeromonas hydrophila ML09-119	5024500	0	0	0
AEHY001.0321.00026	GCF_001019645.1	Aeromonas hydrophila NJ-35	5279644	0	0	0
AEHY001.0321.00027	GCF_000635955.1	Aeromonas hydrophila pc104A	5023829	0	0	0
AEHY001.0321.00028	GCF_000633175.1	Aeromonas hydrophila AL09-71	5023861	0	0	0
AEHY001.0321.00029	GCF_000819505.1	Aeromonas hydrophila J-1	5000814	0	0	0
AEHY001.0321.00030	GCF_000612075.2	Aeromonas hydrophila YL17	4796281	0	0	0
AEJA001.0321.00001	GCF_016127195.1	Aeromonas jandaei	4551079	0	0	0
AEJA001.0321.00002	GCF_016865345.1	Aeromonas jandaei	4541146	0	0	0
AEME001.0321.00001	GCF_009931135.1	Aeromonas media	5018368	0	0	0
AEME001.0321.00003	GCF_013085725.1	Aeromonas media	4743402	2	0	0
AEME001.0321.00004	GCF_013085745.1	Aeromonas media	4791767	0	0	0
AEME001.0321.00005	GCF_013085765.1	Aeromonas media	4879157	0	0	0
AEME001.0321.00006	GCF_013085785.1	Aeromonas media	5147209	1	0	0
AEME001.0321.00010	GCF_000287215.2	Aeromonas media WS	4788430	0	0	0
AEMU001.0321.00001	GCF_007748035.1	Aeoliella mucimassa	6608792	0	1	0
AEPA001.0321.00001	GCF_002243625.1	Aeribacillus pallidus	4089457	0	0	0
AEPE001.0321.00001	GCF_000011125.1	Aeropyrum pernix K1	1669696	0	0	0
AERI001.0321.00001	GCF_003015165.1	Aeromonas rivipollensis	4508901	0	0	0
AESA001.0321.00001	GCF_001543145.1	Aerococcus sanguinicola	2033849	0	0	0
AESA002.0321.00001	GCF_002180335.1	Aeromonas salmonicida	4935342	0	0	0
AESA002.0321.00002	GCF_002214245.1	Aeromonas salmonicida	5069859	1	0	1
AESA002.0321.00003	GCF_002214265.1	Aeromonas salmonicida	4880825	0	0	0
AESA002.0321.00004	GCF_002214305.1	Aeromonas salmonicida	5082912	2	1	0
AESA002.0321.00005	GCF_002764135.1	Aeromonas salmonicida	4806250	0	2	0
AESA002.0321.00006	GCF_012931585.1	Aeromonas salmonicida	4621725	0	0	0
AESA002.0321.00007	GCF_001643275.2	Aeromonas salmonicida subsp. salmonicida	4897684	0	0	0
AESA002.0321.00008	GCF_008370735.1	Aeromonas salmonicida subsp. salmonicida	5008222	0	1	1
AESA002.0321.00009	GCF_009858115.1	Aeromonas salmonicida subsp. salmonicida	4732829	0	0	0
AESA002.0321.00010	GCF_009858135.1	Aeromonas salmonicida subsp. salmonicida	4690150	0	0	0
AESA002.0321.00011	GCF_002313065.1	Aeromonas salmonicida subsp. masoucida	4917535	0	0	0
AESA002.0321.00012	GCF_014872735.1	Aeromonas salmonicida subsp. masoucida	4982192	0	0	0
AESA002.0321.00013	GCF_000196395.1	Aeromonas salmonicida subsp. salmonicida A449	5040536	0	0	1
AESA002.0321.00014	GCF_003692675.1	Aeromonas salmonicida subsp. salmonicida 01-B526	4736282	0	0	0
AESA002.0321.00015	GCF_002735225.1	Aeromonas salmonicida subsp. pectinolytica 34mel	5012649	0	0	0
AESC001.0321.00001	GCF_001447335.1	Aeromonas schubertii	4400034	0	0	0
AESP001.0321.00001	GCF_002934285.1	Aeromonas sp. ASNIH1	5079402	2	1	0
AESP002.0321.00001	GCF_002934795.1	Aeromonas sp. ASNIH2	4864532	0	0	0
AESP003.0321.00001	GCF_002903405.1	Aeromonas sp. ASNIH3	5033911	2	2	0
AESP004.0321.00001	GCF_002934425.1	Aeromonas sp. ASNIH4	5480196	2	1	0
AESP005.0321.00001	GCF_002902865.1	Aeromonas sp. ASNIH5	4783196	3	0	0
AESP006.0321.00001	GCF_002903485.1	Aeromonas sp. ASNIH7	4868657	2	1	0
AESP007.0321.00001	GCF_002587065.1	Aeromonas sp. CA23	5099209	0	0	0
AESP008.0321.00001	GCF_002586745.1	Aeromonas sp. CU5	4615599	0	0	0
AESP009.0321.00001	GCF_003065605.1	Aeromicrobium sp. 592	3717741	0	0	0
AESP010.0321.00001	GCF_003443875.1	Aeromicrobium sp. A1-2	3446585	0	0	0
AESP011.0321.00001	GCF_004022485.1	Aequorivita sp. H23M31	3682614	0	0	0
AESP013.0321.00001	GCF_013085505.1	Aeromonas sp. 2692-1	5028423	0	0	0
AESP014.0321.00001	GCF_009649075.1	Aeromicrobium sp. MF47	3682026	0	0	0
AESP015.0321.00001	GCF_014334735.1	Aeromicrobium sp. zg-629	3134783	0	0	0
AEUR001.0321.00001	GCF_001543245.1	Aerococcus urinaehominis	1831400	0	0	0
AEUR002.0321.00001	GCF_001543175.1	Aerococcus urinae	1974262	0	0	0
AEUR002.0321.00002	GCF_016026975.1	Aerococcus urinae	1974256	0	0	0
AEUR002.0321.00003	GCF_000193205.1	Aerococcus urinae ACS-120-V-Col10a	2080974	0	0	0
AEUR003.0321.00001	GCF_001518795.1	Aerococcus urinaeequi	2054328	0	0	0
AEUR003.0321.00002	GCF_001543205.1	Aerococcus urinaeequi	2013339	0	0	0
AEUR003.0321.00003	GCF_014931015.1	Aerococcus urinaeequi	2117928	0	0	0
AEVE001.0321.00002	GCF_001634325.1	Aeromonas veronii	4955058	3	0	0
AEVE001.0321.00003	GCF_002803925.1	Aeromonas veronii	4283286	0	1	0
AEVE001.0321.00004	GCF_002803945.1	Aeromonas veronii	4773186	0	0	0
AEVE001.0321.00005	GCF_003491365.1	Aeromonas veronii	4657278	1	0	0
AEVE001.0321.00006	GCF_003722175.1	Aeromonas veronii	4683931	1	0	0
AEVE001.0321.00007	GCF_008693705.1	Aeromonas veronii	4561870	0	0	0
AEVE001.0321.00008	GCF_009755745.1	Aeromonas veronii	4762818	1	0	0
AEVE001.0321.00009	GCF_009834065.1	Aeromonas veronii	4807642	0	0	0
AEVE001.0321.00012	GCF_014168715.1	Aeromonas veronii	4938487	1	1	0
AEVE001.0321.00014	GCF_014169795.1	Aeromonas veronii	4907425	0	0	0
AEVE001.0321.00015	GCF_014169835.1	Aeromonas veronii	4792142	1	1	0
AEVE001.0321.00016	GCF_014169875.1	Aeromonas veronii	4927279	0	1	0
AEVE001.0321.00017	GCF_000204115.1	Aeromonas veronii B565	4551783	0	0	0
AEVE001.0321.00018	GCF_000464515.2	Aeromonas veronii Hm21	4766880	0	0	0
AEVI001.0321.00001	GCF_001543285.1	Aerococcus viridans	2199877	0	0	0
AGAC001.0321.00001	GCF_001594245.1	Aggregatibacter actinomycetemcomitans	2129092	0	0	0
AGAC001.0321.00002	GCF_001594265.1	Aggregatibacter actinomycetemcomitans	2367908	0	0	0
AGAC001.0321.00003	GCF_001690155.1	Aggregatibacter actinomycetemcomitans	2291252	0	0	0
AGAC001.0321.00004	GCF_016026035.1	Aggregatibacter actinomycetemcomitans	2105378	0	0	0
AGAC001.0321.00005	GCF_000604045.1	Aggregatibacter actinomycetemcomitans HK1651	2105503	0	0	0
AGAC001.0321.00006	GCF_000163615.3	Aggregatibacter actinomycetemcomitans D7S-1	2308962	0	0	0
AGAP001.0321.00001	GCF_001262035.1	Aggregatibacter aphrophilus	2414427	0	0	0
AGAP001.0321.00002	GCF_900478265.1	Aggregatibacter aphrophilus	2290909	0	0	0
AGAP001.0321.00003	GCF_000022985.1	Aggregatibacter aphrophilus NJ8700	2313035	0	0	0
AGAP001.0321.00004	GCF_001188835.1	Aggregatibacter aphrophilus NJ8700	2313256	0	0	0
AGAP001.0321.00005	GCF_900636915.1	Aggregatibacter aphrophilus ATCC 33389	2337153	0	0	0
AGAU001.0321.00001	GCF_001660485.1	Agromyces aureus	4373124	0	0	0
AGFA001.0321.00001	GCF_000092025.1	Agrobacterium fabrum str. C58	5674258	0	0	0
AGFA001.0321.00002	GCF_003667725.1	Agrobacterium fabrum	5553114	0	0	0
AGFA001.0321.00003	GCF_003667945.1	Agrobacterium fabrum	5416317	0	0	0
AGFA001.0321.00004	GCF_016599575.1	Agrobacterium fabrum	5563858	0	0	0
AGFA001.0321.00005	GCF_016599595.1	Agrobacterium fabrum	5707130	1	0	0
AGFA001.0321.00006	GCF_016599615.1	Agrobacterium fabrum	5467828	1	0	0
AGFA001.0321.00007	GCF_016864515.1	Agrobacterium fabrum	5500632	2	0	0
AGGI001.0321.00001	GCF_001420915.1	Agarivorans gilvus	4416600	1	0	0
AGLA001.0321.00001	GCF_005145045.1	Agrobacterium larrymoorei	5259126	0	0	0
AGPR001.0321.00001	GCF_004135405.1	Agromyces protaetiae	3683091	0	0	0
AGRA001.0321.00017	GCF_000016265.1	Agrobacterium radiobacter K84	7273300	0	0	0
AGRH001.0321.00001	GCF_002157225.2	Agarilytica rhodophyticola	7113812	0	1	0
AGRH002.0321.00001	GCF_002005205.3	Agrobacterium rhizogenes	5482241	0	0	0
AGRH002.0321.00002	GCF_016864595.1	Agrobacterium rhizogenes	6215524	0	0	0
AGSE001.0321.00001	GCF_016127115.1	Aggregatibacter segnis	2062506	0	0	0
AGSE001.0321.00002	GCF_900476035.1	Aggregatibacter segnis ATCC 33393	2022832	0	0	0
AGSP002.0321.00001	GCF_001713475.1	Agrobacterium sp. RAC06	4964647	0	0	0
AGSP003.0321.00001	GCF_005484985.1	Agrococcus sp. SGAir0287	3084767	0	0	0
AGSP004.0321.00001	GCF_003070885.1	Agromyces sp. MF30-A	3052052	0	0	0
AGSP005.0321.00001	GCF_004006235.1	Agromyces sp. LHK192	4088319	0	0	0
AGSP006.0321.00001	GCF_013365515.1	Agrobacterium sp. CGMCC 11546	5520332	0	0	0
AGSP007.0321.00001	GCF_006970545.1	Agrobacterium sp. T29	5651790	0	0	0
AGSP008.0321.00001	GCF_006337065.1	Agromyces sp. HY052	3437203	0	0	0
AGSP009.0321.00001	GCF_009650195.1	Agrobacterium sp. MA01	5037217	0	0	0
AGSP010.0321.00001	GCF_904528075.1	Agreia sp. COWG	3436992	0	0	0
AGSP011.0321.00001	GCF_000192635.1	Agrobacterium sp. H13-3	5573770	0	0	0
AGTU001.0321.00001	GCF_000971565.1	Agrobacterium tumefaciens	5668655	0	0	0
AGTU001.0321.00002	GCF_002591665.3	Agrobacterium tumefaciens	5720291	0	0	0
AGTU001.0321.00004	GCF_003666425.1	Agrobacterium tumefaciens	5767533	0	0	0
AGTU001.0321.00005	GCF_003666445.1	Agrobacterium tumefaciens	5683743	0	0	0
AGTU001.0321.00006	GCF_003666465.1	Agrobacterium tumefaciens	5870997	0	0	0
AGTU001.0321.00007	GCF_003667905.1	Agrobacterium tumefaciens	5446032	0	0	0
AGTU001.0321.00008	GCF_003667925.1	Agrobacterium tumefaciens	5939134	0	0	0
AGTU001.0321.00010	GCF_005221345.1	Agrobacterium tumefaciens	5996243	0	0	0
AGTU001.0321.00011	GCF_005221385.1	Agrobacterium tumefaciens	5515917	0	0	0
AGTU001.0321.00012	GCF_005221405.1	Agrobacterium tumefaciens	6469646	0	0	0
AGTU001.0321.00013	GCF_005221425.1	Agrobacterium tumefaciens	5526017	0	0	0
AGTU001.0321.00015	GCF_014489975.1	Agrobacterium tumefaciens	5109662	0	0	0
AGTU001.0321.00016	GCF_016403145.1	Agrobacterium tumefaciens	5932670	0	0	0
AGVI001.0321.00001	GCF_013426715.1	Agrobacterium vitis	6223633	0	0	0
AGVI001.0321.00002	GCF_013426735.1	Agrobacterium vitis	5882175	0	0	0
AGVI001.0321.00003	GCF_013427035.1	Agrobacterium vitis	5571018	0	0	0
AHAF001.0321.00001	GCF_003015185.1	Ahniella affigens	6120935	0	3	0
AKGL001.0321.00001	GCF_900097105.1	Akkermansia glycaniphila	3074078	0	0	0
AKMU001.0321.00001	GCF_001688765.2	Akkermansia muciniphila	2745278	0	0	0
AKMU001.0321.00002	GCF_003716915.1	Akkermansia muciniphila	2772237	0	0	0
AKMU001.0321.00003	GCF_003716935.1	Akkermansia muciniphila	2663833	0	0	0
AKMU001.0321.00004	GCF_003716955.1	Akkermansia muciniphila	2664010	0	0	0
AKMU001.0321.00005	GCF_003716975.1	Akkermansia muciniphila	2764211	0	0	0
AKMU001.0321.00006	GCF_004015005.1	Akkermansia muciniphila	2763834	0	0	0
AKMU001.0321.00007	GCF_004015025.1	Akkermansia muciniphila	2764311	0	0	0
AKMU001.0321.00008	GCF_004015045.1	Akkermansia muciniphila	2764297	0	0	0
AKMU001.0321.00009	GCF_004015065.1	Akkermansia muciniphila	2764188	0	0	0
AKMU001.0321.00010	GCF_004015085.1	Akkermansia muciniphila	2770124	0	0	0
AKMU001.0321.00011	GCF_004015105.1	Akkermansia muciniphila	2724248	0	0	0
AKMU001.0321.00012	GCF_004015125.1	Akkermansia muciniphila	2724161	0	0	0
AKMU001.0321.00013	GCF_004015205.1	Akkermansia muciniphila	2770073	0	0	0
AKMU001.0321.00014	GCF_004015225.1	Akkermansia muciniphila	2770146	0	0	0
AKMU001.0321.00015	GCF_004015245.1	Akkermansia muciniphila	2799431	0	0	0
AKMU001.0321.00016	GCF_004015265.1	Akkermansia muciniphila	2824041	0	0	0
AKMU001.0321.00017	GCF_004015285.1	Akkermansia muciniphila	2763965	0	0	0
AKMU001.0321.00018	GCF_004015305.1	Akkermansia muciniphila	2770098	0	0	0
AKMU001.0321.00019	GCF_004015325.1	Akkermansia muciniphila	2724186	0	0	0
AKMU001.0321.00020	GCF_004015345.1	Akkermansia muciniphila	2724154	0	0	0
AKMU001.0321.00021	GCF_004104435.1	Akkermansia muciniphila	2860407	0	0	0
AKMU001.0321.00022	GCF_004319565.1	Akkermansia muciniphila	2801917	0	0	0
AKMU001.0321.00023	GCF_008000975.1	Akkermansia muciniphila	2664043	0	0	0
AKMU001.0321.00024	GCF_009731575.1	Akkermansia muciniphila	2878459	0	0	0
AKMU001.0321.00025	GCF_010223015.1	Akkermansia muciniphila	2734231	0	0	0
AKMU001.0321.00026	GCF_010223075.1	Akkermansia muciniphila	2734254	0	0	0
AKMU001.0321.00027	GCF_010223095.1	Akkermansia muciniphila	2888371	0	0	0
AKMU001.0321.00028	GCF_010223115.1	Akkermansia muciniphila	2888305	0	0	0
AKMU001.0321.00029	GCF_010223135.1	Akkermansia muciniphila	2836174	0	0	0
AKMU001.0321.00030	GCF_010223155.1	Akkermansia muciniphila	2724254	0	0	0
AKMU001.0321.00031	GCF_010223175.1	Akkermansia muciniphila	2724277	0	0	0
AKMU001.0321.00032	GCF_010223195.1	Akkermansia muciniphila	2724300	0	0	0
AKMU001.0321.00033	GCF_010223255.1	Akkermansia muciniphila	2724313	0	0	0
AKMU001.0321.00034	GCF_010223405.1	Akkermansia muciniphila	2836880	0	0	0
AKMU001.0321.00035	GCF_010223575.1	Akkermansia muciniphila	2836855	0	0	0
AKMU001.0321.00036	GCF_010229055.1	Akkermansia muciniphila	2736695	0	0	0
AKMU001.0321.00037	GCF_010229315.1	Akkermansia muciniphila	2810249	0	0	0
AKMU001.0321.00038	GCF_010229495.1	Akkermansia muciniphila	2782478	0	0	0
AKMU001.0321.00039	GCF_010229695.1	Akkermansia muciniphila	2782314	0	0	0
AKMU001.0321.00040	GCF_010229955.1	Akkermansia muciniphila	2782334	0	0	0
AKMU001.0321.00041	GCF_010230155.1	Akkermansia muciniphila	2803530	0	0	0
AKMU001.0321.00042	GCF_010230375.1	Akkermansia muciniphila	3156483	0	0	0
AKMU001.0321.00043	GCF_010230515.1	Akkermansia muciniphila	2844782	0	0	0
AKMU001.0321.00044	GCF_010230725.1	Akkermansia muciniphila	2844797	0	0	0
AKMU001.0321.00045	GCF_010230935.1	Akkermansia muciniphila	2844777	0	0	0
AKMU001.0321.00046	GCF_010231195.1	Akkermansia muciniphila	2844808	0	0	0
AKMU001.0321.00047	GCF_010509235.1	Akkermansia muciniphila	2878261	0	0	0
AKMU001.0321.00048	GCF_014170075.1	Akkermansia muciniphila	3004919	0	0	0
AKMU001.0321.00049	GCF_902387255.1	Akkermansia muciniphila	2762447	0	0	0
AKMU001.0321.00050	GCF_000020225.1	Akkermansia muciniphila ATCC BAA-835	2664102	0	0	0
ALAC001.0321.00001	GCF_000024285.1	Alicyclobacillus acidocaldarius subsp. acidocaldarius DSM 446	3205686	0	0	0
ALAC001.0321.00002	GCF_000219875.1	Alicyclobacillus acidocaldarius subsp. acidocaldarius Tc-4-1	3124048	0	0	0
ALAD001.0321.00001	GCF_001562195.1	Alteromonas addita	4649146	1	4	0
ALAQ001.0321.00001	GCF_003671915.1	Alcaligenes aquatilis	4323879	0	0	0
ALAT001.0321.00001	GCF_001008165.2	Altererythrobacter atlanticus	3475106	0	0	0
ALAU001.0321.00001	GCF_000730385.1	Alteromonas australica	4308833	1	4	0
ALAU001.0321.00002	GCF_000934525.1	Alteromonas australica	4457472	1	0	0
ALBO001.0321.00001	GCF_000009365.1	Alcanivorax borkumensis SK2	3120143	0	2	0
ALCL001.0321.00002	GCF_000737305.2	Alkalihalobacillus clausii	4296341	0	0	0
ALCL001.0321.00003	GCF_002250115.1	Alkalihalobacillus clausii	4517459	0	0	0
ALCO001.0321.00001	GCF_006542665.1	Alistipes communis	3301347	0	0	0
ALCO001.0321.00002	GCF_006542745.1	Alistipes communis	3302129	0	0	0
ALDE001.0321.00001	GCF_012530715.1	Alicycliphilus denitrificans	4770033	0	0	0
ALDE001.0321.00002	GCF_016592015.1	Alicycliphilus denitrificans	4955226	1	1	0
ALDE001.0321.00003	GCF_000179015.2	Alicycliphilus denitrificans BC	4835713	0	0	0
ALDE001.0321.00004	GCF_000204645.1	Alicycliphilus denitrificans K601	5070751	1	0	0
ALDI001.0321.00001	GCF_006542685.1	Alistipes dispar	2962376	0	0	0
ALDI002.0321.00001	GCF_000300005.1	Alcanivorax dieselolei B5	4928223	0	0	0
ALEH001.0321.00001	GCF_000014785.1	Alkalilimnicola ehrlichii MLHE-1	3275944	1	1	0
ALEP001.0321.00001	GCF_001281485.1	Altererythrobacter epoxidivorans	2786256	0	0	0
ALFA001.0321.00001	GCF_013201705.1	Aliarcobacter faecis	2448998	0	2	0
ALFA002.0321.00001	GCF_000967305.2	Alcaligenes faecalis	4248684	0	0	2
ALFA002.0321.00002	GCF_001641975.2	Alcaligenes faecalis	4047508	0	0	0
ALFA002.0321.00003	GCF_002242175.1	Alcaligenes faecalis	4078346	0	0	0
ALFA002.0321.00004	GCF_002443155.1	Alcaligenes faecalis	4075263	0	0	0
ALFA002.0321.00005	GCF_003716855.1	Alcaligenes faecalis	3866803	0	0	0
ALFA002.0321.00006	GCF_003813085.1	Alcaligenes faecalis	4072902	0	0	0
ALFA002.0321.00007	GCF_004319585.1	Alcaligenes faecalis	3922717	1	0	0
ALFA002.0321.00008	GCF_010092625.1	Alcaligenes faecalis	4455940	2	1	0
ALFA002.0321.00009	GCF_016128035.1	Alcaligenes faecalis	4072920	0	0	0
ALFA002.0321.00010	GCF_016446305.1	Alcaligenes faecalis	4029778	0	0	0
ALFA002.0321.00011	GCF_016807785.1	Alcaligenes faecalis	4302351	0	0	0
ALFI001.0321.00001	GCF_014054525.1	Alysiella filiformis	2432079	0	0	0
ALFI002.0321.00001	GCF_000265365.1	Alistipes finegoldii DSM 17242	3734239	0	0	0
ALFI003.0321.00001	GCF_000011805.1	Aliivibrio fischeri ES114	4273718	1	0	0
ALFR001.0321.00001	GCF_012222825.1	Allofrancisella frigidaquae	1674180	0	0	0
ALGU001.0321.00001	GCF_000815225.1	Allofrancisella guangzhouensis	1661527	0	0	0
ALHA001.0321.00001	GCF_005671335.1	Alkalihalobacillus halodurans	4315604	0	0	0
ALIN001.0321.00001	GCF_012222965.1	Allofrancisella inopinata	1750491	0	0	0
ALIN002.0321.00001	GCF_014163495.1	Alistipes indistinctus	3095585	0	0	0
ALIS001.0321.00001	GCF_001663155.1	Altererythrobacter ishigakiensis	2673978	0	0	0
ALKR001.0321.00001	GCF_002109385.1	Alkalihalobacillus krulwichiae	4610863	0	0	0
ALMA001.0321.00001	GCF_003058465.1	Algicoccus marinus	4227194	0	0	0
ALMA002.0321.00002	GCF_001578515.1	Alteromonas macleodii	4801807	1	0	0
ALMA002.0321.00003	GCF_002849875.1	Alteromonas macleodii	4867393	1	3	0
ALMA002.0321.00004	GCF_000172635.2	Alteromonas macleodii ATCC 27126	4653851	0	1	0
ALMA002.0321.00005	GCF_000299995.1	Alteromonas macleodii str. 'Black Sea 11'	4480507	1	1	0
ALMA002.0321.00006	GCF_000300175.1	Alteromonas macleodii str. 'Balearic Sea AD45'	4674885	1	1	0
ALMA002.0321.00007	GCF_000299955.1	Alteromonas macleodii str. 'English Channel 673'	4601785	0	1	0
ALME001.0321.00001	GCF_000016985.1	Alkaliphilus metalliredigens QYMF	4929566	0	0	0
ALME002.0321.00001	GCF_900604385.1	Alistipes megaguti	3270862	0	0	0
ALME003.0321.00001	GCF_001562295.1	Alteromonas mediterranea	4910574	0	2	0
ALME003.0321.00002	GCF_001562315.1	Alteromonas mediterranea	4885197	0	1	0
ALME003.0321.00003	GCF_001886395.1	Alteromonas mediterranea	4927947	1	1	0
ALME003.0321.00004	GCF_001886415.1	Alteromonas mediterranea	4971381	1	1	0
ALME003.0321.00005	GCF_001886435.1	Alteromonas mediterranea	4652214	1	2	0
ALME003.0321.00006	GCF_001886455.1	Alteromonas mediterranea	4344439	1	1	0
ALME003.0321.00007	GCF_006517095.1	Alteromonas mediterranea	4343683	1	1	0
ALME003.0321.00010	GCF_000310085.1	Alteromonas mediterranea DE1	4947126	0	0	0
ALME003.0321.00011	GCF_000439495.1	Alteromonas mediterranea MED64	4397537	1	0	0
ALME003.0321.00012	GCF_000439535.1	Alteromonas mediterranea U7	4442936	1	1	0
ALME003.0321.00013	GCF_000439575.1	Alteromonas mediterranea UM7	4931660	0	1	0
ALME003.0321.00014	GCF_000439595.1	Alteromonas mediterranea UM4b	4438767	0	2	0
ALME003.0321.00015	GCF_000020585.3	Alteromonas mediterranea DE	4480937	1	1	0
ALNA001.0321.00001	GCF_000213655.1	Alteromonas naphthalenivorans	4972148	1	5	0
ALON001.0321.00001	GCF_006542645.1	Alistipes onderdonkii subsp. vulgaris	3507492	0	0	0
ALON001.0321.00002	GCF_006542705.1	Alistipes onderdonkii subsp. vulgaris	3312673	0	0	0
ALON001.0321.00003	GCF_006542725.1	Alistipes onderdonkii subsp. vulgaris	3312682	0	0	0
ALOR001.0321.00001	GCF_000018325.1	Alkaliphilus oremlandii OhILAs	3123558	0	0	0
ALPA001.0321.00001	GCF_000299335.2	Alcanivorax pacificus W11-5	4168427	0	0	0
ALPE001.0321.00001	GCF_002499975.2	Alteromonas pelagimontana	4314189	0	1	0
ALSA002.0321.00001	GCF_003942025.1	Aliivibrio salmonicida	4760779	2	4	0
ALSA002.0321.00002	GCF_000196495.1	Aliivibrio salmonicida LFI1238	4655660	1	2	0
ALSA003.0321.00001	GCF_002201795.1	Alkalitalea saponilacus	4775573	0	0	0
ALSP001.0321.00001	GCF_001010505.1	Alcanivorax sp. NBRC 101098	3095417	1	2	1
ALSP002.0321.00001	GCF_900070365.1	Alloactinosynnema sp. L-07	7405112	0	0	0
ALSP003.0321.00001	GCF_003443615.1	Alteromonas sp. BL110	4458618	1	2	0
ALSP004.0321.00001	GCF_001562125.1	Alteromonas sp. Mac1	4696291	1	4	0
ALSP005.0321.00001	GCF_001886475.1	Alteromonas sp. RW2A1	4143824	1	0	0
ALSP006.0321.00001	GCF_002831605.1	Alteromonas sp. MB-3u-76	4360928	1	0	0
ALSP007.0321.00001	GCF_003569745.1	Altererythrobacter sp. B11	3842046	0	0	0
ALSP008.0321.00001	GCF_003265305.2	Alloprevotella sp. E39	2920169	0	0	0
ALSP009.0321.00001	GCF_003584565.2	Alteromonas sp. RKMC-009	5012246	0	0	0
ALSP010.0321.00001	GCF_900654235.1	Alteromonas sp. 76-1	4857090	1	2	0
ALSP011.0321.00001	GCF_014295415.1	Altibacter sp. ALE3EI	2987299	0	0	0
ALSP012.0321.00001	GCF_011047315.1	Altererythrobacter sp. BO-6	3035715	0	0	0
ALSP013.0321.00001	GCF_016804365.1	Alicyclobacillus sp. TC	2932832	0	0	0
ALSP014.0321.00001	GCF_009557455.1	Alistipes sp. dk3624	3019767	0	0	0
ALSP016.0321.00001	GCF_009796805.1	Algibacter sp. L1A34	4638103	0	0	0
ALSP017.0321.00001	GCF_009796825.1	Algibacter sp. L3A6	4618330	0	0	0
ALSP019.0321.00001	GCF_015767655.1	Alteromonas sp. B31-7	4609080	1	5	0
ALST001.0321.00003	GCF_001632825.1	Alteromonas stellipolaris	4721861	1	3	0
ALST001.0321.00004	GCF_001433715.1	Alteromonas stellipolaris LMG 21856	4686200	1	1	0
ALVI001.0321.00001	GCF_000025485.1	Allochromatium vinosum DSM 180	3669074	0	0	0
ALXE001.0321.00001	GCF_002072815.1	Alcanivorax xenomutans	4733951	0	1	0
AMAL001.0321.00001	GCF_003312875.1	Amycolatopsis albispora	9121443	0	0	0
AMAM001.0321.00001	GCF_001936335.1	Amylolactobacillus amylophilus DSM 20533 = JCM 1125	1610352	0	0	0
AMBU001.0321.00001	GCF_010669305.1	Aminipila butyrica	3334849	0	0	0
AMCO001.0321.00001	GCF_000025885.1	Aminobacterium colombiense DSM 12261	1980592	0	0	0
AMDE001.0321.00001	GCF_000024605.1	Ammonifex degensii KC4	2157067	0	0	0
AMIN001.0321.00001	GCF_010537155.1	Amedibacterium intestinale	2996298	0	0	0
AMIN001.0321.00002	GCF_010537335.1	Amedibacterium intestinale	2488096	0	0	0
AMJA001.0321.00001	GCF_000732925.1	Amycolatopsis japonica	9053857	0	0	0
AMJA002.0321.00001	GCF_016592435.1	Amphritea japonica ATCC BAA-1530	3833046	1	2	0
AMKE001.0321.00001	GCF_000400635.2	Amycolatopsis keratiniphila	8982090	0	0	0
AMME001.0321.00001	GCF_000739085.1	Amycolatopsis methanolica 239	7237391	0	0	0
AMME002.0321.00001	GCF_000220945.1	Amycolatopsis mediterranei S699	10236779	0	0	0
AMME002.0321.00002	GCF_000282715.1	Amycolatopsis mediterranei S699	10246920	0	0	0
AMOR001.0321.00001	GCF_000943515.2	Amycolatopsis orientalis	9490992	0	0	0
AMSP001.0321.00001	GCF_002796545.1	Amycolatopsis sp. AA4	9172799	0	0	0
AMSP002.0321.00001	GCF_002849735.1	Amycolatopsis sp. BJA-103	9488490	0	0	0
AMSP003.0321.00001	GCF_004103735.1	Aminipila sp. JN-18	2750839	0	0	0
AMSP004.0321.00001	GCF_009429145.1	Amycolatopsis sp. YIM 10	10352908	0	0	0
AMSP005.0321.00001	GCF_014250155.1	Aminobacter sp. MDW-2	6607828	0	0	0
AMSP006.0321.00001	GCF_010120715.1	Aminipila sp. CBA3637	3512404	0	0	0
AMSP007.0321.00001	GCF_013364075.1	Amycolatopsis sp. Hca4	10972864	0	0	0
AMSP008.0321.00001	GCF_014353055.1	Amniculibacterium sp. G2-70	2839245	0	0	0
AMSP009.0321.00001	GCF_014843375.1	Aminobacter sp. SR38	7367353	0	0	0
AMSP010.0321.00001	GCF_016889705.1	Amycolatopsis sp. FDAARGOS 1241	9796944	0	0	0
AMSP011.0321.00001	GCF_003063555.1	Aminobacter sp. MSH1	6321606	0	0	0
AMSP011.0321.00002	GCF_003071665.1	Aminobacter sp. MSH1	5763649	0	0	0
AMXY001.0321.00001	GCF_000307165.1	Amphibacillus xylanus NBRC 15112	2569486	0	0	0
ANAG001.0321.00001	GCF_007747655.1	Anatilimnocola aggregata	9007740	0	0	0
ANAM001.0321.00001	GCF_001634285.1	Anoxybacillus amylolyticus	3158269	0	0	0
ANAR001.0321.00001	GCF_007993795.1	Antarcticibacterium arcticum	3409178	0	0	0
ANCA001.0321.00001	GCF_014131675.1	Anaerostipes caccae	3590716	0	0	0
ANCA001.0321.00002	GCF_014467075.1	Anaerostipes caccae	3590719	0	0	0
ANCA002.0321.00001	GCF_015326725.1	Anoxybacillus caldiproteolyticus	3789050	0	0	0
ANCE001.0321.00001	GCF_014218335.1	Anaerocolumna cellulosilytica	5430627	0	0	0
ANCE002.0321.00001	GCF_000024505.1	Anaplasma centrale str. Israel	1206806	0	0	0
ANCY001.0321.00001	GCF_000317695.1	Anabaena cylindrica PCC 7122	7063285	0	0	0
ANDE001.0321.00001	GCF_000013385.1	Anaeromyxobacter dehalogenans 2CP-C	5013479	0	0	0
ANDE001.0321.00002	GCF_000022145.1	Anaeromyxobacter dehalogenans 2CP-1	5029329	0	0	0
ANFE001.0321.00001	GCF_003991135.1	Anoxybacter fermentans	3557532	0	0	0
ANFL001.0321.00001	GCF_006159205.1	Antarcticibacterium flavum	4353683	0	0	0
ANFL002.0321.00001	GCF_002197485.1	Anoxybacillus flavithermus	2830124	0	0	0
ANFL002.0321.00002	GCF_000019045.1	Anoxybacillus flavithermus WK1	2846746	0	0	0
ANGI001.0321.00001	GCF_008033235.1	Anseongella ginsenosidimutans	4322684	0	0	0
ANGO001.0321.00001	GCF_001187595.1	Anoxybacillus gonensis	2803668	0	0	0
ANHA001.0321.00001	GCF_900209925.1	Anaerobutyricum hallii	3515670	0	0	0
ANHA002.0321.00001	GCF_001998765.1	Anaerostipes hadrus	3172613	0	0	0
ANHA002.0321.00002	GCF_902388025.1	Anaerostipes hadrus	3172613	0	0	0
ANHE001.0321.00001	GCF_002237555.1	Antarctobacter heliothermus	5331190	0	0	0
ANIS001.0321.00001	GCF_001866075.3	Anaerobacillus isosaccharinicus	5227144	0	0	0
ANLU001.0321.00001	GCF_002007645.1	Anaerohalosphaera lusitana	4250973	0	0	0
ANMA001.0321.00001	GCF_000011945.1	Anaplasma marginale str. St. Maries	1197687	0	0	0
ANMA001.0321.00002	GCF_000020305.1	Anaplasma marginale str. Florida	1202435	0	0	0
ANME001.0321.00001	GCF_900128415.1	Anaerococcus mediterraneensis	2080215	0	0	0
ANOB001.0321.00001	GCF_016599815.1	Anaerococcus obesiensis	1894618	0	0	0
ANOV001.0321.00001	GCF_002214625.1	Anaplasma ovis str. Haibei	1214674	0	0	0
ANPH001.0321.00001	GCF_000013125.1	Anaplasma phagocytophilum str. HZ	1471282	0	0	0
ANPH001.0321.00002	GCF_000439775.1	Anaplasma phagocytophilum str. JM	1481598	0	0	0
ANPH001.0321.00003	GCF_000439755.1	Anaplasma phagocytophilum str. HZ2	1477581	0	0	0
ANPH001.0321.00004	GCF_013487825.1	Anaplasma phagocytophilum str. Norway variant1	1564418	0	0	0
ANPH001.0321.00005	GCF_000689635.2	Anaplasma phagocytophilum str. Norway variant2	1545197	0	0	0
ANPR001.0321.00001	GCF_010669125.1	Ancylobacter pratisalsi	4778271	0	0	0
ANPR002.0321.00001	GCF_001561955.1	Anaerotignum propionicum DSM 1682	3120417	0	0	0
ANPR003.0321.00001	GCF_000024105.1	Anaerococcus prevotii DSM 20548	1998633	0	0	0
ANSO001.0321.00001	GCF_002355375.1	Aneurinibacillus soli	4116770	0	0	0
ANSP001.0321.00001	GCF_001439585.2	Aneurinibacillus sp. XH2	3664835	0	0	0
ANSP002.0321.00001	GCF_001634265.1	Anoxybacillus sp. B2M1	3819480	0	0	0
ANSP003.0321.00001	GCF_001634305.1	Anoxybacillus sp. B7M1	3869056	0	0	0
ANSP004.0321.00001	GCF_009834045.1	Anoxybacillus sp. PDR2	3791144	0	0	0
ANSP005.0321.00001	GCF_001277295.1	Anabaena sp. WA102	5782034	0	0	0
ANSP006.0321.00001	GCF_009223885.1	Ancylobacter sp. TS-1	3963437	0	0	0
ANSP007.0321.00001	GCF_009498015.1	Anabaena sp. YBS01	7013200	0	0	0
ANSP008.0321.00001	GCF_009931695.1	Anaerocolumna sp. CBA3638	5500435	0	0	0
ANSP009.0321.00001	GCF_015500095.1	Anaerolinea sp. 'rifampicinis'	5631885	0	0	0
ANSP010.0321.00001	GCF_014218355.1	Anaerocolumna sp. CTTW	5621910	0	0	0
ANSP011.0321.00001	GCF_000017505.1	Anaeromyxobacter sp. Fw109-5	5277990	0	0	0
ANSP012.0321.00001	GCF_000020805.1	Anaeromyxobacter sp. K	5061632	0	0	0
ANSP013.0321.00001	GCF_000312705.1	Anabaena sp. 90	5305675	0	0	0
ANTH001.0321.00001	GCF_000199675.1	Anaerolinea thermophila UNI-1	3532378	0	0	0
ANVA001.0321.00001	GCF_016127475.1	Anaerococcus vaginalis	1893964	0	0	0
APBO001.0321.00001	GCF_003627035.1	Apilactobacillus bombintestini	1289211	0	0	0
APKU001.0321.00001	GCF_001314945.1	Apilactobacillus kunkeei	1614522	0	0	0
APRA001.0321.00001	GCF_004014855.1	Apibacter raozihei	3293048	0	0	0
APSP001.0321.00001	GCF_011082725.1	Apibacter sp. B3706	2297680	0	0	0
APSP002.0321.00001	GCF_011082485.1	Apibacter sp. B2966	2315326	0	0	0
AQAE001.0321.00001	GCF_000008625.1	Aquifex aeolicus VF5	1590791	0	0	0
AQDE001.0321.00001	GCF_009856625.1	Aquitalea denitrificans	4502301	0	0	0
AQGI001.0321.00001	GCF_008087625.1	Aquisphaera giovannonii	10526296	1	1	0
AQMA001.0321.00001	GCF_002217795.2	Aquitalea magnusonii	4852135	0	0	0
AQNI001.0321.00001	GCF_003143535.1	Aquirufa nivalisilvae	3116291	0	0	0
AQOL001.0321.00001	GCF_003100395.1	Aquabacterium olei	4256308	0	1	1
AQSI001.0321.00001	GCF_902459485.1	Aquicella siphonis	2833188	0	0	0
AQSP001.0321.00001	GCF_005155025.1	Aquitalea sp. THG-DN7.12	4359891	0	0	0
AQSP002.0321.00001	GCF_004328945.1	Aquitalea sp. USM4	4346160	0	0	0
AQSP003.0321.00001	GCF_003443695.1	Aquimarina sp. AD1	5461560	0	0	0
AQSP004.0321.00001	GCF_003443715.1	Aquimarina sp. AD10	6087890	0	0	0
AQSP005.0321.00001	GCF_003443675.1	Aquimarina sp. BL5	6011237	0	0	0
AQSP006.0321.00001	GCF_002002905.1	Aquaspirillum sp. LM1	3962240	0	3	0
AQSP007.0321.00001	GCF_013365535.1	Aquimarina sp. TRL1	5414780	0	0	0
AQSP008.0321.00001	GCF_012044895.1	Aquisalimonas sp. 2447	3972634	1	0	0
ARAG001.0321.00001	GCF_900631605.1	Arthrobacter agilis	3261460	0	0	0
ARAL001.0321.00001	GCF_002234495.1	Arenibacter algicola	5857781	0	0	0
ARAL002.0321.00001	GCF_000755585.2	Arthrobacter alpinus	4458287	0	0	0
ARAL002.0321.00002	GCF_001294625.1	Arthrobacter alpinus	4046453	0	0	0
ARAL002.0321.00003	GCF_001445575.1	Arthrobacter alpinus	4333648	0	0	0
ARAN001.0321.00001	GCF_006459125.1	Arcobacter anaerophilus	3016922	0	1	0
ARAQ001.0321.00001	GCF_013177635.1	Arcobacter aquimarinus	2520808	0	0	0
ARAR001.0321.00001	GCF_000025965.1	Aromatoleum aromaticum EbN1	4727255	1	1	0
ARBU001.0321.00001	GCF_007005625.1	Arcobacter butzleri	2196900	0	0	0
ARBU001.0321.00002	GCF_900187115.1	Arcobacter butzleri	2347607	0	0	0
ARBU001.0321.00003	GCF_000014025.1	Arcobacter butzleri RM4018	2341251	0	0	0
ARBU001.0321.00004	GCF_005886055.1	Arcobacter butzleri JV22	2297844	0	0	0
ARBU001.0321.00005	GCF_000284355.1	Arcobacter butzleri ED-1	2256675	0	0	0
ARBU001.0321.00006	GCF_000215345.2	Arcobacter butzleri 7h1h	2253233	0	0	0
ARCI001.0321.00001	GCF_013200995.1	Arthrobacter citreus	5467583	0	0	0
ARCI002.0321.00001	GCF_008808035.1	Arcobacter cibarius	2343493	0	0	0
ARCI002.0321.00002	GCF_013372265.1	Arcobacter cibarius	2336659	0	0	0
ARCL001.0321.00001	GCF_013201935.1	Arcobacter cloacae	2810923	0	0	0
ARCR001.0321.00001	GCF_011045415.1	Arcobacter cryaerophilus	2115546	0	1	0
ARCR001.0321.00002	GCF_014301985.1	Arcobacter cryaerophilus	2021348	0	0	0
ARCR001.0321.00003	GCF_014352895.1	Arcobacter cryaerophilus	2054162	0	0	0
ARCR001.0321.00004	GCF_014352915.1	Arcobacter cryaerophilus	2136856	0	0	0
ARCR001.0321.00005	GCF_014352935.1	Arcobacter cryaerophilus	2020388	0	0	0
ARCR001.0321.00006	GCF_003660105.1	Arcobacter cryaerophilus ATCC 43158	2108340	0	1	0
ARCR001.0321.00007	GCF_003660085.1	Arcobacter cryaerophilus D2610	2055914	0	0	0
ARCR002.0321.00001	GCF_002849715.1	Arthrobacter crystallopoietes	5032705	0	0	0
ARDE001.0321.00001	GCF_013201725.1	Arcobacter defluvii	3021240	0	0	0
ARDO001.0321.00001	GCF_003268655.1	Arthrobacter dokdonellae	4530754	0	0	0
AREL001.0321.00001	GCF_003544915.1	Arcobacter ellisii	2799949	0	0	0
AREN001.0321.00001	GCF_013460135.1	Arsenophonus endosymbiont of Aphis craccivora	2424437	0	0	0
AREN002.0321.00001	GCF_900343015.1	Arsenophonus endosymbiont of Aleurodicus dispersus	663125	0	0	0
ARFU001.0321.00001	GCF_000008665.1	Archaeoglobus fulgidus DSM 4304	2178400	0	0	0
ARFU001.0321.00002	GCF_000734035.1	Archaeoglobus fulgidus DSM 8774	2316287	0	0	0
ARGE001.0321.00001	GCF_001027285.1	Archangium gephyra	12489432	0	0	0
ARGI001.0321.00001	GCF_007971385.1	Arachidicoccus ginsenosidivorans	5773153	0	0	0
ARHA001.0321.00001	GCF_900475915.1	Arcanobacterium haemolyticum	1988850	0	0	0
ARHA001.0321.00002	GCF_000092365.1	Arcanobacterium haemolyticum DSM 20595	1986154	0	0	0
ARLA001.0321.00001	GCF_013201625.1	Arcobacter lanthieri	2276457	0	0	0
ARLU001.0321.00001	GCF_003258705.1	Arcticibacterium luteifluviistationis	5379839	0	0	0
ARNA001.0321.00001	GCF_004768525.1	Arsenophonus nasoniae	4987107	0	0	0
ARNI001.0321.00001	GCF_000092245.1	Arcobacter nitrofigilis DSM 7299	3192235	0	1	0
ARPH001.0321.00001	GCF_016904675.1	Arcanobacterium phocisimile	1988065	0	0	0
ARPO001.0321.00001	GCF_004299785.2	[Arcobacter] porcinus	2018219	0	0	0
ARPR001.0321.00001	GCF_000025285.1	Archaeoglobus profundus DSM 5631	1563423	0	0	0
ARSK001.0321.00001	GCF_003939045.1	Arcobacter skirrowii	1877752	0	0	0
ARSK001.0321.00002	GCF_003544835.1	Arcobacter skirrowii CCUG 10374	1969846	0	1	0
ARSO001.0321.00001	GCF_003600625.1	Arachidicoccus soli	4099663	0	0	0
ARSP001.0321.00001	GCF_000294695.2	Arthrobacter sp. Rue61a	5081038	0	0	0
ARSP002.0321.00001	GCF_001969265.1	Arthrobacter sp. QXT-31	5041568	0	0	0
ARSP003.0321.00001	GCF_016745315.1	Arthrospira sp. PCC 9108	6763964	0	0	0
ARSP004.0321.00001	GCF_000785535.1	Arthrobacter sp. PAMC 25486	4593579	0	0	0
ARSP005.0321.00001	GCF_001454985.1	Arthrobacter sp. YC-RL1	4018639	0	0	0
ARSP006.0321.00001	GCF_001189535.1	Arsenicicoccus sp. oral taxon 190	3525271	0	0	0
ARSP007.0321.00001	GCF_001281315.1	Arthrobacter sp. ERGS1:01	4936686	0	0	0
ARSP008.0321.00001	GCF_001854365.1	Arthrobacter sp. ZXY-2	5058708	0	0	0
ARSP009.0321.00001	GCF_001750145.1	Arthrobacter sp. U41	4792631	0	0	0
ARSP010.0321.00001	GCF_001659705.1	Arachidicoccus sp. BS20	3492500	0	0	0
ARSP011.0321.00001	GCF_002224285.1	Arthrobacter sp. YN	5063552	0	0	0
ARSP012.0321.00001	GCF_002953935.1	Arthrobacter sp. PGP41	4270237	0	0	0
ARSP013.0321.00001	GCF_009707285.1	Arthrobacter sp. AQ5-05	3996248	0	0	0
ARSP014.0321.00001	GCF_004337365.2	Arachidicoccus sp. B3-10	4701441	0	0	0
ARSP015.0321.00001	GCF_004798705.1	Arthrobacter sp. PAMC25564	4170970	0	0	0
ARSP016.0321.00001	GCF_005280255.1	Arthrobacter sp. 24S4-2	5563753	0	0	0
ARSP017.0321.00001	GCF_005937985.2	Arthrobacter sp. KBS0702	3649547	0	0	0
ARSP018.0321.00001	GCF_007858535.1	Arthrobacter sp. UKPF54-2	3517818	0	0	0
ARSP019.0321.00001	GCF_012563545.1	Arcanobacterium sp. 2701	1941174	0	0	0
ARSP020.0321.00001	GCF_014041995.1	Arcanobacterium sp. JY-X040	2661583	0	0	0
ARSP021.0321.00001	GCF_001580405.1	Arthrobacter sp. SLBN-53	5421338	0	0	0
ARSP022.0321.00001	GCF_014863565.1	Arthrobacter sp. TES	4786524	0	0	0
ARSP023.0321.00001	GCF_000196235.1	Arthrobacter sp. FB24	5070478	0	0	0
ARSP024.0321.00001	GCF_013201035.1	Arthrobacter sp. NEB 688	4077299	0	0	0
ARSU001.0321.00001	GCF_003544815.1	Arcobacter suis CECT 7833	2639269	0	0	0
ARSU002.0321.00001	GCF_000385565.1	Archaeoglobus sulfaticallidus PM70-1	2076931	0	0	0
ARTH001.0321.00001	GCF_004214815.1	Arcobacter thereius LMG 24486	1915080	0	0	0
ARTR001.0321.00001	GCF_003355515.1	Arcobacter trophiarum LMG 25534	1915613	0	0	0
ARVE001.0321.00001	GCF_013201665.1	Arcobacter venerupis	3209085	0	0	0
ARVE002.0321.00001	GCF_000194625.1	Archaeoglobus veneficus SNP6	1901943	0	0	0
ARVI001.0321.00001	GCF_016859125.1	Archangium violaceum	12677854	0	0	0
ARVI001.0321.00002	GCF_016887565.1	Archangium violaceum	13213980	0	0	0
ASBO001.0321.00001	GCF_001547995.1	Asaia bogorensis NBRC 16594	3198265	0	0	0
ASCE001.0321.00001	GCF_016865385.1	Asaccharobacter celatus DSM 18785	2929991	0	0	0
ASEX001.0321.00001	GCF_003966695.1	Asticcacaulis excentricus	3793195	0	0	0
ASEX001.0321.00002	GCF_000175215.2	Asticcacaulis excentricus CB 48	4308776	0	0	0
ASYE001.0321.00001	GCF_000012225.1	Aster yellows witches'-broom phytoplasma AYWB	723970	0	0	0
ATHE001.0321.00001	GCF_008064855.1	Atlantibacter hermannii	4315318	0	0	0
ATHE001.0321.00002	GCF_011068345.1	Atlantibacter hermannii	4483592	0	0	0
ATHE001.0321.00003	GCF_016027855.1	Atlantibacter hermannii	4554875	0	0	0
ATPA001.0321.00001	GCF_000024225.1	Atopobium parvulum DSM 20469	1543805	0	0	0
ATSA001.0321.00001	GCF_009936215.1	Athalassotoga saccharophila	2044999	0	0	0
AUAL001.0321.00001	GCF_014844055.1	Aureimonas altamirensis	4181223	0	0	0
AUAT001.0321.00001	GCF_001077815.2	Aurantiacibacter atlanticus	3226359	0	0	0
AUCH001.0321.00001	GCF_003391095.1	Austwickia chelonae	3631970	0	0	0
AUGA001.0321.00001	GCF_001886695.1	Aurantiacibacter gangjinensis	2724951	0	0	0
AUHE001.0321.00001	GCF_007752135.1	Aureliella helgolandensis	8439957	0	3	1
AUMI001.0321.00001	GCF_002355535.1	Aurantimicrobium minutum	1622386	0	0	0
AUSP001.0321.00001	GCF_001442755.1	Aureimonas sp. AU20	5210858	0	0	0
AUSP002.0321.00001	GCF_003194085.1	Aurantimicrobium sp. MWH-Mo1	1748063	0	0	0
AUSP003.0321.00001	GCF_003325955.1	Aurantimicrobium sp. MWH-Uga1	1609479	0	0	0
AUSP004.0321.00001	GCF_002966125.1	Aureitalea sp. RR4-38	3182272	0	0	0
AUSP005.0321.00001	GCF_003185725.2	Auritidibacter sp. NML130574	2656163	0	0	0
AUSP006.0321.00001	GCF_014058705.1	Aureimonas sp. LMG 31693	3485124	0	0	0
AVPA001.0321.00001	GCF_000969315.2	Avibacterium paragallinarum	2532404	0	0	0
AVPA001.0321.00002	GCF_003864155.1	Avibacterium paragallinarum	2425949	0	0	0
AVPA001.0321.00003	GCF_011765605.1	Avibacterium paragallinarum	2521134	0	0	0
AVPA001.0321.00004	GCF_012849875.1	Avibacterium paragallinarum	2415699	0	0	0
AVPA001.0321.00005	GCF_012850075.1	Avibacterium paragallinarum	2415855	0	0	0
AVPA001.0321.00006	GCF_012850275.1	Avibacterium paragallinarum	2415950	0	0	0
AVPA001.0321.00007	GCF_012850455.1	Avibacterium paragallinarum	2415552	0	0	0
AVPA001.0321.00008	GCF_012850655.1	Avibacterium paragallinarum	2415993	0	0	0
AVPA001.0321.00009	GCF_012850815.1	Avibacterium paragallinarum	2416187	0	0	0
AVPA001.0321.00010	GCF_012850955.1	Avibacterium paragallinarum	2415542	0	0	0
AVVO001.0321.00001	GCF_900635775.1	Avibacterium volantium	2230476	0	0	0
AZBR001.0321.00001	GCF_000632475.1	Azospirillum brasilense	7391279	0	0	0
AZBR001.0321.00002	GCF_001315015.1	Azospirillum brasilense	6587527	0	0	0
AZBR001.0321.00003	GCF_005222145.1	Azospirillum brasilense	7134170	0	0	0
AZBR001.0321.00004	GCF_005222165.1	Azospirillum brasilense	7928656	0	0	0
AZBR001.0321.00005	GCF_005222205.1	Azospirillum brasilense	7196248	0	0	0
AZBR001.0321.00006	GCF_008274945.1	Azospirillum brasilense	7100241	0	0	0
AZBR001.0321.00007	GCF_008274965.1	Azospirillum brasilense	7441087	0	0	0
AZCA001.0321.00001	GCF_000010525.1	Azorhizobium caulinodans ORS 571	5369772	0	0	0
AZCH001.0321.00001	GCF_002220155.1	Azotobacter chroococcum	5023055	0	1	0
AZCH001.0321.00002	GCF_016406165.1	Azotobacter chroococcum	5075724	0	2	0
AZCH001.0321.00003	GCF_000817975.1	Azotobacter chroococcum NCIMB 8003	5192286	0	1	0
AZCO001.0321.00001	GCF_003111645.1	Azoarcus communis	4572081	1	0	0
AZCO001.0321.00002	GCF_003111665.1	Azoarcus communis	4886933	0	1	0
AZLI001.0321.00002	GCF_000283655.1	Azospirillum lipoferum 4B	6846400	0	0	0
AZOL001.0321.00001	GCF_000061505.1	Azoarcus olearius	4376040	0	1	0
AZOL001.0321.00002	GCF_001682385.1	Azoarcus olearius	4451751	0	3	0
AZOR001.0321.00001	GCF_000236665.1	Azospira oryzae PS	3806980	0	3	0
AZOR002.0321.00001	GCF_013347285.1	Azospirillum oryzae	6809363	0	0	0
AZPU001.0321.00001	GCF_002872475.1	Azoarcus pumilus	3225512	0	1	0
AZRA001.0321.00001	GCF_003233655.1	Azospirillum ramasamyi	6316263	0	0	0
AZRE001.0321.00001	GCF_016858125.1	Azospira restricta	3975213	0	0	1
AZSA001.0321.00001	GCF_009363155.1	Azotobacter salinestris	5292366	1	0	0
AZSP001.0321.00001	GCF_009177135.1	Azospira sp. I09	4167394	0	4	0
AZSP002.0321.00001	GCF_000010725.1	Azospirillum sp. B510	7599738	0	0	0
AZSP003.0321.00001	GCF_001190925.1	Azoarcus sp. CIB	5257030	1	0	0
AZSP004.0321.00001	GCF_010983895.1	Azoarcus sp. M9-3-2	4236644	1	1	0
AZSP005.0321.00001	GCF_006496635.1	Azoarcus sp. DD4	5400077	1	1	0
AZSP006.0321.00001	GCF_003628555.1	Azoarcus sp. DN11	4956835	0	1	1
AZSP007.0321.00001	GCF_004923295.1	Azospirillum sp. TSH100	7166382	0	0	0
AZSP008.0321.00001	GCF_003119115.1	Azospirillum sp. TSH58	7244074	0	0	0
AZSP009.0321.00001	GCF_004923315.1	Azospirillum sp. TSA2s	8102478	0	0	0
AZSP010.0321.00001	GCF_000349945.1	Azoarcus sp. KH32C	5818755	1	0	0
AZTH001.0321.00001	GCF_003130795.1	Azospirillum thermophilum	6776313	0	0	0
AZTH002.0321.00001	GCF_001305595.1	Azospirillum thiophilum	7609458	0	0	0
AZVI001.0321.00001	GCF_000021045.1	Azotobacter vinelandii DJ	5365318	0	0	0
AZVI001.0321.00002	GCF_000380335.1	Azotobacter vinelandii CA	5366370	0	0	0
AZVI001.0321.00003	GCF_000380365.1	Azotobacter vinelandii CA6	5323210	0	0	0
BAAE001.0321.00001	GCF_004101925.1	Bacillus aerophilus	3829464	0	0	0
BAAL001.0321.00001	GCF_009740005.1	Bacillus albus	5855605	0	0	0
BAAL002.0321.00001	GCF_000299555.2	Bacillus altitudinis	3755709	0	0	0
BAAL002.0321.00002	GCF_000972685.1	Bacillus altitudinis	3745123	0	0	0
BAAL002.0321.00003	GCF_001191605.1	Bacillus altitudinis	3681784	0	0	0
BAAL002.0321.00004	GCF_001431145.1	Bacillus altitudinis	3793419	0	0	0
BAAL002.0321.00005	GCF_001431785.1	Bacillus altitudinis	3787818	0	0	0
BAAL002.0321.00006	GCF_001700735.1	Bacillus altitudinis	3792999	0	0	0
BAAL002.0321.00007	GCF_001908475.1	Bacillus altitudinis	3740896	0	0	0
BAAL002.0321.00008	GCF_002443015.2	Bacillus altitudinis	3844795	0	0	0
BAAL002.0321.00009	GCF_002741745.1	Bacillus altitudinis	3765752	0	0	0
BAAL002.0321.00010	GCF_004563755.2	Bacillus altitudinis	3867833	0	0	0
BAAL002.0321.00011	GCF_005849435.1	Bacillus altitudinis	3891368	0	0	0
BAAL002.0321.00012	GCF_006007905.1	Bacillus altitudinis	3716092	0	0	0
BAAL002.0321.00013	GCF_013283915.1	Bacillus altitudinis	3879167	0	0	0
BAAL002.0321.00014	GCF_013307105.1	Bacillus altitudinis	3755707	0	0	0
BAAL002.0321.00015	GCF_015160895.1	Bacillus altitudinis	3763717	0	0	0
BAAL002.0321.00016	GCF_015689015.1	Bacillus altitudinis	3718493	0	0	0
BAAL002.0321.00017	GCF_016767855.1	Bacillus altitudinis	3741767	0	0	0
BAAL002.0321.00018	GCF_016807685.1	Bacillus altitudinis	3781168	0	0	0
BAAL002.0321.00019	GCF_017161205.1	Bacillus altitudinis	3729040	0	0	0
BAAL003.0321.00001	GCF_013388295.1	Bartonella alsatica	1659117	0	0	0
BAAM001.0321.00001	GCF_001483885.1	Bacillus amyloliquefaciens	3979925	0	0	0
BAAM001.0321.00002	GCF_001586105.1	Bacillus amyloliquefaciens	3935930	0	0	0
BAAM001.0321.00003	GCF_001596755.1	Bacillus amyloliquefaciens	4006754	0	0	0
BAAM001.0321.00004	GCF_001705195.1	Bacillus amyloliquefaciens	3688209	0	0	0
BAAM001.0321.00005	GCF_001874385.1	Bacillus amyloliquefaciens	3957164	0	0	0
BAAM001.0321.00006	GCF_001889285.1	Bacillus amyloliquefaciens	3989393	0	0	0
BAAM001.0321.00007	GCF_001922005.1	Bacillus amyloliquefaciens	3929787	0	0	0
BAAM001.0321.00008	GCF_002173635.1	Bacillus amyloliquefaciens	4088240	0	0	0
BAAM001.0321.00009	GCF_002209305.1	Bacillus amyloliquefaciens	3897521	0	0	0
BAAM001.0321.00010	GCF_003149695.1	Bacillus amyloliquefaciens	4046611	0	0	0
BAAM001.0321.00011	GCF_003149715.1	Bacillus amyloliquefaciens	4041665	0	0	0
BAAM001.0321.00012	GCF_003149795.1	Bacillus amyloliquefaciens	3982905	0	0	0
BAAM001.0321.00013	GCF_003312895.1	Bacillus amyloliquefaciens	4103824	0	0	0
BAAM001.0321.00014	GCF_003868675.1	Bacillus amyloliquefaciens	4009619	0	0	0
BAAM001.0321.00015	GCF_004006115.1	Bacillus amyloliquefaciens	4002836	0	0	0
BAAM001.0321.00016	GCF_004421045.1	Bacillus amyloliquefaciens	4240930	0	0	0
BAAM001.0321.00017	GCF_007362635.1	Bacillus amyloliquefaciens	4064151	0	0	0
BAAM001.0321.00018	GCF_007827165.1	Bacillus amyloliquefaciens	3954391	0	0	0
BAAM001.0321.00019	GCF_007923205.1	Bacillus amyloliquefaciens	3952640	0	0	0
BAAM001.0321.00020	GCF_008534375.1	Bacillus amyloliquefaciens	3993985	0	0	0
BAAM001.0321.00021	GCF_008808015.1	Bacillus amyloliquefaciens	3904474	0	0	0
BAAM001.0321.00022	GCF_008824205.1	Bacillus amyloliquefaciens	4118763	0	0	0
BAAM001.0321.00023	GCF_013122255.1	Bacillus amyloliquefaciens	4026648	0	0	0
BAAM001.0321.00024	GCF_013328835.1	Bacillus amyloliquefaciens	4006790	0	0	0
BAAM001.0321.00025	GCF_013341255.1	Bacillus amyloliquefaciens	4010543	0	0	0
BAAM001.0321.00026	GCF_014622745.1	Bacillus amyloliquefaciens	4036119	0	0	0
BAAM001.0321.00027	GCF_014791945.1	Bacillus amyloliquefaciens	4023066	0	0	0
BAAM001.0321.00028	GCF_014792065.1	Bacillus amyloliquefaciens	3964430	0	0	0
BAAM001.0321.00029	GCF_014854735.1	Bacillus amyloliquefaciens	4037030	0	0	0
BAAM001.0321.00030	GCF_014930895.1	Bacillus amyloliquefaciens	3847565	0	0	0
BAAM001.0321.00031	GCF_015999565.1	Bacillus amyloliquefaciens	3915550	0	0	0
BAAM001.0321.00032	GCF_000196735.1	Bacillus amyloliquefaciens DSM 7 = ATCC 23350	3980199	0	0	0
BAAM001.0321.00033	GCF_000195515.1	Bacillus amyloliquefaciens TA208	3937511	0	0	0
BAAM001.0321.00034	GCF_000204275.1	Bacillus amyloliquefaciens LL3	4001985	0	0	0
BAAM001.0321.00035	GCF_000221645.1	Bacillus amyloliquefaciens XH7	3939203	0	0	0
BAAM001.0321.00036	GCF_000242855.2	Bacillus amyloliquefaciens IT-45	3936866	0	0	0
BAAM001.0321.00037	GCF_000262385.1	Bacillus amyloliquefaciens Y2	4238624	0	0	0
BAAM001.0321.00038	GCF_000835145.1	Bacillus amyloliquefaciens KHG19	3953361	0	0	0
BAAM001.0321.00039	GCF_001593765.1	Bacillus amyloliquefaciens UMAF6639	4034636	0	0	0
BAAM001.0321.00040	GCF_000494835.1	Bacillus amyloliquefaciens CC178	3916828	0	0	0
BAAM001.0321.00041	GCF_000508265.1	Bacillus amyloliquefaciens LFB112	3942754	0	0	0
BAAM001.0321.00042	GCF_001593785.1	Bacillus amyloliquefaciens UMAF6614	4005145	0	0	0
BAAN001.0321.00001	GCF_001281405.1	Bartonella ancashensis	1467695	0	0	0
BAAN002.0321.00001	GCF_000534935.2	Bacillus anthracis	5495687	0	0	0
BAAN002.0321.00002	GCF_000725325.1	Bacillus anthracis	5490124	0	0	0
BAAN002.0321.00003	GCF_000742655.1	Bacillus anthracis	5331737	0	0	0
BAAN002.0321.00004	GCF_000832425.1	Bacillus anthracis	5403381	0	0	0
BAAN002.0321.00005	GCF_000832445.1	Bacillus anthracis	5506626	0	0	0
BAAN002.0321.00006	GCF_000832465.1	Bacillus anthracis	5504993	0	0	0
BAAN002.0321.00007	GCF_000832505.1	Bacillus anthracis	5498337	0	0	0
BAAN002.0321.00008	GCF_000832565.1	Bacillus anthracis	5505665	0	0	0
BAAN002.0321.00009	GCF_000832585.1	Bacillus anthracis	5294803	0	0	0
BAAN002.0321.00010	GCF_000832665.1	Bacillus anthracis	5491185	0	0	0
BAAN002.0321.00011	GCF_000832725.1	Bacillus anthracis	5487255	0	0	0
BAAN002.0321.00012	GCF_000832745.1	Bacillus anthracis	5489869	0	0	0
BAAN002.0321.00013	GCF_000832965.1	Bacillus anthracis	5601083	0	0	0
BAAN002.0321.00014	GCF_000833065.1	Bacillus anthracis	5503972	0	0	0
BAAN002.0321.00015	GCF_000833125.1	Bacillus anthracis	5505775	0	0	0
BAAN002.0321.00016	GCF_000875715.1	Bacillus anthracis	5477055	0	0	0
BAAN002.0321.00017	GCF_001543225.1	Bacillus anthracis	5503446	0	0	0
BAAN002.0321.00018	GCF_001654475.1	Bacillus anthracis	5503799	0	0	0
BAAN002.0321.00019	GCF_001683065.1	Bacillus anthracis	5227092	0	0	0
BAAN002.0321.00020	GCF_001683095.1	Bacillus anthracis	5228660	0	0	0
BAAN002.0321.00021	GCF_001683135.1	Bacillus anthracis	5228656	0	0	0
BAAN002.0321.00022	GCF_001683155.1	Bacillus anthracis	5228657	0	0	0
BAAN002.0321.00023	GCF_001683175.1	Bacillus anthracis	5228658	0	0	0
BAAN002.0321.00024	GCF_001683195.1	Bacillus anthracis	5228656	0	0	0
BAAN002.0321.00025	GCF_001683215.1	Bacillus anthracis	5227094	0	0	0
BAAN002.0321.00026	GCF_001683235.1	Bacillus anthracis	5227091	0	0	0
BAAN002.0321.00027	GCF_001683255.1	Bacillus anthracis	5227060	0	0	0
BAAN002.0321.00028	GCF_001683275.1	Bacillus anthracis	5227090	0	0	0
BAAN002.0321.00029	GCF_001683295.1	Bacillus anthracis	5227079	0	0	0
BAAN002.0321.00030	GCF_001936375.1	Bacillus anthracis	5504043	0	0	0
BAAN002.0321.00031	GCF_001990245.1	Bacillus anthracis	5410351	0	0	0
BAAN002.0321.00032	GCF_002208785.1	Bacillus anthracis	5410440	0	0	0
BAAN002.0321.00033	GCF_002277915.1	Bacillus anthracis	5546495	0	0	0
BAAN002.0321.00034	GCF_002356575.1	Bacillus anthracis	5504652	0	0	0
BAAN002.0321.00035	GCF_002980615.3	Bacillus anthracis	5229731	0	0	0
BAAN002.0321.00036	GCF_003227955.1	Bacillus anthracis	5504232	0	0	0
BAAN002.0321.00037	GCF_003410255.1	Bacillus anthracis	5231857	0	0	0
BAAN002.0321.00038	GCF_003410355.1	Bacillus anthracis	5372893	0	0	0
BAAN002.0321.00039	GCF_004328845.1	Bacillus anthracis	5294779	0	0	0
BAAN002.0321.00040	GCF_006088855.1	Bacillus anthracis	5490165	0	0	0
BAAN002.0321.00041	GCF_006742565.1	Bacillus anthracis	5486226	0	0	0
BAAN002.0321.00042	GCF_009806595.1	Bacillus anthracis	5225746	0	0	0
BAAN002.0321.00043	GCF_009806615.1	Bacillus anthracis	5227419	0	0	0
BAAN002.0321.00044	GCF_009806635.1	Bacillus anthracis	5232133	0	0	0
BAAN002.0321.00045	GCF_009806655.1	Bacillus anthracis	5228748	0	0	0
BAAN002.0321.00046	GCF_009806675.1	Bacillus anthracis	5231644	0	0	0
BAAN002.0321.00047	GCF_009806695.1	Bacillus anthracis	5227450	0	0	0
BAAN002.0321.00048	GCF_000007845.1	Bacillus anthracis str. Ames	5227293	0	0	0
BAAN002.0321.00049	GCF_000008165.1	Bacillus anthracis str. Sterne	5228663	0	0	0
BAAN002.0321.00050	GCF_000832635.1	Bacillus anthracis str. Sterne	5409120	0	0	0
BAAN002.0321.00051	GCF_000742895.1	Bacillus anthracis str. Vollum	5506189	0	0	0
BAAN002.0321.00052	GCF_000008445.1	Bacillus anthracis str. 'Ames Ancestor'	5503926	0	0	0
BAAN002.0321.00053	GCF_000021445.1	Bacillus anthracis str. CDC 684	5506763	0	0	0
BAAN002.0321.00054	GCF_000022865.1	Bacillus anthracis str. A0248	5503926	0	0	0
BAAN002.0321.00055	GCF_000512775.2	Bacillus anthracis str. A16R	5410560	0	0	0
BAAN002.0321.00056	GCF_000512835.2	Bacillus anthracis str. A16	5505446	0	0	0
BAAN002.0321.00057	GCF_000258885.1	Bacillus anthracis str. H9401	5495471	0	0	0
BAAN002.0321.00058	GCF_000295695.2	Bacillus anthracis str. BF1	5490208	0	0	0
BAAN002.0321.00059	GCF_000583105.1	Bacillus anthracis str. SVA11	5487517	0	0	0
BAAN002.0321.00060	GCF_000832785.1	Bacillus anthracis str. V770-NP-1R	5410397	0	0	0
BAAN002.0321.00061	GCF_000833275.1	Bacillus anthracis str. Turkey32	5505298	0	0	0
BAAP001.0321.00001	GCF_002007485.1	Bartonella apis	2601172	0	0	0
BAAP001.0321.00002	GCF_002007505.1	Bartonella apis	2643257	0	0	0
BAAP001.0321.00003	GCF_002007565.1	Bartonella apis	2907212	0	0	0
BAAT001.0321.00001	GCF_002173495.1	Bacillus atrophaeus	4180819	0	0	0
BAAT001.0321.00002	GCF_002243495.1	Bacillus atrophaeus	4325818	0	0	0
BAAT001.0321.00003	GCF_002688645.1	Bacillus atrophaeus	4258149	0	0	0
BAAT001.0321.00004	GCF_000165925.1	Bacillus atrophaeus 1942	4168266	0	0	0
BAAU001.0321.00001	GCF_000341355.1	Bartonella australis Aust/NH1	1596490	0	0	0
BABA001.0321.00001	GCF_001559035.2	Bartonella bacilliformis	1443410	0	0	0
BABA001.0321.00002	GCF_009498695.1	Bartonella bacilliformis	1411655	0	0	0
BABA001.0321.00003	GCF_000015445.1	Bartonella bacilliformis KC583	1445021	0	0	0
BABE001.0321.00001	GCF_001721685.1	Bacillus beveridgei	3582268	0	0	0
BABO001.0321.00001	GCF_000831065.1	Bacillus bombysepticus str. Wang	5873592	0	0	0
BACA001.0321.00001	GCF_003595605.1	[Bacillus] caldolyticus	3485582	0	0	0
BACA002.0321.00001	GCF_001688725.2	Bacteroides caecimuris	4839927	0	0	0
BACA003.0321.00001	GCF_002222615.2	Bacteroides caccae	4570803	0	0	0
BACA003.0321.00002	GCF_016726305.1	Bacteroides caccae	4570941	0	0	0
BACA003.0321.00003	GCF_016889745.1	Bacteroides caccae	4570957	0	0	0
BACE001.0321.00001	GCF_000635895.2	Bacillus cereus	5734615	0	0	0
BACE001.0321.00002	GCF_000789315.1	Bacillus cereus	5718945	0	0	0
BACE001.0321.00003	GCF_000832525.1	Bacillus cereus	5697763	0	0	0
BACE001.0321.00004	GCF_000832765.1	Bacillus cereus	5642300	0	0	0
BACE001.0321.00005	GCF_000835185.1	Bacillus cereus	5642468	0	0	0
BACE001.0321.00006	GCF_000978375.1	Bacillus cereus	5349617	0	0	0
BACE001.0321.00007	GCF_001277915.1	Bacillus cereus	5398511	0	0	0
BACE001.0321.00008	GCF_001518875.1	Bacillus cereus	5678662	0	0	0
BACE001.0321.00009	GCF_001635915.1	Bacillus cereus	6112892	0	0	0
BACE001.0321.00010	GCF_001635955.1	Bacillus cereus	6097988	0	0	0
BACE001.0321.00011	GCF_001635995.1	Bacillus cereus	5980834	0	0	0
BACE001.0321.00012	GCF_001721145.1	Bacillus cereus	5430118	0	0	0
BACE001.0321.00013	GCF_001880305.1	Bacillus cereus	5671798	0	0	0
BACE001.0321.00014	GCF_001941885.1	Bacillus cereus	5341010	0	0	0
BACE001.0321.00015	GCF_001941905.1	Bacillus cereus	5340399	0	0	0
BACE001.0321.00016	GCF_001941925.1	Bacillus cereus	5324171	0	0	0
BACE001.0321.00017	GCF_002000005.1	Bacillus cereus	5373294	0	0	0
BACE001.0321.00018	GCF_002214705.1	Bacillus cereus	5369104	0	0	0
BACE001.0321.00019	GCF_002214725.1	Bacillus cereus	5448353	0	0	0
BACE001.0321.00020	GCF_002214765.1	Bacillus cereus	5358595	0	0	0
BACE001.0321.00021	GCF_002215175.1	Bacillus cereus	5721108	0	0	0
BACE001.0321.00022	GCF_002216125.1	Bacillus cereus	5600741	0	0	0
BACE001.0321.00023	GCF_002220285.1	Bacillus cereus	5836971	0	0	0
BACE001.0321.00024	GCF_002290105.1	Bacillus cereus	5308319	0	0	0
BACE001.0321.00025	GCF_002813875.1	Bacillus cereus	5947010	0	0	0
BACE001.0321.00026	GCF_003013315.1	Bacillus cereus	5431893	0	0	0
BACE001.0321.00027	GCF_003020845.1	Bacillus cereus	5361178	0	0	0
BACE001.0321.00028	GCF_003568565.1	Bacillus cereus	6029077	0	0	0
BACE001.0321.00029	GCF_004006495.1	Bacillus cereus	5466652	0	0	0
BACE001.0321.00030	GCF_004771155.1	Bacillus cereus	5330209	0	0	0
BACE001.0321.00031	GCF_004801195.1	Bacillus cereus	5247580	0	0	0
BACE001.0321.00032	GCF_005707595.1	Bacillus cereus	5340498	0	0	0
BACE001.0321.00033	GCF_006384875.1	Bacillus cereus	5933053	0	0	0
BACE001.0321.00034	GCF_008041975.1	Bacillus cereus	5864545	0	0	0
BACE001.0321.00035	GCF_009497015.2	Bacillus cereus	6347382	0	0	0
BACE001.0321.00036	GCF_009739925.1	Bacillus cereus	5429165	0	0	0
BACE001.0321.00037	GCF_009739965.1	Bacillus cereus	5856577	0	0	0
BACE001.0321.00038	GCF_009739985.1	Bacillus cereus	5641940	0	0	0
BACE001.0321.00039	GCF_013112375.1	Bacillus cereus	5750332	0	0	0
BACE001.0321.00040	GCF_013177495.2	Bacillus cereus	5695148	0	0	0
BACE001.0321.00041	GCF_013267235.1	Bacillus cereus	6068562	0	0	0
BACE001.0321.00042	GCF_013267255.1	Bacillus cereus	6189771	0	0	0
BACE001.0321.00043	GCF_013267275.1	Bacillus cereus	6189625	0	0	0
BACE001.0321.00044	GCF_013267455.1	Bacillus cereus	5642335	0	0	0
BACE001.0321.00045	GCF_013267475.1	Bacillus cereus	5642349	0	0	0
BACE001.0321.00046	GCF_013267775.1	Bacillus cereus	5624453	0	0	0
BACE001.0321.00047	GCF_013394245.1	Bacillus cereus	5651595	0	0	0
BACE001.0321.00048	GCF_016027015.1	Bacillus cereus	5449713	0	0	0
BACE001.0321.00049	GCF_016727405.1	Bacillus cereus	5323797	0	0	0
BACE001.0321.00050	GCF_016774535.1	Bacillus cereus	6098577	0	0	0
BACE001.0321.00051	GCF_016774555.1	Bacillus cereus	6258015	0	0	0
BACE001.0321.00052	GCF_016774575.1	Bacillus cereus	5843781	0	0	0
BACE001.0321.00053	GCF_016917795.1	Bacillus cereus	5821889	0	0	0
BACE001.0321.00054	GCF_000008005.1	Bacillus cereus ATCC 10987	5432652	0	0	0
BACE001.0321.00055	GCF_000007825.1	Bacillus cereus ATCC 14579	5427083	0	0	0
BACE001.0321.00056	GCF_006094295.1	Bacillus cereus ATCC 14579	5431377	0	0	0
BACE001.0321.00057	GCF_000832805.1	Bacillus cereus G9241	5720073	0	0	0
BACE001.0321.00058	GCF_000011625.1	Bacillus cereus E33L	5843235	0	0	0
BACE001.0321.00059	GCF_000833045.1	Bacillus cereus E33L	5846781	0	0	0
BACE001.0321.00060	GCF_000283675.1	Bacillus cereus NC7401	5552031	0	0	0
BACE001.0321.00061	GCF_000239195.1	Bacillus cereus F837/76	5288498	0	0	0
BACE001.0321.00062	GCF_000013065.1	Bacillus cereus Q1	5506207	0	0	0
BACE001.0321.00063	GCF_000021305.1	Bacillus cereus G9842	5736823	0	0	0
BACE001.0321.00064	GCF_000021205.1	Bacillus cereus B4264	5419036	0	0	0
BACE001.0321.00065	GCF_000021225.1	Bacillus cereus AH187	5599857	0	0	0
BACE001.0321.00066	GCF_000021785.1	Bacillus cereus AH820	5588834	0	0	0
BACE001.0321.00067	GCF_000832865.1	Bacillus cereus 03BB108	6068729	0	0	0
BACE001.0321.00068	GCF_000832845.1	Bacillus cereus ATCC 4342	5306298	0	0	0
BACE001.0321.00069	GCF_000022505.1	Bacillus cereus 03BB102	5449308	0	0	0
BACE001.0321.00070	GCF_000832405.1	Bacillus cereus 03BB102	5448107	0	0	0
BACE001.0321.00071	GCF_000143605.1	Bacillus cereus biovar anthracis str. CI	5486649	0	0	0
BACE001.0321.00072	GCF_002224345.1	Bacillus cereus C1L	6047547	0	0	0
BACE001.0321.00073	GCF_000292415.1	Bacillus cereus FRI-35	5382319	0	0	0
BACE001.0321.00074	GCF_000832385.1	Bacillus cereus D17	5590358	0	0	0
BACE002.0321.00001	GCF_000177235.2	Bacillus cellulosilyticus DSM 2522	4681672	0	0	0
BACE003.0321.00001	GCF_001318345.1	Bacteroides cellulosilyticus	7084828	0	0	0
BACI001.0321.00001	GCF_003726095.1	Bacillus circulans	5175203	0	0	0
BACI001.0321.00002	GCF_003726115.1	Bacillus circulans	5274417	0	0	0
BACI001.0321.00003	GCF_013138395.1	Bacillus circulans	5398834	0	0	0
BACI001.0321.00004	GCF_013267435.1	Bacillus circulans	5179558	0	0	0
BACI002.0321.00001	GCF_006704205.1	Bacillus ciccensis	5207802	0	0	0
BACL001.0321.00001	GCF_000253015.1	Bartonella clarridgeiae 73	1522743	0	0	0
BACL002.0321.00001	GCF_000009825.1	Bacillus clausii KSM-K16	4303871	0	0	0
BACO001.0321.00001	GCF_000876545.1	Bacillus coagulans	3624641	0	0	0
BACO001.0321.00002	GCF_001039495.1	Bacillus coagulans	3694837	0	0	0
BACO001.0321.00003	GCF_001870065.1	Bacillus coagulans	3599077	0	0	0
BACO001.0321.00004	GCF_002946455.1	Bacillus coagulans	3602752	0	0	0
BACO001.0321.00005	GCF_003184245.1	Bacillus coagulans	3642571	0	0	0
BACO001.0321.00006	GCF_004114715.1	Bacillus coagulans	3664215	0	0	0
BACO001.0321.00007	GCF_006716385.1	Bacillus coagulans	3628651	0	0	0
BACO001.0321.00008	GCF_013402775.1	Bacillus coagulans	3514330	0	0	0
BACO001.0321.00009	GCF_015655285.1	Bacillus coagulans	3564910	0	0	0
BACO001.0321.00010	GCF_016724825.1	Bacillus coagulans	3342828	0	0	0
BACO001.0321.00011	GCF_000169195.2	Bacillus coagulans 36D1	3552226	0	0	0
BACO001.0321.00012	GCF_000217835.1	Bacillus coagulans 2-6	3073079	0	0	0
BACO002.0321.00001	GCF_002250055.1	Bacillus cohnii	4899141	0	0	0
BACY001.0321.00001	GCF_000017425.1	Bacillus cytotoxicus NVH 391-98	4094159	0	0	0
BACY001.0321.00002	GCF_002250885.2	Bacillus cytotoxicus	4352623	0	0	0
BACY001.0321.00003	GCF_002250905.2	Bacillus cytotoxicus	4345725	0	0	0
BACY001.0321.00004	GCF_002250925.2	Bacillus cytotoxicus	4317210	0	0	0
BACY001.0321.00005	GCF_002250945.2	Bacillus cytotoxicus	4162397	0	0	0
BACY001.0321.00006	GCF_002250965.2	Bacillus cytotoxicus	4303547	0	0	0
BACY001.0321.00007	GCF_002251005.2	Bacillus cytotoxicus	4336492	0	0	0
BACY001.0321.00008	GCF_002251025.2	Bacillus cytotoxicus	4303547	0	0	0
BACY001.0321.00009	GCF_002251045.2	Bacillus cytotoxicus	4389357	0	0	0
BACY001.0321.00010	GCF_002251055.2	Bacillus cytotoxicus	4282094	0	0	0
BACY001.0321.00011	GCF_002251115.2	Bacillus cytotoxicus	4381771	0	0	0
BADA001.0321.00001	GCF_007995155.1	Bacillus dafuensis	4916069	0	0	0
BADO001.0321.00008	GCF_001640865.1	Bacteroides dorei CL03T12C01	5310365	0	0	0
BAEL001.0321.00001	GCF_900638615.1	Bartonella elizabethae	2018538	0	0	0
BAFR001.0321.00001	GCF_900636945.1	Bacillus freudenreichii	4368765	0	0	0
BAFR002.0321.00001	GCF_000710365.2	Bacteroides fragilis	5417262	0	0	0
BAFR002.0321.00002	GCF_000710375.2	Bacteroides fragilis	5565806	0	0	0
BAFR002.0321.00003	GCF_000724665.2	Bacteroides fragilis	5316784	0	1	0
BAFR002.0321.00004	GCF_000724795.2	Bacteroides fragilis	5155157	0	0	0
BAFR002.0321.00005	GCF_000724805.2	Bacteroides fragilis	5484743	0	0	0
BAFR002.0321.00006	GCF_000724815.2	Bacteroides fragilis	5504076	0	0	0
BAFR002.0321.00007	GCF_000965785.1	Bacteroides fragilis	5282232	0	0	0
BAFR002.0321.00008	GCF_001286525.1	Bacteroides fragilis	5188967	0	0	0
BAFR002.0321.00009	GCF_001682215.1	Bacteroides fragilis	4902215	0	0	0
BAFR002.0321.00010	GCF_002849695.1	Bacteroides fragilis	5315431	0	0	0
BAFR002.0321.00011	GCF_005706655.1	Bacteroides fragilis	5241693	0	0	0
BAFR002.0321.00012	GCF_008369705.1	Bacteroides fragilis	5419725	0	0	0
BAFR002.0321.00013	GCF_013267555.1	Bacteroides fragilis	5605704	0	0	0
BAFR002.0321.00014	GCF_016864615.1	Bacteroides fragilis	5380874	0	0	0
BAFR002.0321.00015	GCF_000009925.1	Bacteroides fragilis YCH46	5310990	0	0	0
BAFR002.0321.00016	GCF_000210835.1	Bacteroides fragilis 638R	5373121	0	0	0
BAGI001.0321.00001	GCF_001719185.1	Bacillus gibsonii	4100094	0	0	0
BAGL001.0321.00001	GCF_002443095.1	Bacillus glycinifermentans	4659467	0	0	0
BAGL001.0321.00002	GCF_004103615.1	Bacillus glycinifermentans	4810226	0	0	0
BAGL001.0321.00003	GCF_900093775.1	Bacillus glycinifermentans	4607442	0	0	0
BAGR001.0321.00001	GCF_000022725.1	Bartonella grahamii as4aup	2369520	0	0	0
BAHA001.0321.00001	GCF_014042035.1	Bacillus haynesii	4235749	0	0	0
BAHA002.0321.00001	GCF_004006435.1	Bacillus halotolerans	4154245	0	0	0
BAHA002.0321.00002	GCF_006965425.1	Bacillus halotolerans	4144458	0	0	0
BAHA002.0321.00003	GCF_014621755.1	Bacillus halotolerans	4203618	0	0	0
BAHA003.0321.00002	GCF_000011145.1	Bacillus halodurans C-125	4202352	0	0	0
BAHE001.0321.00001	GCF_002998535.1	Bacteroides heparinolyticus	3608975	0	0	0
BAHE002.0321.00001	GCF_000186225.1	Bacteroides helcogenes P 36-108	3998906	0	0	0
BAHE003.0321.00001	GCF_000612765.1	Bartonella henselae	1975503	0	0	0
BAHE003.0321.00002	GCF_000612965.1	Bartonella henselae	1905383	0	0	0
BAHE003.0321.00003	GCF_001291465.1	Bartonella henselae	1905383	0	0	0
BAHE003.0321.00004	GCF_002735245.1	Bartonella henselae	1955425	0	0	0
BAHE003.0321.00005	GCF_000046705.1	Bartonella henselae str. Houston-1	1931047	0	0	0
BAHO001.0321.00001	GCF_002157855.1	Bacillus horikoshii	4295882	0	0	0
BAIN001.0321.00001	GCF_000959025.1	Bacillus intestinalis	4031727	0	0	0
BAIN002.0321.00001	GCF_000473245.1	Bacillus infantis NRRL B-14911	4884713	0	0	0
BAIN003.0321.00001	GCF_003363675.2	Bacteroides intestinalis	5785761	0	0	0
BAIN004.0321.00001	GCF_001534785.1	Bacillus inaquosorum	4143890	0	0	0
BAIN004.0321.00002	GCF_003148415.1	Bacillus inaquosorum	4350498	0	0	0
BAKO001.0321.00001	GCF_003606325.2	Bartonella kosoyi	2276164	0	0	0
BAKR001.0321.00001	GCF_003606345.3	Bartonella krasnovii	2186621	0	0	0
BALE001.0321.00001	GCF_000706725.1	Bacillus lehensis G1	3993073	0	0	0
BALI001.0321.00001	GCF_001596055.1	Bacillus licheniformis	4252398	0	0	0
BALI001.0321.00002	GCF_001726125.1	Bacillus licheniformis	4422181	0	0	0
BALI001.0321.00003	GCF_002074075.1	Bacillus licheniformis	4300706	0	0	0
BALI001.0321.00004	GCF_002074095.1	Bacillus licheniformis	4342466	0	0	0
BALI001.0321.00005	GCF_002074115.1	Bacillus licheniformis	4475542	0	0	0
BALI001.0321.00006	GCF_002074135.1	Bacillus licheniformis	4405338	0	0	0
BALI001.0321.00007	GCF_002173675.1	Bacillus licheniformis	4824459	0	0	0
BALI001.0321.00008	GCF_002174255.1	Bacillus licheniformis	4438492	0	0	0
BALI001.0321.00009	GCF_002236895.1	Bacillus licheniformis	4287720	0	0	0
BALI001.0321.00010	GCF_002504325.1	Bacillus licheniformis	4260287	0	0	0
BALI001.0321.00011	GCF_002966955.1	Bacillus licheniformis	4332232	0	0	0
BALI001.0321.00012	GCF_003253815.1	Bacillus licheniformis	4208157	0	0	0
BALI001.0321.00013	GCF_003339545.1	Bacillus licheniformis	4405373	0	0	0
BALI001.0321.00014	GCF_003595625.1	Bacillus licheniformis	4440709	0	0	0
BALI001.0321.00015	GCF_003606405.1	Bacillus licheniformis	4490546	0	0	0
BALI001.0321.00016	GCF_003952865.1	Bacillus licheniformis	4193958	0	0	0
BALI001.0321.00017	GCF_004101525.1	Bacillus licheniformis	4471280	0	0	0
BALI001.0321.00018	GCF_004103575.1	Bacillus licheniformis	4516868	0	0	0
BALI001.0321.00019	GCF_004119755.1	Bacillus licheniformis	4419047	0	0	0
BALI001.0321.00020	GCF_004119795.1	Bacillus licheniformis	4298206	0	0	0
BALI001.0321.00021	GCF_004526275.1	Bacillus licheniformis	4230480	0	0	0
BALI001.0321.00022	GCF_006094335.1	Bacillus licheniformis	4239205	0	0	0
BALI001.0321.00023	GCF_006494795.1	Bacillus licheniformis	4280457	0	0	0
BALI001.0321.00024	GCF_006974025.1	Bacillus licheniformis	4341076	0	0	0
BALI001.0321.00025	GCF_007855455.1	Bacillus licheniformis	4201713	0	0	0
BALI001.0321.00026	GCF_009662395.1	Bacillus licheniformis	4352529	0	0	0
BALI001.0321.00027	GCF_015689075.1	Bacillus licheniformis	4268296	0	0	0
BALI001.0321.00028	GCF_016026835.1	Bacillus licheniformis	4693369	0	0	0
BALI001.0321.00029	GCF_016126875.1	Bacillus licheniformis	4232501	0	0	0
BALI001.0321.00030	GCF_902386215.1	Bacillus licheniformis	4208157	0	0	0
BALI001.0321.00031	GCF_000008425.1	Bacillus licheniformis DSM 13 = ATCC 14580	4222645	0	0	0
BALI001.0321.00032	GCF_000011645.1	Bacillus licheniformis DSM 13 = ATCC 14580	4222597	0	0	0
BALU001.0321.00001	GCF_009739945.1	Bacillus luti	5315231	0	0	0
BAMA001.0321.00001	GCF_003667865.1	Bacillus marisflavi	4591517	0	0	0
BAMA001.0321.00002	GCF_009806575.1	Bacillus marisflavi	4549254	0	0	0
BAME001.0321.00016	GCF_000025825.1	Bacillus megaterium QM B1551	5523192	0	0	0
BAME001.0321.00017	GCF_000025805.1	Bacillus megaterium DSM 319	5097447	0	0	0
BAME001.0321.00018	GCF_000225265.1	Bacillus megaterium WSH-002	5075293	0	0	0
BAME001.0321.00019	GCF_000334875.3	Bacillus megaterium NCT-2	5883957	0	0	0
BAME001.0321.00020	GCF_000832985.1	Bacillus megaterium NBRC 15308 = ATCC 14581	5746640	0	1	0
BAME001.0321.00021	GCF_006094495.1	Bacillus megaterium NBRC 15308 = ATCC 14581	5746548	0	0	0
BAME001.0321.00022	GCF_001050455.1	Bacillus megaterium Q3	5229799	0	0	0
BAME002.0321.00001	GCF_000724485.1	Bacillus methanolicus MGA3	3425208	0	0	0
BAMO001.0321.00001	GCF_003612955.1	Bacillus mobilis	5468285	0	0	0
BAMO002.0321.00001	GCF_012648005.1	Bacillus mojavensis	4031121	0	0	0
BAMO002.0321.00002	GCF_015074845.1	Bacillus mojavensis	3965118	0	0	0
BAMY001.0321.00001	GCF_000775975.1	Bacillus mycoides	5608349	0	0	0
BAMY001.0321.00002	GCF_000832605.1	Bacillus mycoides	5637053	0	0	0
BAMY001.0321.00003	GCF_002104575.1	Bacillus mycoides	6558090	0	0	0
BAMY001.0321.00004	GCF_008274925.1	Bacillus mycoides	5939450	0	0	0
BAMY001.0321.00005	GCF_000018825.1	Bacillus mycoides KBAB4	5872743	0	0	0
BAOC001.0321.00002	GCF_000294775.2	Bacillus oceanisediminis 2691	5848607	0	0	0
BAOV001.0321.00001	GCF_001314995.1	Bacteroides ovatus	6472489	0	0	0
BAOV001.0321.00002	GCF_007012325.1	Bacteroides ovatus	7239254	0	1	0
BAOV001.0321.00003	GCF_009734165.1	Bacteroides ovatus	6571392	0	0	0
BAOV001.0321.00004	GCF_900095495.1	Bacteroides ovatus V975	6475296	0	0	0
BAPA001.0321.00001	GCF_000408885.1	Bacillus paralicheniformis ATCC 9945a	4376305	0	0	0
BAPA001.0321.00002	GCF_000876525.1	Bacillus paralicheniformis	4388022	0	0	0
BAPA001.0321.00003	GCF_002068155.1	Bacillus paralicheniformis	4352468	0	0	0
BAPA001.0321.00004	GCF_002393225.1	Bacillus paralicheniformis	4535069	0	0	0
BAPA001.0321.00005	GCF_002993925.1	Bacillus paralicheniformis	4376831	0	0	0
BAPA001.0321.00006	GCF_002993945.1	Bacillus paralicheniformis	4464381	0	0	0
BAPA001.0321.00007	GCF_003711025.1	Bacillus paralicheniformis	4476034	0	0	0
BAPA001.0321.00008	GCF_008365255.1	Bacillus paralicheniformis	4575791	0	0	0
BAPA001.0321.00009	GCF_009497935.1	Bacillus paralicheniformis	4450636	0	0	0
BAPA001.0321.00010	GCF_900635765.1	Bacillus paralicheniformis	4430306	0	0	0
BAPA002.0321.00001	GCF_005848985.1	Bacillus paranthracis	5319903	0	0	0
BAPA002.0321.00002	GCF_009648955.1	Bacillus paranthracis	5645678	0	0	0
BAPA002.0321.00003	GCF_009799965.1	Bacillus paranthracis	5673366	0	0	0
BAPA002.0321.00004	GCF_010669045.1	Bacillus paranthracis	5687871	0	0	0
BAPA002.0321.00005	GCF_015693885.1	Bacillus paranthracis	5149464	0	0	0
BAPS001.0321.00001	GCF_000743945.1	Basilea psittacipulmonis DSM 24701	1959069	0	0	0
BAPS002.0321.00001	GCF_000742855.1	Bacillus pseudomycoides	5675302	0	0	0
BAPS002.0321.00002	GCF_000832885.1	Bacillus pseudomycoides	5676963	0	0	0
BAPS003.0321.00001	GCF_000005825.2	Bacillus pseudofirmus OF4	4249248	0	0	0
BAPU001.0321.00001	GCF_000590455.1	Bacillus pumilus	3763493	0	0	0
BAPU001.0321.00002	GCF_001548215.1	Bacillus pumilus	3723433	0	0	0
BAPU001.0321.00003	GCF_001578165.1	Bacillus pumilus	3860091	0	0	0
BAPU001.0321.00004	GCF_001578205.1	Bacillus pumilus	3878815	0	0	0
BAPU001.0321.00005	GCF_001704975.1	Bacillus pumilus	3710774	0	0	0
BAPU001.0321.00006	GCF_003431975.1	Bacillus pumilus	3937399	0	0	0
BAPU001.0321.00007	GCF_003571425.1	Bacillus pumilus	3747740	0	0	0
BAPU001.0321.00008	GCF_004006455.1	Bacillus pumilus	3640542	0	0	0
BAPU001.0321.00009	GCF_013423765.1	Bacillus pumilus	3854893	0	0	0
BAPU001.0321.00010	GCF_014489355.1	Bacillus pumilus	3737918	0	0	0
BAPU001.0321.00011	GCF_900186955.1	Bacillus pumilus	3855667	0	0	0
BAPU001.0321.00012	GCF_000017885.4	Bacillus pumilus SAFR-032	3704641	0	0	0
BAQU001.0321.00001	GCF_009936175.1	Bartonella quintana	1588683	0	0	0
BAQU001.0321.00002	GCF_900475345.1	Bartonella quintana	1572974	0	0	0
BAQU001.0321.00003	GCF_000046685.1	Bartonella quintana str. Toulouse	1581384	0	0	0
BAQU001.0321.00004	GCF_000294715.1	Bartonella quintana RM-11	1587646	0	0	0
BASA001.0321.00001	GCF_002237535.1	Bacterioplanes sanyensis	4293726	0	1	0
BASA002.0321.00001	GCF_001895885.1	Bacillus safensis	3972564	0	0	0
BASA002.0321.00002	GCF_001938665.1	Bacillus safensis	4151325	0	0	0
BASA002.0321.00003	GCF_001938685.1	Bacillus safensis	3735181	0	0	0
BASA002.0321.00004	GCF_001938705.1	Bacillus safensis	3741804	0	0	0
BASA002.0321.00005	GCF_002077215.1	Bacillus safensis	3740842	0	0	0
BASA002.0321.00006	GCF_008244765.1	Bacillus safensis	3786744	0	0	0
BASA002.0321.00007	GCF_016803835.1	Bacillus safensis	3782236	0	0	0
BASI001.0321.00001	GCF_002850535.1	Bacillus siamensis	4280711	0	0	0
BASI001.0321.00002	GCF_016313165.1	Bacillus siamensis	3957728	0	0	0
BASM001.0321.00001	GCF_001050115.1	Bacillus smithii	3381292	0	0	0
BASO001.0321.00001	GCF_002202015.1	Bacillus sonorensis	4832293	0	0	0
BASO002.0321.00001	GCF_007970665.1	Baekduia soli	5212251	0	0	0
BASP001.0321.00001	GCF_000465465.2	Bacillus sp. NSP9.1	4543164	0	0	0
BASP002.0321.00001	GCF_000469135.2	Bacillus sp. SB49	3765941	0	0	0
BASP003.0321.00001	GCF_000259365.1	Bacillus sp. JS	4120406	0	0	0
BASP004.0321.00001	GCF_000815145.1	Bacillus sp. Pc3	3982168	0	0	0
BASP005.0321.00001	GCF_000747345.1	Bacillus sp. X1(2014)	3422674	0	0	0
BASP006.0321.00001	GCF_000827045.1	Bacillus sp. BH072	4069641	0	0	0
BASP007.0321.00001	GCF_000877815.1	Bacillus sp. YP1	4153566	0	0	0
BASP008.0321.00001	GCF_000978495.1	Bacillus sp. LM 4-2	4069266	0	0	0
BASP009.0321.00001	GCF_001553895.1	Bacillus sp. SDLI1	4134042	0	0	0
BASP010.0321.00001	GCF_001816185.2	Bacillus sp. RZ2MS9	5357194	0	0	0
BASP011.0321.00001	GCF_001648135.1	Bacillus sp. IHB B 7164	5036631	0	0	0
BASP012.0321.00001	GCF_001719225.1	Bacillus sp. FJAT-14266	4109356	0	0	0
BASP013.0321.00001	GCF_002073415.2	Bacillus sp. FDAARGOS_235	5608392	0	0	0
BASP014.0321.00001	GCF_001896025.1	Bacillus sp. H15-1	4162101	0	0	0
BASP015.0321.00001	GCF_001831375.1	Bacillus sp. ABP14	5152566	0	0	0
BASP016.0321.00001	GCF_002022505.1	Bartonella sp. WD16.2	1762996	0	0	0
BASP017.0321.00001	GCF_002022605.1	Bartonella sp. JB15	1494018	0	0	0
BASP018.0321.00001	GCF_002022665.1	Bartonella sp. JB63	1493693	0	0	0
BASP019.0321.00001	GCF_002022485.1	Bartonella sp. A1379B	1541976	0	0	0
BASP020.0321.00001	GCF_002022585.1	Bartonella sp. Raccoon60	1615700	0	0	0
BASP021.0321.00001	GCF_001999205.1	Bacillus sp. 275	4051970	0	0	0
BASP022.0321.00001	GCF_002201875.1	Bacillus sp. MD-5	4161448	0	0	0
BASP023.0321.00001	GCF_002269275.1	Bacillus sp. 1s-1	4166290	0	0	0
BASP024.0321.00001	GCF_002763675.1	Bacillus sp. Lzh-5	4024750	0	0	0
BASP025.0321.00001	GCF_003047225.1	Bacillus sp. Y-01	5130901	0	0	0
BASP026.0321.00001	GCF_002833485.1	Bacillus sp. HBCD-sjtu	5230501	0	0	0
BASP027.0321.00001	GCF_004799705.1	Bacillus sp. DU-106	5415320	0	0	0
BASP028.0321.00001	GCF_003047165.1	Bacillus sp. ZY-1-1	3899251	0	0	0
BASP029.0321.00001	GCF_004115325.2	Bacteroides sp. PHL 2737	5539106	0	0	0
BASP030.0321.00001	GCF_003171815.2	Bacillus sp. SUBG0010	4317835	0	0	0
BASP031.0321.00001	GCF_008274865.1	Bacillus sp. AR4-2	5438461	0	0	0
BASP032.0321.00001	GCF_008274885.1	Bacillus sp. SH8-8	5439260	0	0	0
BASP033.0321.00001	GCF_008274905.1	Bacillus sp. JAS24-2	6129653	0	0	0
BASP034.0321.00001	GCF_003330965.1	Bacillus sp. DM2	4322871	0	0	0
BASP035.0321.00001	GCF_004103875.1	Bacillus sp. WR11	4202080	0	0	0
BASP036.0321.00001	GCF_007363175.1	Bacillus sp. BD59S	5645291	0	0	0
BASP037.0321.00001	GCF_004328515.1	Bacteroides sp. A1C1	4502190	0	0	0
BASP038.0321.00001	GCF_004322655.1	Bacillus sp. SYJ	5520756	0	0	0
BASP039.0321.00001	GCF_009720625.1	Bacillus sp. DSL-17	5602542	0	0	0
BASP040.0321.00001	GCF_003812125.1	Bacillus sp. FDAARGOS_527	5701116	0	0	0
BASP041.0321.00001	GCF_005937795.2	Bacillus sp. KBS0812	4299846	0	0	0
BASP042.0321.00001	GCF_012572025.1	Bacillus sp. HNA3	3929648	0	0	0
BASP043.0321.00001	GCF_009363695.1	Bacillus sp. THAF10	4087834	0	0	0
BASP044.0321.00001	GCF_011082085.1	Bacillus sp. Cs-700	4297839	0	0	0
BASP045.0321.00001	GCF_006965545.2	Bacillus sp. M4U3P1	4040495	0	0	0
BASP046.0321.00001	GCF_008432245.1	Bacillus sp. BS98	5858218	0	0	0
BASP048.0321.00001	GCF_009193295.2	Bacteroides sp. HF-5141	5760088	0	0	0
BASP049.0321.00001	GCF_009861435.1	Bacillus sp. A260	5469565	0	0	0
BASP050.0321.00001	GCF_009906915.1	Bacillus sp. AM1(2019)	4203926	0	0	0
BASP051.0321.00001	GCF_009676825.1	Bacillus sp. N3536	4016906	0	0	0
BASP052.0321.00001	GCF_009818105.1	Bacillus sp. N1-1	4497340	0	0	0
BASP053.0321.00001	GCF_009759805.1	Bacillus sp. ms-22	3629561	0	0	0
BASP054.0321.00001	GCF_011008975.1	Bacillus sp. LUNF1	3980777	0	0	0
BASP055.0321.00001	GCF_011398925.1	Bacillus sp. KH172YL63	4251700	0	0	0
BASP056.0321.00001	GCF_012113595.1	Bacteroides sp. CBA7301	6782182	0	0	0
BASP057.0321.00001	GCF_012955605.1	Bacillus sp. CS13	3159449	0	0	0
BASP058.0321.00001	GCF_013874375.1	Bacteroides sp. CACC 737	4634436	0	0	0
BASP059.0321.00001	GCF_014117425.1	Bartonella sp. HY038	3602772	0	0	0
BASP060.0321.00001	GCF_014235785.1	Bacillus sp. PAMC26568	3899947	0	0	0
BASP061.0321.00001	GCF_014302175.1	Bacillus sp. PAMC22265	3791266	0	0	0
BASP062.0321.00001	GCF_014250435.1	Bacillus sp. PAMC28571	3793123	0	0	0
BASP063.0321.00001	GCF_014250415.1	Bacillus sp. PAMC28748	4212838	0	0	0
BASP064.0321.00001	GCF_014250375.1	Bacillus sp. PAMC26543	4101852	0	0	0
BASP065.0321.00001	GCF_016889925.1	Bacteroides sp FDAARGOS 1225	5248938	0	0	0
BASP066.0321.00001	GCF_014960805.1	Bacillus sp. HD4P25	4504259	0	0	0
BASP067.0321.00001	GCF_015679285.1	Bacteroides sp. HF-162	4384378	0	0	0
BASP068.0321.00001	GCF_015999585.1	Bacillus sp. V3	4449890	0	0	0
BASP069.0321.00001	GCF_016653575.1	Bacillus sp. TK-2	5286177	0	0	0
BASP070.0321.00001	GCF_016924995.1	Bacillus sp. LJBS06	4237297	0	0	0
BASP071.0321.00001	GCF_016919285.1	Bacillus sp. PDNC022	3822815	0	0	0
BASP072.0321.00001	GCF_003586445.1	Bacillus sp. Y1	5028825	0	0	0
BASP073.0321.00001	GCF_005154805.1	Bacillus sp. S3	5677811	0	0	0
BASP074.0321.00001	GCF_002810325.1	Bartonella sp. 1-1C	1600621	0	0	0
BASP075.0321.00001	GCF_002843505.1	Bacillus sp. SJ-10	4041647	0	0	0
BASP076.0321.00001	GCF_000242895.2	Bacillus sp. 1NLA3E	4815602	0	0	0
BASP077.0321.00001	GCF_000800825.1	Bacillus sp. WP8	3708888	0	0	0
BASP078.0321.00001	GCF_000829195.1	Bacillus sp. OxB-1	3594618	0	0	0
BAST001.0321.00001	GCF_002872415.1	Bacteriovorax stolpii	3810309	0	0	0
BAST001.0321.00002	GCF_006874605.1	Bacteriovorax stolpii	3880871	0	0	0
BASU001.0321.00001	GCF_000772125.1	Bacillus subtilis	3876276	0	0	0
BASU001.0321.00002	GCF_000772165.1	Bacillus subtilis	3959897	0	0	0
BASU001.0321.00003	GCF_000772205.1	Bacillus subtilis	3981674	0	0	0
BASU001.0321.00004	GCF_000782835.1	Bacillus subtilis	4079669	0	0	0
BASU001.0321.00005	GCF_000789295.1	Bacillus subtilis	4215367	0	0	0
BASU001.0321.00006	GCF_000952895.1	Bacillus subtilis	4233615	0	0	0
BASU001.0321.00007	GCF_000953615.1	Bacillus subtilis	4251652	0	0	0
BASU001.0321.00008	GCF_001015095.1	Bacillus subtilis	4025326	0	0	0
BASU001.0321.00009	GCF_001037985.1	Bacillus subtilis	4090708	0	0	0
BASU001.0321.00010	GCF_001604995.1	Bacillus subtilis	4195195	0	0	0
BASU001.0321.00011	GCF_001704095.1	Bacillus subtilis	4235115	0	0	0
BASU001.0321.00012	GCF_001720505.1	Bacillus subtilis	4165121	0	0	0
BASU001.0321.00013	GCF_001746575.1	Bacillus subtilis	4010416	0	0	0
BASU001.0321.00014	GCF_001747445.1	Bacillus subtilis	4195418	0	0	0
BASU001.0321.00015	GCF_001808235.1	Bacillus subtilis	4013819	0	0	0
BASU001.0321.00016	GCF_001889385.1	Bacillus subtilis	4117900	0	0	0
BASU001.0321.00017	GCF_001889625.1	Bacillus subtilis	4108293	0	0	0
BASU001.0321.00018	GCF_001890405.1	Bacillus subtilis	4212430	0	0	0
BASU001.0321.00019	GCF_001902555.1	Bacillus subtilis	4204050	0	0	0
BASU001.0321.00020	GCF_002055965.1	Bacillus subtilis	4299822	0	0	0
BASU001.0321.00021	GCF_002072735.1	Bacillus subtilis	4072961	0	0	0
BASU001.0321.00022	GCF_002096095.1	Bacillus subtilis	4142593	0	0	0
BASU001.0321.00023	GCF_002142595.1	Bacillus subtilis	3923177	0	0	0
BASU001.0321.00024	GCF_002163815.1	Bacillus subtilis	4282516	0	0	0
BASU001.0321.00025	GCF_002202055.1	Bacillus subtilis	4065429	0	0	0
BASU001.0321.00026	GCF_002216085.1	Bacillus subtilis	4169021	0	0	0
BASU001.0321.00027	GCF_002269175.1	Bacillus subtilis	4014255	0	0	0
BASU001.0321.00028	GCF_002269195.1	Bacillus subtilis	4196031	0	0	0
BASU001.0321.00029	GCF_002290305.1	Bacillus subtilis	4072939	0	0	0
BASU001.0321.00030	GCF_002893805.1	Bacillus subtilis	4200488	0	0	0
BASU001.0321.00031	GCF_002982175.1	Bacillus subtilis	4226648	0	0	0
BASU001.0321.00032	GCF_003148355.1	Bacillus subtilis	4120380	0	0	0
BASU001.0321.00033	GCF_003184225.1	Bacillus subtilis	4040837	0	0	0
BASU001.0321.00034	GCF_003610955.1	Bacillus subtilis	4214174	0	0	0
BASU001.0321.00035	GCF_003612735.1	Bacillus subtilis	4145727	0	0	0
BASU001.0321.00036	GCF_004101345.1	Bacillus subtilis	4133206	0	0	0
BASU001.0321.00037	GCF_004101365.1	Bacillus subtilis	4206125	0	0	0
BASU001.0321.00038	GCF_004101405.1	Bacillus subtilis	4113808	0	0	0
BASU001.0321.00039	GCF_004101425.1	Bacillus subtilis	4136114	0	0	0
BASU001.0321.00040	GCF_004101445.1	Bacillus subtilis	4147136	0	0	0
BASU001.0321.00041	GCF_004101465.1	Bacillus subtilis	4111350	0	0	0
BASU001.0321.00042	GCF_004101485.1	Bacillus subtilis	4058528	0	0	0
BASU001.0321.00043	GCF_004101565.1	Bacillus subtilis	4105116	0	0	0
BASU001.0321.00044	GCF_004101945.1	Bacillus subtilis	4110138	0	0	0
BASU001.0321.00045	GCF_004103535.1	Bacillus subtilis	4215632	0	0	0
BASU001.0321.00046	GCF_004103555.1	Bacillus subtilis	4051556	0	0	0
BASU001.0321.00047	GCF_004103595.1	Bacillus subtilis	4133685	0	0	0
BASU001.0321.00048	GCF_004119535.1	Bacillus subtilis	4123786	0	0	0
BASU001.0321.00049	GCF_004119555.1	Bacillus subtilis	4110403	0	0	0
BASU001.0321.00050	GCF_004119595.1	Bacillus subtilis	4035212	0	0	0
BASU001.0321.00051	GCF_004119615.1	Bacillus subtilis	4012178	0	0	0
BASU001.0321.00052	GCF_004119635.1	Bacillus subtilis	4157489	0	0	0
BASU001.0321.00053	GCF_004119655.1	Bacillus subtilis	4126329	0	0	0
BASU001.0321.00054	GCF_004119675.1	Bacillus subtilis	4137450	0	0	0
BASU001.0321.00055	GCF_004119695.1	Bacillus subtilis	4143637	0	0	0
BASU001.0321.00056	GCF_004119715.1	Bacillus subtilis	4143632	0	0	0
BASU001.0321.00057	GCF_004119775.1	Bacillus subtilis	4343160	0	0	0
BASU001.0321.00058	GCF_004119815.1	Bacillus subtilis	4129860	0	0	0
BASU001.0321.00059	GCF_004119835.1	Bacillus subtilis	4210895	0	0	0
BASU001.0321.00060	GCF_004119875.1	Bacillus subtilis	4027238	0	0	0
BASU001.0321.00061	GCF_005160425.1	Bacillus subtilis	4076736	0	0	0
BASU001.0321.00062	GCF_005234095.1	Bacillus subtilis	4063004	0	0	0
BASU001.0321.00063	GCF_005849145.1	Bacillus subtilis	4073059	0	0	0
BASU001.0321.00064	GCF_006165085.1	Bacillus subtilis	4121982	0	0	0
BASU001.0321.00065	GCF_006364495.1	Bacillus subtilis	4045619	0	0	0
BASU001.0321.00066	GCF_008831405.1	Bacillus subtilis	4126713	0	0	0
BASU001.0321.00067	GCF_009363835.1	Bacillus subtilis	4230919	0	0	0
BASU001.0321.00068	GCF_009497795.1	Bacillus subtilis	4083694	0	0	0
BASU001.0321.00069	GCF_009497815.1	Bacillus subtilis	4178124	0	0	0
BASU001.0321.00070	GCF_009662155.1	Bacillus subtilis	4105407	0	0	0
BASU001.0321.00071	GCF_009662175.1	Bacillus subtilis	4263919	0	0	0
BASU001.0321.00072	GCF_009662195.1	Bacillus subtilis	4225362	0	0	0
BASU001.0321.00073	GCF_009662215.1	Bacillus subtilis	4275601	0	0	0
BASU001.0321.00074	GCF_009662235.1	Bacillus subtilis	4156459	0	0	0
BASU001.0321.00075	GCF_009662255.1	Bacillus subtilis	4221278	0	0	0
BASU001.0321.00076	GCF_009662275.1	Bacillus subtilis	4166516	0	0	0
BASU001.0321.00077	GCF_009662335.1	Bacillus subtilis	4103324	0	0	0
BASU001.0321.00078	GCF_009662355.1	Bacillus subtilis	4083248	0	0	0
BASU001.0321.00079	GCF_009662375.1	Bacillus subtilis	4087720	0	0	0
BASU001.0321.00080	GCF_009662415.1	Bacillus subtilis	4299726	0	0	0
BASU001.0321.00081	GCF_009662435.1	Bacillus subtilis	4299727	0	0	0
BASU001.0321.00082	GCF_009662455.1	Bacillus subtilis	4063468	0	0	0
BASU001.0321.00083	GCF_009665145.1	Bacillus subtilis	4015360	0	0	0
BASU001.0321.00084	GCF_009857115.1	Bacillus subtilis	4119195	0	0	0
BASU001.0321.00085	GCF_009866865.1	Bacillus subtilis	4209045	0	0	0
BASU001.0321.00086	GCF_009884005.1	Bacillus subtilis	4112497	0	0	0
BASU001.0321.00087	GCF_009913255.1	Bacillus subtilis	4025706	0	0	0
BASU001.0321.00088	GCF_009913275.1	Bacillus subtilis	4302773	0	0	0
BASU001.0321.00089	GCF_009913395.1	Bacillus subtilis	4102601	0	0	0
BASU001.0321.00090	GCF_009913515.1	Bacillus subtilis	4210797	0	0	0
BASU001.0321.00091	GCF_009913535.1	Bacillus subtilis	4220963	0	0	0
BASU001.0321.00092	GCF_009913555.1	Bacillus subtilis	4182847	0	0	0
BASU001.0321.00093	GCF_009913575.1	Bacillus subtilis	4047680	0	0	0
BASU001.0321.00094	GCF_009913595.1	Bacillus subtilis	4145782	0	0	0
BASU001.0321.00095	GCF_009914155.1	Bacillus subtilis	4089165	0	0	0
BASU001.0321.00096	GCF_012647565.1	Bacillus subtilis	4197841	0	0	0
BASU001.0321.00097	GCF_013285325.1	Bacillus subtilis	4101682	0	0	0
BASU001.0321.00098	GCF_013347105.1	Bacillus subtilis	4248134	0	0	0
BASU001.0321.00099	GCF_013388335.1	Bacillus subtilis	4215613	0	0	0
BASU001.0321.00100	GCF_013393725.1	Bacillus subtilis	4242126	0	0	0
BASU001.0321.00101	GCF_014171535.1	Bacillus subtilis	4070574	0	0	0
BASU001.0321.00102	GCF_014879275.1	Bacillus subtilis	4200880	0	0	0
BASU001.0321.00103	GCF_015535655.1	Bacillus subtilis	4105857	0	0	0
BASU001.0321.00104	GCF_015602625.1	Bacillus subtilis	4186822	0	0	0
BASU001.0321.00105	GCF_015654205.1	Bacillus subtilis	4253166	0	0	0
BASU001.0321.00106	GCF_016065415.1	Bacillus subtilis	4215646	0	0	0
BASU001.0321.00107	GCF_016894165.1	Bacillus subtilis	4080024	0	0	0
BASU001.0321.00108	GCF_001565875.1	Bacillus subtilis subsp. natto	4193748	0	0	0
BASU001.0321.00109	GCF_000827065.1	Bacillus subtilis subsp. subtilis	4195102	0	0	0
BASU001.0321.00110	GCF_001465815.1	Bacillus subtilis subsp. subtilis	4030837	0	0	0
BASU001.0321.00111	GCF_001541905.1	Bacillus subtilis subsp. subtilis	4056281	0	0	0
BASU001.0321.00112	GCF_001660525.1	Bacillus subtilis subsp. subtilis	3876919	0	0	0
BASU001.0321.00113	GCF_001697265.1	Bacillus subtilis subsp. subtilis	4211343	0	0	0
BASU001.0321.00114	GCF_001703495.1	Bacillus subtilis subsp. subtilis	4214812	0	0	0
BASU001.0321.00115	GCF_002173615.1	Bacillus subtilis subsp. subtilis	4199283	0	0	0
BASU001.0321.00116	GCF_002173695.1	Bacillus subtilis subsp. subtilis	3988602	0	0	0
BASU001.0321.00117	GCF_002173715.1	Bacillus subtilis subsp. subtilis	3988649	0	0	0
BASU001.0321.00118	GCF_002201955.1	Bacillus subtilis subsp. subtilis	3988630	0	0	0
BASU001.0321.00119	GCF_002201995.1	Bacillus subtilis subsp. subtilis	4169187	0	0	0
BASU001.0321.00120	GCF_002202035.1	Bacillus subtilis subsp. subtilis	4147173	0	0	0
BASU001.0321.00121	GCF_003665195.1	Bacillus subtilis subsp. subtilis	4202955	0	0	0
BASU001.0321.00122	GCF_003665215.1	Bacillus subtilis subsp. subtilis	4353673	0	0	0
BASU001.0321.00123	GCF_003665235.1	Bacillus subtilis subsp. subtilis	4209346	0	0	0
BASU001.0321.00124	GCF_003665255.1	Bacillus subtilis subsp. subtilis	4199434	0	0	0
BASU001.0321.00125	GCF_003665275.1	Bacillus subtilis subsp. subtilis	4345446	0	0	0
BASU001.0321.00126	GCF_003665295.1	Bacillus subtilis subsp. subtilis	4183830	0	0	0
BASU001.0321.00127	GCF_003665315.1	Bacillus subtilis subsp. subtilis	4187014	0	0	0
BASU001.0321.00128	GCF_003665335.1	Bacillus subtilis subsp. subtilis	4172713	0	0	0
BASU001.0321.00129	GCF_003665355.1	Bacillus subtilis subsp. subtilis	4186799	0	0	0
BASU001.0321.00130	GCF_003665395.1	Bacillus subtilis subsp. subtilis	4350274	0	0	0
BASU001.0321.00131	GCF_004328925.1	Bacillus subtilis subsp. subtilis	4216133	0	0	0
BASU001.0321.00132	GCF_006741845.1	Bacillus subtilis subsp. subtilis	4295305	0	0	0
BASU001.0321.00133	GCF_012648205.1	Bacillus subtilis subsp. subtilis	4059834	0	0	0
BASU001.0321.00134	GCF_012648345.1	Bacillus subtilis subsp. subtilis	4060035	0	0	0
BASU001.0321.00135	GCF_014298115.1	Bacillus subtilis subsp. subtilis	4004302	0	0	0
BASU001.0321.00136	GCF_014961985.1	Bacillus subtilis subsp. subtilis	4223820	0	0	0
BASU001.0321.00137	GCF_000009045.1	Bacillus subtilis subsp. subtilis str. 168	4215606	0	0	0
BASU001.0321.00138	GCF_000789275.1	Bacillus subtilis subsp. subtilis str. 168	4215619	0	0	0
BASU001.0321.00139	GCF_012931705.2	Bacillus subtilis subsp. subtilis str. 168	4227167	0	0	0
BASU001.0321.00140	GCF_013009385.1	Bacillus subtilis subsp. subtilis str. 168	4316079	0	0	0
BASU001.0321.00141	GCF_012030675.1	Bacillus subtilis subsp. subtilis str. SMY	4212427	0	0	0
BASU001.0321.00142	GCF_006088795.1	Bacillus subtilis subsp. subtilis NCIB 3610 = ATCC 6051	4295477	0	0	0
BASU001.0321.00143	GCF_000209795.2	Bacillus subtilis subsp. natto BEST195	4111218	0	0	0
BASU001.0321.00144	GCF_000186745.1	Bacillus subtilis BSn5	4093599	0	0	0
BASU001.0321.00145	GCF_000227485.1	Bacillus subtilis subsp. subtilis str. RO-NN-1	4011949	0	0	0
BASU001.0321.00146	GCF_000971925.1	Bacillus subtilis KCTC 1028 = ATCC 6051a	4215633	0	0	0
BASU001.0321.00147	GCF_000344745.1	Bacillus subtilis subsp. subtilis 6051-HGW	4215610	0	0	0
BASU001.0321.00148	GCF_000321395.1	Bacillus subtilis subsp. subtilis str. BSP1	4043754	0	0	0
BASU001.0321.00149	GCF_000523045.1	Bacillus subtilis BEST7003	4043042	0	0	0
BASU001.0321.00150	GCF_000293765.1	Bacillus subtilis QB928	4146839	0	0	0
BASU001.0321.00151	GCF_000699525.1	Bacillus subtilis subsp. subtilis str. AG1839	4193640	0	0	0
BASU001.0321.00152	GCF_000699465.1	Bacillus subtilis subsp. subtilis str. JH642 substr. AG174	4188369	0	0	0
BASU001.0321.00153	GCF_000338735.1	Bacillus subtilis XF-1	4061186	0	0	0
BASU001.0321.00154	GCF_000349795.1	Bacillus subtilis subsp. subtilis str. BAB-1	4021944	0	0	0
BASU001.0321.00155	GCF_000737405.1	Bacillus subtilis TO-A	4057487	0	0	0
BASU001.0321.00156	GCF_000706705.1	Bacillus subtilis subsp. subtilis str. OH 131.1	4039155	0	0	0
BASU001.0321.00157	GCF_000497485.1	Bacillus subtilis PY79	4033459	0	0	0
BASU001.0321.00158	GCF_000973605.1	Bacillus subtilis HJ5	4012933	0	0	0
BASU001.0321.00159	GCF_001597265.1	Bacillus subtilis subsp. globigii	4175482	0	0	0
BASU002.0321.00001	GCF_011455875.1	Basfia succiniciproducens	2253194	0	0	0
BASU003.0321.00001	GCF_000146565.1	Bacillus subtilis subsp. spizizenii str. W23	4027676	0	0	0
BASU003.0321.00002	GCF_006094475.1	Bacillus subtilis subsp. spizizenii ATCC 6633	4045538	0	0	0
BASU003.0321.00003	GCF_000227465.1	Bacillus subtilis subsp. spizizenii TU-B-10	4207222	0	0	0
BATE001.0321.00001	GCF_012225885.1	Bacillus tequilensis	4012371	0	0	0
BATH001.0321.00001	GCF_000832485.1	Bacillus thuringiensis	6093375	0	0	0
BATH001.0321.00002	GCF_000832825.1	Bacillus thuringiensis	5312179	0	0	0
BATH001.0321.00003	GCF_000832925.1	Bacillus thuringiensis	5291389	0	0	0
BATH001.0321.00004	GCF_000833085.1	Bacillus thuringiensis	5312686	0	0	0
BATH001.0321.00005	GCF_001017635.1	Bacillus thuringiensis	6784135	0	0	0
BATH001.0321.00006	GCF_001182785.1	Bacillus thuringiensis	6403459	0	0	0
BATH001.0321.00007	GCF_001420855.1	Bacillus thuringiensis	6227942	0	0	0
BATH001.0321.00008	GCF_001455345.1	Bacillus thuringiensis	5352926	0	0	0
BATH001.0321.00009	GCF_001595725.1	Bacillus thuringiensis	6390500	0	0	0
BATH001.0321.00010	GCF_001598095.1	Bacillus thuringiensis	6490457	0	0	0
BATH001.0321.00011	GCF_001618665.1	Bacillus thuringiensis	6111291	0	0	0
BATH001.0321.00012	GCF_001685565.1	Bacillus thuringiensis	6752488	0	0	0
BATH001.0321.00013	GCF_001692675.1	Bacillus thuringiensis	6152737	0	0	0
BATH001.0321.00014	GCF_002025105.1	Bacillus thuringiensis	6303767	0	0	0
BATH001.0321.00015	GCF_002119445.1	Bacillus thuringiensis	6316280	0	0	0
BATH001.0321.00016	GCF_002173755.1	Bacillus thuringiensis	5878235	0	0	0
BATH001.0321.00017	GCF_002184245.1	Bacillus thuringiensis	5675543	0	0	0
BATH001.0321.00018	GCF_002192515.1	Bacillus thuringiensis	5246329	0	0	0
BATH001.0321.00019	GCF_002222555.1	Bacillus thuringiensis	5661190	0	0	0
BATH001.0321.00020	GCF_003054785.2	Bacillus thuringiensis	6133281	0	0	0
BATH001.0321.00021	GCF_003626955.1	Bacillus thuringiensis	6303380	0	0	0
BATH001.0321.00022	GCF_003991175.1	Bacillus thuringiensis	6113568	0	0	0
BATH001.0321.00023	GCF_005155285.1	Bacillus thuringiensis	6681027	0	0	0
BATH001.0321.00024	GCF_006151925.1	Bacillus thuringiensis	6019481	0	0	0
BATH001.0321.00025	GCF_009025915.1	Bacillus thuringiensis	6599272	0	0	0
BATH001.0321.00026	GCF_009224065.1	Bacillus thuringiensis	5272357	0	0	0
BATH001.0321.00027	GCF_013267295.1	Bacillus thuringiensis	6207208	0	0	0
BATH001.0321.00028	GCF_013267315.1	Bacillus thuringiensis	5729874	0	0	0
BATH001.0321.00029	GCF_013267335.1	Bacillus thuringiensis	5312198	0	0	0
BATH001.0321.00030	GCF_013267795.1	Bacillus thuringiensis	5348653	0	0	0
BATH001.0321.00031	GCF_013267815.1	Bacillus thuringiensis	5328788	0	0	0
BATH001.0321.00032	GCF_013340745.1	Bacillus thuringiensis	6147475	0	0	0
BATH001.0321.00033	GCF_013343075.1	Bacillus thuringiensis	5337780	0	0	0
BATH001.0321.00034	GCF_016070565.1	Bacillus thuringiensis	6300932	0	0	0
BATH001.0321.00035	GCF_003445395.2	Bacillus thuringiensis serovar israelensis	6700047	0	0	0
BATH001.0321.00036	GCF_013113775.1	Bacillus thuringiensis serovar israelensis	5100661	0	0	0
BATH001.0321.00037	GCF_001640965.1	Bacillus thuringiensis serovar alesti	5818118	0	0	0
BATH001.0321.00038	GCF_000940785.1	Bacillus thuringiensis serovar morrisoni	6179896	0	0	0
BATH001.0321.00039	GCF_001548175.1	Bacillus thuringiensis serovar tolworthi	6870591	0	0	0
BATH001.0321.00040	GCF_000803665.1	Bacillus thuringiensis serovar galleriae	6742233	0	0	0
BATH001.0321.00041	GCF_001183785.1	Bacillus thuringiensis serovar indiana	6198448	0	0	0
BATH001.0321.00042	GCF_000008505.1	[Bacillus thuringiensis] serovar konkukian str. 97-27	5314794	0	0	0
BATH001.0321.00043	GCF_000015065.1	Bacillus thuringiensis str. Al Hakam	5313030	0	0	0
BATH001.0321.00044	GCF_000306745.1	Bacillus thuringiensis Bt407	6134344	0	0	0
BATH001.0321.00045	GCF_000497525.1	Bacillus thuringiensis YBT-1518	6672921	0	0	0
BATH001.0321.00046	GCF_000193355.1	Bacillus thuringiensis serovar chinensis CT-43	6151150	0	0	0
BATH001.0321.00047	GCF_000688795.1	Bacillus thuringiensis serovar kurstaki str. YBT-1520	6580536	0	0	0
BATH001.0321.00048	GCF_000747545.1	Bacillus thuringiensis serovar kurstaki str. YBT-1520	6518351	0	0	0
BATH001.0321.00049	GCF_000092165.1	Bacillus thuringiensis BMB171	5643051	0	0	0
BATH001.0321.00050	GCF_000300475.1	Bacillus thuringiensis MC28	6694533	0	0	0
BATH001.0321.00051	GCF_000292705.1	Bacillus thuringiensis HD-789	6334630	0	0	0
BATH001.0321.00052	GCF_000292455.1	Bacillus thuringiensis HD-771	6438373	0	0	0
BATH001.0321.00053	GCF_000717535.1	Bacillus thuringiensis serovar kurstaki str. HD-1	6766594	0	0	0
BATH001.0321.00054	GCF_000338755.1	Bacillus thuringiensis serovar kurstaki str. HD73	5908575	0	0	0
BATH001.0321.00055	GCF_000341665.1	Bacillus thuringiensis serovar thuringiensis str. IS5056	6771593	0	0	0
BATH001.0321.00056	GCF_003546665.1	Bacillus thuringiensis LM1212	6320549	0	0	0
BATH001.0321.00057	GCF_001721165.1	Bacillus thuringiensis Bt18247	6138199	0	0	0
BATH001.0321.00058	GCF_000835025.1	Bacillus thuringiensis HD1002	6572702	0	0	0
BATH002.0321.00001	GCF_003711265.1	Bathymodiolus thermophilus thioautotrophic gill symbiont	2832685	0	3	0
BATH003.0321.00001	GCF_003096215.1	Bacillus thermoamylovorans	4016170	0	0	0
BATH004.0321.00001	GCF_001314975.1	Bacteroides thetaiotaomicron	6487685	0	0	0
BATH004.0321.00002	GCF_014131755.1	Bacteroides thetaiotaomicron	6304193	0	0	0
BATH004.0321.00003	GCF_000011065.1	Bacteroides thetaiotaomicron VPI-5482	6293399	0	0	0
BATO001.0321.00001	GCF_016605985.1	Bacillus toyonensis	5787787	0	0	0
BATO001.0321.00002	GCF_000496285.1	Bacillus toyonensis BCT-7112	5025419	0	0	0
BATR001.0321.00001	GCF_013331815.1	Bacillus tropicus	5297305	0	0	0
BATR001.0321.00002	GCF_016026855.1	Bacillus tropicus	5701560	0	0	0
BATR001.0321.00003	GCF_016027575.1	Bacillus tropicus	5716977	0	0	0
BATR002.0321.00001	GCF_000689355.1	Bartonella tribocorum	2631180	0	0	0
BATR002.0321.00002	GCF_000196435.1	Bartonella tribocorum CIP 105476	2642404	0	0	0
BAUN001.0321.00001	GCF_006742345.1	Bacteroides uniformis	4989532	0	0	0
BAVA001.0321.00001	GCF_002113805.1	Bacillus vallismortis	3929787	0	0	0
BAVA001.0321.00002	GCF_003667885.1	Bacillus vallismortis	3958372	0	0	0
BAVA001.0321.00003	GCF_004116955.1	Bacillus vallismortis	4286362	0	0	0
BAVE001.0321.00001	GCF_000015785.2	Bacillus velezensis FZB42	3918596	0	0	0
BAVE001.0321.00002	GCF_000769555.1	Bacillus velezensis	4014440	0	0	0
BAVE001.0321.00003	GCF_000815275.2	Bacillus velezensis	3933292	0	0	0
BAVE001.0321.00004	GCF_000833005.1	Bacillus velezensis	3905973	0	0	0
BAVE001.0321.00005	GCF_000973485.1	Bacillus velezensis	3903017	0	0	0
BAVE001.0321.00006	GCF_000987825.1	Bacillus velezensis	4105955	0	0	0
BAVE001.0321.00007	GCF_000988345.1	Bacillus velezensis	4006637	0	0	0
BAVE001.0321.00008	GCF_001023595.1	Bacillus velezensis	4009746	0	0	0
BAVE001.0321.00009	GCF_001536925.1	Bacillus velezensis	3862757	0	0	0
BAVE001.0321.00010	GCF_001593395.2	Bacillus velezensis	4167153	0	0	0
BAVE001.0321.00011	GCF_001685645.1	Bacillus velezensis	3929772	0	0	0
BAVE001.0321.00012	GCF_001687745.1	Bacillus velezensis	3917761	0	0	0
BAVE001.0321.00013	GCF_001723585.1	Bacillus velezensis	4007450	0	0	0
BAVE001.0321.00014	GCF_001752685.2	Bacillus velezensis	3921966	0	0	0
BAVE001.0321.00015	GCF_001854345.1	Bacillus velezensis	3884433	0	0	0
BAVE001.0321.00016	GCF_001857985.1	Bacillus velezensis	4241576	0	0	0
BAVE001.0321.00017	GCF_002005345.1	Bacillus velezensis	4143608	0	0	0
BAVE001.0321.00018	GCF_002057535.1	Bacillus velezensis	3926520	0	0	0
BAVE001.0321.00019	GCF_002072695.1	Bacillus velezensis	3929789	0	0	0
BAVE001.0321.00020	GCF_002105595.1	Bacillus velezensis	3963726	0	0	0
BAVE001.0321.00021	GCF_002117165.1	Bacillus velezensis	3929792	0	0	0
BAVE001.0321.00022	GCF_002157265.1	Bacillus velezensis	3922711	0	0	0
BAVE001.0321.00023	GCF_002192235.1	Bacillus velezensis	3929760	0	0	0
BAVE001.0321.00024	GCF_002205715.1	Bacillus velezensis	3900066	0	0	0
BAVE001.0321.00025	GCF_002216755.1	Bacillus velezensis	4020691	0	0	0
BAVE001.0321.00026	GCF_002237515.1	Bacillus velezensis	3979382	0	0	0
BAVE001.0321.00027	GCF_002238395.1	Bacillus velezensis	3872560	0	0	0
BAVE001.0321.00028	GCF_002243325.2	Bacillus velezensis	4162569	0	0	0
BAVE001.0321.00029	GCF_002310315.1	Bacillus velezensis	4085488	0	0	0
BAVE001.0321.00030	GCF_002327165.1	Bacillus velezensis	3989154	0	0	0
BAVE001.0321.00031	GCF_002556565.1	Bacillus velezensis	3972310	0	0	0
BAVE001.0321.00032	GCF_002688525.1	Bacillus velezensis	4090582	0	0	0
BAVE001.0321.00033	GCF_002741705.1	Bacillus velezensis	4197217	0	0	0
BAVE001.0321.00034	GCF_002761535.1	Bacillus velezensis	4006746	0	0	0
BAVE001.0321.00035	GCF_002764075.1	Bacillus velezensis	4061552	0	0	0
BAVE001.0321.00036	GCF_002796465.1	Bacillus velezensis	3995812	0	0	0
BAVE001.0321.00037	GCF_002844125.1	Bacillus velezensis	4246605	0	0	0
BAVE001.0321.00038	GCF_002845365.1	Bacillus velezensis	3928489	0	0	0
BAVE001.0321.00039	GCF_002850475.1	Bacillus velezensis	3975220	0	0	0
BAVE001.0321.00040	GCF_002893845.1	Bacillus velezensis	4339825	0	0	0
BAVE001.0321.00041	GCF_002944585.1	Bacillus velezensis	4328187	0	0	0
BAVE001.0321.00042	GCF_002968415.1	Bacillus velezensis	4385679	0	0	0
BAVE001.0321.00043	GCF_003045165.1	Bacillus velezensis	3929794	0	0	0
BAVE001.0321.00044	GCF_003047005.1	Bacillus velezensis	3893072	0	0	0
BAVE001.0321.00045	GCF_003047025.1	Bacillus velezensis	3893071	0	0	0
BAVE001.0321.00046	GCF_003047045.1	Bacillus velezensis	3893029	0	0	0
BAVE001.0321.00047	GCF_003071465.1	Bacillus velezensis	3975084	0	0	0
BAVE001.0321.00048	GCF_003073255.1	Bacillus velezensis	4233757	0	0	0
BAVE001.0321.00049	GCF_003073455.1	Bacillus velezensis	3947271	0	0	0
BAVE001.0321.00050	GCF_003076535.1	Bacillus velezensis	4013888	0	0	0
BAVE001.0321.00051	GCF_003150855.1	Bacillus velezensis	3913872	0	0	0
BAVE001.0321.00052	GCF_003265265.1	Bacillus velezensis	4237431	0	0	0
BAVE001.0321.00053	GCF_003285085.1	Bacillus velezensis	4321463	0	0	0
BAVE001.0321.00054	GCF_003390415.1	Bacillus velezensis	3919798	0	0	0
BAVE001.0321.00055	GCF_003431885.1	Bacillus velezensis	3929745	0	0	0
BAVE001.0321.00056	GCF_003432425.1	Bacillus velezensis	4047350	0	0	0
BAVE001.0321.00057	GCF_003546955.1	Bacillus velezensis	3978954	0	0	0
BAVE001.0321.00058	GCF_003555525.1	Bacillus velezensis	3929773	0	0	0
BAVE001.0321.00059	GCF_003573875.1	Bacillus velezensis	3974582	0	0	0
BAVE001.0321.00060	GCF_003612755.1	Bacillus velezensis	3929799	0	0	0
BAVE001.0321.00061	GCF_003667745.1	Bacillus velezensis	4234898	0	0	0
BAVE001.0321.00062	GCF_003721475.1	Bacillus velezensis	4074913	0	0	0
BAVE001.0321.00063	GCF_003854915.1	Bacillus velezensis	4141063	0	0	0
BAVE001.0321.00064	GCF_003855275.1	Bacillus velezensis	3713516	0	0	0
BAVE001.0321.00065	GCF_003860445.1	Bacillus velezensis	4118468	0	0	0
BAVE001.0321.00066	GCF_004101805.1	Bacillus velezensis	3997902	0	0	0
BAVE001.0321.00067	GCF_004119575.1	Bacillus velezensis	4139533	0	0	0
BAVE001.0321.00068	GCF_004119735.1	Bacillus velezensis	4144097	0	0	0
BAVE001.0321.00069	GCF_004119855.1	Bacillus velezensis	4235113	0	0	0
BAVE001.0321.00070	GCF_004329055.1	Bacillus velezensis	3929842	0	0	0
BAVE001.0321.00071	GCF_004337655.1	Bacillus velezensis	4076863	0	0	0
BAVE001.0321.00072	GCF_004799565.1	Bacillus velezensis	3947206	0	0	0
BAVE001.0321.00073	GCF_006489235.1	Bacillus velezensis	3983303	0	0	0
BAVE001.0321.00074	GCF_006489255.1	Bacillus velezensis	3983323	0	0	0
BAVE001.0321.00075	GCF_006489275.1	Bacillus velezensis	3888990	0	0	0
BAVE001.0321.00076	GCF_006965525.1	Bacillus velezensis	4063541	0	0	0
BAVE001.0321.00077	GCF_006974185.1	Bacillus velezensis	3929697	0	0	0
BAVE001.0321.00078	GCF_008244925.1	Bacillus velezensis	3934563	0	0	0
BAVE001.0321.00079	GCF_008367895.1	Bacillus velezensis	3915550	0	0	0
BAVE001.0321.00080	GCF_008727675.1	Bacillus velezensis	3995978	0	0	0
BAVE001.0321.00081	GCF_008802875.1	Bacillus velezensis	3929782	0	0	0
BAVE001.0321.00082	GCF_009362235.1	Bacillus velezensis	3929791	0	0	0
BAVE001.0321.00083	GCF_009663035.1	Bacillus velezensis	3894709	0	0	0
BAVE001.0321.00084	GCF_009664145.1	Bacillus velezensis	3984544	0	0	0
BAVE001.0321.00085	GCF_009738165.1	Bacillus velezensis	4004056	0	0	0
BAVE001.0321.00086	GCF_009789615.1	Bacillus velezensis	4035062	0	0	0
BAVE001.0321.00087	GCF_009834085.1	Bacillus velezensis	3986791	0	0	0
BAVE001.0321.00088	GCF_009856975.1	Bacillus velezensis	3966723	0	0	0
BAVE001.0321.00089	GCF_009913295.1	Bacillus velezensis	4044843	0	0	0
BAVE001.0321.00090	GCF_009913315.1	Bacillus velezensis	4018059	0	0	0
BAVE001.0321.00091	GCF_009913335.1	Bacillus velezensis	4018060	0	0	0
BAVE001.0321.00092	GCF_009913355.1	Bacillus velezensis	3963851	0	0	0
BAVE001.0321.00093	GCF_009913375.1	Bacillus velezensis	4100472	0	0	0
BAVE001.0321.00094	GCF_009913475.1	Bacillus velezensis	3963855	0	0	0
BAVE001.0321.00095	GCF_009913495.1	Bacillus velezensis	4100473	0	0	0
BAVE001.0321.00096	GCF_009914135.1	Bacillus velezensis	3971509	0	0	0
BAVE001.0321.00097	GCF_009914175.1	Bacillus velezensis	4088134	0	0	0
BAVE001.0321.00098	GCF_009931675.1	Bacillus velezensis	4050296	0	0	0
BAVE001.0321.00099	GCF_011032725.1	Bacillus velezensis	3907268	0	0	0
BAVE001.0321.00100	GCF_011100445.1	Bacillus velezensis	3929583	0	0	0
BAVE001.0321.00101	GCF_011769925.1	Bacillus velezensis	3929585	0	0	0
BAVE001.0321.00102	GCF_011784665.1	Bacillus velezensis	4065174	0	0	0
BAVE001.0321.00103	GCF_012226065.1	Bacillus velezensis	3889281	0	0	0
BAVE001.0321.00104	GCF_012275165.1	Bacillus velezensis	3905529	0	0	0
BAVE001.0321.00105	GCF_012647845.1	Bacillus velezensis	3980571	0	0	0
BAVE001.0321.00106	GCF_013122275.1	Bacillus velezensis	4029600	0	0	0
BAVE001.0321.00107	GCF_013201135.1	Bacillus velezensis	3929218	0	0	0
BAVE001.0321.00108	GCF_013201465.1	Bacillus velezensis	3908940	0	0	0
BAVE001.0321.00109	GCF_013348705.1	Bacillus velezensis	3922134	0	0	0
BAVE001.0321.00110	GCF_013367755.1	Bacillus velezensis	3929662	0	0	0
BAVE001.0321.00111	GCF_013401395.2	Bacillus velezensis	4003884	0	0	0
BAVE001.0321.00112	GCF_013694265.1	Bacillus velezensis	3917533	0	0	0
BAVE001.0321.00113	GCF_013701805.1	Bacillus velezensis	3927799	0	0	0
BAVE001.0321.00114	GCF_013875015.1	Bacillus velezensis	4191702	0	0	0
BAVE001.0321.00115	GCF_014048285.1	Bacillus velezensis	4065089	0	0	0
BAVE001.0321.00116	GCF_014048385.1	Bacillus velezensis	4136654	0	0	0
BAVE001.0321.00117	GCF_014117505.1	Bacillus velezensis	3890670	0	0	0
BAVE001.0321.00118	GCF_014180705.2	Bacillus velezensis	4141240	0	0	0
BAVE001.0321.00119	GCF_014211995.1	Bacillus velezensis	3894648	0	0	0
BAVE001.0321.00120	GCF_014358035.1	Bacillus velezensis	3980767	0	0	0
BAVE001.0321.00121	GCF_014495825.1	Bacillus velezensis	4068479	0	0	0
BAVE001.0321.00122	GCF_014622705.1	Bacillus velezensis	3929800	0	0	0
BAVE001.0321.00123	GCF_014706595.1	Bacillus velezensis	3969447	0	0	0
BAVE001.0321.00124	GCF_014764325.1	Bacillus velezensis	3891759	0	0	0
BAVE001.0321.00125	GCF_014841075.1	Bacillus velezensis	3929462	0	0	0
[truncated: 19,106 more rows]
