# Supplementary material for: IntegronFinder 2.0: Identification and Analysis of Integrons across Bacteria, with a Focus on Antibiotic Resistance in Klebsiella
Source: Microorganisms. 2022 Mar 24;10(4):700. doi: 10.3390/microorganisms10040700 (PMC9024848; doi:10.3390/microorganisms10040700)
Supplement: Supplementary file 1 [file microorganisms-10-00700-s001.zip › table_s2.xlsx]

## Sheet: Sheet1
isolate_name	assembly_id	size	nb_contigs	L90	#complete	#CALIN	#In0
KLPN.1018.00001	GCF_002814015.1	5320942	1	1	0	0	0
KLPN.1018.00002	GCF_000775955.1	5118878	1	1	0	0	0
KLPN.1018.00003	GCF_000813205.1	5329385	1	1	0	0	0
KLPN.1018.00004	GCF_002116885.1	5264852	1	1	0	0	0
KLPN.1018.00005	GCF_003286975.1	5214209	1	1	0	0	0
KLPN.1018.00006	GCF_002970895.1	5458646	1	1	0	0	0
KLPN.1018.00007	GCF_002753375.1	5354543	1	1	0	0	0
KLPN.1018.00008	GCF_001611055.1	5439720	1	1	0	0	0
KLPN.1018.00009	GCF_002269295.1	5456357	1	1	1	0	0
KLPN.1018.00010	GCF_001373075.1	5228056	1	1	0	0	0
KLPN.1018.00011	GCF_002761515.1	5316818	1	1	0	0	0
KLPN.1018.00012	GCF_001280925.1	5088873	1	1	0	0	0
KLPN.1018.00013	GCF_000294365.1	5386705	1	1	0	0	0
KLPN.1018.00014	GCF_900323945.1	5138672	1	1	0	0	0
KLPN.1018.00015	GCF_001746535.1	5344576	1	1	0	0	0
KLPN.1018.00016	GCF_000742755.1	5374834	1	1	0	0	0
KLPN.1018.00017	GCF_002850275.1	5333433	1	1	0	0	0
KLPN.1018.00018	GCF_002761315.1	5633290	1	1	0	0	0
KLPN.1018.00019	GCF_003285145.1	5377145	1	1	0	0	0
KLPN.1018.00020	GCF_000814805.1	5341039	1	1	0	0	0
KLPN.1018.00021	GCF_001708245.1	5412960	1	1	0	0	0
KLPN.1018.00022	GCF_002278055.1	5475860	1	1	1	0	0
KLPN.1018.00023	GCF_001463165.1	5491770	1	1	0	2	0
KLPN.1018.00024	GCF_001721725.1	5312744	1	1	0	0	0
KLPN.1018.00025	GCF_002209405.1	5332976	1	1	1	0	0
KLPN.1018.00026	GCF_001611095.1	5355459	1	1	0	1	0
KLPN.1018.00027	GCF_000474015.1	5166857	1	1	0	0	0
KLPN.1018.00028	GCF_003432185.1	5596264	2	1	0	0	0
KLPN.1018.00029	GCF_001663435.1	5536135	2	1	0	0	0
KLPN.1018.00030	GCF_003432265.1	5420229	2	1	0	0	0
KLPN.1018.00031	GCF_001936035.1	5387970	2	1	0	0	0
KLPN.1018.00032	GCF_003330945.1	5464719	2	1	0	0	0
KLPN.1018.00033	GCF_001708225.1	5587396	2	1	0	0	0
KLPN.1018.00034	GCF_900451725.1	5505946	2	1	0	0	0
KLPN.1018.00035	GCF_900451815.1	5633865	2	1	0	0	0
KLPN.1018.00036	GCF_002260725.1	5520764	2	1	0	0	0
KLPN.1018.00037	GCF_001663195.1	5420718	2	1	1	0	0
KLPN.1018.00038	GCF_002893825.1	5537629	2	1	1	0	0
KLPN.1018.00039	GCF_003367555.1	5682889	2	1	2	0	0
KLPN.1018.00040	GCF_001952835.1	5269768	2	1	1	0	0
KLPN.1018.00041	GCF_003597715.1	5570673	2	1	1	0	0
KLPN.1018.00042	GCF_000220485.1	5462423	2	1	0	0	0
KLPN.1018.00043	GCF_003186535.1	5380271	2	1	2	3	0
KLPN.1018.00044	GCF_900452095.1	5573752	2	1	0	0	0
KLPN.1018.00045	GCF_001530015.1	5450593	2	1	0	0	0
KLPN.1018.00046	GCF_001939885.2	5652219	2	1	0	0	0
KLPN.1018.00047	GCF_000009885.1	5472672	2	1	0	0	0
KLPN.1018.00048	GCF_002951555.1	5431353	2	1	2	0	0
KLPN.1018.00049	GCF_900452365.1	5443087	2	1	0	0	0
KLPN.1018.00050	GCF_001529935.1	5690826	2	1	0	0	0
KLPN.1018.00051	GCF_002813595.1	5716697	2	1	0	0	0
KLPN.1018.00052	GCF_000465975.2	5375667	2	1	0	0	0
KLPN.1018.00053	GCF_900451675.1	5295017	3	1	0	1	0
KLPN.1018.00054	GCF_001902435.1	5655658	3	1	2	0	0
KLPN.1018.00055	GCF_003225855.1	5663996	3	1	1	1	0
KLPN.1018.00056	GCF_002257935.3	5749649	3	1	1	0	0
KLPN.1018.00057	GCF_002833425.1	5741903	3	1	1	1	1
KLPN.1018.00058	GCF_003432245.1	5465612	3	1	0	0	0
KLPN.1018.00059	GCF_003571585.1	5547246	3	1	0	0	0
KLPN.1018.00060	GCF_003574275.1	5721798	3	1	1	3	0
KLPN.1018.00061	GCF_002753355.1	5519452	3	1	0	0	0
KLPN.1018.00062	GCF_003071305.1	5574787	3	1	3	0	0
KLPN.1018.00063	GCF_900451915.1	5543559	3	1	0	0	0
KLPN.1018.00064	GCF_003597695.1	5584541	3	1	1	0	0
KLPN.1018.00065	GCF_001902355.1	5778578	3	1	0	2	0
KLPN.1018.00066	GCF_003181135.1	5482460	3	1	1	1	0
KLPN.1018.00067	GCF_002812385.1	5743591	3	1	0	0	0
KLPN.1018.00068	GCF_003204175.1	5626400	3	1	0	0	0
KLPN.1018.00069	GCF_003076555.1	5359558	3	1	2	0	0
KLPN.1018.00070	GCF_003324315.1	5467978	3	1	0	0	0
KLPN.1018.00071	GCF_003030045.1	5709497	3	1	2	0	0
KLPN.1018.00072	GCF_002951595.1	5708729	3	1	2	1	0
KLPN.1018.00073	GCF_000717515.1	5436785	3	1	0	0	0
KLPN.1018.00074	GCF_003432205.1	5419864	3	1	0	0	0
KLPN.1018.00075	GCF_002812365.1	5633657	3	1	0	0	0
KLPN.1018.00076	GCF_002948565.1	5733600	3	1	0	4	1
KLPN.1018.00077	GCF_000968155.1	5655684	3	1	0	0	0
KLPN.1018.00078	GCF_900452445.1	5312206	3	1	0	0	0
KLPN.1018.00079	GCF_003054385.1	5579775	3	1	1	0	0
KLPN.1018.00080	GCF_001676825.1	5495471	3	1	0	0	0
KLPN.1018.00081	GCF_003226095.1	5393129	3	1	0	0	0
KLPN.1018.00082	GCF_003432145.1	5505832	3	1	0	0	0
KLPN.1018.00083	GCF_003267985.1	5794565	3	1	2	3	0
KLPN.1018.00084	GCF_003571545.1	5525412	3	1	3	1	0
KLPN.1018.00085	GCF_003432285.1	5456823	3	1	0	0	0
KLPN.1018.00086	GCF_003574235.1	5656491	3	1	2	3	0
KLPN.1018.00087	GCF_001704235.1	5558458	3	1	4	0	0
KLPN.1018.00088	GCF_000739495.1	5510332	3	1	1	1	0
KLPN.1018.00089	GCF_900451875.1	5528186	3	1	1	0	0
KLPN.1018.00090	GCF_001482345.1	5406866	3	1	0	0	0
KLPN.1018.00091	GCF_001316565.3	5846356	3	1	1	1	0
KLPN.1018.00092	GCF_001307175.1	5696051	3	1	1	2	0
KLPN.1018.00093	GCF_000783515.2	5546838	3	1	0	0	0
KLPN.1018.00094	GCF_001521895.1	5535187	3	1	1	0	0
KLPN.1018.00095	GCF_002752905.1	5448674	3	1	0	0	0
KLPN.1018.00096	GCF_000784945.1	5520596	3	1	1	1	0
KLPN.1018.00097	GCF_003335025.1	5624217	3	1	0	0	0
KLPN.1018.00098	GCF_001908895.1	5526153	3	1	1	1	0
KLPN.1018.00099	GCF_003226115.1	5645210	3	1	0	1	1
KLPN.1018.00100	GCF_001952875.1	5435802	3	1	1	1	0
KLPN.1018.00101	GCF_000445405.1	5603174	3	1	1	0	0
KLPN.1018.00102	GCF_001471625.1	5594695	3	1	1	0	0
KLPN.1018.00103	GCF_002202275.1	5658318	3	1	1	1	0
KLPN.1018.00104	GCF_000709225.1	5541575	4	1	1	0	0
KLPN.1018.00105	GCF_003428845.1	5884898	4	1	2	3	0
KLPN.1018.00106	GCF_002787755.1	5707921	4	1	2	0	1
KLPN.1018.00107	GCF_000775395.1	5858308	4	1	2	1	0
KLPN.1018.00108	GCF_001709295.1	5483848	4	1	1	0	0
KLPN.1018.00109	GCF_003288375.1	5709342	4	1	1	0	0
KLPN.1018.00110	GCF_002852995.2	5498332	4	1	0	0	0
KLPN.1018.00111	GCF_000709185.1	5481808	4	1	1	0	0
KLPN.1018.00112	GCF_002180175.1	5746129	4	1	1	1	0
KLPN.1018.00113	GCF_003030145.1	5535332	4	1	1	2	0
KLPN.1018.00114	GCF_001022035.1	5552491	4	1	0	1	0
KLPN.1018.00115	GCF_000417225.2	5710688	4	1	1	1	0
KLPN.1018.00116	GCF_003037615.2	5570198	4	1	1	0	0
KLPN.1018.00117	GCF_003225775.1	5471057	4	1	1	1	0
KLPN.1018.00118	GCF_001648215.1	5566588	4	1	1	1	0
KLPN.1018.00119	GCF_001922465.1	5779484	4	1	2	1	0
KLPN.1018.00120	GCF_002055855.1	5884778	4	1	1	3	0
KLPN.1018.00121	GCF_002192315.1	5598174	4	1	2	0	0
KLPN.1018.00122	GCF_003031345.1	5640638	4	1	1	0	0
KLPN.1018.00123	GCF_002211905.1	5816577	4	1	1	0	0
KLPN.1018.00124	GCF_003432405.1	5588848	4	1	2	0	0
KLPN.1018.00125	GCF_001902255.1	5594981	4	1	2	0	0
KLPN.1018.00126	GCF_002260885.1	5533083	4	1	0	0	0
KLPN.1018.00127	GCF_000597905.1	5417216	4	1	0	0	0
KLPN.1018.00128	GCF_002258145.3	5500843	4	1	1	0	0
KLPN.1018.00129	GCF_000807395.2	5620801	4	1	2	0	0
KLPN.1018.00130	GCF_002164835.3	5670138	4	1	1	0	0
KLPN.1018.00131	GCF_001887985.3	5632871	4	1	0	0	0
KLPN.1018.00132	GCF_900451555.1	5663077	4	1	0	0	0
KLPN.1018.00133	GCF_001663455.1	5730336	4	1	0	0	0
KLPN.1018.00134	GCF_001705385.1	5803735	4	1	2	0	0
KLPN.1018.00135	GCF_000785005.1	5473580	4	1	1	1	0
KLPN.1018.00136	GCF_000417265.2	5523776	4	1	0	0	0
KLPN.1018.00137	GCF_003432225.1	5523973	4	1	1	0	0
KLPN.1018.00138	GCF_000281535.2	5766615	4	1	2	0	0
KLPN.1018.00139	GCF_003225835.1	5867240	4	1	2	0	0
KLPN.1018.00140	GCF_003286995.1	5768926	4	1	1	0	0
KLPN.1018.00141	GCF_003069525.1	5799475	4	1	3	4	0
KLPN.1018.00142	GCF_000775375.1	5695223	4	1	1	1	0
KLPN.1018.00143	GCF_002369925.1	5824783	4	1	0	0	0
KLPN.1018.00144	GCF_000981845.1	5648826	4	1	0	2	0
KLPN.1018.00145	GCF_003073315.1	5479509	4	1	2	0	0
KLPN.1018.00146	GCF_900451655.1	5543766	4	1	0	0	0
KLPN.1018.00147	GCF_001750805.1	5759206	4	1	1	0	0
KLPN.1018.00148	GCF_000784985.1	5484149	4	1	1	0	0
KLPN.1018.00149	GCF_002156785.1	5973075	4	1	3	2	0
KLPN.1018.00150	GCF_000709165.1	5495790	4	1	0	0	0
KLPN.1018.00151	GCF_900451865.1	5439082	4	1	0	0	0
KLPN.1018.00152	GCF_002587885.1	5769651	4	1	2	1	0
KLPN.1018.00153	GCF_001675125.1	5681468	4	1	2	0	0
KLPN.1018.00154	GCF_000714675.1	5734564	4	1	3	0	0
KLPN.1018.00155	GCF_003194325.1	5561616	4	1	3	0	0
KLPN.1018.00156	GCF_002243445.1	5621950	4	1	0	0	0
KLPN.1018.00157	GCF_001663295.1	5779669	4	1	0	0	0
KLPN.1018.00158	GCF_002249975.1	5814263	4	1	1	0	0
KLPN.1018.00159	GCF_002156725.1	5896654	4	1	2	0	0
KLPN.1018.00160	GCF_003037325.2	5533074	4	1	0	0	0
KLPN.1018.00161	GCF_002163895.1	5918670	4	1	0	0	0
KLPN.1018.00162	GCF_001887995.2	5461882	4	1	0	0	0
KLPN.1018.00163	GCF_000567225.2	5399523	5	1	1	0	0
KLPN.1018.00164	GCF_900461375.1	5298668	5	1	0	0	0
KLPN.1018.00165	GCF_002007665.1	5804304	5	1	2	0	0
KLPN.1018.00166	GCF_002197225.1	5995730	5	1	2	0	0
KLPN.1018.00167	GCF_002944845.1	5782903	5	1	2	0	0
KLPN.1018.00168	GCF_900451445.1	5774474	5	1	1	0	0
KLPN.1018.00169	GCF_002056475.1	5708390	5	1	3	0	0
KLPN.1018.00170	GCF_002754835.1	5698065	5	1	1	1	0
KLPN.1018.00171	GCF_002852945.2	5653617	5	1	2	0	0
KLPN.1018.00172	GCF_000709205.1	5763973	5	1	2	1	0
KLPN.1018.00173	GCF_000807515.1	5705808	5	1	3	1	0
KLPN.1018.00174	GCF_001741545.1	5798553	5	1	2	0	0
KLPN.1018.00175	GCF_001956965.1	5869161	5	1	1	0	0
KLPN.1018.00176	GCF_001902195.1	5778465	5	1	1	0	0
KLPN.1018.00177	GCF_002848585.1	5899407	5	1	1	0	0
KLPN.1018.00178	GCF_002180315.1	5989257	5	1	1	3	0
KLPN.1018.00179	GCF_001316945.3	5953825	5	1	2	2	0
KLPN.1018.00180	GCF_002202215.1	5656270	5	1	1	1	0
KLPN.1018.00181	GCF_002180075.1	5774316	5	1	2	0	0
KLPN.1018.00182	GCF_001456095.3	5650490	5	1	1	0	0
KLPN.1018.00183	GCF_001902535.1	5513536	5	1	1	0	1
KLPN.1018.00184	GCF_002587165.1	5880984	5	1	2	0	0
KLPN.1018.00185	GCF_002811325.2	5641106	5	1	2	0	0
KLPN.1018.00186	GCF_003584585.1	5848881	5	1	1	1	0
KLPN.1018.00187	GCF_000417085.2	5663117	5	1	1	0	0
KLPN.1018.00188	GCF_900451185.1	5701470	5	1	0	0	0
KLPN.1018.00189	GCF_001902395.1	5676522	5	1	1	1	0
KLPN.1018.00190	GCF_000406765.2	5547643	5	1	0	0	0
KLPN.1018.00191	GCF_003194285.1	5391141	5	1	1	1	0
KLPN.1018.00192	GCF_001855315.1	5718854	5	1	3	2	0
KLPN.1018.00193	GCF_002056385.1	5666107	5	1	3	0	0
KLPN.1018.00194	GCF_003074015.1	5675659	5	1	2	1	0
KLPN.1018.00195	GCF_003402495.1	5855782	5	1	1	1	0
KLPN.1018.00196	GCF_900451355.1	5658687	5	1	0	0	0
KLPN.1018.00197	GCF_002192375.1	5708112	5	1	2	1	0
KLPN.1018.00198	GCF_001022235.1	5620516	5	1	1	1	0
KLPN.1018.00199	GCF_900451385.1	5522819	5	1	0	0	0
KLPN.1018.00200	GCF_003181055.1	5657209	5	1	0	2	1
KLPN.1018.00201	GCF_001456055.3	5680634	5	1	1	0	0
KLPN.1018.00202	GCF_000474885.1	5794564	5	1	1	0	0
KLPN.1018.00203	GCF_000814305.1	5649912	5	1	3	0	0
KLPN.1018.00204	GCF_001902235.1	5811538	5	1	1	0	0
KLPN.1018.00205	GCF_001908715.1	5379063	5	1	0	0	0
KLPN.1018.00206	GCF_002164855.2	5610557	5	1	2	0	0
KLPN.1018.00207	GCF_002211665.1	5745028	5	1	1	1	0
KLPN.1018.00208	GCF_002202255.1	5798614	5	1	2	1	0
KLPN.1018.00209	GCF_002951635.1	5550639	5	1	0	0	0
KLPN.1018.00210	GCF_002848545.1	5859831	5	1	1	0	0
KLPN.1018.00211	GCF_900451745.1	5693271	5	1	0	0	1
KLPN.1018.00212	GCF_002811335.3	5752334	5	1	3	0	0
KLPN.1018.00213	GCF_002848565.1	5845963	5	1	2	0	0
KLPN.1018.00214	GCF_001534855.2	5584592	5	1	0	0	0
KLPN.1018.00215	GCF_002202195.1	6054276	5	1	3	0	0
KLPN.1018.00216	GCF_001908595.1	5916317	6	1	1	1	0
KLPN.1018.00217	GCF_900461445.1	5421263	6	1	0	0	0
KLPN.1018.00218	GCF_003571645.1	5703725	6	1	2	1	0
KLPN.1018.00219	GCF_002180155.1	5859680	6	1	2	0	0
KLPN.1018.00220	GCF_900451755.1	5599284	6	1	0	0	0
KLPN.1018.00221	GCF_002753035.1	5677989	6	1	1	0	0
KLPN.1018.00222	GCF_002180295.1	5835823	6	1	1	0	0
KLPN.1018.00223	GCF_001952915.1	6063895	6	1	1	0	0
KLPN.1018.00224	GCF_900451455.1	5225216	6	1	0	0	0
KLPN.1018.00225	GCF_001456135.1	5874698	6	1	1	2	0
KLPN.1018.00226	GCF_003571525.1	5595201	6	1	3	0	0
KLPN.1018.00227	GCF_001644765.1	6088457	6	1	2	0	1
KLPN.1018.00228	GCF_900451615.1	5433803	6	1	0	0	0
KLPN.1018.00229	GCF_002903005.1	6209759	6	1	0	0	0
KLPN.1018.00230	GCF_002591075.1	5752865	6	1	0	2	0
KLPN.1018.00231	GCF_002753605.1	5732200	6	1	1	2	1
KLPN.1018.00232	GCF_002853435.2	5852348	6	1	2	0	0
KLPN.1018.00233	GCF_000474865.1	5738068	6	1	3	0	0
KLPN.1018.00234	GCF_003571745.1	5768716	6	1	1	1	0
KLPN.1018.00235	GCF_001913175.1	5627728	6	1	1	2	0
KLPN.1018.00236	GCF_002156745.1	5965284	6	1	2	1	0
KLPN.1018.00237	GCF_002202235.1	5782129	6	1	2	1	0
KLPN.1018.00238	GCF_000598005.1	5540936	6	1	1	2	0
KLPN.1018.00239	GCF_002258055.2	5848374	6	1	1	0	0
KLPN.1018.00240	GCF_002055765.1	5838292	6	1	2	1	0
KLPN.1018.00241	GCF_003413505.1	5652029	6	1	1	0	0
KLPN.1018.00242	GCF_002197505.1	5726558	6	1	2	1	0
KLPN.1018.00243	GCF_002852975.2	5896594	6	1	2	0	0
KLPN.1018.00244	GCF_002635725.1	5606744	6	1	1	1	0
KLPN.1018.00245	GCF_003590665.1	5596986	6	1	0	0	0
KLPN.1018.00246	GCF_000474905.1	5751366	6	1	2	0	0
KLPN.1018.00247	GCF_003031325.1	5947820	6	1	2	0	0
KLPN.1018.00248	GCF_001022175.1	5810009	6	1	1	2	0
KLPN.1018.00249	GCF_003038215.2	5909803	6	1	1	1	0
KLPN.1018.00250	GCF_000016305.1	5694894	6	1	1	1	0
KLPN.1018.00251	GCF_002812665.1	6067344	6	1	2	1	0
KLPN.1018.00252	GCF_002752815.1	5684599	7	1	1	1	0
KLPN.1018.00253	GCF_002636375.1	5727717	7	1	1	2	0
KLPN.1018.00254	GCF_002636095.1	5625903	7	1	1	1	0
KLPN.1018.00255	GCF_003402995.1	5879323	7	1	2	0	0
KLPN.1018.00256	GCF_001908515.1	5752260	7	1	1	0	0
KLPN.1018.00257	GCF_001952895.1	5880908	7	1	3	2	0
KLPN.1018.00258	GCF_000240185.1	5682322	7	1	1	0	0
KLPN.1018.00259	GCF_002753165.1	5702263	7	1	1	2	1
KLPN.1018.00260	GCF_003429545.1	5805104	7	1	2	1	0
KLPN.1018.00261	GCF_001741665.1	5880491	7	1	3	0	0
KLPN.1018.00262	GCF_002588365.1	5550288	7	1	0	0	0
KLPN.1018.00263	GCF_000512165.1	5739888	7	1	1	1	0
KLPN.1018.00264	GCF_001455995.1	5980203	7	1	2	0	1
KLPN.1018.00265	GCF_003073235.1	5617050	7	1	1	1	0
KLPN.1018.00266	GCF_002636215.1	5789969	7	1	3	2	0
KLPN.1018.00267	GCF_900451515.1	5401424	7	1	0	0	0
KLPN.1018.00268	GCF_001874715.1	5737283	8	1	0	0	0
KLPN.1018.00269	GCF_001471835.2	5980029	8	1	2	0	0
KLPN.1018.00270	GCF_002636515.1	5951576	8	1	1	0	0
KLPN.1018.00271	GCF_003006175.1	5752275	8	1	1	1	0
KLPN.1018.00272	GCF_900451595.1	5587086	8	1	0	0	0
KLPN.1018.00273	GCF_003432165.1	6109915	8	1	1	0	0
KLPN.1018.00274	GCF_002968495.1	5597784	8	1	2	0	0
KLPN.1018.00275	GCF_002752955.1	5717053	8	1	0	0	0
KLPN.1018.00276	GCF_001902415.1	5584283	9	1	2	1	0
KLPN.1018.00277	GCF_003056445.1	5778569	10	1	1	1	0
KLPN.1018.00278	GCF_000764635.1	5563121	11	1	1	0	0
KLPN.1018.00279	GCF_000599905.1	5894762	12	1	1	0	0
KLPN.1018.00280	GCF_001008725.1	5821835	12	1	2	1	0
KLPN.1018.00281	GCF_003037165.1	5678800	24	1	0	1	0
KLPN.1018.00282	GCF_003226035.1	5388526	30	1	0	0	0
KLPN.1018.00283	GCF_002148835.1	5750668	4	2	1	0	0
KLPN.1018.00284	GCF_000764615.1	5990738	5	2	1	1	0
KLPN.1018.00285	GCF_002180255.1	5806817	5	2	2	1	0
KLPN.1018.00286	GCF_000695935.1	6132443	6	2	3	0	1
KLPN.1018.00287	GCF_001875025.1	5886119	6	2	1	1	0
KLPN.1018.00288	GCF_003443755.1	5977633	6	2	2	0	0
KLPN.1018.00289	GCF_003112125.1	5945288	6	2	2	0	0
KLPN.1018.00290	GCF_003010735.1	5651305	6	2	2	1	0
KLPN.1018.00291	GCF_900451315.1	5589625	7	2	0	0	0
KLPN.1018.00292	GCF_002935085.1	6296819	7	2	0	0	0
KLPN.1018.00293	GCF_900451605.1	5712240	7	2	0	0	0
KLPN.1018.00294	GCF_003571605.1	5961854	7	2	3	0	0
KLPN.1018.00295	GCF_001902335.1	5851286	7	2	0	1	0
KLPN.1018.00296	GCF_003571705.1	5924827	7	2	2	1	0
KLPN.1018.00297	GCF_900451425.1	5337427	8	2	0	0	0
KLPN.1018.00298	GCF_001875055.2	5741326	8	2	2	0	0
KLPN.1018.00299	GCF_000694475.2	5714481	8	2	1	1	0
KLPN.1018.00300	GCF_000567765.2	5740715	9	2	2	0	0
KLPN.1018.00301	GCF_001874695.1	5565288	9	2	3	1	0
KLPN.1018.00302	GCF_900461475.1	5603228	9	2	0	0	0
KLPN.1018.00303	GCF_002753015.1	6025713	11	2	1	0	0
KLPN.1018.00304	GCF_002968475.1	5892020	11	2	3	0	0
KLPN.1018.00305	GCF_001875075.1	5653598	12	2	2	0	0
KLPN.1018.00306	GCF_001874725.1	5894793	12	2	2	0	0
KLPN.1018.00307	GCF_001874875.1	5628665	14	2	4	0	0
KLPN.1018.00308	GCF_900069965.1	5869288	15	2	1	0	0
KLPN.1018.00309	GCF_003225815.1	6008660	28	2	0	0	0
KLPN.1018.00310	GCF_003226215.1	5803223	38	2	1	1	0
KLPN.1018.00311	GCF_001875045.2	5753666	10	3	1	1	0
KLPN.1018.00312	GCF_001875135.1	5543609	10	3	1	2	0
KLPN.1018.00313	GCF_003225795.1	5902400	14	3	1	1	0
KLPN.1018.00314	GCF_001874865.1	6017882	15	3	0	0	0
KLPN.1018.00315	GCF_000694835.1	5427094	16	3	0	1	0
KLPN.1018.00316	GCF_000807475.1	5602072	16	3	3	1	0
KLPN.1018.00317	GCF_003334895.1	5980299	26	3	3	1	0
KLPN.1018.00318	GCF_000566985.1	5417365	11	4	0	2	0
KLPN.1018.00319	GCF_000567505.1	5684642	15	4	1	0	0
KLPN.1018.00320	GCF_003335065.1	6030181	23	4	2	1	0
KLPN.1018.00321	GCF_003410395.1	5909425	28	4	2	0	0
KLPN.1018.00322	GCF_000567525.1	5743485	10	5	0	0	1
KLPN.1018.00323	GCF_000493135.1	5372112	10	5	0	0	0
KLPN.1018.00324	GCF_900452045.1	5594577	10	5	0	0	0
KLPN.1018.00325	GCF_000567485.1	5486956	12	5	0	0	0
KLPN.1018.00326	GCF_001034005.1	5582566	13	5	0	0	0
KLPN.1018.00327	GCF_000694135.1	5670707	13	5	0	0	0
KLPN.1018.00328	GCF_900172635.1	5222310	16	5	0	0	0
KLPN.1018.00329	GCF_000694915.1	5736771	20	5	0	0	1
KLPN.1018.00330	GCF_001907955.1	5311340	20	5	1	1	0
KLPN.1018.00331	GCF_000693055.1	6011046	20	5	2	1	0
KLPN.1018.00332	GCF_000694895.1	5573086	27	5	1	0	0
KLPN.1018.00333	GCF_002738115.1	5696698	10	6	1	1	0
KLPN.1018.00334	GCF_001031705.1	5842026	13	6	2	1	0
KLPN.1018.00335	GCF_000492635.1	5343678	15	6	0	0	0
KLPN.1018.00336	GCF_001031065.1	5862429	16	6	1	0	0
KLPN.1018.00337	GCF_000694395.1	5901546	18	6	1	1	0
KLPN.1018.00338	GCF_001034135.1	5630558	18	6	1	0	0
KLPN.1018.00339	GCF_000693255.1	5654989	18	6	1	0	0
KLPN.1018.00340	GCF_000567325.1	5875989	23	6	1	0	0
KLPN.1018.00341	GCF_001875125.1	6102611	25	6	2	0	0
KLPN.1018.00342	GCF_900093205.1	5497232	26	6	1	1	0
KLPN.1018.00343	GCF_001033535.1	5498707	27	6	0	0	0
KLPN.1018.00344	GCF_000694095.1	5748753	28	6	1	0	0
KLPN.1018.00345	GCF_900093265.1	5557603	31	6	1	1	0
KLPN.1018.00346	GCF_900493485.1	5235961	49	6	0	1	0
KLPN.1018.00347	GCF_900093235.1	5380403	55	6	0	0	0
KLPN.1018.00348	GCF_000958955.1	5368188	58	6	1	2	0
KLPN.1018.00349	GCF_000958975.1	5494465	68	6	1	2	0
KLPN.1018.00350	GCF_900451395.1	5532074	14	7	0	0	0
KLPN.1018.00351	GCF_001031485.1	5794079	14	7	0	0	0
KLPN.1018.00352	GCF_000567845.1	5316857	14	7	0	0	0
KLPN.1018.00353	GCF_000566885.1	5331802	15	7	0	0	0
KLPN.1018.00354	GCF_900173815.1	5117021	15	7	0	0	0
KLPN.1018.00355	GCF_000567305.1	5645280	15	7	1	1	0
KLPN.1018.00356	GCF_900174395.1	5040353	16	7	0	0	0
KLPN.1018.00357	GCF_001033205.1	5670006	16	7	0	0	0
KLPN.1018.00358	GCF_000492375.1	5433456	16	7	0	0	0
KLPN.1018.00359	GCF_001031325.1	5334659	19	7	0	1	0
KLPN.1018.00360	GCF_000566925.1	5648335	20	7	2	0	0
KLPN.1018.00361	GCF_001032855.1	5639436	22	7	2	0	0
KLPN.1018.00362	GCF_000441835.1	5798488	23	7	2	0	0
KLPN.1018.00363	GCF_000692975.1	5756609	26	7	1	0	0
KLPN.1018.00364	GCF_000567825.1	5709176	29	7	0	0	0
KLPN.1018.00365	GCF_000694755.1	5738468	30	7	1	1	0
KLPN.1018.00366	GCF_000694795.1	5730401	31	7	0	1	0
KLPN.1018.00367	GCF_900512295.1	5087652	31	7	0	0	0
KLPN.1018.00368	GCF_000693455.1	5455860	33	7	0	2	0
KLPN.1018.00369	GCF_900092865.1	5351233	35	7	1	0	0
KLPN.1018.00370	GCF_001033765.1	5244674	14	8	0	0	0
KLPN.1018.00371	GCF_000492535.1	5481608	16	8	0	0	0
KLPN.1018.00372	GCF_000567685.1	5432371	17	8	1	1	0
KLPN.1018.00373	GCF_000567185.1	5364728	18	8	0	0	0
KLPN.1018.00374	GCF_001031155.1	5803407	19	8	2	1	0
KLPN.1018.00375	GCF_001034245.1	5950767	19	8	1	1	0
KLPN.1018.00376	GCF_001185685.1	5791398	20	8	1	0	0
KLPN.1018.00377	GCF_000694695.1	5452671	20	8	0	0	0
KLPN.1018.00378	GCF_001031385.1	5752416	21	8	2	1	0
KLPN.1018.00379	GCF_001033245.1	5582494	23	8	1	1	0
KLPN.1018.00380	GCF_900493445.1	5138289	23	8	0	0	0
KLPN.1018.00381	GCF_000694215.1	5733931	24	8	1	0	0
KLPN.1018.00382	GCF_000693915.1	5690819	27	8	2	0	0
KLPN.1018.00383	GCF_900092795.1	5299897	28	8	0	0	0
KLPN.1018.00384	GCF_000566865.1	5772685	29	8	1	0	0
KLPN.1018.00385	GCF_000692935.1	5520778	30	8	1	0	0
KLPN.1018.00386	GCF_900171855.1	5399548	31	8	1	0	0
KLPN.1018.00387	GCF_000706585.1	5706600	33	8	1	0	0
KLPN.1018.00388	GCF_000693955.1	5680824	33	8	1	2	0
KLPN.1018.00389	GCF_900093285.1	5623574	35	8	1	0	0
KLPN.1018.00390	GCF_900172435.1	5403178	35	8	1	0	0
KLPN.1018.00391	GCF_900508695.1	5244875	37	8	0	0	0
KLPN.1018.00392	GCF_900494145.1	5281179	42	8	0	0	0
KLPN.1018.00393	GCF_002775455.1	5359398	47	8	0	0	0
KLPN.1018.00394	GCF_900494245.1	5319024	48	8	0	0	0
KLPN.1018.00395	GCF_900172595.1	5453624	49	8	0	1	0
KLPN.1018.00396	GCF_900093065.1	5663354	91	8	0	3	1
KLPN.1018.00397	GCF_000567145.1	5286683	13	9	0	0	0
KLPN.1018.00398	GCF_000492315.1	5436933	15	9	0	0	0
KLPN.1018.00399	GCF_001033615.1	5628153	16	9	0	0	0
KLPN.1018.00400	GCF_001034235.1	5482303	17	9	0	0	0
KLPN.1018.00401	GCF_001031865.1	5549694	18	9	1	0	0
KLPN.1018.00402	GCF_000492335.1	5369746	20	9	0	0	0
KLPN.1018.00403	GCF_000566785.1	5723536	22	9	0	0	0
KLPN.1018.00404	GCF_000693875.1	5865534	22	9	1	0	0
KLPN.1018.00405	GCF_000492395.1	5476589	23	9	0	0	0
KLPN.1018.00406	GCF_001186065.1	5684581	23	9	0	1	0
KLPN.1018.00407	GCF_000694815.1	5361398	24	9	0	0	0
KLPN.1018.00408	GCF_000567465.1	5543045	25	9	1	0	0
KLPN.1018.00409	GCF_900092995.1	5423389	26	9	0	0	0
KLPN.1018.00410	GCF_000694255.1	5775137	27	9	1	1	0
KLPN.1018.00411	GCF_000693595.1	5759759	27	9	1	0	0
KLPN.1018.00412	GCF_002861845.1	5102002	28	9	0	0	0
KLPN.1018.00413	GCF_900492765.1	5568935	29	9	0	0	0
KLPN.1018.00414	GCF_900093075.1	5538638	30	9	0	0	0
KLPN.1018.00415	GCF_000693335.1	5626629	31	9	0	1	0
KLPN.1018.00416	GCF_001033915.1	5597034	32	9	0	1	0
KLPN.1018.00417	GCF_900172055.1	5347873	34	9	1	0	0
KLPN.1018.00418	GCF_900092875.1	5607147	34	9	0	1	0
KLPN.1018.00419	GCF_900493415.1	5573905	40	9	1	0	0
KLPN.1018.00420	GCF_900092725.1	5365936	42	9	1	1	0
KLPN.1018.00421	GCF_900172105.1	5547019	44	9	0	0	0
KLPN.1018.00422	GCF_900501845.1	5353760	45	9	0	0	0
KLPN.1018.00423	GCF_900510025.1	5497350	46	9	1	1	0
KLPN.1018.00424	GCF_900092805.1	5739363	48	9	1	1	0
KLPN.1018.00425	GCF_900092825.1	5443391	52	9	1	0	0
KLPN.1018.00426	GCF_900493945.1	5232781	53	9	0	0	0
KLPN.1018.00427	GCF_000693135.1	5941571	55	9	1	0	0
KLPN.1018.00428	GCF_900494205.1	5310066	56	9	1	0	0
KLPN.1018.00429	GCF_900093335.1	5609386	78	9	0	0	0
KLPN.1018.00430	GCF_000492295.1	5195569	16	10	0	0	0
KLPN.1018.00431	GCF_000492555.1	5454475	17	10	0	0	0
KLPN.1018.00432	GCF_001033525.1	5447386	18	10	1	1	0
KLPN.1018.00433	GCF_000807495.1	5508625	19	10	2	0	0
KLPN.1018.00434	GCF_001032665.1	5820037	20	10	1	1	0
KLPN.1018.00435	GCF_000694935.1	5416872	22	10	0	0	0
KLPN.1018.00436	GCF_001034085.1	5573350	22	10	0	1	0
KLPN.1018.00437	GCF_000521985.1	5332034	23	10	0	0	0
KLPN.1018.00438	GCF_000567585.1	5538128	23	10	2	0	0
KLPN.1018.00439	GCF_000566805.1	5741233	23	10	1	0	0
KLPN.1018.00440	GCF_001030935.1	5795129	23	10	2	1	0
KLPN.1018.00441	GCF_000567085.1	5475803	24	10	0	0	0
KLPN.1018.00442	GCF_900493255.1	5382039	24	10	0	0	0
KLPN.1018.00443	GCF_001031235.1	5818573	25	10	1	1	0
KLPN.1018.00444	GCF_000693975.1	5847511	27	10	1	1	0
KLPN.1018.00445	GCF_001034325.1	5748717	27	10	1	1	2
KLPN.1018.00446	GCF_003334965.1	5905672	28	10	2	1	0
KLPN.1018.00447	GCF_001185925.1	5825270	29	10	2	1	0
KLPN.1018.00448	GCF_900509875.1	5214926	30	10	0	0	0
KLPN.1018.00449	GCF_000567365.1	5904365	31	10	2	0	0
KLPN.1018.00450	GCF_001033565.1	5709957	31	10	1	0	0
KLPN.1018.00451	GCF_900511225.1	5103838	33	10	0	0	0
KLPN.1018.00452	GCF_000693635.1	5873699	34	10	0	1	1
KLPN.1018.00453	GCF_900513235.1	5356849	34	10	0	0	0
KLPN.1018.00454	GCF_000694855.1	5615089	35	10	1	0	0
KLPN.1018.00455	GCF_900506955.1	5467786	38	10	0	0	0
KLPN.1018.00456	GCF_900511715.1	5424770	38	10	1	1	0
KLPN.1018.00457	GCF_900093275.1	5386167	39	10	0	0	0
KLPN.1018.00458	GCF_900515175.1	5553180	42	10	1	0	0
KLPN.1018.00459	GCF_900493195.1	5505976	43	10	1	0	0
KLPN.1018.00460	GCF_900512565.1	5492869	45	10	1	0	0
KLPN.1018.00461	GCF_900513115.1	5338481	46	10	0	0	0
KLPN.1018.00462	GCF_900494685.1	5416453	46	10	0	0	0
KLPN.1018.00463	GCF_900508615.1	5538392	48	10	1	0	0
KLPN.1018.00464	GCF_900093165.1	5664617	69	10	1	1	0
KLPN.1018.00465	GCF_001938035.1	5635623	83	10	1	1	0
KLPN.1018.00466	GCF_900504745.1	5217304	93	10	0	0	0
KLPN.1018.00467	GCF_900498365.1	5718908	160	10	0	0	0
KLPN.1018.00468	GCF_900514565.1	5466544	208	10	0	0	0
KLPN.1018.00469	GCF_001033335.1	5629811	18	11	2	1	0
KLPN.1018.00470	GCF_000492935.1	5538364	18	11	0	0	0
KLPN.1018.00471	GCF_001032615.1	5602496	19	11	1	1	0
KLPN.1018.00472	GCF_000693075.1	5234458	19	11	0	0	0
KLPN.1018.00473	GCF_000567065.1	5321739	19	11	0	0	0
KLPN.1018.00474	GCF_000566845.1	5605961	20	11	0	0	0
KLPN.1018.00475	GCF_000567105.1	5440381	20	11	0	0	0
KLPN.1018.00476	GCF_001033745.1	5456728	20	11	1	0	0
KLPN.1018.00477	GCF_000566765.1	5483093	20	11	0	0	0
KLPN.1018.00478	GCF_900093375.1	5278439	20	11	1	1	0
KLPN.1018.00479	GCF_000567625.1	5567069	24	11	1	2	0
KLPN.1018.00480	GCF_001031675.1	5855559	24	11	2	1	0
KLPN.1018.00481	GCF_001185895.1	5675914	24	11	2	1	0
KLPN.1018.00482	GCF_001032585.1	5658961	24	11	2	1	0
KLPN.1018.00483	GCF_000567045.1	5594082	25	11	1	0	1
KLPN.1018.00484	GCF_001033835.1	5875723	25	11	3	0	0
KLPN.1018.00485	GCF_001031405.1	5868896	28	11	1	0	0
KLPN.1018.00486	GCF_000693555.1	5833657	28	11	1	1	0
KLPN.1018.00487	GCF_900174295.1	5280880	29	11	0	0	0
KLPN.1018.00488	GCF_000300735.3	5771908	30	11	1	1	0
KLPN.1018.00489	GCF_900492935.1	5132786	31	11	0	0	0
KLPN.1018.00490	GCF_000567425.1	5680430	32	11	0	0	0
KLPN.1018.00491	GCF_000706605.1	5790510	32	11	2	0	0
KLPN.1018.00492	GCF_900493425.1	5233095	32	11	0	0	0
KLPN.1018.00493	GCF_900514425.1	5236186	33	11	0	0	0
KLPN.1018.00494	GCF_900093325.1	5267200	33	11	0	0	0
KLPN.1018.00495	GCF_900092885.1	5401746	34	11	1	1	0
KLPN.1018.00496	GCF_001032145.1	5627508	34	11	0	1	0
KLPN.1018.00497	GCF_900510155.1	5607654	35	11	0	0	0
KLPN.1018.00498	GCF_000694435.1	5723238	35	11	1	0	0
KLPN.1018.00499	GCF_900493325.1	5210869	36	11	0	0	0
KLPN.1018.00500	GCF_900173325.1	5306436	36	11	1	0	0
KLPN.1018.00501	GCF_900510455.1	5203227	37	11	0	0	0
KLPN.1018.00502	GCF_900502275.1	5343147	37	11	0	0	0
KLPN.1018.00503	GCF_900510435.1	5402545	38	11	1	0	0
KLPN.1018.00504	GCF_900493165.1	5320874	40	11	1	0	0
KLPN.1018.00505	GCF_900512475.1	5172491	41	11	0	0	0
KLPN.1018.00506	GCF_900093155.1	5273074	41	11	1	1	0
KLPN.1018.00507	GCF_900506665.1	5562336	42	11	1	0	0
KLPN.1018.00508	GCF_900512725.1	5519375	42	11	1	0	0
KLPN.1018.00509	GCF_900508215.1	5399938	42	11	1	1	0
KLPN.1018.00510	GCF_900173115.1	5534142	46	11	1	1	0
KLPN.1018.00511	GCF_900493275.1	5524249	49	11	1	1	0
KLPN.1018.00512	GCF_900172675.1	5581749	49	11	1	1	0
KLPN.1018.00513	GCF_900493745.1	5488332	49	11	0	1	0
KLPN.1018.00514	GCF_900511435.1	5325541	49	11	1	1	0
KLPN.1018.00515	GCF_900508035.1	5387748	52	11	0	0	0
KLPN.1018.00516	GCF_900498745.1	5273982	55	11	0	0	0
KLPN.1018.00517	GCF_900513515.1	5473280	58	11	0	0	1
KLPN.1018.00518	GCF_900498905.1	5372838	60	11	0	0	0
KLPN.1018.00519	GCF_900509115.1	5556226	62	11	1	1	0
KLPN.1018.00520	GCF_002775525.1	5393493	67	11	0	0	0
KLPN.1018.00521	GCF_900171935.1	5557215	68	11	1	0	0
KLPN.1018.00522	GCF_900092675.1	5578783	71	11	0	1	0
KLPN.1018.00523	GCF_900517355.1	5151957	73	11	0	0	0
KLPN.1018.00524	GCF_002775325.1	5176616	74	11	0	0	0
KLPN.1018.00525	GCF_900172015.1	5497581	75	11	1	0	0
KLPN.1018.00526	GCF_900512035.1	5462316	78	11	1	1	0
KLPN.1018.00527	GCF_002775495.1	5411006	79	11	1	0	0
KLPN.1018.00528	GCF_900513075.1	5356888	88	11	0	0	0
KLPN.1018.00529	GCF_900498615.1	5606740	98	11	0	0	0
KLPN.1018.00530	GCF_900515495.1	5456366	98	11	1	0	0
KLPN.1018.00531	GCF_900507295.1	5123180	105	11	0	0	0
KLPN.1018.00532	GCF_000493115.1	5238942	17	12	0	0	0
KLPN.1018.00533	GCF_001033675.1	5505113	19	12	1	0	0
KLPN.1018.00534	GCF_001031175.1	5678691	21	12	2	1	0
KLPN.1018.00535	GCF_001034285.1	5553189	21	12	0	0	0
KLPN.1018.00536	GCF_001033925.1	5509691	21	12	0	0	1
KLPN.1018.00537	GCF_001031245.1	5497317	21	12	0	0	0
KLPN.1018.00538	GCF_001031895.1	5280155	22	12	1	0	0
KLPN.1018.00539	GCF_001032275.1	5917498	22	12	2	1	0
KLPN.1018.00540	GCF_000300655.1	5516480	23	12	0	0	0
KLPN.1018.00541	GCF_002870885.1	5622743	23	12	0	0	0
KLPN.1018.00542	GCF_000492735.1	5533872	23	12	0	0	0
KLPN.1018.00543	GCF_900174245.1	5302617	24	12	0	0	0
KLPN.1018.00544	GCF_001034165.1	5711038	26	12	2	0	0
KLPN.1018.00545	GCF_001033415.1	5530688	26	12	1	1	0
KLPN.1018.00546	GCF_000694635.1	5672468	26	12	0	0	0
KLPN.1018.00547	GCF_001031185.1	5799469	26	12	1	1	0
KLPN.1018.00548	GCF_000281755.1	5512347	27	12	0	0	0
KLPN.1018.00549	GCF_001032375.1	5914743	29	12	2	1	0
KLPN.1018.00550	GCF_001034305.1	5555265	29	12	0	0	0
KLPN.1018.00551	GCF_000566965.1	5515839	30	12	0	0	0
KLPN.1018.00552	GCF_001032925.1	5927537	30	12	2	1	0
KLPN.1018.00553	GCF_001032875.1	5555528	30	12	2	1	0
KLPN.1018.00554	GCF_000567565.1	5697556	32	12	0	0	0
KLPN.1018.00555	GCF_900173615.1	5354184	33	12	0	0	0
KLPN.1018.00556	GCF_002412175.1	5297941	39	12	0	0	0
KLPN.1018.00557	GCF_900492895.1	5370817	40	12	1	0	0
KLPN.1018.00558	GCF_900507445.1	5058919	40	12	0	0	0
KLPN.1018.00559	GCF_900092855.1	5411591	40	12	1	1	0
KLPN.1018.00560	GCF_000694355.1	5899541	41	12	2	1	0
KLPN.1018.00561	GCF_900093315.1	5383540	41	12	1	1	0
KLPN.1018.00562	GCF_900513025.1	5340255	42	12	0	0	0
KLPN.1018.00563	GCF_900512505.1	5221800	42	12	0	0	0
KLPN.1018.00564	GCF_900510945.1	5463449	45	12	1	1	0
KLPN.1018.00565	GCF_900493475.1	5172788	46	12	0	0	0
KLPN.1018.00566	GCF_900173585.1	5481624	47	12	0	0	0
KLPN.1018.00567	GCF_900494305.1	5092302	47	12	0	0	0
KLPN.1018.00568	GCF_900510985.1	5449490	48	12	0	0	0
KLPN.1018.00569	GCF_900493855.1	5214637	50	12	0	0	0
KLPN.1018.00570	GCF_900514175.1	5333809	51	12	0	0	0
KLPN.1018.00571	GCF_900517145.1	5467012	51	12	0	0	0
KLPN.1018.00572	GCF_900508825.1	5447249	51	12	0	0	0
KLPN.1018.00573	GCF_900493125.1	5508731	52	12	1	1	0
KLPN.1018.00574	GCF_900494035.1	5390625	52	12	0	0	0
KLPN.1018.00575	GCF_900494725.1	5261595	52	12	0	0	0
KLPN.1018.00576	GCF_900510815.1	5397318	53	12	0	0	0
KLPN.1018.00577	GCF_900506075.1	5346500	53	12	1	1	0
KLPN.1018.00578	GCF_900093095.1	5531262	53	12	1	1	0
KLPN.1018.00579	GCF_900502535.1	5654663	54	12	0	0	0
KLPN.1018.00580	GCF_900517715.1	5385722	54	12	0	0	0
KLPN.1018.00581	GCF_900512825.1	5396772	55	12	0	0	0
KLPN.1018.00582	GCF_900512305.1	5469628	55	12	1	0	0
KLPN.1018.00583	GCF_900493205.1	5533449	55	12	1	1	0
KLPN.1018.00584	GCF_900514905.1	5326647	56	12	0	0	0
KLPN.1018.00585	GCF_900512205.1	5418803	56	12	0	0	0
KLPN.1018.00586	GCF_900496825.1	5524505	57	12	0	2	0
KLPN.1018.00587	GCF_900493515.1	5220848	58	12	0	0	0
KLPN.1018.00588	GCF_900511505.1	5500561	58	12	0	2	0
KLPN.1018.00589	GCF_900493925.1	5544337	61	12	1	1	0
KLPN.1018.00590	GCF_002866545.1	5399456	61	12	1	2	0
KLPN.1018.00591	GCF_900512945.1	5441691	62	12	1	1	0
KLPN.1018.00592	GCF_900494355.1	5603086	62	12	0	0	1
KLPN.1018.00593	GCF_900503045.1	5360626	62	12	0	0	0
KLPN.1018.00594	GCF_900515235.1	5511745	65	12	1	1	0
KLPN.1018.00595	GCF_900502375.1	5462874	65	12	0	0	0
KLPN.1018.00596	GCF_900504455.1	5621792	66	12	0	2	0
KLPN.1018.00597	GCF_900494135.1	5467114	67	12	0	0	0
KLPN.1018.00598	GCF_900171865.1	5546560	68	12	1	0	0
KLPN.1018.00599	GCF_900492905.1	5547617	68	12	1	1	0
KLPN.1018.00600	GCF_900508265.1	5200019	70	12	0	0	0
KLPN.1018.00601	GCF_900515065.1	5461208	72	12	1	1	0
KLPN.1018.00602	GCF_000498775.2	5627144	85	12	1	1	0
KLPN.1018.00603	GCF_900515205.1	5475431	87	12	0	0	0
KLPN.1018.00604	GCF_900513155.1	5452516	90	12	0	0	0
KLPN.1018.00605	GCF_900517105.1	5096972	91	12	0	0	0
KLPN.1018.00606	GCF_900512635.1	5616746	98	12	1	0	0
KLPN.1018.00607	GCF_900517415.1	5581666	100	12	0	0	0
KLPN.1018.00608	GCF_900514985.1	5422802	115	12	0	0	0
KLPN.1018.00609	GCF_003036735.1	5555927	125	12	0	1	1
KLPN.1018.00610	GCF_900506185.1	5213517	143	12	0	0	0
KLPN.1018.00611	GCF_900502335.1	5570147	212	12	0	0	0
KLPN.1018.00612	GCF_900508655.1	5638428	235	12	0	0	0
KLPN.1018.00613	GCF_900506925.1	5602142	256	12	0	0	0
KLPN.1018.00614	GCF_900507435.1	5507300	436	12	0	1	0
KLPN.1018.00615	GCF_900504615.1	5523804	437	12	0	0	0
KLPN.1018.00616	GCF_900510925.1	5556028	530	12	0	0	0
KLPN.1018.00617	GCF_000492915.1	5592516	20	13	0	0	0
KLPN.1018.00618	GCF_000566905.1	5529588	20	13	1	0	0
KLPN.1018.00619	GCF_001034205.1	5571786	21	13	0	0	0
KLPN.1018.00620	GCF_000492595.1	5539871	22	13	1	0	0
KLPN.1018.00621	GCF_001034155.1	5367700	22	13	0	0	0
KLPN.1018.00622	GCF_000692955.1	5347398	23	13	0	0	0
KLPN.1018.00623	GCF_001033365.1	5829425	23	13	2	1	0
KLPN.1018.00624	GCF_001033465.1	5396256	23	13	0	0	0
KLPN.1018.00625	GCF_001031145.1	5711716	24	13	1	1	0
KLPN.1018.00626	GCF_000492355.1	5479597	25	13	1	0	0
KLPN.1018.00627	GCF_001032845.1	5795648	25	13	1	0	0
KLPN.1018.00628	GCF_001032185.1	5421519	26	13	1	0	0
KLPN.1018.00629	GCF_001185665.1	5983808	26	13	0	1	0
KLPN.1018.00630	GCF_001033725.1	5484485	26	13	0	1	0
KLPN.1018.00631	GCF_001033045.1	5878299	27	13	2	0	0
KLPN.1018.00632	GCF_000567405.1	5562105	27	13	1	1	2
KLPN.1018.00633	GCF_900173805.1	5156771	29	13	0	0	0
KLPN.1018.00634	GCF_000694875.1	5390412	30	13	0	0	0
KLPN.1018.00635	GCF_000567545.1	5595687	31	13	1	0	0
KLPN.1018.00636	GCF_001034295.1	5577028	32	13	1	1	0
KLPN.1018.00637	GCF_000694655.1	5604713	35	13	2	1	0
KLPN.1018.00638	GCF_900505995.1	5175772	37	13	0	0	0
KLPN.1018.00639	GCF_900093815.1	5411457	39	13	0	1	0
KLPN.1018.00640	GCF_900507535.1	5384974	39	13	1	0	0
KLPN.1018.00641	GCF_900508055.1	5443178	39	13	0	0	0
KLPN.1018.00642	GCF_900093115.1	5409861	39	13	1	1	0
KLPN.1018.00643	GCF_900510585.1	5237042	39	13	0	0	0
KLPN.1018.00644	GCF_900093455.1	5311536	39	13	0	0	0
KLPN.1018.00645	GCF_900173125.1	5410239	39	13	1	1	0
KLPN.1018.00646	GCF_900508755.1	5633982	41	13	0	1	1
KLPN.1018.00647	GCF_000694495.1	5459773	41	13	0	0	1
KLPN.1018.00648	GCF_001185915.1	5587028	43	13	0	2	0
KLPN.1018.00649	GCF_900508195.1	5345348	46	13	0	0	0
KLPN.1018.00650	GCF_900173045.1	5476721	47	13	1	0	0
KLPN.1018.00651	GCF_900515165.1	5427787	47	13	0	0	0
KLPN.1018.00652	GCF_000981955.1	5423780	47	13	0	2	0
KLPN.1018.00653	GCF_900511995.1	5107950	48	13	0	0	0
KLPN.1018.00654	GCF_900507245.1	5525747	48	13	1	0	0
KLPN.1018.00655	GCF_900512985.1	5209896	48	13	0	0	0
KLPN.1018.00656	GCF_900492835.1	5367508	49	13	1	1	0
KLPN.1018.00657	GCF_900511365.1	5499346	50	13	0	2	0
KLPN.1018.00658	GCF_900512625.1	5498764	50	13	0	1	0
KLPN.1018.00659	GCF_900493655.1	5503667	50	13	0	0	0
KLPN.1018.00660	GCF_900087895.1	5366702	50	13	0	0	0
KLPN.1018.00661	GCF_900093105.1	5662443	51	13	0	1	1
KLPN.1018.00662	GCF_900493295.1	5496690	51	13	1	1	0
KLPN.1018.00663	GCF_900513765.1	5432016	51	13	0	0	0
KLPN.1018.00664	GCF_900493455.1	5377566	53	13	1	0	0
KLPN.1018.00665	GCF_900514505.1	5453828	53	13	1	0	0
KLPN.1018.00666	GCF_900503985.1	5306650	54	13	0	0	0
KLPN.1018.00667	GCF_900494285.1	5251979	55	13	0	0	0
KLPN.1018.00668	GCF_900092705.1	5515801	56	13	0	1	0
KLPN.1018.00669	GCF_900516125.1	5502155	56	13	0	0	0
KLPN.1018.00670	GCF_900513635.1	5421387	57	13	1	1	0
KLPN.1018.00671	GCF_900093125.1	5736621	58	13	1	1	0
KLPN.1018.00672	GCF_900507805.1	5436811	58	13	0	0	0
KLPN.1018.00673	GCF_900513535.1	5458422	58	13	0	2	0
KLPN.1018.00674	GCF_900511675.1	5383481	59	13	1	0	0
KLPN.1018.00675	GCF_900512045.1	5335847	61	13	0	0	0
KLPN.1018.00676	GCF_900493615.1	5616899	63	13	1	1	0
KLPN.1018.00677	GCF_900508545.1	5347193	63	13	0	0	0
KLPN.1018.00678	GCF_900511285.1	5646727	65	13	1	1	0
KLPN.1018.00679	GCF_900496885.1	5573945	66	13	0	0	0
KLPN.1018.00680	GCF_900498575.1	5311949	66	13	0	0	0
KLPN.1018.00681	GCF_900512465.1	5382110	66	13	0	0	0
KLPN.1018.00682	GCF_900494115.1	5486280	66	13	0	0	0
KLPN.1018.00683	GCF_900517215.1	5481151	66	13	0	0	0
KLPN.1018.00684	GCF_900498725.1	5343203	67	13	0	0	0
KLPN.1018.00685	GCF_900511595.1	5438152	68	13	1	1	0
KLPN.1018.00686	GCF_900513625.1	5388661	69	13	0	0	0
KLPN.1018.00687	GCF_900498975.1	5156059	71	13	0	0	0
KLPN.1018.00688	GCF_900513555.1	5373695	72	13	1	0	0
KLPN.1018.00689	GCF_900092835.1	5579478	76	13	1	0	0
KLPN.1018.00690	GCF_900498815.1	5591290	82	13	0	0	0
KLPN.1018.00691	GCF_003036445.1	5379737	85	13	0	0	0
KLPN.1018.00692	GCF_002775595.1	5598362	89	13	1	1	0
KLPN.1018.00693	GCF_900504705.1	5353839	92	13	0	0	0
KLPN.1018.00694	GCF_900508625.1	5624855	96	13	1	1	0
KLPN.1018.00695	GCF_900506415.1	5312648	115	13	0	0	0
KLPN.1018.00696	GCF_900501075.1	5579880	129	13	0	0	0
KLPN.1018.00697	GCF_900092935.1	5905348	153	13	0	0	1
KLPN.1018.00698	GCF_900504295.1	5294343	158	13	0	0	0
KLPN.1018.00699	GCF_003037975.1	5616428	231	13	0	2	1
KLPN.1018.00700	GCF_900501055.1	5577460	517	13	0	0	0
KLPN.1018.00701	GCF_000567605.1	5510987	21	14	2	0	0
KLPN.1018.00702	GCF_001034365.1	5451171	21	14	0	0	0
KLPN.1018.00703	GCF_001031795.1	5552472	24	14	1	0	0
KLPN.1018.00704	GCF_001032425.1	5506184	25	14	0	0	0
KLPN.1018.00705	GCF_000567645.1	5586925	25	14	1	0	0
KLPN.1018.00706	GCF_001032025.1	5857948	26	14	2	1	0
KLPN.1018.00707	GCF_000492695.1	5522901	26	14	0	0	0
KLPN.1018.00708	GCF_001031635.1	5852410	26	14	2	1	0
KLPN.1018.00709	GCF_000492875.1	5545032	26	14	0	0	0
KLPN.1018.00710	GCF_001031825.1	5717070	27	14	2	1	0
KLPN.1018.00711	GCF_900084875.1	5081007	28	14	0	1	0
KLPN.1018.00712	GCF_001032815.1	5374215	29	14	1	1	1
KLPN.1018.00713	GCF_001033885.1	5876773	30	14	2	0	0
KLPN.1018.00714	GCF_001031305.1	5928693	32	14	2	1	0
KLPN.1018.00715	GCF_000492215.1	5537707	33	14	0	0	0
KLPN.1018.00716	GCF_000707985.1	5852267	35	14	1	2	0
KLPN.1018.00717	GCF_900510825.1	5377748	36	14	0	0	0
KLPN.1018.00718	GCF_000694675.1	5478855	36	14	0	0	0
KLPN.1018.00719	GCF_001030995.1	5570213	37	14	0	3	0
KLPN.1018.00720	GCF_900492885.1	5308497	37	14	0	0	0
KLPN.1018.00721	GCF_000693235.1	5851156	37	14	0	1	0
KLPN.1018.00722	GCF_900171815.1	5424634	38	14	0	0	0
KLPN.1018.00723	GCF_900506655.1	5415768	38	14	0	0	0
KLPN.1018.00724	GCF_000982215.1	5437510	38	14	1	1	0
KLPN.1018.00725	GCF_900506465.1	5327143	39	14	0	1	0
KLPN.1018.00726	GCF_900511805.1	5291344	40	14	0	0	0
KLPN.1018.00727	GCF_900504565.1	5218471	41	14	0	0	0
KLPN.1018.00728	GCF_900508665.1	5215198	43	14	0	0	0
KLPN.1018.00729	GCF_900093245.1	5428718	44	14	0	0	0
KLPN.1018.00730	GCF_900509935.1	5230349	45	14	0	0	0
KLPN.1018.00731	GCF_900508685.1	5338269	45	14	0	0	0
KLPN.1018.00732	GCF_900503145.1	5316963	45	14	0	0	0
KLPN.1018.00733	GCF_900093425.1	5493982	45	14	1	0	0
KLPN.1018.00734	GCF_900511455.1	5190980	46	14	0	0	0
KLPN.1018.00735	GCF_900509975.1	5538183	47	14	0	0	1
KLPN.1018.00736	GCF_900503615.1	5267808	48	14	0	0	0
KLPN.1018.00737	GCF_900503725.1	5402142	49	14	0	0	0
KLPN.1018.00738	GCF_001032265.1	5836266	49	14	1	0	0
KLPN.1018.00739	GCF_900504805.1	5579846	51	14	1	1	0
KLPN.1018.00740	GCF_900508785.1	5447140	51	14	0	0	0
KLPN.1018.00741	GCF_900512675.1	5255710	51	14	0	0	0
KLPN.1018.00742	GCF_000773875.1	5469353	52	14	1	2	0
KLPN.1018.00743	GCF_900093015.1	5604912	52	14	1	0	0
KLPN.1018.00744	GCF_900493815.1	5191989	52	14	0	0	0
KLPN.1018.00745	GCF_900511575.1	5403672	52	14	1	1	0
KLPN.1018.00746	GCF_900501345.1	5544295	52	14	0	0	0
KLPN.1018.00747	GCF_900493725.1	5544189	53	14	0	0	0
KLPN.1018.00748	GCF_900507355.1	5482784	54	14	1	1	0
KLPN.1018.00749	GCF_900511235.1	5374994	54	14	0	0	0
KLPN.1018.00750	GCF_900515995.1	5354825	55	14	0	0	0
KLPN.1018.00751	GCF_900511935.1	5285373	55	14	0	0	0
KLPN.1018.00752	GCF_900502545.1	5263386	58	14	0	0	0
KLPN.1018.00753	GCF_900494165.1	5414581	60	14	0	0	0
KLPN.1018.00754	GCF_900507965.1	5512816	63	14	1	1	0
KLPN.1018.00755	GCF_900498795.1	5493180	64	14	0	0	0
KLPN.1018.00756	GCF_900500755.1	5483203	64	14	1	2	0
KLPN.1018.00757	GCF_900513655.1	5491048	65	14	1	0	0
KLPN.1018.00758	GCF_900173885.1	5331146	65	14	1	0	0
KLPN.1018.00759	GCF_900512755.1	5267385	67	14	0	0	0
KLPN.1018.00760	GCF_900512395.1	5691236	71	14	0	0	0
KLPN.1018.00761	GCF_900503685.1	5432164	72	14	1	1	0
KLPN.1018.00762	GCF_002775445.1	5566232	72	14	1	0	0
KLPN.1018.00763	GCF_900093175.1	5634149	74	14	0	1	0
KLPN.1018.00764	GCF_900510115.1	5391661	76	14	0	0	0
KLPN.1018.00765	GCF_900514405.1	5580894	76	14	0	1	0
KLPN.1018.00766	GCF_900508745.1	5650691	79	14	0	1	1
KLPN.1018.00767	GCF_002866505.1	5536507	80	14	1	1	0
KLPN.1018.00768	GCF_900498675.1	5438932	87	14	0	0	0
KLPN.1018.00769	GCF_003038115.1	5569046	91	14	1	1	0
KLPN.1018.00770	GCF_900510885.1	5580562	92	14	1	1	0
KLPN.1018.00771	GCF_900505615.1	5458988	98	14	1	2	0
KLPN.1018.00772	GCF_900507475.1	5548897	100	14	1	1	0
KLPN.1018.00773	GCF_900092975.1	5993703	103	14	1	0	0
KLPN.1018.00774	GCF_900503665.1	5664477	116	14	0	1	0
KLPN.1018.00775	GCF_900517015.1	5349513	133	14	0	0	0
KLPN.1018.00776	GCF_900507265.1	5419488	134	14	1	1	0
KLPN.1018.00777	GCF_003037335.1	5565610	148	14	0	2	1
KLPN.1018.00778	GCF_900504835.1	5450091	154	14	1	0	0
KLPN.1018.00779	GCF_900501115.1	5619562	171	14	0	0	0
KLPN.1018.00780	GCF_900507735.1	5553606	235	14	0	0	0
KLPN.1018.00781	GCF_900508235.1	5543750	311	14	1	1	0
KLPN.1018.00782	GCF_900504315.1	5586555	383	14	0	0	0
KLPN.1018.00783	GCF_001030945.1	5546974	25	15	1	0	0
KLPN.1018.00784	GCF_001032205.1	5307518	25	15	1	0	0
KLPN.1018.00785	GCF_001033445.1	5436749	25	15	0	0	0
KLPN.1018.00786	GCF_000567725.1	5719437	26	15	0	1	0
KLPN.1018.00787	GCF_900086495.1	4993429	26	15	0	0	0
KLPN.1018.00788	GCF_000567125.1	5322522	27	15	1	0	0
KLPN.1018.00789	GCF_001032775.1	5652832	30	15	1	0	0
KLPN.1018.00790	GCF_000492515.1	5366899	30	15	0	1	0
KLPN.1018.00791	GCF_001033505.1	5507099	31	15	0	0	0
KLPN.1018.00792	GCF_002870905.1	5581820	31	15	0	0	0
KLPN.1018.00793	GCF_001032115.1	5862124	34	15	2	1	0
KLPN.1018.00794	GCF_001031545.1	5936954	34	15	1	0	0
KLPN.1018.00795	GCF_000693115.1	5506915	36	15	0	0	0
KLPN.1018.00796	GCF_001032455.1	5765927	38	15	1	1	0
KLPN.1018.00797	GCF_002269865.1	5544311	40	15	1	0	0
KLPN.1018.00798	GCF_000693775.1	5791101	40	15	1	1	0
KLPN.1018.00799	GCF_000693415.1	5857459	40	15	1	3	0
KLPN.1018.00800	GCF_900515355.1	5407467	40	15	0	0	0
KLPN.1018.00801	GCF_000694715.1	5549605	40	15	0	0	0
KLPN.1018.00802	GCF_000567285.1	5700122	41	15	1	1	0
KLPN.1018.00803	GCF_900515895.1	5490025	41	15	0	1	0
KLPN.1018.00804	GCF_900515845.1	5218611	41	15	0	0	0
KLPN.1018.00805	GCF_000694035.1	5931862	41	15	1	1	0
KLPN.1018.00806	GCF_900492985.1	5398818	42	15	1	0	0
KLPN.1018.00807	GCF_900493465.1	5355423	43	15	1	0	0
KLPN.1018.00808	GCF_900512705.1	5243796	44	15	0	0	0
KLPN.1018.00809	GCF_002210445.1	5691415	44	15	0	0	0
KLPN.1018.00810	GCF_900510035.1	5333910	44	15	0	0	0
KLPN.1018.00811	GCF_900511165.1	5290550	45	15	0	0	0
KLPN.1018.00812	GCF_900093085.1	5469050	45	15	1	0	0
KLPN.1018.00813	GCF_001701585.1	5526987	45	15	0	1	0
KLPN.1018.00814	GCF_900501475.1	5385304	46	15	0	0	0
KLPN.1018.00815	GCF_900511545.1	5301349	48	15	0	0	0
KLPN.1018.00816	GCF_002851495.1	5427945	48	15	1	0	0
KLPN.1018.00817	GCF_900494605.1	5522248	48	15	0	0	0
KLPN.1018.00818	GCF_900092965.1	5626354	49	15	1	0	0
KLPN.1018.00819	GCF_900509125.1	5290909	49	15	1	0	0
KLPN.1018.00820	GCF_900493265.1	5368987	50	15	0	0	0
KLPN.1018.00821	GCF_900501425.1	5413260	50	15	1	0	0
KLPN.1018.00822	GCF_900509995.1	5428758	50	15	1	0	0
KLPN.1018.00823	GCF_900505005.1	5370136	50	15	1	1	0
KLPN.1018.00824	GCF_900093135.1	5539914	51	15	0	1	0
KLPN.1018.00825	GCF_900510005.1	5397152	51	15	0	0	0
KLPN.1018.00826	GCF_900492915.1	5492031	52	15	1	1	0
KLPN.1018.00827	GCF_900512225.1	5288354	52	15	0	0	0
KLPN.1018.00828	GCF_900509905.1	5610031	53	15	0	0	0
KLPN.1018.00829	GCF_900507655.1	5205385	54	15	0	0	0
KLPN.1018.00830	GCF_900515815.1	5242232	55	15	0	0	0
KLPN.1018.00831	GCF_900511605.1	5342610	55	15	0	0	0
KLPN.1018.00832	GCF_900493915.1	5352153	56	15	0	0	0
KLPN.1018.00833	GCF_900494025.1	5683225	56	15	0	0	0
KLPN.1018.00834	GCF_900500865.1	5298962	57	15	0	0	0
KLPN.1018.00835	GCF_900517045.1	5476524	57	15	1	0	0
KLPN.1018.00836	GCF_900172955.1	5433535	58	15	1	1	0
KLPN.1018.00837	GCF_900501285.1	5379760	59	15	0	0	0
KLPN.1018.00838	GCF_900514235.1	5645564	59	15	0	0	0
KLPN.1018.00839	GCF_900506025.1	5254413	60	15	0	0	0
KLPN.1018.00840	GCF_900493935.1	5575492	60	15	1	0	0
KLPN.1018.00841	GCF_900514165.1	5619409	60	15	1	0	0
KLPN.1018.00842	GCF_002866665.1	5342423	61	15	0	0	0
KLPN.1018.00843	GCF_900513595.1	5716627	61	15	1	1	0
KLPN.1018.00844	GCF_900498655.1	5561980	62	15	0	0	0
KLPN.1018.00845	GCF_900501625.1	5664606	62	15	0	1	0
KLPN.1018.00846	GCF_900508985.1	5398678	64	15	1	1	0
KLPN.1018.00847	GCF_900516655.1	5699681	65	15	1	1	0
KLPN.1018.00848	GCF_900517385.1	5699910	65	15	1	1	0
KLPN.1018.00849	GCF_900501615.1	5391334	67	15	0	2	1
KLPN.1018.00850	GCF_900510125.1	5590268	67	15	0	0	0
KLPN.1018.00851	GCF_900516175.1	5469114	67	15	0	0	0
KLPN.1018.00852	GCF_900501595.1	5754277	67	15	0	1	1
KLPN.1018.00853	GCF_002775375.1	5407419	68	15	0	0	0
KLPN.1018.00854	GCF_900506575.1	5682609	68	15	1	1	0
KLPN.1018.00855	GCF_900493545.1	5583666	69	15	0	0	0
KLPN.1018.00856	GCF_900512905.1	5706083	70	15	1	1	0
KLPN.1018.00857	GCF_900492845.1	5683978	73	15	1	0	0
KLPN.1018.00858	GCF_900493285.1	5545282	73	15	1	1	0
KLPN.1018.00859	GCF_002776435.1	5277710	74	15	0	0	0
KLPN.1018.00860	GCF_900498335.1	5239223	75	15	0	0	0
KLPN.1018.00861	GCF_900501435.1	5611112	76	15	1	0	0
KLPN.1018.00862	GCF_900502175.1	5749029	76	15	0	0	0
KLPN.1018.00863	GCF_900512365.1	5699999	78	15	1	1	0
KLPN.1018.00864	GCF_900502225.1	5476872	80	15	0	0	0
KLPN.1018.00865	GCF_900508905.1	5773799	82	15	0	0	0
KLPN.1018.00866	GCF_900507525.1	5459816	83	15	1	1	0
KLPN.1018.00867	GCF_900494335.1	5543324	86	15	0	0	0
KLPN.1018.00868	GCF_900512515.1	5302046	87	15	0	0	0
KLPN.1018.00869	GCF_900517195.1	5594316	89	15	0	0	0
KLPN.1018.00870	GCF_900503065.1	5510121	98	15	0	0	0
KLPN.1018.00871	GCF_900172185.1	5158639	99	15	0	0	0
KLPN.1018.00872	GCF_900504775.1	5406784	100	15	1	1	0
KLPN.1018.00873	GCF_900493785.1	5640662	103	15	1	1	0
KLPN.1018.00874	GCF_002991725.1	5699399	106	15	1	0	0
KLPN.1018.00875	GCF_003037655.1	5549318	112	15	1	0	0
KLPN.1018.00876	GCF_900515055.1	5600418	113	15	0	0	0
KLPN.1018.00877	GCF_900172905.1	5390750	124	15	1	1	0
KLPN.1018.00878	GCF_900508225.1	5420632	126	15	0	0	0
KLPN.1018.00879	GCF_900517445.1	5483499	128	15	0	0	1
KLPN.1018.00880	GCF_900172885.1	5383004	135	15	0	0	1
KLPN.1018.00881	GCF_900513145.1	5244222	142	15	0	0	0
KLPN.1018.00882	GCF_002258005.1	5342425	144	15	0	0	0
KLPN.1018.00883	GCF_900503005.1	5542413	148	15	0	1	0
KLPN.1018.00884	GCF_900172975.1	5374028	157	15	0	1	0
KLPN.1018.00885	GCF_900503215.1	5541726	160	15	1	0	0
KLPN.1018.00886	GCF_900507285.1	5538659	194	15	1	1	0
KLPN.1018.00887	GCF_900517585.1	5630869	250	15	1	2	0
KLPN.1018.00888	GCF_900508725.1	5811165	295	15	0	1	1
KLPN.1018.00889	GCF_900505835.1	5368280	329	15	0	0	0
KLPN.1018.00890	GCF_900504245.1	5289636	346	15	0	0	0
KLPN.1018.00891	GCF_900505705.1	5426785	369	15	0	0	0
KLPN.1018.00892	GCF_900503955.1	5536251	463	15	0	0	0
KLPN.1018.00893	GCF_001033845.1	5638165	26	16	0	0	0
KLPN.1018.00894	GCF_001031995.1	5505811	27	16	1	0	0
KLPN.1018.00895	GCF_000493075.1	5533807	29	16	0	0	0
KLPN.1018.00896	GCF_001031475.1	5617546	29	16	1	1	0
KLPN.1018.00897	GCF_001034055.1	5798922	30	16	2	0	0
KLPN.1018.00898	GCF_000693035.1	5499558	31	16	0	0	0
KLPN.1018.00899	GCF_001031745.1	5782084	33	16	1	0	0
KLPN.1018.00900	GCF_001033135.1	5546147	33	16	1	1	0
KLPN.1018.00901	GCF_003403275.1	5199422	33	16	0	0	0
KLPN.1018.00902	GCF_000492195.1	5671655	34	16	0	1	0
KLPN.1018.00903	GCF_001032685.1	5558472	34	16	1	0	0
KLPN.1018.00904	GCF_000694015.1	5840385	35	16	2	0	0
KLPN.1018.00905	GCF_002187015.1	5197766	36	16	0	0	0
KLPN.1018.00906	GCF_001032605.1	5642234	36	16	1	1	0
KLPN.1018.00907	GCF_000982205.1	5504339	37	16	0	0	0
KLPN.1018.00908	GCF_900492865.1	5456292	39	16	1	1	0
KLPN.1018.00909	GCF_000566825.1	5736012	40	16	0	0	0
KLPN.1018.00910	GCF_900093025.1	5388455	40	16	0	0	0
KLPN.1018.00911	GCF_001185865.1	5839112	41	16	2	2	0
KLPN.1018.00912	GCF_002854175.1	5398016	43	16	1	1	0
KLPN.1018.00913	GCF_900173075.1	5603473	43	16	1	1	0
KLPN.1018.00914	GCF_001701615.1	5504459	45	16	0	1	0
KLPN.1018.00915	GCF_900517775.1	5487471	46	16	0	0	0
KLPN.1018.00916	GCF_000822145.1	5430126	46	16	0	1	0
KLPN.1018.00917	GCF_900514155.1	5305690	47	16	0	0	0
KLPN.1018.00918	GCF_001645745.1	6196584	47	16	0	0	0
KLPN.1018.00919	GCF_900515115.1	5603340	49	16	0	0	0
KLPN.1018.00920	GCF_900503675.1	5507534	50	16	0	0	0
KLPN.1018.00921	GCF_900501415.1	5355381	51	16	0	0	0
KLPN.1018.00922	GCF_900502055.1	5438276	51	16	0	0	0
KLPN.1018.00923	GCF_001466765.1	5362779	51	16	0	1	0
KLPN.1018.00924	GCF_900506435.1	5351298	52	16	0	0	0
KLPN.1018.00925	GCF_900506685.1	5416807	52	16	0	0	0
KLPN.1018.00926	GCF_900516705.1	5338859	53	16	0	0	0
KLPN.1018.00927	GCF_900494075.1	5507938	54	16	0	0	0
KLPN.1018.00928	GCF_000300835.1	5401505	54	16	0	2	1
KLPN.1018.00929	GCF_900508285.1	5518309	55	16	0	0	0
KLPN.1018.00930	GCF_900493025.1	5312061	56	16	1	1	0
KLPN.1018.00931	GCF_900506595.1	5331417	56	16	1	1	0
KLPN.1018.00932	GCF_002851135.1	5639589	57	16	0	2	1
KLPN.1018.00933	GCF_900506675.1	5396926	57	16	0	0	0
KLPN.1018.00934	GCF_900493085.1	5506234	57	16	1	1	0
KLPN.1018.00935	GCF_900511825.1	5506623	58	16	0	0	0
KLPN.1018.00936	GCF_900493075.1	5417847	58	16	1	0	0
KLPN.1018.00937	GCF_900494675.1	5400454	58	16	0	0	0
KLPN.1018.00938	GCF_900508155.1	5401497	58	16	0	0	0
KLPN.1018.00939	GCF_900512745.1	5411036	59	16	1	0	0
KLPN.1018.00940	GCF_900501025.1	5366817	60	16	0	0	0
KLPN.1018.00941	GCF_900508915.1	5607003	60	16	0	0	0
KLPN.1018.00942	GCF_900516065.1	5701276	61	16	0	0	0
KLPN.1018.00943	GCF_900093445.1	5429611	61	16	1	0	0
KLPN.1018.00944	GCF_900509075.1	5440974	61	16	0	0	0
KLPN.1018.00945	GCF_900510365.1	5573085	61	16	0	0	0
KLPN.1018.00946	GCF_900515475.1	5437905	62	16	0	0	0
KLPN.1018.00947	GCF_900514535.1	5555168	62	16	0	0	0
KLPN.1018.00948	GCF_002775175.1	5542633	62	16	0	2	1
KLPN.1018.00949	GCF_900508405.1	5534747	63	16	1	0	0
KLPN.1018.00950	GCF_900509025.1	5645437	64	16	0	1	0
KLPN.1018.00951	GCF_900504475.1	5463666	65	16	0	0	0
KLPN.1018.00952	GCF_900503105.1	5235410	66	16	0	0	0
KLPN.1018.00953	GCF_900508635.1	5460809	68	16	1	0	0
KLPN.1018.00954	GCF_003227515.1	5591661	68	16	0	0	0
KLPN.1018.00955	GCF_900504135.1	5657736	68	16	0	1	0
KLPN.1018.00956	GCF_900517575.1	5523222	68	16	1	0	0
KLPN.1018.00957	GCF_003227655.1	5545026	69	16	0	0	0
KLPN.1018.00958	GCF_900493715.1	5648164	69	16	0	0	0
KLPN.1018.00959	GCF_900514835.1	5369104	70	16	0	0	0
KLPN.1018.00960	GCF_900517235.1	5638849	70	16	1	1	0
KLPN.1018.00961	GCF_900494505.1	5602233	70	16	1	0	0
KLPN.1018.00962	GCF_900494525.1	5495245	70	16	0	0	0
KLPN.1018.00963	GCF_900498645.1	5524018	72	16	0	0	0
KLPN.1018.00964	GCF_900511655.1	5860276	72	16	1	1	0
KLPN.1018.00965	GCF_900092925.1	5751542	75	16	0	0	0
KLPN.1018.00966	GCF_002866675.1	5615671	75	16	0	0	0
KLPN.1018.00967	GCF_900501045.1	5336958	76	16	0	0	0
KLPN.1018.00968	GCF_900493095.1	5564807	77	16	1	1	0
KLPN.1018.00969	GCF_900515505.1	5748083	77	16	1	1	0
KLPN.1018.00970	GCF_900514295.1	5473787	78	16	0	0	0
KLPN.1018.00971	GCF_002775395.1	5425975	79	16	1	0	0
KLPN.1018.00972	GCF_900515445.1	5456345	81	16	0	1	0
KLPN.1018.00973	GCF_002775345.1	5440365	83	16	0	0	0
KLPN.1018.00974	GCF_900498635.1	5581334	84	16	0	0	0
KLPN.1018.00975	GCF_900173605.1	5508699	84	16	0	0	0
KLPN.1018.00976	GCF_900514845.1	5434374	85	16	0	0	0
KLPN.1018.00977	GCF_900493355.1	5373706	86	16	0	0	0
KLPN.1018.00978	GCF_900508305.1	5454176	86	16	0	0	0
KLPN.1018.00979	GCF_900506485.1	5302812	88	16	0	0	0
KLPN.1018.00980	GCF_900511135.1	5364462	89	16	1	1	0
KLPN.1018.00981	GCF_900407225.1	5468377	92	16	0	0	0
KLPN.1018.00982	GCF_900501665.1	5765336	95	16	0	2	0
KLPN.1018.00983	GCF_900501815.1	5770104	95	16	0	1	0
KLPN.1018.00984	GCF_900504015.1	5468493	96	16	0	2	1
KLPN.1018.00985	GCF_900504585.1	5632737	96	16	0	0	1
KLPN.1018.00986	GCF_900493235.1	5533964	96	16	1	1	0
KLPN.1018.00987	GCF_900496805.1	5477093	97	16	1	0	0
KLPN.1018.00988	GCF_900515285.1	5344103	100	16	0	0	0
KLPN.1018.00989	GCF_900510445.1	5425011	119	16	0	0	0
KLPN.1018.00990	GCF_900507935.1	5638013	143	16	0	1	1
KLPN.1018.00991	GCF_900514955.1	5364769	182	16	0	0	0
KLPN.1018.00992	GCF_003583115.1	5575837	184	16	1	1	0
KLPN.1018.00993	GCF_900515275.1	5809532	193	16	0	1	0
KLPN.1018.00994	GCF_900515595.1	5613390	193	16	0	0	0
KLPN.1018.00995	GCF_900516405.1	5820470	397	16	1	1	0
KLPN.1018.00996	GCF_000694515.1	5378089	26	17	0	0	0
KLPN.1018.00997	GCF_001033975.1	5468171	28	17	1	0	0
KLPN.1018.00998	GCF_002855255.1	5556699	32	17	0	0	1
KLPN.1018.00999	GCF_000300675.1	5729369	32	17	0	0	0
KLPN.1018.01000	GCF_000694235.1	5392539	35	17	1	1	0
KLPN.1018.01001	GCF_002187915.1	5195187	37	17	0	0	0
KLPN.1018.01002	GCF_900173275.1	5264538	39	17	0	0	0
KLPN.1018.01003	GCF_000693815.1	5684653	40	17	1	0	0
KLPN.1018.01004	GCF_900492975.1	5384066	42	17	1	0	0
KLPN.1018.01005	GCF_000693575.1	5864502	43	17	1	1	0
KLPN.1018.01006	GCF_002108315.1	5372623	43	17	0	2	1
KLPN.1018.01007	GCF_900509985.1	5249755	44	17	0	0	0
KLPN.1018.01008	GCF_000567265.1	5742090	45	17	1	0	0
KLPN.1018.01009	GCF_900093035.1	5599267	45	17	0	0	0
KLPN.1018.01010	GCF_900502005.1	5244082	45	17	0	0	0
KLPN.1018.01011	GCF_900515865.1	5531762	45	17	0	0	0
KLPN.1018.01012	GCF_002181915.1	5393352	46	17	0	1	0
KLPN.1018.01013	GCF_900505785.1	5514632	47	17	0	0	0
KLPN.1018.01014	GCF_001032125.1	5666553	47	17	0	0	0
KLPN.1018.01015	GCF_900506965.1	5463380	48	17	0	0	0
KLPN.1018.01016	GCF_900493185.1	5252448	48	17	1	0	0
KLPN.1018.01017	GCF_900503415.1	5207304	50	17	1	1	0
KLPN.1018.01018	GCF_002872205.1	5270714	50	17	0	0	0
KLPN.1018.01019	GCF_001939855.1	5735416	52	17	0	0	0
KLPN.1018.01020	GCF_900512385.1	5439310	52	17	1	1	0
KLPN.1018.01021	GCF_900513995.1	5189900	53	17	0	0	0
KLPN.1018.01022	GCF_900510245.1	5441315	53	17	0	0	0
KLPN.1018.01023	GCF_900492815.1	5492711	54	17	1	1	0
KLPN.1018.01024	GCF_900507675.1	5489784	54	17	0	0	0
KLPN.1018.01025	GCF_900511035.1	5515281	54	17	0	1	1
KLPN.1018.01026	GCF_900511125.1	5504919	54	17	1	0	0
KLPN.1018.01027	GCF_900513175.1	5391844	55	17	0	0	0
KLPN.1018.01028	GCF_900493115.1	5361875	56	17	0	0	0
KLPN.1018.01029	GCF_900513915.1	5563960	56	17	0	1	1
KLPN.1018.01030	GCF_900512545.1	5454602	56	17	1	0	0
KLPN.1018.01031	GCF_900507845.1	5201557	57	17	1	0	0
KLPN.1018.01032	GCF_900507785.1	5334518	57	17	0	0	0
KLPN.1018.01033	GCF_900508005.1	5286404	57	17	0	0	0
KLPN.1018.01034	GCF_900508165.1	5431762	57	17	0	1	0
KLPN.1018.01035	GCF_900510655.1	5487834	58	17	1	1	0
KLPN.1018.01036	GCF_900092945.1	5739134	58	17	0	0	0
KLPN.1018.01037	GCF_002257775.1	5502322	58	17	1	0	0
KLPN.1018.01038	GCF_002853135.1	5217617	59	17	0	1	1
KLPN.1018.01039	GCF_002853355.1	5371795	59	17	0	0	0
KLPN.1018.01040	GCF_002269805.1	5460221	59	17	0	0	0
KLPN.1018.01041	GCF_900508345.1	5529610	59	17	0	2	1
KLPN.1018.01042	GCF_900510075.1	5498115	60	17	1	0	0
KLPN.1018.01043	GCF_900517595.1	5461207	60	17	0	0	0
KLPN.1018.01044	GCF_900172565.1	5574000	60	17	0	0	0
KLPN.1018.01045	GCF_002866615.1	5499755	61	17	0	0	0
KLPN.1018.01046	GCF_900501335.1	5499669	61	17	0	0	1
KLPN.1018.01047	GCF_900493965.1	5679184	62	17	0	0	0
KLPN.1018.01048	GCF_001460475.1	5401315	62	17	1	1	0
KLPN.1018.01049	GCF_900502205.1	5554033	63	17	0	0	0
KLPN.1018.01050	GCF_900510045.1	5391189	64	17	0	0	0
KLPN.1018.01051	GCF_900508845.1	5345186	64	17	1	1	0
KLPN.1018.01052	GCF_900513715.1	5352042	64	17	1	1	0
KLPN.1018.01053	GCF_001463445.1	5292577	64	17	1	0	0
KLPN.1018.01054	GCF_900514105.1	5387403	65	17	0	0	0
KLPN.1018.01055	GCF_900510725.1	5242153	65	17	0	0	0
KLPN.1018.01056	GCF_900504435.1	5373670	65	17	1	0	0
KLPN.1018.01057	GCF_900507895.1	5451347	65	17	1	0	0
KLPN.1018.01058	GCF_900511085.1	5692385	66	17	1	0	0
KLPN.1018.01059	GCF_900494445.1	5575051	66	17	0	1	0
KLPN.1018.01060	GCF_900510395.1	5501236	67	17	0	0	0
KLPN.1018.01061	GCF_900506625.1	5483776	67	17	1	0	0
KLPN.1018.01062	GCF_900501505.1	5645530	68	17	0	0	0
KLPN.1018.01063	GCF_900517255.1	5783544	70	17	1	0	0
KLPN.1018.01064	GCF_900515965.1	5321235	71	17	0	0	0
KLPN.1018.01065	GCF_900501015.1	5655379	72	17	0	0	0
KLPN.1018.01066	GCF_900506525.1	5549962	73	17	1	1	0
KLPN.1018.01067	GCF_900493755.1	5391983	73	17	0	0	0
KLPN.1018.01068	GCF_900500975.1	5393962	73	17	0	0	0
KLPN.1018.01069	GCF_900507685.1	5521568	74	17	1	0	0
KLPN.1018.01070	GCF_900514255.1	5594244	74	17	0	0	0
KLPN.1018.01071	GCF_900496895.1	5525123	74	17	0	0	0
KLPN.1018.01072	GCF_900514115.1	5544823	74	17	0	1	1
KLPN.1018.01073	GCF_002852325.1	5310768	74	17	0	0	0
KLPN.1018.01074	GCF_900502825.1	5332788	75	17	1	0	0
KLPN.1018.01075	GCF_900493635.1	5563510	75	17	0	0	0
KLPN.1018.01076	GCF_900516105.1	5774524	76	17	0	0	0
KLPN.1018.01077	GCF_900508295.1	5479399	76	17	1	0	0
KLPN.1018.01078	GCF_900515715.1	5475937	76	17	1	0	0
KLPN.1018.01079	GCF_900503135.1	5598882	77	17	0	0	0
KLPN.1018.01080	GCF_900501835.1	5616414	78	17	1	0	0
KLPN.1018.01081	GCF_900511645.1	5444798	78	17	1	2	0
KLPN.1018.01082	GCF_002775555.1	5388988	79	17	0	0	0
KLPN.1018.01083	GCF_900498945.1	5351401	80	17	0	0	0
KLPN.1018.01084	GCF_900493175.1	5743700	81	17	1	1	0
KLPN.1018.01085	GCF_900507555.1	5432228	82	17	1	0	0
KLPN.1018.01086	GCF_002853515.1	5497755	84	17	1	0	0
KLPN.1018.01087	GCF_900517485.1	5629556	85	17	0	0	0
KLPN.1018.01088	GCF_002257785.1	5413937	86	17	1	0	0
KLPN.1018.01089	GCF_900514625.1	5456082	87	17	0	0	0
KLPN.1018.01090	GCF_900501225.1	5381273	88	17	0	0	0
KLPN.1018.01091	GCF_900507375.1	5287266	88	17	1	0	0
KLPN.1018.01092	GCF_900516115.1	5417800	89	17	1	0	0
KLPN.1018.01093	GCF_900501935.1	5552506	96	17	0	0	0
KLPN.1018.01094	GCF_900494325.1	5589303	96	17	1	1	0
KLPN.1018.01095	GCF_900513975.1	5834959	97	17	0	1	1
KLPN.1018.01096	GCF_002257875.1	5527822	101	17	1	0	0
KLPN.1018.01097	GCF_900493865.1	5528260	114	17	0	0	0
KLPN.1018.01098	GCF_900093005.1	6050763	114	17	1	0	0
KLPN.1018.01099	GCF_900503645.1	5675016	119	17	0	1	0
KLPN.1018.01100	GCF_003583195.1	5704522	122	17	1	1	0
KLPN.1018.01101	GCF_002258085.1	5569815	128	17	1	0	0
KLPN.1018.01102	GCF_900503715.1	5620375	129	17	0	1	0
KLPN.1018.01103	GCF_900506405.1	5481009	135	17	0	0	1
KLPN.1018.01104	GCF_900517755.1	5523336	135	17	1	2	0
KLPN.1018.01105	GCF_900092685.1	5834874	149	17	0	3	1
KLPN.1018.01106	GCF_900504685.1	5654744	150	17	0	2	1
KLPN.1018.01107	GCF_900507925.1	5605015	168	17	0	1	1
KLPN.1018.01108	GCF_900173415.1	5568959	178	17	0	1	0
KLPN.1018.01109	GCF_900505985.1	5668056	181	17	0	1	0
KLPN.1018.01110	GCF_900504895.1	5627856	239	17	1	1	0
KLPN.1018.01111	GCF_900507235.1	5722356	245	17	0	1	0
KLPN.1018.01112	GCF_900500955.1	5855807	246	17	1	1	0
KLPN.1018.01113	GCF_900502405.1	5636871	264	17	0	0	0
KLPN.1018.01114	GCF_900514345.1	5727690	265	17	0	0	0
KLPN.1018.01115	GCF_900517515.1	5659066	281	17	1	1	0
KLPN.1018.01116	GCF_003171755.1	5320309	477	17	0	0	0
KLPN.1018.01117	GCF_900501205.1	5551356	883	17	0	0	0
KLPN.1018.01118	GCF_900084945.1	5269054	31	18	0	0	0
KLPN.1018.01119	GCF_000300955.1	5788283	34	18	2	0	0
KLPN.1018.01120	GCF_003196515.1	5233772	38	18	0	0	0
KLPN.1018.01121	GCF_001031105.1	5724547	38	18	1	2	0
KLPN.1018.01122	GCF_000982085.1	5259126	42	18	1	3	0
KLPN.1018.01123	GCF_900508925.1	5228448	43	18	0	0	0
KLPN.1018.01124	GCF_900084125.1	5448112	44	18	1	1	0
KLPN.1018.01125	GCF_900084145.1	5350671	44	18	1	1	0
KLPN.1018.01126	GCF_003196795.1	5457878	45	18	0	0	0
KLPN.1018.01127	GCF_900511755.1	5524816	48	18	0	0	0
KLPN.1018.01128	GCF_900492745.1	5722986	49	18	0	0	0
KLPN.1018.01129	GCF_900085155.1	5456922	49	18	1	0	0
KLPN.1018.01130	GCF_900493315.1	5540421	50	18	0	0	0
KLPN.1018.01131	GCF_900503435.1	5255809	50	18	1	0	0
KLPN.1018.01132	GCF_001693715.1	5389610	50	18	2	2	0
KLPN.1018.01133	GCF_002261585.1	5482902	51	18	0	0	0
KLPN.1018.01134	GCF_002181945.1	5470050	51	18	0	1	0
KLPN.1018.01135	GCF_900508565.1	5546195	51	18	0	0	0
KLPN.1018.01136	GCF_000474635.1	5650292	52	18	3	1	0
KLPN.1018.01137	GCF_900515435.1	5528814	52	18	0	0	0
KLPN.1018.01138	GCF_900512995.1	5343771	53	18	0	0	0
KLPN.1018.01139	GCF_900501465.1	5342679	53	18	0	0	0
KLPN.1018.01140	GCF_900500845.1	5242656	53	18	0	0	0
KLPN.1018.01141	GCF_900517185.1	5563212	54	18	0	0	0
KLPN.1018.01142	GCF_900512345.1	5716972	54	18	0	0	0
KLPN.1018.01143	GCF_001720645.1	5427926	54	18	0	0	0
KLPN.1018.01144	GCF_900510895.1	5501477	55	18	1	1	0
KLPN.1018.01145	GCF_002850805.1	5618316	56	18	0	2	0
KLPN.1018.01146	GCF_900502555.1	5242705	57	18	0	0	0
KLPN.1018.01147	GCF_900503425.1	5544051	57	18	1	2	0
KLPN.1018.01148	GCF_900510995.1	5524590	57	18	0	1	1
KLPN.1018.01149	GCF_900502145.1	5373321	57	18	0	0	0
KLPN.1018.01150	GCF_900511095.1	5456464	57	18	1	0	0
KLPN.1018.01151	GCF_900507255.1	5367114	58	18	1	0	0
KLPN.1018.01152	GCF_000788005.1	5575209	58	18	1	1	0
KLPN.1018.01153	GCF_900502505.1	5383735	59	18	0	0	0
KLPN.1018.01154	GCF_900516505.1	5536886	60	18	0	0	0
KLPN.1018.01155	GCF_900504405.1	5396789	60	18	0	0	0
KLPN.1018.01156	GCF_900493345.1	5541253	60	18	1	1	0
KLPN.1018.01157	GCF_900512765.1	5654667	60	18	1	0	0
KLPN.1018.01158	GCF_900514325.1	5434282	61	18	0	0	0
KLPN.1018.01159	GCF_900513525.1	5530064	61	18	0	0	0
KLPN.1018.01160	GCF_900514335.1	5413032	62	18	1	0	0
KLPN.1018.01161	GCF_900494085.1	5569614	62	18	0	0	0
KLPN.1018.01162	GCF_900517225.1	5692092	63	18	1	1	0
KLPN.1018.01163	GCF_900508245.1	5507754	63	18	0	0	0
KLPN.1018.01164	GCF_900515705.1	5756432	63	18	0	1	1
KLPN.1018.01165	GCF_900492775.1	5647798	63	18	0	0	0
KLPN.1018.01166	GCF_900517825.1	5407603	63	18	1	1	0
KLPN.1018.01167	GCF_900512735.1	5455212	64	18	0	0	0
KLPN.1018.01168	GCF_900511665.1	5789296	65	18	1	0	0
KLPN.1018.01169	GCF_003471715.1	5346358	66	18	0	0	0
KLPN.1018.01170	GCF_900509065.1	5434569	66	18	0	0	1
KLPN.1018.01171	GCF_900511245.1	5541747	66	18	0	1	0
KLPN.1018.01172	GCF_900502435.1	5351994	66	18	0	0	0
KLPN.1018.01173	GCF_900503385.1	5708784	66	18	1	0	0
KLPN.1018.01174	GCF_900512595.1	5630723	68	18	1	1	0
KLPN.1018.01175	GCF_900512695.1	5510292	68	18	0	0	0
KLPN.1018.01176	GCF_900512265.1	5466458	69	18	0	0	0
KLPN.1018.01177	GCF_900493005.1	5541911	69	18	1	0	0
KLPN.1018.01178	GCF_900513645.1	5494777	70	18	0	0	0
KLPN.1018.01179	GCF_900513895.1	5841237	70	18	0	2	1
KLPN.1018.01180	GCF_900510405.1	5563918	70	18	0	0	0
KLPN.1018.01181	GCF_900498735.1	5372844	70	18	0	0	0
KLPN.1018.01182	GCF_900508255.1	5501503	72	18	1	0	0
KLPN.1018.01183	GCF_900507065.1	5790270	72	18	1	1	0
KLPN.1018.01184	GCF_003195015.1	5423933	72	18	0	0	0
KLPN.1018.01185	GCF_900511705.1	5607105	72	18	0	2	0
KLPN.1018.01186	GCF_900494255.1	5554645	73	18	1	0	0
KLPN.1018.01187	GCF_001630805.1	5604834	73	18	0	0	0
KLPN.1018.01188	GCF_900502355.1	5262793	73	18	0	0	0
KLPN.1018.01189	GCF_003227305.1	5630459	75	18	0	0	0
KLPN.1018.01190	GCF_900506065.1	5508613	75	18	0	2	0
KLPN.1018.01191	GCF_900517525.1	5528292	75	18	1	1	0
KLPN.1018.01192	GCF_900493135.1	5704772	75	18	1	0	0
KLPN.1018.01193	GCF_900514015.1	5358822	76	18	1	1	0
KLPN.1018.01194	GCF_900508605.1	5447479	76	18	0	0	0
KLPN.1018.01195	GCF_900493685.1	5673976	77	18	0	0	0
KLPN.1018.01196	GCF_900510745.1	5613035	77	18	0	0	0
KLPN.1018.01197	GCF_900508275.1	5437263	77	18	0	1	1
KLPN.1018.01198	GCF_900086415.1	5414315	80	18	1	1	0
KLPN.1018.01199	GCF_003227135.1	5568358	82	18	0	0	0
KLPN.1018.01200	GCF_900502965.1	5469807	82	18	1	1	0
KLPN.1018.01201	GCF_900502595.1	5373033	83	18	1	0	0
KLPN.1018.01202	GCF_900514735.1	5671068	84	18	0	0	0
KLPN.1018.01203	GCF_002775585.1	5653883	86	18	1	0	0
KLPN.1018.01204	GCF_900494095.1	5589012	87	18	1	2	0
KLPN.1018.01205	GCF_900511945.1	5516165	88	18	1	1	0
KLPN.1018.01206	GCF_900507765.1	5409486	91	18	0	0	0
KLPN.1018.01207	GCF_900494045.1	5523437	91	18	0	0	0
KLPN.1018.01208	GCF_900498625.1	5271447	92	18	0	0	0
KLPN.1018.01209	GCF_900173345.1	5573350	94	18	0	0	0
KLPN.1018.01210	GCF_900513465.1	5645443	95	18	1	1	0
KLPN.1018.01211	GCF_900503235.1	5202213	95	18	0	0	0
KLPN.1018.01212	GCF_900500685.1	5488605	98	18	0	0	0
KLPN.1018.01213	GCF_002934745.1	5481050	98	18	0	0	0
KLPN.1018.01214	GCF_003261795.1	5513984	99	18	0	1	1
KLPN.1018.01215	GCF_900502045.1	5607856	100	18	0	1	0
KLPN.1018.01216	GCF_900503995.1	5480293	104	18	0	2	1
KLPN.1018.01217	GCF_900494735.1	5484794	104	18	1	1	0
KLPN.1018.01218	GCF_900514055.1	5446591	106	18	1	0	0
KLPN.1018.01219	GCF_900501985.1	5782409	109	18	0	2	0
KLPN.1018.01220	GCF_900517175.1	5449293	109	18	1	0	0
KLPN.1018.01221	GCF_002775575.1	5507301	110	18	0	0	0
KLPN.1018.01222	GCF_900517785.1	5440623	113	18	1	1	0
KLPN.1018.01223	GCF_900500995.1	5531104	121	18	1	1	0
KLPN.1018.01224	GCF_900504485.1	5513454	124	18	0	0	0
KLPN.1018.01225	GCF_900407065.1	5545748	129	18	0	0	0
KLPN.1018.01226	GCF_900507955.1	5484203	148	18	0	2	0
KLPN.1018.01227	GCF_900512155.1	5631983	148	18	1	1	0
KLPN.1018.01228	GCF_900172735.1	5572873	162	18	0	0	0
KLPN.1018.01229	GCF_900172785.1	5571694	163	18	0	1	0
KLPN.1018.01230	GCF_900505215.1	5749224	170	18	0	1	0
KLPN.1018.01231	GCF_900502395.1	5752397	181	18	0	1	1
KLPN.1018.01232	GCF_900504225.1	5668846	182	18	0	0	1
KLPN.1018.01233	GCF_900514355.1	5701219	193	18	0	0	0
KLPN.1018.01234	GCF_900172545.1	5548609	227	18	0	0	0
KLPN.1018.01235	GCF_900508325.1	5585769	287	18	1	0	0
KLPN.1018.01236	GCF_900505695.1	5627065	309	18	0	0	0
KLPN.1018.01237	GCF_900514385.1	5622584	400	18	0	0	1
KLPN.1018.01238	GCF_900507855.1	5771477	412	18	0	1	1
KLPN.1018.01239	GCF_003173515.1	5452171	848	18	0	0	0
KLPN.1018.01240	GCF_002870925.1	5814268	35	19	0	0	0
KLPN.1018.01241	GCF_002870945.1	5537320	38	19	0	0	0
KLPN.1018.01242	GCF_002152685.1	5617358	39	19	0	0	0
KLPN.1018.01243	GCF_001031095.1	5864914	40	19	3	0	0
KLPN.1018.01244	GCF_900173295.1	5308077	40	19	0	0	0
KLPN.1018.01245	GCF_001033755.1	5891261	41	19	2	1	0
KLPN.1018.01246	GCF_000787995.1	5570710	43	19	1	0	0
KLPN.1018.01247	GCF_900508515.1	5417736	44	19	0	0	0
KLPN.1018.01248	GCF_900517245.1	5330704	44	19	1	0	0
KLPN.1018.01249	GCF_001033965.1	5634537	45	19	1	1	0
KLPN.1018.01250	GCF_000694455.1	5474225	48	19	0	0	0
KLPN.1018.01251	GCF_900507145.1	5363588	48	19	0	0	0
KLPN.1018.01252	GCF_000694615.1	5690044	49	19	1	1	0
KLPN.1018.01253	GCF_002188175.1	5545208	51	19	1	1	0
KLPN.1018.01254	GCF_900085545.1	5431835	51	19	0	0	0
KLPN.1018.01255	GCF_002087495.1	5380813	52	19	0	0	0
KLPN.1018.01256	GCF_900506755.1	5467928	53	19	0	0	0
KLPN.1018.01257	GCF_900512325.1	5239669	54	19	0	0	0
KLPN.1018.01258	GCF_900515195.1	5470411	55	19	0	0	0
KLPN.1018.01259	GCF_900515685.1	5502235	55	19	1	0	0
KLPN.1018.01260	GCF_002853385.1	5435332	56	19	0	0	0
KLPN.1018.01261	GCF_900512405.1	5173955	56	19	0	0	0
KLPN.1018.01262	GCF_900510665.1	5517061	57	19	0	0	0
KLPN.1018.01263	GCF_900514395.1	5404307	59	19	0	0	0
KLPN.1018.01264	GCF_900494125.1	5681921	59	19	0	0	0
KLPN.1018.01265	GCF_002152355.1	5500417	59	19	1	0	0
KLPN.1018.01266	GCF_900505025.1	5306877	60	19	0	2	0
KLPN.1018.01267	GCF_002855015.1	5363136	62	19	0	0	0
KLPN.1018.01268	GCF_002264435.1	5822605	63	19	0	0	1
KLPN.1018.01269	GCF_900493795.1	5480560	63	19	0	0	0
KLPN.1018.01270	GCF_002261815.1	5508450	64	19	0	0	0
KLPN.1018.01271	GCF_900513215.1	5788437	64	19	0	1	1
KLPN.1018.01272	GCF_900511525.1	5497563	64	19	0	1	0
KLPN.1018.01273	GCF_900503875.1	5588000	64	19	1	0	0
KLPN.1018.01274	GCF_001038365.1	5244295	64	19	0	0	0
KLPN.1018.01275	GCF_900084895.1	5321568	65	19	0	1	0
KLPN.1018.01276	GCF_900513505.1	5577952	66	19	1	1	0
KLPN.1018.01277	GCF_900494615.1	5628918	66	19	1	2	0
KLPN.1018.01278	GCF_900508135.1	5572945	67	19	0	0	0
KLPN.1018.01279	GCF_900507125.1	5637980	67	19	1	1	0
KLPN.1018.01280	GCF_900494575.1	5463759	67	19	0	0	0
KLPN.1018.01281	GCF_003037795.1	5432341	68	19	1	0	0
KLPN.1018.01282	GCF_900503285.1	5451136	68	19	1	0	0
KLPN.1018.01283	GCF_900503155.1	5573097	69	19	1	1	0
KLPN.1018.01284	GCF_002807065.1	5496779	69	19	0	0	0
KLPN.1018.01285	GCF_900505245.1	5507123	69	19	1	2	0
KLPN.1018.01286	GCF_002239965.1	5508309	71	19	0	0	0
KLPN.1018.01287	GCF_900501145.1	5269351	72	19	1	1	0
KLPN.1018.01288	GCF_900502585.1	5700029	72	19	1	2	0
KLPN.1018.01289	GCF_900517285.1	5423415	73	19	0	0	0
KLPN.1018.01290	GCF_900506695.1	5615826	74	19	0	0	0
KLPN.1018.01291	GCF_900506715.1	5761989	76	19	1	1	0
KLPN.1018.01292	GCF_900501635.1	5544326	76	19	0	0	0
KLPN.1018.01293	GCF_900506855.1	5833540	77	19	1	1	0
KLPN.1018.01294	GCF_900507865.1	5460304	77	19	1	1	0
KLPN.1018.01295	GCF_900513415.1	5514479	77	19	0	0	0
KLPN.1018.01296	GCF_900517425.1	5524294	78	19	0	0	0
KLPN.1018.01297	GCF_900508835.1	5424082	80	19	1	1	0
KLPN.1018.01298	GCF_900503405.1	5621263	81	19	1	2	0
KLPN.1018.01299	GCF_900505625.1	5573085	82	19	0	1	0
KLPN.1018.01300	GCF_900492955.1	5510912	83	19	1	1	0
KLPN.1018.01301	GCF_002866605.1	5700934	83	19	0	1	1
KLPN.1018.01302	GCF_900492855.1	5734918	84	19	0	0	0
KLPN.1018.01303	GCF_900501975.1	5665005	84	19	0	0	0
KLPN.1018.01304	GCF_900494745.1	5576101	84	19	1	3	0
KLPN.1018.01305	GCF_900514665.1	5538361	84	19	1	1	0
KLPN.1018.01306	GCF_900511815.1	5643246	85	19	1	0	0
KLPN.1018.01307	GCF_900516875.1	5647320	86	19	0	1	0
KLPN.1018.01308	GCF_002854935.1	5580339	87	19	1	1	0
KLPN.1018.01309	GCF_900498875.1	5245044	88	19	0	0	0
KLPN.1018.01310	GCF_900514205.1	5485268	88	19	0	1	0
KLPN.1018.01311	GCF_900513665.1	5587455	88	19	1	1	0
KLPN.1018.01312	GCF_900507215.1	5645794	89	19	0	1	0
KLPN.1018.01313	GCF_900517065.1	5590489	89	19	0	1	0
KLPN.1018.01314	GCF_900494185.1	5621382	90	19	0	0	0
KLPN.1018.01315	GCF_900513285.1	5459803	91	19	1	1	0
KLPN.1018.01316	GCF_900515105.1	5467666	93	19	0	0	0
KLPN.1018.01317	GCF_900513965.1	5777759	95	19	0	1	1
KLPN.1018.01318	GCF_900507875.1	5581164	95	19	1	1	0
KLPN.1018.01319	GCF_900093465.1	5524622	96	19	0	0	0
KLPN.1018.01320	GCF_900493875.1	5670358	97	19	1	1	0
KLPN.1018.01321	GCF_900504965.1	5615340	97	19	0	2	0
KLPN.1018.01322	GCF_900494315.1	5525945	97	19	1	1	0
KLPN.1018.01323	GCF_900517695.1	5699963	99	19	1	1	0
KLPN.1018.01324	GCF_002261855.1	5530662	101	19	0	0	0
KLPN.1018.01325	GCF_900493055.1	5674952	102	19	0	1	0
KLPN.1018.01326	GCF_900515525.1	5475347	103	19	0	0	0
KLPN.1018.01327	GCF_900516375.1	5556268	105	19	0	0	0
KLPN.1018.01328	GCF_002775235.1	5703699	105	19	1	1	0
KLPN.1018.01329	GCF_900407155.1	5371581	107	19	1	1	0
KLPN.1018.01330	GCF_002775405.1	5546348	108	19	0	3	1
KLPN.1018.01331	GCF_003226945.1	5586199	109	19	1	1	0
KLPN.1018.01332	GCF_900511065.1	5682714	114	19	0	1	0
KLPN.1018.01333	GCF_900517315.1	5437520	119	19	0	1	0
KLPN.1018.01334	GCF_900501725.1	5665233	127	19	0	2	1
KLPN.1018.01335	GCF_002775255.1	5725829	130	19	0	0	0
KLPN.1018.01336	GCF_002164725.1	5442588	131	19	1	1	0
KLPN.1018.01337	GCF_900407135.1	5569948	145	19	1	0	0
KLPN.1018.01338	GCF_900516225.1	5639638	147	19	1	0	0
KLPN.1018.01339	GCF_900407215.1	5317118	147	19	0	2	1
KLPN.1018.01340	GCF_900515135.1	5628748	175	19	0	1	0
KLPN.1018.01341	GCF_900506255.1	5424924	180	19	0	0	0
KLPN.1018.01342	GCF_900516215.1	5451727	184	19	1	0	0
KLPN.1018.01343	GCF_900173375.1	5537492	238	19	0	1	0
KLPN.1018.01344	GCF_900504265.1	5504703	240	19	0	0	0
KLPN.1018.01345	GCF_900503275.1	5698472	245	19	0	0	1
KLPN.1018.01346	GCF_900494755.1	5657354	276	19	1	0	0
KLPN.1018.01347	GCF_900494195.1	5662823	294	19	1	0	0
KLPN.1018.01348	GCF_900513125.1	5605258	317	19	0	0	0
KLPN.1018.01349	GCF_900516485.1	5569794	397	19	1	0	0
KLPN.1018.01350	GCF_900509045.1	5942248	525	19	0	1	0
KLPN.1018.01351	GCF_900507415.1	5636382	525	19	0	1	0
KLPN.1018.01352	GCF_000492755.1	5419756	34	20	0	0	0
KLPN.1018.01353	GCF_001033895.1	5579189	35	20	0	0	0
KLPN.1018.01354	GCF_000493155.1	5504001	35	20	0	0	0
KLPN.1018.01355	GCF_002851575.1	5394189	41	20	0	0	0
KLPN.1018.01356	GCF_001032075.1	5630734	41	20	0	1	0
KLPN.1018.01357	GCF_003346645.1	5357509	45	20	1	0	0
KLPN.1018.01358	GCF_900492925.1	5611914	46	20	0	0	0
KLPN.1018.01359	GCF_003475175.1	5432300	50	20	0	0	0
KLPN.1018.01360	GCF_900493665.1	5391549	51	20	0	0	0
KLPN.1018.01361	GCF_001441285.1	5675784	53	20	1	0	0
KLPN.1018.01362	GCF_900084265.1	5442182	53	20	1	1	0
KLPN.1018.01363	GCF_003437295.1	5407043	54	20	0	0	0
KLPN.1018.01364	GCF_002257795.1	5369242	55	20	0	0	0
KLPN.1018.01365	GCF_900511215.1	5322946	55	20	0	0	0
KLPN.1018.01366	GCF_900084525.1	5437124	55	20	1	1	0
KLPN.1018.01367	GCF_002186855.1	5464719	55	20	1	0	0
KLPN.1018.01368	GCF_002854915.1	5480979	56	20	1	1	0
KLPN.1018.01369	GCF_900493735.1	5609445	56	20	0	0	0
KLPN.1018.01370	GCF_002186835.1	5287677	56	20	1	0	0
KLPN.1018.01371	GCF_900174095.1	5625787	57	20	0	0	0
KLPN.1018.01372	GCF_900511045.1	5582466	58	20	1	1	0
KLPN.1018.01373	GCF_002851435.1	5629532	59	20	0	2	1
KLPN.1018.01374	GCF_900506705.1	5481968	60	20	0	1	0
KLPN.1018.01375	GCF_900510475.1	5409426	60	20	1	0	0
KLPN.1018.01376	GCF_900515825.1	5431306	61	20	1	1	0
KLPN.1018.01377	GCF_900493405.1	5447712	62	20	1	1	0
KLPN.1018.01378	GCF_900511305.1	5414553	62	20	0	2	1
KLPN.1018.01379	GCF_900515335.1	5577451	62	20	0	0	0
KLPN.1018.01380	GCF_002249125.1	5537309	62	20	1	2	0
KLPN.1018.01381	GCF_900517685.1	5660633	63	20	0	0	0
KLPN.1018.01382	GCF_900503865.1	5517056	64	20	0	0	0
KLPN.1018.01383	GCF_002854715.1	5624192	64	20	1	1	0
KLPN.1018.01384	GCF_900513055.1	5512070	65	20	1	0	0
KLPN.1018.01385	GCF_900508475.1	5566255	65	20	1	0	0
KLPN.1018.01386	GCF_900085405.1	5500708	66	20	0	3	1
KLPN.1018.01387	GCF_900511015.1	5478195	66	20	1	1	0
KLPN.1018.01388	GCF_900517335.1	5513573	66	20	0	0	0
KLPN.1018.01389	GCF_900501355.1	5549792	66	20	0	0	0
KLPN.1018.01390	GCF_900517635.1	5300391	66	20	0	0	0
KLPN.1018.01391	GCF_900517815.1	5451666	67	20	1	1	0
KLPN.1018.01392	GCF_900494535.1	5484767	67	20	1	0	0
KLPN.1018.01393	GCF_002751475.1	5377775	67	20	1	1	0
KLPN.1018.01394	GCF_900504935.1	5394982	67	20	0	2	0
KLPN.1018.01395	GCF_900505085.1	5499345	68	20	1	1	0
KLPN.1018.01396	GCF_002854355.1	5692917	68	20	0	0	0
KLPN.1018.01397	GCF_900493675.1	5511979	70	20	1	0	0
KLPN.1018.01398	GCF_900504925.1	5465681	70	20	1	0	0
KLPN.1018.01399	GCF_900512425.1	5418329	70	20	0	0	0
KLPN.1018.01400	GCF_900508675.1	5382514	70	20	1	0	0
KLPN.1018.01401	GCF_900511625.1	5456592	70	20	0	0	0
KLPN.1018.01402	GCF_900498915.1	5249438	71	20	0	0	0
KLPN.1018.01403	GCF_900501745.1	5500946	72	20	0	1	0
KLPN.1018.01404	GCF_900513845.1	5398592	72	20	1	1	0
KLPN.1018.01405	GCF_001702405.1	5800512	72	20	1	1	0
KLPN.1018.01406	GCF_900494545.1	5246807	73	20	0	0	0
KLPN.1018.01407	GCF_002258105.1	5564276	73	20	0	2	1
KLPN.1018.01408	GCF_900504725.1	5506196	74	20	0	0	1
KLPN.1018.01409	GCF_900516395.1	5574227	75	20	0	1	0
KLPN.1018.01410	GCF_900511535.1	5486834	76	20	0	3	1
KLPN.1018.01411	GCF_900506455.1	5424766	76	20	1	1	0
KLPN.1018.01412	GCF_900512195.1	5464158	77	20	0	0	0
KLPN.1018.01413	GCF_900502095.1	5504803	77	20	0	0	0
KLPN.1018.01414	GCF_900516955.1	5441471	77	20	0	1	0
KLPN.1018.01415	GCF_900505495.1	5720439	78	20	0	1	0
KLPN.1018.01416	GCF_900503015.1	5460283	78	20	1	1	0
KLPN.1018.01417	GCF_900511635.1	5382356	78	20	0	0	0
KLPN.1018.01418	GCF_002866645.1	5482295	79	20	0	0	0
KLPN.1018.01419	GCF_900494295.1	5606608	81	20	0	0	0
KLPN.1018.01420	GCF_900508955.1	5554234	81	20	0	0	0
KLPN.1018.01421	GCF_900504085.1	5485828	82	20	0	1	0
KLPN.1018.01422	GCF_003227275.1	5620890	83	20	0	0	0
KLPN.1018.01423	GCF_900494005.1	5373968	83	20	0	0	0
KLPN.1018.01424	GCF_900507165.1	5601338	83	20	1	2	0
KLPN.1018.01425	GCF_003226975.1	5588809	83	20	0	0	0
KLPN.1018.01426	GCF_900511885.1	5479685	84	20	1	1	0
KLPN.1018.01427	GCF_900503965.1	5458835	84	20	1	1	0
KLPN.1018.01428	GCF_900515465.1	5465374	84	20	1	1	0
KLPN.1018.01429	GCF_900511765.1	5545773	85	20	1	0	0
KLPN.1018.01430	GCF_002776395.1	5522139	86	20	1	0	0
KLPN.1018.01431	GCF_900513005.1	5314862	87	20	0	0	0
KLPN.1018.01432	GCF_900505665.1	5452508	90	20	1	1	0
KLPN.1018.01433	GCF_900505845.1	5501804	90	20	0	0	0
KLPN.1018.01434	GCF_900506195.1	5343449	90	20	0	0	0
KLPN.1018.01435	GCF_900513225.1	5501732	91	20	1	1	0
KLPN.1018.01436	GCF_900507885.1	5821698	92	20	1	0	0
KLPN.1018.01437	GCF_900511725.1	5574356	92	20	1	0	0
KLPN.1018.01438	GCF_900506265.1	5731536	92	20	0	0	0
KLPN.1018.01439	GCF_002775315.1	5551545	93	20	1	0	0
KLPN.1018.01440	GCF_900503055.1	5483429	94	20	1	1	0
KLPN.1018.01441	GCF_900175095.1	5463110	96	20	1	0	0
KLPN.1018.01442	GCF_001566595.1	5679902	98	20	1	1	0
KLPN.1018.01443	GCF_900506815.1	5584258	99	20	0	2	1
KLPN.1018.01444	GCF_003069585.1	5617903	104	20	0	1	0
KLPN.1018.01445	GCF_900512055.1	5593545	106	20	0	0	0
KLPN.1018.01446	GCF_900172575.1	5420841	107	20	1	1	0
KLPN.1018.01447	GCF_900505285.1	5581738	107	20	0	0	0
KLPN.1018.01448	GCF_900507565.1	5793710	108	20	0	2	1
KLPN.1018.01449	GCF_900514785.1	5474697	108	20	1	1	0
KLPN.1018.01450	GCF_900516755.1	5652277	110	20	0	2	0
KLPN.1018.01451	GCF_900494015.1	5610570	111	20	1	1	0
KLPN.1018.01452	GCF_900512865.1	5650470	115	20	0	0	0
KLPN.1018.01453	GCF_900502295.1	5701402	120	20	0	3	0
KLPN.1018.01454	GCF_900513015.1	5617093	120	20	1	0	0
KLPN.1018.01455	GCF_001647455.1	5624932	123	20	1	2	0
KLPN.1018.01456	GCF_900494595.1	5577349	129	20	0	2	1
KLPN.1018.01457	GCF_900515415.1	5573054	133	20	0	0	0
KLPN.1018.01458	GCF_900507485.1	5762783	134	20	0	1	0
KLPN.1018.01459	GCF_900172725.1	5410025	137	20	0	1	0
KLPN.1018.01460	GCF_002166915.1	5680218	140	20	0	1	1
KLPN.1018.01461	GCF_900507025.1	5699754	140	20	0	0	0
KLPN.1018.01462	GCF_900513255.1	5603483	145	20	1	1	0
KLPN.1018.01463	GCF_900501165.1	5528749	150	20	0	0	0
KLPN.1018.01464	GCF_900500885.1	5647240	156	20	0	0	0
KLPN.1018.01465	GCF_001463555.1	5871817	165	20	0	1	1
KLPN.1018.01466	GCF_900510685.1	5719836	167	20	0	0	0
KLPN.1018.01467	GCF_900407315.1	5616765	168	20	1	0	0
KLPN.1018.01468	GCF_900504155.1	5418527	173	20	1	0	0
KLPN.1018.01469	GCF_900509085.1	5577419	208	20	0	0	0
KLPN.1018.01470	GCF_900503835.1	5637213	208	20	0	0	0
KLPN.1018.01471	GCF_900503465.1	5928452	216	20	0	2	1
KLPN.1018.01472	GCF_900502945.1	5485641	220	20	1	1	0
KLPN.1018.01473	GCF_900507575.1	5763615	243	20	1	2	0
KLPN.1018.01474	GCF_003401375.1	5397071	288	20	0	0	0
KLPN.1018.01475	GCF_900517765.1	5686504	314	20	0	0	0
KLPN.1018.01476	GCF_900503845.1	5500995	383	20	1	1	0
KLPN.1018.01477	GCF_900506135.1	5575637	422	20	1	1	0
KLPN.1018.01478	GCF_900505735.1	5658437	466	20	1	0	0
KLPN.1018.01479	GCF_900501085.1	5922661	615	20	0	0	0
KLPN.1018.01480	GCF_900516245.1	5959807	872	20	0	1	0
KLPN.1018.01481	GCF_001031945.1	5789660	40	21	1	0	0
KLPN.1018.01482	GCF_001968745.2	5493625	41	21	1	1	0
KLPN.1018.01483	GCF_003196835.1	5107925	42	21	0	0	0
KLPN.1018.01484	GCF_002186995.1	5169480	43	21	0	0	0
KLPN.1018.01485	GCF_003195275.1	5281839	43	21	0	0	0
KLPN.1018.01486	GCF_000694535.1	5834689	46	21	0	2	0
KLPN.1018.01487	GCF_000821765.1	5325490	47	21	0	0	0
KLPN.1018.01488	GCF_900171905.1	5211728	48	21	0	0	0
KLPN.1018.01489	GCF_003196815.1	5210680	48	21	0	0	0
KLPN.1018.01490	GCF_003419985.1	5535203	48	21	0	0	0
KLPN.1018.01491	GCF_000693395.1	5400299	48	21	0	0	0
KLPN.1018.01492	GCF_900510855.1	5542760	50	21	0	0	0
KLPN.1018.01493	GCF_002851215.1	5506870	52	21	1	0	0
KLPN.1018.01494	GCF_001968755.2	5516594	54	21	1	1	0
KLPN.1018.01495	GCF_900092905.1	5506001	56	21	0	2	1
KLPN.1018.01496	GCF_002851195.1	5624672	57	21	0	1	0
KLPN.1018.01497	GCF_001701695.1	5532953	57	21	0	1	0
KLPN.1018.01498	GCF_900501565.1	5621901	57	21	0	0	0
KLPN.1018.01499	GCF_001701725.1	5377369	58	21	0	1	0
KLPN.1018.01500	GCF_001647465.1	5526008	59	21	1	1	0
KLPN.1018.01501	GCF_900507695.1	5453904	59	21	1	1	0
KLPN.1018.01502	GCF_900502605.1	5316256	60	21	0	0	0
KLPN.1018.01503	GCF_003346675.1	5480847	60	21	1	0	0
KLPN.1018.01504	GCF_900505015.1	5361037	60	21	0	0	0
KLPN.1018.01505	GCF_900516925.1	5586544	60	21	0	1	0
KLPN.1018.01506	GCF_002187975.1	5477108	61	21	1	1	0
KLPN.1018.01507	GCF_000826795.1	5759509	62	21	1	0	0
KLPN.1018.01508	GCF_002187475.1	5446398	62	21	1	0	0
KLPN.1018.01509	GCF_003346575.1	5481455	62	21	1	2	0
KLPN.1018.01510	GCF_900515915.1	5410867	63	21	0	0	0
KLPN.1018.01511	GCF_900513545.1	5424515	64	21	1	1	0
KLPN.1018.01512	GCF_002186435.1	5381579	64	21	1	0	0
KLPN.1018.01513	GCF_000943155.1	5432780	65	21	1	1	0
KLPN.1018.01514	GCF_900502525.1	5740329	65	21	0	2	0
KLPN.1018.01515	GCF_002854285.1	5490189	66	21	0	1	1
KLPN.1018.01516	GCF_002751525.1	5393254	66	21	1	1	0
KLPN.1018.01517	GCF_900172945.1	5640170	67	21	1	0	0
KLPN.1018.01518	GCF_900506725.1	5464200	67	21	0	0	0
KLPN.1018.01519	GCF_900510635.1	5472055	69	21	1	1	0
KLPN.1018.01520	GCF_900503085.1	5604235	70	21	1	1	0
KLPN.1018.01521	GCF_900502135.1	5483644	70	21	0	0	0
KLPN.1018.01522	GCF_900504395.1	5287117	70	21	0	0	0
KLPN.1018.01523	GCF_900511355.1	5464883	70	21	1	1	0
KLPN.1018.01524	GCF_900510465.1	5520844	71	21	0	0	0
KLPN.1018.01525	GCF_900513795.1	5437315	71	21	1	0	0
KLPN.1018.01526	GCF_900172625.1	5590593	71	21	0	0	0
KLPN.1018.01527	GCF_900493775.1	5230546	73	21	0	0	0
KLPN.1018.01528	GCF_900506005.1	5374634	74	21	1	0	0
KLPN.1018.01529	GCF_900508575.1	5703286	75	21	1	2	0
KLPN.1018.01530	GCF_900502455.1	5373476	76	21	0	0	0
KLPN.1018.01531	GCF_001720815.1	5660703	77	21	1	1	0
KLPN.1018.01532	GCF_900502705.1	5440856	77	21	0	1	0
KLPN.1018.01533	GCF_900503585.1	5352406	78	21	1	0	0
KLPN.1018.01534	GCF_001462965.1	5503479	78	21	0	1	0
KLPN.1018.01535	GCF_002187455.1	5648104	78	21	1	0	0
KLPN.1018.01536	GCF_900511855.1	5492171	78	21	0	0	0
KLPN.1018.01537	GCF_900512085.1	5618917	79	21	0	0	0
KLPN.1018.01538	GCF_900291505.1	5722814	79	21	1	0	0
KLPN.1018.01539	GCF_900505855.1	5467436	79	21	1	1	0
KLPN.1018.01540	GCF_900512415.1	5554611	82	21	1	2	0
KLPN.1018.01541	GCF_900513495.1	5526083	82	21	1	1	0
KLPN.1018.01542	GCF_900504785.1	5449025	83	21	1	1	0
KLPN.1018.01543	GCF_900504515.1	5669028	84	21	1	0	0
KLPN.1018.01544	GCF_003571025.1	5695837	84	21	0	1	0
KLPN.1018.01545	GCF_900503605.1	5500283	85	21	0	2	0
KLPN.1018.01546	GCF_900512575.1	5515585	86	21	1	0	0
KLPN.1018.01547	GCF_900512495.1	5520616	87	21	1	1	0
KLPN.1018.01548	GCF_900511025.1	5611306	89	21	1	0	0
KLPN.1018.01549	GCF_900502685.1	5502519	89	21	0	1	0
KLPN.1018.01550	GCF_900516715.1	5406501	90	21	0	2	0
KLPN.1018.01551	GCF_003382195.1	5497708	91	21	1	0	0
KLPN.1018.01552	GCF_900507385.1	5483293	91	21	1	1	0
KLPN.1018.01553	GCF_900506935.1	5623007	92	21	1	0	0
KLPN.1018.01554	GCF_002186585.1	5598728	92	21	0	1	1
KLPN.1018.01555	GCF_900506295.1	5590444	92	21	0	1	0
KLPN.1018.01556	GCF_900516325.1	5599246	92	21	0	2	0
KLPN.1018.01557	GCF_900512795.1	5755038	92	21	0	3	1
KLPN.1018.01558	GCF_900502085.1	5455129	93	21	0	0	0
KLPN.1018.01559	GCF_002093155.1	5696009	93	21	1	2	0
KLPN.1018.01560	GCF_900514375.1	5516060	94	21	0	0	0
KLPN.1018.01561	GCF_900511875.1	5511545	94	21	0	0	0
KLPN.1018.01562	GCF_900494345.1	5541351	94	21	1	0	1
KLPN.1018.01563	GCF_900510535.1	5541263	95	21	1	1	0
KLPN.1018.01564	GCF_001316845.2	5651487	95	21	1	1	0
KLPN.1018.01565	GCF_900516645.1	5427709	96	21	1	1	0
KLPN.1018.01566	GCF_900505865.1	5578244	96	21	0	0	0
KLPN.1018.01567	GCF_900517615.1	5429935	97	21	0	0	0
KLPN.1018.01568	GCF_002991945.1	5585260	97	21	1	0	0
KLPN.1018.01569	GCF_002851055.1	5449742	97	21	0	2	1
KLPN.1018.01570	GCF_900502235.1	5494293	97	21	1	0	0
KLPN.1018.01571	GCF_001984895.1	5692661	98	21	1	1	0
KLPN.1018.01572	GCF_900508765.1	5656530	100	21	0	2	0
KLPN.1018.01573	GCF_900505815.1	5349784	100	21	0	0	1
KLPN.1018.01574	GCF_900508805.1	5519671	102	21	0	3	1
KLPN.1018.01575	GCF_900503395.1	5726311	103	21	1	2	0
KLPN.1018.01576	GCF_900509195.1	5557091	103	21	1	1	0
KLPN.1018.01577	GCF_900516575.1	5652251	105	21	0	0	0
KLPN.1018.01578	GCF_900501925.1	5568315	105	21	0	0	0
KLPN.1018.01579	GCF_900507315.1	5475384	109	21	1	1	0
KLPN.1018.01580	GCF_002246705.1	5558300	110	21	1	1	0
KLPN.1018.01581	GCF_900503345.1	5758088	111	21	0	1	0
KLPN.1018.01582	GCF_900505335.1	5524882	111	21	1	2	0
KLPN.1018.01583	GCF_003583185.1	5696243	114	21	1	1	0
KLPN.1018.01584	GCF_900516075.1	5505793	116	21	1	1	0
KLPN.1018.01585	GCF_900504055.1	5653368	116	21	0	2	0
KLPN.1018.01586	GCF_900501535.1	5556390	119	21	0	0	0
KLPN.1018.01587	GCF_900507455.1	5792880	119	21	1	1	0
KLPN.1018.01588	GCF_900508015.1	5685668	119	21	0	0	0
KLPN.1018.01589	GCF_000821565.1	5473575	120	21	0	0	0
KLPN.1018.01590	GCF_900498765.1	5567392	124	21	0	0	0
KLPN.1018.01591	GCF_900504855.1	5619616	130	21	0	1	1
KLPN.1018.01592	GCF_900506805.1	5614417	131	21	1	0	0
KLPN.1018.01593	GCF_900501255.1	5449387	134	21	0	0	0
KLPN.1018.01594	GCF_900407185.1	5628565	138	21	1	1	0
KLPN.1018.01595	GCF_900493215.1	5747372	138	21	1	0	0
KLPN.1018.01596	GCF_900172025.1	5284870	139	21	0	0	0
KLPN.1018.01597	GCF_900516145.1	5589359	142	21	1	1	0
KLPN.1018.01598	GCF_900503525.1	5593915	142	21	0	1	0
KLPN.1018.01599	GCF_900517665.1	5782591	151	21	0	0	0
KLPN.1018.01600	GCF_002262175.1	5757957	170	21	1	0	0
KLPN.1018.01601	GCF_900503475.1	5665440	177	21	1	2	0
KLPN.1018.01602	GCF_900172705.1	5563268	196	21	0	1	0
KLPN.1018.01603	GCF_003311785.1	5766088	223	21	1	2	0
KLPN.1018.01604	GCF_900172645.1	5547260	239	21	0	1	0
KLPN.1018.01605	GCF_900493805.1	5737519	255	21	0	0	0
KLPN.1018.01606	GCF_900504655.1	5514049	258	21	1	0	0
KLPN.1018.01607	GCF_900501135.1	5382256	263	21	1	1	0
KLPN.1018.01608	GCF_900504255.1	5505143	421	21	0	1	0
KLPN.1018.01609	GCF_900517275.1	5729273	453	21	1	1	0
KLPN.1018.01610	GCF_900503245.1	5628259	621	21	1	1	0
KLPN.1018.01611	GCF_002890425.1	5327808	35	22	0	0	0
KLPN.1018.01612	GCF_000822105.1	5220182	36	22	0	0	0
KLPN.1018.01613	GCF_900084915.1	5294563	41	22	0	0	0
KLPN.1018.01614	GCF_000567785.1	5570274	45	22	2	0	0
KLPN.1018.01615	GCF_002108275.1	5395829	53	22	1	1	0
KLPN.1018.01616	GCF_003253855.1	5247212	54	22	0	0	0
KLPN.1018.01617	GCF_900085005.1	5361357	55	22	1	1	0
KLPN.1018.01618	GCF_002854855.1	5173904	55	22	0	1	0
KLPN.1018.01619	GCF_900084605.1	5232239	56	22	0	0	0
KLPN.1018.01620	GCF_900515755.1	5371754	58	22	0	0	0
KLPN.1018.01621	GCF_001549995.1	5397436	59	22	0	1	0
KLPN.1018.01622	GCF_900509895.1	5458586	59	22	0	0	0
KLPN.1018.01623	GCF_900502125.1	5483877	59	22	0	0	0
KLPN.1018.01624	GCF_002187615.1	5236870	61	22	0	0	0
KLPN.1018.01625	GCF_002187395.1	5789664	61	22	1	1	0
KLPN.1018.01626	GCF_900508465.1	5501330	65	22	1	0	0
KLPN.1018.01627	GCF_900502635.1	5455278	65	22	1	1	0
KLPN.1018.01628	GCF_900503125.1	5433057	65	22	1	0	0
KLPN.1018.01629	GCF_900506475.1	5429091	65	22	0	0	0
KLPN.1018.01630	GCF_900509105.1	5411170	66	22	0	0	0
KLPN.1018.01631	GCF_900506445.1	5464696	66	22	1	1	0
KLPN.1018.01632	GCF_900494365.1	5565116	66	22	1	1	0
KLPN.1018.01633	GCF_900505715.1	5408845	68	22	0	0	0
KLPN.1018.01634	GCF_002751605.1	5417662	68	22	1	1	0
KLPN.1018.01635	GCF_001718115.1	5702010	69	22	1	1	0
KLPN.1018.01636	GCF_900510765.1	5475842	69	22	0	1	0
KLPN.1018.01637	GCF_900493305.1	5667864	70	22	1	0	0
KLPN.1018.01638	GCF_000982045.1	5587392	70	22	2	2	2
KLPN.1018.01639	GCF_900504645.1	5624021	70	22	0	0	0
KLPN.1018.01640	GCF_900513835.1	5620101	70	22	1	1	0
KLPN.1018.01641	GCF_002186465.1	5546880	70	22	1	1	0
KLPN.1018.01642	GCF_900501785.1	5548871	70	22	0	0	0
KLPN.1018.01643	GCF_900510575.1	5433161	70	22	0	0	0
KLPN.1018.01644	GCF_003466135.1	5511356	71	22	0	0	0
KLPN.1018.01645	GCF_900494055.1	5677586	72	22	0	0	0
KLPN.1018.01646	GCF_900512095.1	5518931	72	22	0	0	0
KLPN.1018.01647	GCF_900511445.1	5514379	72	22	1	1	0
KLPN.1018.01648	GCF_900509955.1	5519703	72	22	0	2	0
KLPN.1018.01649	GCF_002853735.1	5641930	72	22	0	1	0
KLPN.1018.01650	GCF_900510165.1	5570459	73	22	1	2	0
KLPN.1018.01651	GCF_900512835.1	5383766	73	22	0	2	0
KLPN.1018.01652	GCF_002751645.1	5455328	73	22	1	1	0
KLPN.1018.01653	GCF_900510415.1	5452600	74	22	0	2	1
KLPN.1018.01654	GCF_900513105.1	5559976	74	22	0	0	1
KLPN.1018.01655	GCF_900493435.1	5604479	75	22	1	1	0
KLPN.1018.01656	GCF_002188185.1	5477596	75	22	0	2	1
KLPN.1018.01657	GCF_900513875.1	5811908	76	22	0	1	1
KLPN.1018.01658	GCF_900514075.1	5524416	78	22	1	1	0
KLPN.1018.01659	GCF_002187295.1	5436032	78	22	0	1	0
KLPN.1018.01660	GCF_900516295.1	5623154	78	22	1	1	0
KLPN.1018.01661	GCF_900517025.1	5481220	79	22	1	1	0
KLPN.1018.01662	GCF_900511495.1	5671474	79	22	1	0	0
KLPN.1018.01663	GCF_002187805.1	5371143	80	22	1	0	0
KLPN.1018.01664	GCF_900501265.1	5578216	80	22	1	1	0
KLPN.1018.01665	GCF_900504535.1	5482884	80	22	1	0	0
KLPN.1018.01666	GCF_900503805.1	5552652	81	22	1	0	0
KLPN.1018.01667	GCF_900504275.1	5379351	82	22	1	1	0
KLPN.1018.01668	GCF_900506175.1	5627890	82	22	1	0	0
KLPN.1018.01669	GCF_002853095.1	5419205	83	22	0	0	0
KLPN.1018.01670	GCF_900512255.1	5596430	83	22	1	1	0
KLPN.1018.01671	GCF_900516465.1	5591211	84	22	1	0	0
KLPN.1018.01672	GCF_001939845.1	5520374	84	22	1	0	0
KLPN.1018.01673	GCF_900511345.1	5572098	84	22	0	2	0
KLPN.1018.01674	GCF_900504105.1	5596004	84	22	0	0	0
KLPN.1018.01675	GCF_900513455.1	5543662	85	22	1	1	0
KLPN.1018.01676	GCF_900515575.1	5479766	85	22	1	1	0
KLPN.1018.01677	GCF_900086405.1	5524890	85	22	0	0	0
KLPN.1018.01678	GCF_000710095.1	5433764	85	22	0	0	0
KLPN.1018.01679	GCF_003063185.1	5506116	85	22	0	1	1
KLPN.1018.01680	GCF_900511775.1	5534051	87	22	1	1	0
KLPN.1018.01681	GCF_003012855.1	5360092	88	22	1	0	0
KLPN.1018.01682	GCF_002852065.1	5622297	88	22	1	4	0
KLPN.1018.01683	GCF_000821365.1	5426655	89	22	0	2	1
KLPN.1018.01684	GCF_900506985.1	5831834	89	22	1	1	0
KLPN.1018.01685	GCF_900507055.1	5732289	89	22	1	2	0
KLPN.1018.01686	GCF_002795635.1	5360340	90	22	0	0	0
KLPN.1018.01687	GCF_002775295.1	5673897	90	22	1	1	0
KLPN.1018.01688	GCF_003571035.1	5637250	91	22	0	1	0
KLPN.1018.01689	GCF_900502065.1	5642421	92	22	1	1	0
KLPN.1018.01690	GCF_900506315.1	5453127	92	22	0	2	0
KLPN.1018.01691	GCF_900508815.1	5501864	92	22	0	0	0
KLPN.1018.01692	GCF_002775265.1	5729787	92	22	1	1	0
KLPN.1018.01693	GCF_900509095.1	5729423	93	22	1	1	0
KLPN.1018.01694	GCF_900516685.1	5762374	94	22	0	1	1
KLPN.1018.01695	GCF_900502265.1	5616148	94	22	0	0	1
KLPN.1018.01696	GCF_900515565.1	5622007	94	22	0	0	0
KLPN.1018.01697	GCF_900503315.1	5647898	94	22	0	0	0
KLPN.1018.01698	GCF_900505685.1	5839931	95	22	0	2	0
KLPN.1018.01699	GCF_900510505.1	5607933	95	22	1	1	0
KLPN.1018.01700	GCF_001699045.1	5128911	96	22	0	1	0
KLPN.1018.01701	GCF_900501035.1	5522143	96	22	1	1	0
KLPN.1018.01702	GCF_900508505.1	5734321	97	22	0	2	1
KLPN.1018.01703	GCF_900501965.1	5606083	97	22	1	1	0
KLPN.1018.01704	GCF_900086125.1	5493082	99	22	0	0	0
KLPN.1018.01705	GCF_900516615.1	5635727	99	22	0	1	0
KLPN.1018.01706	GCF_900173685.1	5597828	101	22	0	0	0
KLPN.1018.01707	GCF_001720875.1	5712694	102	22	1	2	0
KLPN.1018.01708	GCF_003036645.1	5491855	102	22	0	1	0
KLPN.1018.01709	GCF_900517295.1	5408767	102	22	0	0	0
KLPN.1018.01710	GCF_900516635.1	5639883	103	22	0	2	0
KLPN.1018.01711	GCF_900506095.1	5634590	104	22	1	0	0
KLPN.1018.01712	GCF_900494175.1	5696218	104	22	1	0	0
KLPN.1018.01713	GCF_900501645.1	5683989	105	22	0	4	1
KLPN.1018.01714	GCF_900509005.1	5563445	109	22	0	3	0
KLPN.1018.01715	GCF_900509035.1	5624100	111	22	0	0	0
KLPN.1018.01716	GCF_003065045.1	5234006	114	22	0	1	0
KLPN.1018.01717	GCF_900500805.1	5580730	117	22	1	1	0
KLPN.1018.01718	GCF_001720705.1	5701390	119	22	0	1	1
KLPN.1018.01719	GCF_900507015.1	6022556	120	22	0	0	0
KLPN.1018.01720	GCF_900503195.1	5582488	120	22	1	1	0
KLPN.1018.01721	GCF_002261615.1	5262503	121	22	0	0	0
KLPN.1018.01722	GCF_002934725.1	5601764	123	22	1	0	0
KLPN.1018.01723	GCF_900503785.1	5607636	125	22	1	1	0
KLPN.1018.01724	GCF_900516735.1	5670249	126	22	0	0	0
KLPN.1018.01725	GCF_900503325.1	5722283	128	22	0	0	0
KLPN.1018.01726	GCF_900514615.1	5275503	128	22	0	0	0
KLPN.1018.01727	GCF_900504215.1	5513055	133	22	0	0	0
KLPN.1018.01728	GCF_900507745.1	5650161	134	22	1	0	0
KLPN.1018.01729	GCF_900407035.1	5741042	147	22	1	1	0
KLPN.1018.01730	GCF_900503655.1	5841843	147	22	0	0	0
KLPN.1018.01731	GCF_900514195.1	5844089	158	22	0	0	0
KLPN.1018.01732	GCF_900504865.1	5598900	159	22	1	0	0
KLPN.1018.01733	GCF_900172165.1	5608559	168	22	1	1	0
KLPN.1018.01734	GCF_900514315.1	5640383	191	22	1	0	0
KLPN.1018.01735	GCF_900172615.1	5564701	193	22	0	1	0
KLPN.1018.01736	GCF_900173485.1	5564471	194	22	0	0	0
KLPN.1018.01737	GCF_900173925.1	5564034	195	22	0	0	0
KLPN.1018.01738	GCF_900172815.1	5555851	208	22	0	0	0
KLPN.1018.01739	GCF_900172585.1	5557292	212	22	0	1	0
KLPN.1018.01740	GCF_900500735.1	5688444	227	22	1	1	0
KLPN.1018.01741	GCF_900506845.1	5708288	228	22	1	0	0
KLPN.1018.01742	GCF_900173945.1	5557325	239	22	0	1	0
KLPN.1018.01743	GCF_003037935.1	5618319	250	22	0	3	1
KLPN.1018.01744	GCF_900515615.1	5684351	258	22	1	1	0
KLPN.1018.01745	GCF_900503795.1	5445120	277	22	0	0	0
KLPN.1018.01746	GCF_900173495.1	5534622	289	22	0	0	0
KLPN.1018.01747	GCF_900500915.1	5594899	541	22	0	0	0
KLPN.1018.01748	GCF_900503515.1	5794037	574	22	1	3	0
KLPN.1018.01749	GCF_900085255.1	5461198	39	23	0	0	0
KLPN.1018.01750	GCF_002845905.1	5335808	40	23	0	0	0
KLPN.1018.01751	GCF_001404095.1	5271927	46	23	0	0	0
KLPN.1018.01752	GCF_000826605.1	5647379	47	23	1	1	0
KLPN.1018.01753	GCF_000949515.1	5450975	49	23	0	0	0
KLPN.1018.01754	GCF_003195415.1	5255413	50	23	0	0	0
KLPN.1018.01755	GCF_001033585.1	5714234	52	23	0	1	1
KLPN.1018.01756	GCF_900492785.1	5671521	52	23	1	0	0
KLPN.1018.01757	GCF_900084515.1	5358217	52	23	1	0	0
KLPN.1018.01758	GCF_000821905.1	5539119	54	23	0	0	0
KLPN.1018.01759	GCF_002854195.1	5631985	56	23	0	0	0
KLPN.1018.01760	GCF_003346605.1	5452426	57	23	1	1	0
KLPN.1018.01761	GCF_000492775.1	5605323	60	23	1	0	0
KLPN.1018.01762	GCF_002300775.1	5368010	61	23	0	1	0
KLPN.1018.01763	GCF_002187405.1	5422568	64	23	0	0	0
KLPN.1018.01764	GCF_002264845.1	5669428	65	23	0	0	0
KLPN.1018.01765	GCF_900506365.1	5382461	66	23	1	1	0
KLPN.1018.01766	GCF_003316235.1	5608288	67	23	0	0	0
KLPN.1018.01767	GCF_900517115.1	5482542	69	23	0	1	0
KLPN.1018.01768	GCF_002187785.1	5464972	70	23	1	1	0
KLPN.1018.01769	GCF_900512335.1	5608539	70	23	1	1	0
KLPN.1018.01770	GCF_900092985.1	5714162	72	23	1	0	0
KLPN.1018.01771	GCF_900501545.1	5606689	72	23	1	0	0
KLPN.1018.01772	GCF_900506395.1	5561602	73	23	1	0	0
KLPN.1018.01773	GCF_002186865.1	5429228	73	23	1	0	0
KLPN.1018.01774	GCF_002187835.1	5365052	73	23	1	0	0
KLPN.1018.01775	GCF_900513735.1	5555345	75	23	0	1	0
KLPN.1018.01776	GCF_900513485.1	5498214	76	23	1	1	0
KLPN.1018.01777	GCF_900173465.1	5576014	76	23	0	1	0
KLPN.1018.01778	GCF_900503335.1	5477961	76	23	1	1	0
KLPN.1018.01779	GCF_900504365.1	5660568	76	23	0	1	0
KLPN.1018.01780	GCF_900510525.1	5383859	77	23	0	2	0
KLPN.1018.01781	GCF_900506375.1	5474447	77	23	1	1	0
KLPN.1018.01782	GCF_003195735.1	5523542	77	23	1	1	0
KLPN.1018.01783	GCF_001031875.1	5417603	78	23	0	0	0
KLPN.1018.01784	GCF_900494635.1	5704021	79	23	1	2	0
KLPN.1018.01785	GCF_003062545.1	5670356	79	23	0	1	1
KLPN.1018.01786	GCF_900510375.1	5539739	80	23	0	0	0
KLPN.1018.01787	GCF_900510205.1	5384598	80	23	1	2	0
KLPN.1018.01788	GCF_900512615.1	5642647	80	23	1	0	0
KLPN.1018.01789	GCF_900507755.1	5743551	81	23	0	1	1
KLPN.1018.01790	GCF_003382185.1	5698549	81	23	0	1	1
KLPN.1018.01791	GCF_001665995.1	5545261	81	23	0	0	0
KLPN.1018.01792	GCF_001701625.1	5534967	81	23	0	1	0
KLPN.1018.01793	GCF_003034385.1	6011618	82	23	0	1	0
KLPN.1018.01794	GCF_900514705.1	5628966	82	23	1	1	0
KLPN.1018.01795	GCF_900505155.1	5490383	83	23	0	1	0
KLPN.1018.01796	GCF_900173625.1	5618013	84	23	0	0	0
KLPN.1018.01797	GCF_900512025.1	5410348	84	23	0	0	0
KLPN.1018.01798	GCF_900503115.1	5505798	84	23	0	1	1
KLPN.1018.01799	GCF_900516545.1	5607329	84	23	0	3	1
KLPN.1018.01800	GCF_900507625.1	5657656	84	23	0	4	1
KLPN.1018.01801	GCF_000785625.1	5716014	84	23	0	1	0
KLPN.1018.01802	GCF_900510265.1	5667980	85	23	1	0	0
KLPN.1018.01803	GCF_900502875.1	5506560	87	23	1	1	0
KLPN.1018.01804	GCF_002411885.1	5418827	87	23	0	0	0
KLPN.1018.01805	GCF_900512605.1	5598921	89	23	1	0	0
KLPN.1018.01806	GCF_001463215.1	5579363	90	23	1	1	0
KLPN.1018.01807	GCF_900511005.1	5553918	91	23	0	0	0
KLPN.1018.01808	GCF_002248635.1	5464124	91	23	0	2	1
KLPN.1018.01809	GCF_002895645.1	5541217	92	23	1	1	0
KLPN.1018.01810	GCF_900510485.1	5602628	93	23	1	1	0
KLPN.1018.01811	GCF_900510355.1	5571813	94	23	1	1	0
KLPN.1018.01812	GCF_900517545.1	5604367	96	23	1	2	0
KLPN.1018.01813	GCF_900093185.1	5815732	96	23	1	0	0
KLPN.1018.01814	GCF_900494585.1	5578072	96	23	1	0	0
KLPN.1018.01815	GCF_000735285.1	5328299	97	23	0	0	0
KLPN.1018.01816	GCF_900504445.1	5669527	99	23	0	1	0
KLPN.1018.01817	GCF_900180825.1	5477104	100	23	1	1	0
KLPN.1018.01818	GCF_900515635.1	5517797	100	23	0	0	0
KLPN.1018.01819	GCF_900511565.1	5710070	100	23	1	1	0
KLPN.1018.01820	GCF_900503695.1	5598307	104	23	0	2	0
KLPN.1018.01821	GCF_900493375.1	5511460	104	23	0	0	0
KLPN.1018.01822	GCF_900500745.1	5648215	105	23	1	1	0
KLPN.1018.01823	GCF_900516825.1	5660148	107	23	0	2	0
KLPN.1018.01824	GCF_900516605.1	5723025	107	23	0	3	0
KLPN.1018.01825	GCF_900502975.1	5724943	107	23	0	3	1
KLPN.1018.01826	GCF_900494625.1	5513127	113	23	0	0	0
KLPN.1018.01827	GCF_900505375.1	5788773	114	23	0	3	1
KLPN.1018.01828	GCF_002166955.1	5580815	115	23	1	1	0
KLPN.1018.01829	GCF_001884385.1	5575333	117	23	1	0	0
KLPN.1018.01830	GCF_003227035.1	5538342	119	23	1	1	0
KLPN.1018.01831	GCF_900507795.1	5673139	120	23	1	1	0
KLPN.1018.01832	GCF_002853465.1	5497542	124	23	1	0	0
KLPN.1018.01833	GCF_900511975.1	5770757	124	23	1	1	0
KLPN.1018.01834	GCF_900509155.1	5715527	126	23	1	1	0
KLPN.1018.01835	GCF_900086105.1	5534176	127	23	0	1	0
KLPN.1018.01836	GCF_900502165.1	5595164	128	23	0	1	0
KLPN.1018.01837	GCF_900517135.1	5658312	130	23	0	2	0
KLPN.1018.01838	GCF_900406985.1	5517083	131	23	1	1	0
KLPN.1018.01839	GCF_900501275.1	5571216	136	23	0	0	0
KLPN.1018.01840	GCF_003227055.1	5665686	136	23	0	0	0
KLPN.1018.01841	GCF_900516185.1	5685577	153	23	0	0	0
KLPN.1018.01842	GCF_900500715.1	5684652	163	23	1	1	0
KLPN.1018.01843	GCF_900516675.1	5650947	171	23	1	0	0
KLPN.1018.01844	GCF_900503555.1	5537794	181	23	1	1	0
KLPN.1018.01845	GCF_900501315.1	5499207	189	23	0	0	0
KLPN.1018.01846	GCF_900501005.1	5634007	197	23	0	0	0
KLPN.1018.01847	GCF_900515125.1	5580339	216	23	1	1	0
KLPN.1018.01848	GCF_900506515.1	5657460	242	23	0	0	0
KLPN.1018.01849	GCF_900511145.1	5687576	259	23	0	0	0
KLPN.1018.01850	GCF_900515655.1	5599412	347	23	1	1	0
KLPN.1018.01851	GCF_900504715.1	5641812	358	23	0	0	0
KLPN.1018.01852	GCF_900174405.1	5481306	368	23	0	0	0
KLPN.1018.01853	GCF_900502995.1	5678583	372	23	1	1	0
KLPN.1018.01854	GCF_900505765.1	5719201	407	23	0	0	0
KLPN.1018.01855	GCF_900516725.1	5725776	468	23	0	2	0
KLPN.1018.01856	GCF_900508795.1	5664105	475	23	0	0	0
KLPN.1018.01857	GCF_001721565.1	5452890	565	23	0	0	0
KLPN.1018.01858	GCF_900504355.1	5786500	622	23	0	0	0
KLPN.1018.01859	GCF_900084965.1	5328518	46	24	0	0	0
KLPN.1018.01860	GCF_900180795.1	5424743	50	24	1	1	0
KLPN.1018.01861	GCF_003346635.1	5416815	56	24	1	0	0
KLPN.1018.01862	GCF_900085625.1	5426534	57	24	1	1	0
KLPN.1018.01863	GCF_900092735.1	5532486	59	24	1	0	0
KLPN.1018.01864	GCF_900085345.1	5521900	59	24	0	1	0
KLPN.1018.01865	GCF_900093215.1	5516827	59	24	1	1	1
KLPN.1018.01866	GCF_900086275.1	5598559	60	24	1	1	0
KLPN.1018.01867	GCF_900085305.1	5541197	62	24	1	1	0
KLPN.1018.01868	GCF_002247625.1	5409448	62	24	0	0	0
KLPN.1018.01869	GCF_001720765.1	5551793	63	24	0	0	0
KLPN.1018.01870	GCF_002851155.1	5240903	63	24	1	0	0
KLPN.1018.01871	GCF_900510795.1	5459163	63	24	0	0	1
KLPN.1018.01872	GCF_003195775.1	5359275	64	24	1	1	0
KLPN.1018.01873	GCF_900086095.1	5307229	65	24	0	0	0
KLPN.1018.01874	GCF_001597075.1	5477205	65	24	1	1	0
KLPN.1018.01875	GCF_900086505.1	5581683	65	24	0	0	0
KLPN.1018.01876	GCF_900086515.1	5547389	66	24	1	1	0
KLPN.1018.01877	GCF_002854035.1	5697046	66	24	1	1	0
KLPN.1018.01878	GCF_000822005.1	5641921	67	24	1	1	0
KLPN.1018.01879	GCF_003196695.1	5341461	68	24	0	0	0
KLPN.1018.01880	GCF_000788025.1	5590652	70	24	0	0	0
KLPN.1018.01881	GCF_002248045.1	5738376	71	24	1	0	0
KLPN.1018.01882	GCF_900514005.1	5406716	71	24	1	0	0
KLPN.1018.01883	GCF_900512165.1	5574775	72	24	1	0	0
KLPN.1018.01884	GCF_900084885.1	5483600	72	24	1	1	0
KLPN.1018.01885	GCF_900508175.1	5506192	72	24	0	0	0
KLPN.1018.01886	GCF_900511105.1	5610555	73	24	0	0	1
KLPN.1018.01887	GCF_900507585.1	5661291	74	24	0	1	0
KLPN.1018.01888	GCF_003346525.1	5524635	74	24	1	2	0
KLPN.1018.01889	GCF_002187255.1	5655926	75	24	1	1	0
KLPN.1018.01890	GCF_900513725.1	5601619	75	24	1	0	0
KLPN.1018.01891	GCF_000822225.1	5357256	75	24	0	0	0
KLPN.1018.01892	GCF_900511915.1	5628437	76	24	1	0	0
KLPN.1018.01893	GCF_001931705.1	5427001	76	24	0	0	0
KLPN.1018.01894	GCF_900505045.1	5567621	78	24	1	1	0
KLPN.1018.01895	GCF_900512285.1	5462918	78	24	1	0	0
KLPN.1018.01896	GCF_900508115.1	5488232	78	24	0	0	0
KLPN.1018.01897	GCF_900511405.1	5579840	79	24	1	1	0
KLPN.1018.01898	GCF_900498695.1	5468974	79	24	0	0	0
KLPN.1018.01899	GCF_900502855.1	5309691	80	24	0	0	0
KLPN.1018.01900	GCF_900493645.1	5469165	81	24	1	1	0
KLPN.1018.01901	GCF_900506125.1	5567685	81	24	1	1	0
KLPN.1018.01902	GCF_900512715.1	5506225	82	24	0	0	0
KLPN.1018.01903	GCF_900086145.1	5486218	83	24	0	1	0
KLPN.1018.01904	GCF_002246635.1	5656480	83	24	1	1	0
KLPN.1018.01905	GCF_900511555.1	5663811	84	24	0	2	0
KLPN.1018.01906	GCF_002187535.1	5581730	85	24	1	0	0
KLPN.1018.01907	GCF_900493825.1	5794323	85	24	1	3	0
KLPN.1018.01908	GCF_900516745.1	5696062	87	24	0	2	0
KLPN.1018.01909	GCF_900505205.1	5576669	89	24	1	0	0
KLPN.1018.01910	GCF_001701355.1	5623115	89	24	1	0	0
KLPN.1018.01911	GCF_002918585.1	5481534	89	24	0	3	1
KLPN.1018.01912	GCF_900508085.1	5438280	90	24	0	0	0
KLPN.1018.01913	GCF_002853525.1	5633311	91	24	1	0	0
KLPN.1018.01914	GCF_003057335.1	5368317	92	24	0	0	0
KLPN.1018.01915	GCF_900511965.1	5513102	93	24	1	2	0
KLPN.1018.01916	GCF_900181075.1	5618161	93	24	1	1	0
KLPN.1018.01917	GCF_900501215.1	5602780	93	24	1	1	0
KLPN.1018.01918	GCF_900504995.1	5499982	93	24	0	1	1
KLPN.1018.01919	GCF_900505165.1	5645870	94	24	0	4	0
KLPN.1018.01920	GCF_900517645.1	5577487	95	24	1	1	0
KLPN.1018.01921	GCF_900509145.1	5582588	96	24	1	1	0
KLPN.1018.01922	GCF_002257975.1	5432785	96	24	1	0	0
KLPN.1018.01923	GCF_900501575.1	5578719	96	24	0	1	0
KLPN.1018.01924	GCF_001701845.1	5611808	97	24	0	1	0
KLPN.1018.01925	GCF_002776375.1	5611837	98	24	0	1	1
KLPN.1018.01926	GCF_900501795.1	5547647	99	24	0	1	0
KLPN.1018.01927	GCF_900516595.1	5612110	99	24	0	2	0
KLPN.1018.01928	GCF_001875525.1	5513269	99	24	0	2	1
KLPN.1018.01929	GCF_900516555.1	5652528	101	24	0	1	0
KLPN.1018.01930	GCF_001699015.1	5183602	101	24	0	1	0
KLPN.1018.01931	GCF_900517475.1	5771429	103	24	0	0	0
KLPN.1018.01932	GCF_900517435.1	5512759	104	24	0	0	0
KLPN.1018.01933	GCF_002853395.1	5465790	107	24	0	0	0
KLPN.1018.01934	GCF_900514595.1	5556608	107	24	0	1	0
KLPN.1018.01935	GCF_900507705.1	5501451	110	24	0	1	0
KLPN.1018.01936	GCF_900508875.1	5679953	110	24	1	1	0
KLPN.1018.01937	GCF_900517365.1	5475608	111	24	1	1	0
KLPN.1018.01938	GCF_900513865.1	5652188	113	24	1	0	0
KLPN.1018.01939	GCF_900493905.1	5745446	116	24	1	0	0
KLPN.1018.01940	GCF_003321095.1	5583903	119	24	0	0	0
KLPN.1018.01941	GCF_900517395.1	5357735	120	24	0	0	0
KLPN.1018.01942	GCF_900516415.1	5723259	120	24	0	2	1
KLPN.1018.01943	GCF_900517455.1	5691636	122	24	0	0	0
KLPN.1018.01944	GCF_900505805.1	5757930	123	24	0	1	0
KLPN.1018.01945	GCF_900500785.1	5217315	125	24	0	0	0
KLPN.1018.01946	GCF_900511845.1	5904668	125	24	1	1	0
KLPN.1018.01947	GCF_900516765.1	5545087	127	24	1	0	0
KLPN.1018.01948	GCF_001720845.1	5490193	132	24	0	1	1
KLPN.1018.01949	GCF_900407285.1	5458436	132	24	1	1	0
KLPN.1018.01950	GCF_900407015.1	5500753	134	24	1	1	0
KLPN.1018.01951	GCF_900517375.1	5776448	134	24	0	2	1
KLPN.1018.01952	GCF_900503735.1	5774150	134	24	1	0	0
KLPN.1018.01953	GCF_900517505.1	5687226	136	24	1	2	0
KLPN.1018.01954	GCF_900515605.1	5613778	140	24	1	1	0
KLPN.1018.01955	GCF_900507645.1	5702095	141	24	1	1	0
KLPN.1018.01956	GCF_900507615.1	5747252	143	24	0	4	1
KLPN.1018.01957	GCF_900498405.1	5772910	144	24	0	0	0
KLPN.1018.01958	GCF_900502725.1	5687884	147	24	0	2	0
KLPN.1018.01959	GCF_900505755.1	5378610	150	24	0	0	0
KLPN.1018.01960	GCF_900502845.1	5363021	156	24	0	0	0
KLPN.1018.01961	GCF_900515245.1	5685109	176	24	0	0	0
KLPN.1018.01962	GCF_900498435.1	5784789	183	24	0	0	0
KLPN.1018.01963	GCF_900504165.1	5707159	187	24	0	0	0
KLPN.1018.01964	GCF_900493695.1	5618143	198	24	0	4	1
KLPN.1018.01965	GCF_900507635.1	5784903	238	24	0	4	1
KLPN.1018.01966	GCF_003262195.1	5553173	251	24	0	1	1
KLPN.1018.01967	GCF_900173955.1	5522333	272	24	0	0	0
KLPN.1018.01968	GCF_900504065.1	5741362	291	24	0	1	0
KLPN.1018.01969	GCF_000565135.1	5959983	315	24	1	1	0
KLPN.1018.01970	GCF_900501685.1	5850460	368	24	0	2	1
KLPN.1018.01971	GCF_900508445.1	5623066	370	24	1	1	0
KLPN.1018.01972	GCF_002152675.1	5615282	43	25	1	1	0
KLPN.1018.01973	GCF_900085675.1	5485855	54	25	1	1	0
KLPN.1018.01974	GCF_000822025.1	5422634	57	25	1	1	0
KLPN.1018.01975	GCF_003195195.1	5290492	57	25	0	0	0
KLPN.1018.01976	GCF_900084315.1	5436312	57	25	1	1	0
KLPN.1018.01977	GCF_003345475.1	5469561	59	25	0	1	0
KLPN.1018.01978	GCF_900085885.1	5291848	59	25	1	1	0
KLPN.1018.01979	GCF_002853165.1	5553370	60	25	0	0	0
KLPN.1018.01980	GCF_900084815.1	5506435	60	25	1	0	0
KLPN.1018.01981	GCF_900084425.1	5398104	61	25	1	1	0
KLPN.1018.01982	GCF_003195755.1	5608376	63	25	1	0	0
KLPN.1018.01983	GCF_002181875.1	5665818	64	25	1	1	0
KLPN.1018.01984	GCF_003346445.1	5648132	66	25	1	1	0
KLPN.1018.01985	GCF_001929345.1	5561554	66	25	0	0	0
KLPN.1018.01986	GCF_001720625.1	5431785	68	25	0	0	0
KLPN.1018.01987	GCF_002085995.1	5531060	68	25	0	0	0
KLPN.1018.01988	GCF_003196895.1	5465138	69	25	1	1	0
KLPN.1018.01989	GCF_002248815.1	5426983	69	25	1	0	0
KLPN.1018.01990	GCF_002102635.1	5516867	69	25	0	0	0
KLPN.1018.01991	GCF_003196655.1	5378966	71	25	0	0	0
KLPN.1018.01992	GCF_900493035.1	5654773	71	25	0	1	0
KLPN.1018.01993	GCF_003196855.1	5671875	71	25	0	0	0
KLPN.1018.01994	GCF_003065165.1	5224880	72	25	0	0	0
KLPN.1018.01995	GCF_900084805.1	5571040	72	25	0	0	0
KLPN.1018.01996	GCF_900508425.1	5549678	72	25	0	1	1
KLPN.1018.01997	GCF_900510605.1	5517647	73	25	0	1	1
KLPN.1018.01998	GCF_001701575.1	5536628	74	25	0	2	0
KLPN.1018.01999	GCF_002257865.1	5459659	74	25	0	1	0
[truncated: 1,981 more rows]
