# Supplementary material for: IntegronFinder 2.0: Identification and Analysis of Integrons across Bacteria, with a Focus on Antibiotic Resistance in Klebsiella
Source: Microorganisms. 2022 Mar 24;10(4):700. doi: 10.3390/microorganisms10040700 (PMC9024848; doi:10.3390/microorganisms10040700)
Supplement: Supplementary file 1 [file microorganisms-10-00700-s001.zip › table_s3.xlsx]

## Sheet: Sheet1
	replicon_name	integron_in_replicon_id	integron_type	#attC	#protein	isolate_assembly_id	isolate_name
0	ABPH001.0321.00001.C001	integron_01	CALIN	2	3	GCF_016592595.1	Abyssogena phaseoliformis symbiont OG214
1	ABPH001.0321.00001.C001	integron_02	complete	1	1	GCF_016592595.1	Abyssogena phaseoliformis symbiont OG214
2	ACAV001.0321.00001.C001	integron_01	CALIN	3	2	GCF_000176855.2	Acidovorax avenae subsp. avenae ATCC 19860
3	ACBA002.0321.00006.P002	integron_01	CALIN	2	3	GCF_000828935.1	Acinetobacter baumannii
4	ACBA002.0321.00007.C001	integron_01	complete	4	6	GCF_000830055.1	Acinetobacter baumannii
5	ACBA002.0321.00008.C001	integron_01	CALIN	3	4	GCF_000939415.2	Acinetobacter baumannii
6	ACBA002.0321.00009.P002	integron_01	CALIN	3	4	GCF_000963815.1	Acinetobacter baumannii
7	ACBA002.0321.00009.P002	integron_02	complete	2	4	GCF_000963815.1	Acinetobacter baumannii
8	ACBA002.0321.00010.C001	integron_01	CALIN	3	4	GCF_001026965.1	Acinetobacter baumannii
9	ACBA002.0321.00018.C001	integron_01	CALIN	3	4	GCF_001514375.1	Acinetobacter baumannii
10	ACBA002.0321.00018.C001	integron_02	complete	4	6	GCF_001514375.1	Acinetobacter baumannii
11	ACBA002.0321.00020.C001	integron_01	CALIN	3	4	GCF_001543995.1	Acinetobacter baumannii
12	ACBA002.0321.00020.C001	integron_02	CALIN	3	4	GCF_001543995.1	Acinetobacter baumannii
13	ACBA002.0321.00023.C001	integron_01	CALIN	3	4	GCF_001573105.1	Acinetobacter baumannii
14	ACBA002.0321.00024.C001	integron_01	CALIN	3	4	GCF_001573125.1	Acinetobacter baumannii
15	ACBA002.0321.00024.C001	integron_02	complete	4	6	GCF_001573125.1	Acinetobacter baumannii
16	ACBA002.0321.00029.C001	integron_01	complete	2	4	GCF_001669145.2	Acinetobacter baumannii
17	ACBA002.0321.00030.C001	integron_01	complete	2	4	GCF_001674475.2	Acinetobacter baumannii
18	ACBA002.0321.00031.C001	integron_01	complete	2	4	GCF_001674505.2	Acinetobacter baumannii
19	ACBA002.0321.00034.C001	integron_01	CALIN	3	4	GCF_001806365.1	Acinetobacter baumannii
20	ACBA002.0321.00036.C001	integron_01	CALIN	3	4	GCF_001806405.1	Acinetobacter baumannii
21	ACBA002.0321.00037.C001	integron_01	CALIN	3	4	GCF_001806425.1	Acinetobacter baumannii
22	ACBA002.0321.00038.C001	integron_01	CALIN	3	4	GCF_001806445.1	Acinetobacter baumannii
23	ACBA002.0321.00039.C001	integron_01	CALIN	3	4	GCF_001806465.1	Acinetobacter baumannii
24	ACBA002.0321.00040.C001	integron_01	CALIN	3	4	GCF_001806485.1	Acinetobacter baumannii
25	ACBA002.0321.00041.C001	integron_01	CALIN	3	4	GCF_001887305.1	Acinetobacter baumannii
26	ACBA002.0321.00042.C001	integron_01	complete	1	3	GCF_001895125.2	Acinetobacter baumannii
27	ACBA002.0321.00043.C001	integron_01	CALIN	3	4	GCF_001895985.1	Acinetobacter baumannii
28	ACBA002.0321.00045.C001	integron_01	CALIN	3	4	GCF_001902375.1	Acinetobacter baumannii
29	ACBA002.0321.00047.C001	integron_01	CALIN	3	4	GCF_001922205.1	Acinetobacter baumannii
30	ACBA002.0321.00048.C001	integron_01	CALIN	3	4	GCF_001922225.1	Acinetobacter baumannii
31	ACBA002.0321.00049.C001	integron_01	CALIN	3	4	GCF_001922245.1	Acinetobacter baumannii
32	ACBA002.0321.00051.C001	integron_01	CALIN	3	4	GCF_002082625.2	Acinetobacter baumannii
33	ACBA002.0321.00053.C001	integron_01	CALIN	3	4	GCF_002082685.1	Acinetobacter baumannii
34	ACBA002.0321.00054.C001	integron_01	CALIN	3	4	GCF_002082705.1	Acinetobacter baumannii
35	ACBA002.0321.00055.C001	integron_01	CALIN	3	4	GCF_002082725.1	Acinetobacter baumannii
36	ACBA002.0321.00056.C001	integron_01	CALIN	3	4	GCF_002082745.1	Acinetobacter baumannii
37	ACBA002.0321.00057.P002	integron_01	CALIN	2	3	GCF_002082785.1	Acinetobacter baumannii
38	ACBA002.0321.00060.C001	integron_01	CALIN	3	4	GCF_002082845.1	Acinetobacter baumannii
39	ACBA002.0321.00061.C001	integron_01	CALIN	3	4	GCF_002082865.1	Acinetobacter baumannii
40	ACBA002.0321.00062.C001	integron_01	CALIN	3	4	GCF_002082885.1	Acinetobacter baumannii
41	ACBA002.0321.00064.C001	integron_01	complete	3	5	GCF_002210065.1	Acinetobacter baumannii
42	ACBA002.0321.00066.C001	integron_01	complete	4	6	GCF_002741415.1	Acinetobacter baumannii
43	ACBA002.0321.00067.C001	integron_01	CALIN	2	2	GCF_002753915.1	Acinetobacter baumannii
44	ACBA002.0321.00068.C001	integron_01	complete	4	6	GCF_002761575.1	Acinetobacter baumannii
45	ACBA002.0321.00069.C001	integron_01	complete	4	6	GCF_002762095.1	Acinetobacter baumannii
46	ACBA002.0321.00070.C001	integron_01	complete	4	6	GCF_002762115.1	Acinetobacter baumannii
47	ACBA002.0321.00071.C001	integron_01	complete	4	6	GCF_002762155.1	Acinetobacter baumannii
48	ACBA002.0321.00072.C001	integron_01	CALIN	3	4	GCF_002843665.1	Acinetobacter baumannii
49	ACBA002.0321.00072.C001	integron_02	complete	4	6	GCF_002843665.1	Acinetobacter baumannii
50	ACBA002.0321.00076.C001	integron_01	complete	2	4	GCF_002948925.1	Acinetobacter baumannii
51	ACBA002.0321.00077.C001	integron_01	complete	4	6	GCF_002950495.2	Acinetobacter baumannii
52	ACBA002.0321.00078.C001	integron_01	CALIN	3	4	GCF_002996805.1	Acinetobacter baumannii
53	ACBA002.0321.00078.C001	integron_02	complete	3	5	GCF_002996805.1	Acinetobacter baumannii
54	ACBA002.0321.00078.C001	integron_03	CALIN	2	3	GCF_002996805.1	Acinetobacter baumannii
55	ACBA002.0321.00078.C001	integron_04	CALIN	3	4	GCF_002996805.1	Acinetobacter baumannii
56	ACBA002.0321.00079.C001	integron_01	complete	3	5	GCF_002999195.2	Acinetobacter baumannii
57	ACBA002.0321.00081.C001	integron_01	CALIN	3	4	GCF_003010655.1	Acinetobacter baumannii
58	ACBA002.0321.00086.C001	integron_01	CALIN	3	4	GCF_003264275.1	Acinetobacter baumannii
59	ACBA002.0321.00089.C001	integron_01	complete	3	5	GCF_003296225.1	Acinetobacter baumannii
60	ACBA002.0321.00092.P005	integron_01	CALIN	2	2	GCF_003431865.1	Acinetobacter baumannii
61	ACBA002.0321.00093.C001	integron_01	CALIN	3	4	GCF_003516005.1	Acinetobacter baumannii
62	ACBA002.0321.00094.C001	integron_01	CALIN	4	6	GCF_003522665.1	Acinetobacter baumannii
63	ACBA002.0321.00096.C001	integron_01	CALIN	3	4	GCF_003522785.1	Acinetobacter baumannii
64	ACBA002.0321.00098.C001	integron_01	CALIN	3	4	GCF_003522885.1	Acinetobacter baumannii
65	ACBA002.0321.00099.P005	integron_01	CALIN	2	2	GCF_003547115.1	Acinetobacter baumannii
66	ACBA002.0321.00102.P003	integron_01	CALIN	2	3	GCF_003812385.1	Acinetobacter baumannii
67	ACBA002.0321.00103.C001	integron_01	CALIN	3	4	GCF_003812485.1	Acinetobacter baumannii
68	ACBA002.0321.00103.C001	integron_02	CALIN	3	4	GCF_003812485.1	Acinetobacter baumannii
69	ACBA002.0321.00103.C001	integron_03	CALIN	3	4	GCF_003812485.1	Acinetobacter baumannii
70	ACBA002.0321.00104.C001	integron_01	CALIN	3	4	GCF_003931755.1	Acinetobacter baumannii
71	ACBA002.0321.00105.C001	integron_01	CALIN	3	4	GCF_003931775.1	Acinetobacter baumannii
72	ACBA002.0321.00107.C001	integron_01	CALIN	3	4	GCF_003948455.2	Acinetobacter baumannii
73	ACBA002.0321.00113.C001	integron_01	CALIN	3	4	GCF_004101685.1	Acinetobacter baumannii
74	ACBA002.0321.00114.C001	integron_01	CALIN	3	4	GCF_004101705.1	Acinetobacter baumannii
75	ACBA002.0321.00115.C001	integron_01	CALIN	3	4	GCF_004101725.1	Acinetobacter baumannii
76	ACBA002.0321.00116.C001	integron_01	CALIN	3	4	GCF_004101745.1	Acinetobacter baumannii
77	ACBA002.0321.00117.C001	integron_01	CALIN	2	2	GCF_004136355.1	Acinetobacter baumannii
78	ACBA002.0321.00122.P006	integron_01	CALIN	3	1	GCF_004768705.1	Acinetobacter baumannii
79	ACBA002.0321.00124.P002	integron_01	CALIN	2	3	GCF_005280435.1	Acinetobacter baumannii
80	ACBA002.0321.00126.C001	integron_01	CALIN	3	4	GCF_005280695.1	Acinetobacter baumannii
81	ACBA002.0321.00127.C001	integron_01	CALIN	3	4	GCF_005280715.1	Acinetobacter baumannii
82	ACBA002.0321.00127.C001	integron_02	CALIN	2	3	GCF_005280715.1	Acinetobacter baumannii
83	ACBA002.0321.00128.P002	integron_01	CALIN	2	3	GCF_005518095.1	Acinetobacter baumannii
84	ACBA002.0321.00130.C001	integron_01	complete	3	5	GCF_006385075.1	Acinetobacter baumannii
85	ACBA002.0321.00132.C001	integron_01	complete	4	6	GCF_007221455.1	Acinetobacter baumannii
86	ACBA002.0321.00136.C001	integron_01	CALIN	3	4	GCF_008244865.1	Acinetobacter baumannii
87	ACBA002.0321.00137.C001	integron_01	CALIN	3	4	GCF_008244885.1	Acinetobacter baumannii
88	ACBA002.0321.00138.C001	integron_01	CALIN	3	4	GCF_008244905.1	Acinetobacter baumannii
89	ACBA002.0321.00143.P002	integron_01	complete	4	6	GCF_008931365.1	Acinetobacter baumannii
90	ACBA002.0321.00145.C001	integron_01	CALIN	3	4	GCF_009455505.1	Acinetobacter baumannii
91	ACBA002.0321.00151.C001	integron_01	CALIN	3	4	GCF_011067065.1	Acinetobacter baumannii
92	ACBA002.0321.00152.C001	integron_01	CALIN	3	3	GCF_012272715.1	Acinetobacter baumannii
93	ACBA002.0321.00153.C001	integron_01	CALIN	3	4	GCF_012272735.1	Acinetobacter baumannii
94	ACBA002.0321.00153.C001	integron_02	complete	4	6	GCF_012272735.1	Acinetobacter baumannii
95	ACBA002.0321.00154.C001	integron_01	CALIN	3	4	GCF_012272755.1	Acinetobacter baumannii
96	ACBA002.0321.00154.C001	integron_02	complete	4	6	GCF_012272755.1	Acinetobacter baumannii
97	ACBA002.0321.00155.C001	integron_01	CALIN	3	4	GCF_012272775.1	Acinetobacter baumannii
98	ACBA002.0321.00156.C001	integron_01	CALIN	3	4	GCF_012272795.1	Acinetobacter baumannii
99	ACBA002.0321.00156.C001	integron_02	complete	4	6	GCF_012272795.1	Acinetobacter baumannii
100	ACBA002.0321.00158.P002	integron_01	complete	1	2	GCF_012931625.1	Acinetobacter baumannii
101	ACBA002.0321.00159.P002	integron_01	complete	1	2	GCF_012931645.1	Acinetobacter baumannii
102	ACBA002.0321.00161.P002	integron_01	CALIN	2	3	GCF_012934905.1	Acinetobacter baumannii
103	ACBA002.0321.00170.P002	integron_01	CALIN	2	3	GCF_012935085.1	Acinetobacter baumannii
104	ACBA002.0321.00171.P002	integron_01	CALIN	2	3	GCF_012935105.1	Acinetobacter baumannii
105	ACBA002.0321.00172.P002	integron_01	CALIN	2	3	GCF_012935125.1	Acinetobacter baumannii
106	ACBA002.0321.00176.C001	integron_01	CALIN	2	4	GCF_012974585.1	Acinetobacter baumannii
107	ACBA002.0321.00177.C001	integron_01	CALIN	2	2	GCF_012974845.1	Acinetobacter baumannii
108	ACBA002.0321.00178.C001	integron_01	CALIN	3	4	GCF_013305465.1	Acinetobacter baumannii
109	ACBA002.0321.00179.C001	integron_01	CALIN	3	4	GCF_013376855.2	Acinetobacter baumannii
110	ACBA002.0321.00183.P002	integron_01	CALIN	3	4	GCF_013416255.1	Acinetobacter baumannii
111	ACBA002.0321.00183.P002	integron_02	CALIN	2	3	GCF_013416255.1	Acinetobacter baumannii
112	ACBA002.0321.00194.C001	integron_01	complete	4	6	GCF_014705785.1	Acinetobacter baumannii
113	ACBA002.0321.00195.C001	integron_01	complete	4	6	GCF_014705805.1	Acinetobacter baumannii
114	ACBA002.0321.00196.C001	integron_01	complete	2	4	GCF_014705825.1	Acinetobacter baumannii
115	ACBA002.0321.00196.C001	integron_02	complete	1	3	GCF_014705825.1	Acinetobacter baumannii
116	ACBA002.0321.00197.C001	integron_01	complete	4	6	GCF_014705845.1	Acinetobacter baumannii
117	ACBA002.0321.00198.C001	integron_01	complete	4	6	GCF_014705865.1	Acinetobacter baumannii
118	ACBA002.0321.00199.C001	integron_01	complete	4	6	GCF_014705885.1	Acinetobacter baumannii
119	ACBA002.0321.00202.C001	integron_01	CALIN	3	4	GCF_015732435.1	Acinetobacter baumannii
120	ACBA002.0321.00203.C001	integron_01	CALIN	3	4	GCF_015870765.1	Acinetobacter baumannii
121	ACBA002.0321.00204.C001	integron_01	CALIN	3	4	GCF_015870965.1	Acinetobacter baumannii
122	ACBA002.0321.00206.C001	integron_01	complete	3	5	GCF_016127515.1	Acinetobacter baumannii
123	ACBA002.0321.00207.C001	integron_01	CALIN	3	4	GCF_016350005.1	Acinetobacter baumannii
124	ACBA002.0321.00208.C001	integron_01	CALIN	3	4	GCF_016350065.1	Acinetobacter baumannii
125	ACBA002.0321.00209.C001	integron_01	CALIN	3	4	GCF_016350085.1	Acinetobacter baumannii
126	ACBA002.0321.00210.C001	integron_01	CALIN	3	4	GCF_016350105.1	Acinetobacter baumannii
127	ACBA002.0321.00216.C001	integron_01	CALIN	2	2	GCF_016903135.1	Acinetobacter baumannii
128	ACBA002.0321.00217.C001	integron_01	CALIN	3	4	GCF_016903215.1	Acinetobacter baumannii
129	ACBA002.0321.00218.P002	integron_01	CALIN	3	4	GCF_016919505.1	Acinetobacter baumannii
130	ACBA002.0321.00218.P002	integron_02	complete	2	4	GCF_016919505.1	Acinetobacter baumannii
131	ACBA002.0321.00222.C001	integron_01	CALIN	3	4	GCF_017096385.1	Acinetobacter baumannii
132	ACBA002.0321.00224.C001	integron_01	CALIN	3	4	GCF_017096425.1	Acinetobacter baumannii
133	ACBA002.0321.00226.C001	integron_01	CALIN	3	4	GCF_017098205.1	Acinetobacter baumannii
134	ACBA002.0321.00226.C001	integron_02	complete	4	6	GCF_017098205.1	Acinetobacter baumannii
135	ACBA002.0321.00227.C001	integron_01	CALIN	3	4	GCF_017098225.1	Acinetobacter baumannii
136	ACBA002.0321.00230.C001	integron_01	complete	4	6	GCF_900088705.1	Acinetobacter baumannii
137	ACBA002.0321.00232.C001	integron_01	complete	3	5	GCF_900478145.1	Acinetobacter baumannii
138	ACBA002.0321.00235.C001	integron_01	complete	3	5	GCF_000018445.1	Acinetobacter baumannii ACICU
139	ACBA002.0321.00236.C001	integron_01	complete	3	5	GCF_005519135.1	Acinetobacter baumannii ACICU
140	ACBA002.0321.00237.C001	integron_01	complete	3	5	GCF_000021245.2	Acinetobacter baumannii AB0057
141	ACBA002.0321.00238.C001	integron_01	complete	4	6	GCF_000226275.2	Acinetobacter baumannii MDR-ZJ06
142	ACBA002.0321.00238.C001	integron_02	CALIN	3	4	GCF_000226275.2	Acinetobacter baumannii MDR-ZJ06
143	ACBA002.0321.00239.C001	integron_01	complete	4	6	GCF_000069245.1	Acinetobacter baumannii AYE
144	ACBA002.0321.00239.C001	integron_02	CALIN	4	6	GCF_000069245.1	Acinetobacter baumannii AYE
145	ACBA002.0321.00239.C001	integron_03	In0		1	GCF_000069245.1	Acinetobacter baumannii AYE
146	ACBA002.0321.00241.C001	integron_01	CALIN	2	2	GCF_000188215.1	Acinetobacter baumannii 1656-2
147	ACBA002.0321.00242.C001	integron_01	CALIN	3	4	GCF_000187205.2	Acinetobacter baumannii MDR-TJ
148	ACBA002.0321.00242.C001	integron_02	CALIN	5	6	GCF_000187205.2	Acinetobacter baumannii MDR-TJ
149	ACBA002.0321.00244.P003	integron_01	CALIN	3	4	GCF_000419385.1	Acinetobacter baumannii BJAB07104
150	ACBA002.0321.00246.P003	integron_01	CALIN	3	4	GCF_000419425.1	Acinetobacter baumannii BJAB0868
151	ACBA002.0321.00247.C001	integron_01	CALIN	3	4	GCF_000302575.1	Acinetobacter baumannii TYTH-1
152	ACBA002.0321.00248.C001	integron_01	CALIN	3	4	GCF_000498375.2	Acinetobacter baumannii DU202
153	ACBA002.0321.00250.C001	integron_01	CALIN	3	4	GCF_000828795.1	Acinetobacter baumannii NCGM 237
154	ACDE002.0321.00001.P002	integron_01	complete	2	4	GCF_001704615.3	Acinetobacter defluvii
155	ACDE003.0321.00002.C001	integron_01	CALIN	2	3	GCF_002205315.1	Achromobacter denitrificans
156	ACEB001.0321.00001.C001	integron_01	complete	2	3	GCF_000022305.1	Acidovorax ebreus TPSY
157	ACEB001.0321.00001.C001	integron_02	CALIN	5	5	GCF_000022305.1	Acidovorax ebreus TPSY
158	ACFE001.0321.00001.C001	integron_01	complete	5	7	GCF_003966655.1	Acidithiobacillus ferridurans
159	ACFE001.0321.00001.C001	integron_02	CALIN	2	3	GCF_003966655.1	Acidithiobacillus ferridurans
160	ACFE002.0321.00001.C001	integron_01	CALIN	4	5	GCF_016250455.1	Acidithiobacillus ferrivorans
161	ACFE002.0321.00002.C001	integron_01	CALIN	2	7	GCF_000214095.2	Acidithiobacillus ferrivorans SS3
162	ACFE002.0321.00002.C001	integron_02	CALIN	2	3	GCF_000214095.2	Acidithiobacillus ferrivorans SS3
163	ACFE005.0321.00001.C001	integron_01	CALIN	5	7	GCF_013462805.1	Acidithiobacillus ferrooxidans
164	ACFE005.0321.00002.C001	integron_01	CALIN	5	9	GCF_000021485.1	Acidithiobacillus ferrooxidans ATCC 23270
165	ACFE005.0321.00003.C001	integron_01	CALIN	5	7	GCF_000020825.1	Acidithiobacillus ferrooxidans ATCC 53993
166	ACHA001.0321.00005.P002	integron_01	CALIN	2	2	GCF_004379355.1	Acinetobacter haemolyticus
167	ACHA001.0321.00012.C001	integron_01	CALIN	5	4	GCF_009892365.1	Acinetobacter haemolyticus
168	ACHA001.0321.00013.C001	integron_01	CALIN	5	4	GCF_009892385.1	Acinetobacter haemolyticus
169	ACIN004.0321.00004.P002	integron_01	CALIN	3	4	GCF_009914375.1	Acinetobacter indicus
170	ACIN004.0321.00005.P003	integron_01	CALIN	3	4	GCF_009914395.1	Acinetobacter indicus
171	ACIN004.0321.00009.P002	integron_01	CALIN	5	5	GCF_010917815.1	Acinetobacter indicus
172	ACIN004.0321.00010.P002	integron_01	CALIN	5	4	GCF_010918195.1	Acinetobacter indicus
173	ACIN004.0321.00011.P003	integron_01	CALIN	4	5	GCF_010918375.1	Acinetobacter indicus
174	ACIN004.0321.00015.P002	integron_01	CALIN	3	3	GCF_015217905.1	Acinetobacter indicus
175	ACIN004.0321.00017.C001	integron_01	complete	3	5	GCF_017132735.1	Acinetobacter indicus
176	ACJO001.0321.00011.P002	integron_01	complete	2	4	GCF_001484935.1	Acinetobacter johnsonii XBB1
177	ACJU001.0321.00001.C001	integron_01	CALIN	2	3	GCF_001941805.1	Acinetobacter junii
178	ACMO001.0321.00001.C001	integron_01	complete	3	7	GCF_014489595.1	Acidovorax monticola
179	ACPI001.0321.00001.P011	integron_01	CALIN	2	2	GCF_015218165.1	Acinetobacter piscicola
180	ACPI002.0321.00011.P002	integron_01	complete	4	6	GCF_007954485.1	Acinetobacter pittii
181	ACPR001.0321.00001.C001	integron_01	complete	3	5	GCF_001753245.1	Acidihalobacter prosperus
182	ACPR001.0321.00001.C001	integron_02	CALIN	6	6	GCF_001753245.1	Acidihalobacter prosperus
183	ACPR001.0321.00001.C001	integron_03	CALIN	2	2	GCF_001753245.1	Acidihalobacter prosperus
184	ACPR001.0321.00001.C001	integron_04	CALIN	2	3	GCF_001753245.1	Acidihalobacter prosperus
185	ACSC001.0321.00006.P002	integron_01	CALIN	5	5	GCF_010919095.1	Acinetobacter schindleri
186	ACSE001.0321.00003.P003	integron_01	CALIN	2	3	GCF_014719215.1	Acinetobacter seifertii
187	ACSE001.0321.00004.P006	integron_01	CALIN	2	3	GCF_014719435.1	Acinetobacter seifertii
188	ACSE001.0321.00007.P005	integron_01	CALIN	2	3	GCF_014720495.1	Acinetobacter seifertii
189	ACSE001.0321.00008.P006	integron_01	CALIN	2	3	GCF_014720855.1	Acinetobacter seifertii
190	ACSE001.0321.00015.P004	integron_01	CALIN	2	3	GCF_014722775.1	Acinetobacter seifertii
191	ACSE001.0321.00017.P003	integron_01	CALIN	2	3	GCF_014723055.1	Acinetobacter seifertii
192	ACSE001.0321.00019.P003	integron_01	CALIN	2	3	GCF_014723135.1	Acinetobacter seifertii
193	ACSE001.0321.00021.P004	integron_01	CALIN	2	3	GCF_014723195.1	Acinetobacter seifertii
194	ACSP010.0321.00001.P004	integron_01	CALIN	3	9	GCF_002934965.1	Acinetobacter sp. ACNIH2
195	ACSP014.0321.00001.C001	integron_01	complete	2	4	GCF_001714725.1	Acidovorax sp. RAC01
196	ACSP016.0321.00001.C001	integron_01	CALIN	3	3	GCF_002176815.1	Acidovorax sp. T1
197	ACSP016.0321.00001.C001	integron_02	complete	8	8	GCF_002176815.1	Acidovorax sp. T1
198	ACSP019.0321.00001.P002	integron_01	complete	2	4	GCF_002165305.2	Acinetobacter sp. WCHA55
199	ACSP030.0321.00001.C001	integron_01	complete	5	9	GCF_000015545.1	Acidovorax sp. JS42
200	ACSP030.0321.00001.C001	integron_02	CALIN	8	11	GCF_000015545.1	Acidovorax sp. JS42
201	ACSP031.0321.00001.C001	integron_01	complete	1	3	GCF_003812245.1	Acinetobacter sp. FDAARGOS_493
202	ACSP032.0321.00001.C001	integron_01	CALIN	2	2	GCF_003812225.1	Acinetobacter sp. FDAARGOS_494
203	ACSP033.0321.00001.C001	integron_01	complete	4	6	GCF_003812205.1	Acinetobacter sp. FDAARGOS_560
204	ACSP034.0321.00001.C001	integron_01	CALIN	4	2	GCF_003669015.1	Acidovorax sp. 1608163
205	ACSP034.0321.00001.C001	integron_02	CALIN	2	1	GCF_003669015.1	Acidovorax sp. 1608163
206	ACSP034.0321.00001.C001	integron_03	complete	1	3	GCF_003669015.1	Acidovorax sp. 1608163
207	ACSP034.0321.00001.C001	integron_04	CALIN	2	4	GCF_003669015.1	Acidovorax sp. 1608163
208	ACSP040.0321.00001.C001	integron_01	complete	5	6	GCF_008926505.1	Acidithiobacillus sp. 'AMD consortium'
209	ACSP040.0321.00001.C001	integron_02	CALIN	2	3	GCF_008926505.1	Acidithiobacillus sp. 'AMD consortium'
210	ACSP044.0321.00001.C001	integron_01	complete	24	30	GCF_011303755.1	Acidovorax sp. HDW3
211	ACTO001.0321.00001.C001	integron_01	CALIN	5	6	GCF_009676805.1	Acinetobacter towneri
212	ACTO001.0321.00001.C001	integron_02	CALIN	2	3	GCF_009676805.1	Acinetobacter towneri
213	ACTO001.0321.00002.C001	integron_01	CALIN	3	5	GCF_012220585.1	Acinetobacter towneri
214	ACTO001.0321.00002.P002	integron_01	CALIN	3	4	GCF_012220585.1	Acinetobacter towneri
215	ACVA001.0321.00001.P003	integron_01	CALIN	3	3	GCF_016607565.1	Acinetobacter variabilis
216	ACWU001.0321.00001.P002	integron_01	CALIN	2	2	GCF_001696605.3	Acinetobacter wuhouensis
217	ACWU001.0321.00002.P003	integron_01	complete	3	5	GCF_002165345.2	Acinetobacter wuhouensis
218	ACXY001.0321.00008.C001	integron_01	CALIN	2	3	GCF_013282235.1	Achromobacter xylosoxidans
219	ACXY001.0321.00015.C001	integron_01	complete	2	4	GCF_900009125.1	Achromobacter xylosoxidans
220	ACXY001.0321.00016.C001	integron_01	complete	2	4	GCF_900010105.1	Achromobacter xylosoxidans
221	ACXY001.0321.00016.C001	integron_02	In0		1	GCF_900010105.1	Achromobacter xylosoxidans
222	ADRA001.0321.00001.C001	integron_01	In0		1	GCF_014075995.1	Adhaeribacter radiodurans
223	AECA002.0321.00002.C001	integron_01	complete	3	5	GCF_003294855.2	Aeromonas caviae
224	AECA002.0321.00002.C001	integron_02	In0		1	GCF_003294855.2	Aeromonas caviae
225	AECA002.0321.00003.P002	integron_01	complete	3	6	GCF_003925855.2	Aeromonas caviae
226	AECA002.0321.00004.C001	integron_01	complete	3	7	GCF_007179295.1	Aeromonas caviae
227	AECA002.0321.00004.C001	integron_02	complete	3	6	GCF_007179295.1	Aeromonas caviae
228	AECA002.0321.00005.C001	integron_01	complete	1	3	GCF_013487965.1	Aeromonas caviae
229	AECA002.0321.00005.C001	integron_02	complete	2	4	GCF_013487965.1	Aeromonas caviae
230	AECA002.0321.00006.C001	integron_01	complete	3	6	GCF_013487985.1	Aeromonas caviae
231	AECA002.0321.00007.C001	integron_01	complete	1	3	GCF_013488005.1	Aeromonas caviae
232	AECA002.0321.00007.C001	integron_02	CALIN	4	5	GCF_013488005.1	Aeromonas caviae
233	AECA002.0321.00008.C001	integron_01	complete	4	6	GCF_014158455.1	Aeromonas caviae
234	AECA002.0321.00008.C001	integron_02	CALIN	4	6	GCF_014158455.1	Aeromonas caviae
235	AECA002.0321.00010.C001	integron_01	In0		1	GCF_014168635.1	Aeromonas caviae
236	AECA002.0321.00010.C001	integron_02	CALIN	4	5	GCF_014168635.1	Aeromonas caviae
237	AECA002.0321.00011.C001	integron_01	complete	1	3	GCF_014169235.1	Aeromonas caviae
238	AECA002.0321.00011.C001	integron_02	complete	2	6	GCF_014169235.1	Aeromonas caviae
239	AECA002.0321.00012.P002	integron_01	complete	3	6	GCF_014169675.1	Aeromonas caviae
240	AECA002.0321.00016.P002	integron_01	complete	3	5	GCF_016598815.1	Aeromonas caviae
241	AECA002.0321.00017.P002	integron_01	complete	3	5	GCF_016728865.1	Aeromonas caviae
242	AECA002.0321.00018.C001	integron_01	complete	6	8	GCF_016861425.1	Aeromonas caviae
243	AECA002.0321.00018.C001	integron_02	complete	6	9	GCF_016861425.1	Aeromonas caviae
244	AECA002.0321.00018.P003	integron_01	complete	5	7	GCF_016861425.1	Aeromonas caviae
245	AEHY001.0321.00001.C001	integron_01	CALIN	2	3	GCF_000940915.1	Aeromonas hydrophila
246	AEHY001.0321.00006.P002	integron_01	complete	4	7	GCF_001687125.1	Aeromonas hydrophila
247	AEHY001.0321.00006.P002	integron_02	complete	2	4	GCF_001687125.1	Aeromonas hydrophila
248	AEHY001.0321.00007.C001	integron_01	complete	1	3	GCF_001895965.1	Aeromonas hydrophila
249	AEHY001.0321.00007.C001	integron_02	complete	3	5	GCF_001895965.1	Aeromonas hydrophila
250	AEHY001.0321.00007.C001	integron_03	CALIN	3	5	GCF_001895965.1	Aeromonas hydrophila
251	AEHY001.0321.00010.C001	integron_01	complete	2	4	GCF_003491245.1	Aeromonas hydrophila
252	AEHY001.0321.00010.C001	integron_02	complete	3	6	GCF_003491245.1	Aeromonas hydrophila
253	AEHY001.0321.00012.C001	integron_01	CALIN	2	3	GCF_004684305.1	Aeromonas hydrophila
254	AEHY001.0321.00012.P002	integron_01	complete	4	9	GCF_004684305.1	Aeromonas hydrophila
255	AEHY001.0321.00013.C001	integron_01	CALIN	2	3	GCF_004684325.1	Aeromonas hydrophila
256	AEHY001.0321.00013.P002	integron_01	complete	4	9	GCF_004684325.1	Aeromonas hydrophila
257	AEHY001.0321.00017.C001	integron_01	CALIN	3	5	GCF_014161955.1	Aeromonas hydrophila
258	AEHY001.0321.00019.P003	integron_01	complete	5	7	GCF_014679585.1	Aeromonas hydrophila
259	AEHY001.0321.00019.P004	integron_01	complete	1	3	GCF_014679585.1	Aeromonas hydrophila
260	AEHY001.0321.00022.C001	integron_01	complete	1	3	GCF_002850695.3	Aeromonas hydrophila subsp. hydrophila
261	AEHY001.0321.00022.P002	integron_01	complete	7	9	GCF_002850695.3	Aeromonas hydrophila subsp. hydrophila
262	AEHY001.0321.00022.P004	integron_01	complete	1	3	GCF_002850695.3	Aeromonas hydrophila subsp. hydrophila
263	AEME001.0321.00003.C001	integron_01	complete	3	5	GCF_013085725.1	Aeromonas media
264	AEME001.0321.00003.C001	integron_02	complete	1	3	GCF_013085725.1	Aeromonas media
265	AEME001.0321.00006.P002	integron_01	complete	4	6	GCF_013085785.1	Aeromonas media
266	AEMU001.0321.00001.C001	integron_01	CALIN	2	4	GCF_007748035.1	Aeoliella mucimassa
267	AESA002.0321.00002.P002	integron_01	complete	7	16	GCF_002214245.1	Aeromonas salmonicida
268	AESA002.0321.00002.P002	integron_02	In0		1	GCF_002214245.1	Aeromonas salmonicida
269	AESA002.0321.00004.P002	integron_01	complete	1	3	GCF_002214305.1	Aeromonas salmonicida
270	AESA002.0321.00004.P002	integron_02	CALIN	2	4	GCF_002214305.1	Aeromonas salmonicida
271	AESA002.0321.00004.P002	integron_03	complete	4	6	GCF_002214305.1	Aeromonas salmonicida
272	AESA002.0321.00005.C001	integron_01	CALIN	6	10	GCF_002764135.1	Aeromonas salmonicida
273	AESA002.0321.00005.C001	integron_02	CALIN	3	3	GCF_002764135.1	Aeromonas salmonicida
274	AESA002.0321.00008.P002	integron_01	CALIN	2	3	GCF_008370735.1	Aeromonas salmonicida subsp. salmonicida
275	AESA002.0321.00008.P002	integron_02	In0		1	GCF_008370735.1	Aeromonas salmonicida subsp. salmonicida
276	AESA002.0321.00013.P002	integron_01	In0		1	GCF_000196395.1	Aeromonas salmonicida subsp. salmonicida A449
277	AESP001.0321.00001.C001	integron_01	complete	1	3	GCF_002934285.1	Aeromonas sp. ASNIH1
278	AESP001.0321.00001.P002	integron_01	CALIN	3	4	GCF_002934285.1	Aeromonas sp. ASNIH1
279	AESP001.0321.00001.P002	integron_02	complete	1	4	GCF_002934285.1	Aeromonas sp. ASNIH1
280	AESP003.0321.00001.C001	integron_01	CALIN	3	4	GCF_002903405.1	Aeromonas sp. ASNIH3
281	AESP003.0321.00001.C001	integron_02	CALIN	2	3	GCF_002903405.1	Aeromonas sp. ASNIH3
282	AESP003.0321.00001.C001	integron_03	complete	3	5	GCF_002903405.1	Aeromonas sp. ASNIH3
283	AESP003.0321.00001.P002	integron_01	complete	4	7	GCF_002903405.1	Aeromonas sp. ASNIH3
284	AESP004.0321.00001.C001	integron_01	complete	5	8	GCF_002934425.1	Aeromonas sp. ASNIH4
285	AESP004.0321.00001.C001	integron_02	CALIN	2	4	GCF_002934425.1	Aeromonas sp. ASNIH4
286	AESP004.0321.00001.P002	integron_01	complete	3	5	GCF_002934425.1	Aeromonas sp. ASNIH4
287	AESP005.0321.00001.C001	integron_01	complete	3	5	GCF_002902865.1	Aeromonas sp. ASNIH5
288	AESP005.0321.00001.C001	integron_02	complete	2	4	GCF_002902865.1	Aeromonas sp. ASNIH5
289	AESP005.0321.00001.P002	integron_01	complete	1	3	GCF_002902865.1	Aeromonas sp. ASNIH5
290	AESP006.0321.00001.C001	integron_01	complete	1	3	GCF_002903485.1	Aeromonas sp. ASNIH7
291	AESP006.0321.00001.C001	integron_02	CALIN	2	3	GCF_002903485.1	Aeromonas sp. ASNIH7
292	AESP006.0321.00001.P002	integron_01	complete	1	3	GCF_002903485.1	Aeromonas sp. ASNIH7
293	AEVE001.0321.00002.P002	integron_01	complete	3	5	GCF_001634325.1	Aeromonas veronii
294	AEVE001.0321.00002.P002	integron_02	complete	1	2	GCF_001634325.1	Aeromonas veronii
295	AEVE001.0321.00002.P002	integron_03	complete	1	3	GCF_001634325.1	Aeromonas veronii
296	AEVE001.0321.00003.C001	integron_01	CALIN	2	2	GCF_002803925.1	Aeromonas veronii
297	AEVE001.0321.00005.C001	integron_01	complete	2	4	GCF_003491365.1	Aeromonas veronii
298	AEVE001.0321.00006.C001	integron_01	complete	3	5	GCF_003722175.1	Aeromonas veronii
299	AEVE001.0321.00008.C001	integron_01	complete	4	8	GCF_009755745.1	Aeromonas veronii
300	AEVE001.0321.00012.C001	integron_01	CALIN	2	3	GCF_014168715.1	Aeromonas veronii
301	AEVE001.0321.00012.P003	integron_01	complete	4	7	GCF_014168715.1	Aeromonas veronii
302	AEVE001.0321.00015.C001	integron_01	CALIN	3	4	GCF_014169835.1	Aeromonas veronii
303	AEVE001.0321.00015.P002	integron_01	complete	3	6	GCF_014169835.1	Aeromonas veronii
304	AEVE001.0321.00016.C001	integron_01	CALIN	4	5	GCF_014169875.1	Aeromonas veronii
305	AGFA001.0321.00005.P005	integron_01	complete	5	7	GCF_016599595.1	Agrobacterium fabrum
306	AGFA001.0321.00006.P004	integron_01	complete	2	3	GCF_016599615.1	Agrobacterium fabrum
307	AGFA001.0321.00007.P004	integron_01	complete	2	3	GCF_016864515.1	Agrobacterium fabrum
308	AGFA001.0321.00007.P004	integron_02	complete	2	3	GCF_016864515.1	Agrobacterium fabrum
309	AGGI001.0321.00001.C001	integron_01	complete	1	5	GCF_001420915.1	Agarivorans gilvus
310	AGRH001.0321.00001.C001	integron_01	CALIN	2	3	GCF_002157225.2	Agarilytica rhodophyticola
311	AHAF001.0321.00001.C001	integron_01	CALIN	7	7	GCF_003015185.1	Ahniella affigens
312	AHAF001.0321.00001.C001	integron_02	CALIN	2	3	GCF_003015185.1	Ahniella affigens
313	AHAF001.0321.00001.C001	integron_03	CALIN	50	41	GCF_003015185.1	Ahniella affigens
314	ALAD001.0321.00001.C001	integron_01	CALIN	10	11	GCF_001562195.1	Alteromonas addita
315	ALAD001.0321.00001.C001	integron_02	complete	5	7	GCF_001562195.1	Alteromonas addita
316	ALAD001.0321.00001.C001	integron_03	CALIN	2	3	GCF_001562195.1	Alteromonas addita
317	ALAD001.0321.00001.C001	integron_04	CALIN	2	4	GCF_001562195.1	Alteromonas addita
318	ALAD001.0321.00001.C001	integron_05	CALIN	2	3	GCF_001562195.1	Alteromonas addita
319	ALAU001.0321.00001.C001	integron_01	complete	2	7	GCF_000730385.1	Alteromonas australica
320	ALAU001.0321.00001.C001	integron_02	CALIN	2	4	GCF_000730385.1	Alteromonas australica
321	ALAU001.0321.00001.C001	integron_03	CALIN	16	26	GCF_000730385.1	Alteromonas australica
322	ALAU001.0321.00001.C001	integron_04	CALIN	2	3	GCF_000730385.1	Alteromonas australica
323	ALAU001.0321.00001.C001	integron_05	CALIN	5	6	GCF_000730385.1	Alteromonas australica
324	ALAU001.0321.00002.C001	integron_01	complete	5	9	GCF_000934525.1	Alteromonas australica
325	ALBO001.0321.00001.C001	integron_01	CALIN	2	1	GCF_000009365.1	Alcanivorax borkumensis SK2
326	ALBO001.0321.00001.C001	integron_02	CALIN	2	3	GCF_000009365.1	Alcanivorax borkumensis SK2
327	ALDE001.0321.00002.C001	integron_01	complete	10	10	GCF_016592015.1	Alicycliphilus denitrificans
328	ALDE001.0321.00002.C001	integron_02	CALIN	7	5	GCF_016592015.1	Alicycliphilus denitrificans
329	ALDE001.0321.00004.C001	integron_01	complete	8	10	GCF_000204645.1	Alicycliphilus denitrificans K601
330	ALEH001.0321.00001.C001	integron_01	CALIN	3	6	GCF_000014785.1	Alkalilimnicola ehrlichii MLHE-1
331	ALEH001.0321.00001.C001	integron_02	complete	4	8	GCF_000014785.1	Alkalilimnicola ehrlichii MLHE-1
332	ALFA001.0321.00001.P002	integron_01	CALIN	6	5	GCF_013201705.1	Aliarcobacter faecis
333	ALFA001.0321.00001.P002	integron_02	CALIN	2	4	GCF_013201705.1	Aliarcobacter faecis
334	ALFA002.0321.00001.C001	integron_01	In0		1	GCF_000967305.2	Alcaligenes faecalis
335	ALFA002.0321.00001.P002	integron_01	In0		1	GCF_000967305.2	Alcaligenes faecalis
336	ALFA002.0321.00007.C001	integron_01	complete	3	5	GCF_004319585.1	Alcaligenes faecalis
337	ALFA002.0321.00008.C001	integron_01	complete	3	5	GCF_010092625.1	Alcaligenes faecalis
338	ALFA002.0321.00008.C001	integron_02	complete	2	4	GCF_010092625.1	Alcaligenes faecalis
339	ALFA002.0321.00008.P003	integron_01	CALIN	2	3	GCF_010092625.1	Alcaligenes faecalis
340	ALFI003.0321.00001.C002	integron_01	complete	30	32	GCF_000011805.1	Aliivibrio fischeri ES114
341	ALMA002.0321.00002.C001	integron_01	complete	6	15	GCF_001578515.1	Alteromonas macleodii
342	ALMA002.0321.00003.C001	integron_01	complete	3	10	GCF_002849875.1	Alteromonas macleodii
343	ALMA002.0321.00003.C001	integron_02	CALIN	9	14	GCF_002849875.1	Alteromonas macleodii
344	ALMA002.0321.00003.C001	integron_03	CALIN	2	2	GCF_002849875.1	Alteromonas macleodii
345	ALMA002.0321.00003.P002	integron_01	CALIN	6	6	GCF_002849875.1	Alteromonas macleodii
346	ALMA002.0321.00004.C001	integron_01	CALIN	4	4	GCF_000172635.2	Alteromonas macleodii ATCC 27126
347	ALMA002.0321.00005.C001	integron_01	complete	2	4	GCF_000299995.1	Alteromonas macleodii str. 'Black Sea 11'
348	ALMA002.0321.00005.C001	integron_02	CALIN	5	14	GCF_000299995.1	Alteromonas macleodii str. 'Black Sea 11'
349	ALMA002.0321.00006.C001	integron_01	complete	2	3	GCF_000300175.1	Alteromonas macleodii str. 'Balearic Sea AD45'
350	ALMA002.0321.00006.C001	integron_02	CALIN	6	8	GCF_000300175.1	Alteromonas macleodii str. 'Balearic Sea AD45'
351	ALMA002.0321.00007.C001	integron_01	CALIN	6	10	GCF_000299955.1	Alteromonas macleodii str. 'English Channel 673'
352	ALME003.0321.00001.C001	integron_01	CALIN	5	7	GCF_001562295.1	Alteromonas mediterranea
353	ALME003.0321.00001.C001	integron_02	CALIN	3	9	GCF_001562295.1	Alteromonas mediterranea
354	ALME003.0321.00002.C001	integron_01	CALIN	6	18	GCF_001562315.1	Alteromonas mediterranea
355	ALME003.0321.00003.C001	integron_01	complete	2	3	GCF_001886395.1	Alteromonas mediterranea
356	ALME003.0321.00003.C001	integron_02	CALIN	2	3	GCF_001886395.1	Alteromonas mediterranea
357	ALME003.0321.00004.C001	integron_01	complete	6	8	GCF_001886415.1	Alteromonas mediterranea
358	ALME003.0321.00004.C001	integron_02	CALIN	8	21	GCF_001886415.1	Alteromonas mediterranea
359	ALME003.0321.00005.C001	integron_01	CALIN	16	24	GCF_001886435.1	Alteromonas mediterranea
360	ALME003.0321.00005.C001	integron_02	complete	6	8	GCF_001886435.1	Alteromonas mediterranea
361	ALME003.0321.00005.C001	integron_03	CALIN	10	13	GCF_001886435.1	Alteromonas mediterranea
362	ALME003.0321.00006.C001	integron_01	complete	6	8	GCF_001886455.1	Alteromonas mediterranea
363	ALME003.0321.00006.C001	integron_02	CALIN	6	11	GCF_001886455.1	Alteromonas mediterranea
364	ALME003.0321.00007.C001	integron_01	complete	10	16	GCF_006517095.1	Alteromonas mediterranea
365	ALME003.0321.00007.C001	integron_02	CALIN	36	36	GCF_006517095.1	Alteromonas mediterranea
366	ALME003.0321.00011.C001	integron_01	complete	2	5	GCF_000439495.1	Alteromonas mediterranea MED64
367	ALME003.0321.00012.C001	integron_01	complete	3	6	GCF_000439535.1	Alteromonas mediterranea U7
368	ALME003.0321.00012.C001	integron_02	CALIN	3	3	GCF_000439535.1	Alteromonas mediterranea U7
369	ALME003.0321.00013.C001	integron_01	CALIN	6	16	GCF_000439575.1	Alteromonas mediterranea UM7
370	ALME003.0321.00014.C001	integron_01	CALIN	4	6	GCF_000439595.1	Alteromonas mediterranea UM4b
371	ALME003.0321.00014.C001	integron_02	CALIN	2	6	GCF_000439595.1	Alteromonas mediterranea UM4b
372	ALME003.0321.00015.C001	integron_01	complete	15	23	GCF_000020585.3	Alteromonas mediterranea DE
373	ALME003.0321.00015.C001	integron_02	CALIN	2	3	GCF_000020585.3	Alteromonas mediterranea DE
374	ALNA001.0321.00001.C001	integron_01	CALIN	19	22	GCF_000213655.1	Alteromonas naphthalenivorans
375	ALNA001.0321.00001.C001	integron_02	CALIN	2	3	GCF_000213655.1	Alteromonas naphthalenivorans
376	ALNA001.0321.00001.C001	integron_03	CALIN	2	3	GCF_000213655.1	Alteromonas naphthalenivorans
377	ALNA001.0321.00001.C001	integron_04	CALIN	4	6	GCF_000213655.1	Alteromonas naphthalenivorans
378	ALNA001.0321.00001.C001	integron_05	CALIN	3	3	GCF_000213655.1	Alteromonas naphthalenivorans
379	ALNA001.0321.00001.C001	integron_06	complete	11	12	GCF_000213655.1	Alteromonas naphthalenivorans
380	ALPE001.0321.00001.C001	integron_01	CALIN	4	4	GCF_002499975.2	Alteromonas pelagimontana
381	ALSA002.0321.00001.C001	integron_01	CALIN	2	2	GCF_003942025.1	Aliivibrio salmonicida
382	ALSA002.0321.00001.C001	integron_02	CALIN	4	9	GCF_003942025.1	Aliivibrio salmonicida
383	ALSA002.0321.00001.C002	integron_01	complete	17	25	GCF_003942025.1	Aliivibrio salmonicida
384	ALSA002.0321.00001.P003	integron_01	CALIN	4	3	GCF_003942025.1	Aliivibrio salmonicida
385	ALSA002.0321.00001.P003	integron_02	complete	4	6	GCF_003942025.1	Aliivibrio salmonicida
386	ALSA002.0321.00001.P003	integron_03	CALIN	4	4	GCF_003942025.1	Aliivibrio salmonicida
387	ALSA002.0321.00002.C001	integron_01	CALIN	2	2	GCF_000196495.1	Aliivibrio salmonicida LFI1238
388	ALSA002.0321.00002.C001	integron_02	CALIN	6	10	GCF_000196495.1	Aliivibrio salmonicida LFI1238
389	ALSA002.0321.00002.C002	integron_01	complete	17	24	GCF_000196495.1	Aliivibrio salmonicida LFI1238
390	ALSP001.0321.00001.C001	integron_01	complete	2	6	GCF_001010505.1	Alcanivorax sp. NBRC 101098
391	ALSP001.0321.00001.C001	integron_02	CALIN	4	4	GCF_001010505.1	Alcanivorax sp. NBRC 101098
392	ALSP001.0321.00001.C001	integron_03	In0		1	GCF_001010505.1	Alcanivorax sp. NBRC 101098
393	ALSP001.0321.00001.C001	integron_04	CALIN	5	13	GCF_001010505.1	Alcanivorax sp. NBRC 101098
394	ALSP003.0321.00001.C001	integron_01	complete	12	13	GCF_003443615.1	Alteromonas sp. BL110
395	ALSP003.0321.00001.C001	integron_02	CALIN	2	3	GCF_003443615.1	Alteromonas sp. BL110
396	ALSP003.0321.00001.C001	integron_03	CALIN	3	3	GCF_003443615.1	Alteromonas sp. BL110
397	ALSP004.0321.00001.C001	integron_01	CALIN	10	16	GCF_001562125.1	Alteromonas sp. Mac1
398	ALSP004.0321.00001.C001	integron_02	CALIN	5	7	GCF_001562125.1	Alteromonas sp. Mac1
399	ALSP004.0321.00001.C001	integron_03	CALIN	3	5	GCF_001562125.1	Alteromonas sp. Mac1
400	ALSP004.0321.00001.C001	integron_04	complete	4	8	GCF_001562125.1	Alteromonas sp. Mac1
401	ALSP004.0321.00001.C001	integron_05	CALIN	2	3	GCF_001562125.1	Alteromonas sp. Mac1
402	ALSP005.0321.00001.C001	integron_01	complete	9	17	GCF_001886475.1	Alteromonas sp. RW2A1
403	ALSP006.0321.00001.C001	integron_01	complete	2	3	GCF_002831605.1	Alteromonas sp. MB-3u-76
404	ALSP010.0321.00001.C001	integron_01	complete	9	22	GCF_900654235.1	Alteromonas sp. 76-1
405	ALSP010.0321.00001.C001	integron_02	CALIN	29	37	GCF_900654235.1	Alteromonas sp. 76-1
406	ALSP010.0321.00001.C001	integron_03	CALIN	2	2	GCF_900654235.1	Alteromonas sp. 76-1
407	ALSP019.0321.00001.C001	integron_01	CALIN	3	7	GCF_015767655.1	Alteromonas sp. B31-7
408	ALSP019.0321.00001.C001	integron_02	CALIN	3	1	GCF_015767655.1	Alteromonas sp. B31-7
409	ALSP019.0321.00001.C001	integron_03	CALIN	3	4	GCF_015767655.1	Alteromonas sp. B31-7
410	ALSP019.0321.00001.C001	integron_04	CALIN	2	3	GCF_015767655.1	Alteromonas sp. B31-7
411	ALSP019.0321.00001.C001	integron_05	complete	9	11	GCF_015767655.1	Alteromonas sp. B31-7
412	ALSP019.0321.00001.C001	integron_06	CALIN	3	6	GCF_015767655.1	Alteromonas sp. B31-7
413	ALST001.0321.00003.C001	integron_01	CALIN	8	19	GCF_001632825.1	Alteromonas stellipolaris
414	ALST001.0321.00003.C001	integron_02	CALIN	6	5	GCF_001632825.1	Alteromonas stellipolaris
415	ALST001.0321.00003.C001	integron_03	complete	2	4	GCF_001632825.1	Alteromonas stellipolaris
416	ALST001.0321.00003.C001	integron_04	CALIN	8	15	GCF_001632825.1	Alteromonas stellipolaris
417	ALST001.0321.00004.C001	integron_01	CALIN	13	16	GCF_001433715.1	Alteromonas stellipolaris LMG 21856
418	ALST001.0321.00004.C001	integron_02	complete	10	12	GCF_001433715.1	Alteromonas stellipolaris LMG 21856
419	ALXE001.0321.00001.C001	integron_01	CALIN	3	4	GCF_002072815.1	Alcanivorax xenomutans
420	AMJA002.0321.00001.C001	integron_01	complete	9	9	GCF_016592435.1	Amphritea japonica ATCC BAA-1530
421	AMJA002.0321.00001.C001	integron_02	CALIN	2	4	GCF_016592435.1	Amphritea japonica ATCC BAA-1530
422	AMJA002.0321.00001.C001	integron_03	CALIN	5	6	GCF_016592435.1	Amphritea japonica ATCC BAA-1530
423	AQGI001.0321.00001.C001	integron_01	complete	10	10	GCF_008087625.1	Aquisphaera giovannonii
424	AQGI001.0321.00001.C001	integron_02	CALIN	17	13	GCF_008087625.1	Aquisphaera giovannonii
425	AQOL001.0321.00001.P002	integron_01	In0		1	GCF_003100395.1	Aquabacterium olei
426	AQOL001.0321.00001.P002	integron_02	CALIN	3	4	GCF_003100395.1	Aquabacterium olei
427	AQSP006.0321.00001.C001	integron_01	CALIN	2	3	GCF_002002905.1	Aquaspirillum sp. LM1
428	AQSP006.0321.00001.C001	integron_02	CALIN	2	2	GCF_002002905.1	Aquaspirillum sp. LM1
429	AQSP006.0321.00001.C001	integron_03	CALIN	2	2	GCF_002002905.1	Aquaspirillum sp. LM1
430	AQSP008.0321.00001.C001	integron_01	complete	1	3	GCF_012044895.1	Aquisalimonas sp. 2447
431	ARAN001.0321.00001.C001	integron_01	CALIN	2	2	GCF_006459125.1	Arcobacter anaerophilus
432	ARAR001.0321.00001.C001	integron_01	complete	1	5	GCF_000025965.1	Aromatoleum aromaticum EbN1
433	ARAR001.0321.00001.C001	integron_02	CALIN	2	4	GCF_000025965.1	Aromatoleum aromaticum EbN1
434	ARCR001.0321.00001.C001	integron_01	CALIN	4	7	GCF_011045415.1	Arcobacter cryaerophilus
435	ARCR001.0321.00006.P002	integron_01	CALIN	2	3	GCF_003660105.1	Arcobacter cryaerophilus ATCC 43158
436	ARNI001.0321.00001.C001	integron_01	CALIN	8	15	GCF_000092245.1	Arcobacter nitrofigilis DSM 7299
437	ARSK001.0321.00002.C001	integron_01	CALIN	2	4	GCF_003544835.1	Arcobacter skirrowii CCUG 10374
438	AUHE001.0321.00001.C001	integron_01	CALIN	3	5	GCF_007752135.1	Aureliella helgolandensis
439	AUHE001.0321.00001.C001	integron_02	In0		1	GCF_007752135.1	Aureliella helgolandensis
440	AUHE001.0321.00001.C001	integron_03	CALIN	2	2	GCF_007752135.1	Aureliella helgolandensis
441	AUHE001.0321.00001.C001	integron_04	CALIN	2	4	GCF_007752135.1	Aureliella helgolandensis
442	AZCH001.0321.00001.C001	integron_01	CALIN	2	3	GCF_002220155.1	Azotobacter chroococcum
443	AZCH001.0321.00002.C001	integron_01	CALIN	3	4	GCF_016406165.1	Azotobacter chroococcum
444	AZCH001.0321.00002.C001	integron_02	CALIN	2	2	GCF_016406165.1	Azotobacter chroococcum
445	AZCH001.0321.00003.C001	integron_01	CALIN	3	4	GCF_000817975.1	Azotobacter chroococcum NCIMB 8003
446	AZCO001.0321.00001.C001	integron_01	complete	5	9	GCF_003111645.1	Azoarcus communis
447	AZCO001.0321.00002.C001	integron_01	CALIN	3	5	GCF_003111665.1	Azoarcus communis
448	AZOL001.0321.00001.C001	integron_01	CALIN	3	3	GCF_000061505.1	Azoarcus olearius
449	AZOL001.0321.00002.C001	integron_01	CALIN	6	7	GCF_001682385.1	Azoarcus olearius
450	AZOL001.0321.00002.C001	integron_02	CALIN	3	4	GCF_001682385.1	Azoarcus olearius
451	AZOL001.0321.00002.C001	integron_03	CALIN	4	5	GCF_001682385.1	Azoarcus olearius
452	AZOR001.0321.00001.C001	integron_01	CALIN	3	4	GCF_000236665.1	Azospira oryzae PS
453	AZOR001.0321.00001.C001	integron_02	CALIN	2	2	GCF_000236665.1	Azospira oryzae PS
454	AZOR001.0321.00001.C001	integron_03	CALIN	2	4	GCF_000236665.1	Azospira oryzae PS
455	AZPU001.0321.00001.C001	integron_01	CALIN	3	3	GCF_002872475.1	Azoarcus pumilus
456	AZRE001.0321.00001.C001	integron_01	In0		1	GCF_016858125.1	Azospira restricta
457	AZSA001.0321.00001.C001	integron_01	complete	2	4	GCF_009363155.1	Azotobacter salinestris
458	AZSP001.0321.00001.C001	integron_01	CALIN	2	3	GCF_009177135.1	Azospira sp. I09
459	AZSP001.0321.00001.C001	integron_02	CALIN	2	2	GCF_009177135.1	Azospira sp. I09
460	AZSP001.0321.00001.C001	integron_03	CALIN	2	3	GCF_009177135.1	Azospira sp. I09
461	AZSP001.0321.00001.C001	integron_04	CALIN	4	4	GCF_009177135.1	Azospira sp. I09
462	AZSP003.0321.00001.C001	integron_01	complete	3	6	GCF_001190925.1	Azoarcus sp. CIB
463	AZSP004.0321.00001.C001	integron_01	CALIN	3	3	GCF_010983895.1	Azoarcus sp. M9-3-2
464	AZSP004.0321.00001.C001	integron_02	complete	1	5	GCF_010983895.1	Azoarcus sp. M9-3-2
465	AZSP005.0321.00001.C001	integron_01	CALIN	4	7	GCF_006496635.1	Azoarcus sp. DD4
466	AZSP005.0321.00001.C001	integron_02	complete	1	4	GCF_006496635.1	Azoarcus sp. DD4
467	AZSP006.0321.00001.C001	integron_01	CALIN	2	3	GCF_003628555.1	Azoarcus sp. DN11
468	AZSP006.0321.00001.C001	integron_02	In0		1	GCF_003628555.1	Azoarcus sp. DN11
469	AZSP010.0321.00001.C001	integron_01	complete	1	3	GCF_000349945.1	Azoarcus sp. KH32C
470	BAFR002.0321.00003.P003	integron_01	CALIN	2	3	GCF_000724665.2	Bacteroides fragilis
471	BAME001.0321.00020.P005	integron_01	CALIN	2	1	GCF_000832985.1	Bacillus megaterium NBRC 15308 = ATCC 14581
472	BAOV001.0321.00002.P004	integron_01	CALIN	2	7	GCF_007012325.1	Bacteroides ovatus
473	BASA001.0321.00001.C001	integron_01	CALIN	2	3	GCF_002237535.1	Bacterioplanes sanyensis
474	BATH002.0321.00001.C001	integron_01	CALIN	3	9	GCF_003711265.1	Bathymodiolus thermophilus thioautotrophic gill symbiont
475	BATH002.0321.00001.C001	integron_02	CALIN	3	3	GCF_003711265.1	Bathymodiolus thermophilus thioautotrophic gill symbiont
476	BATH002.0321.00001.C001	integron_03	CALIN	2	4	GCF_003711265.1	Bathymodiolus thermophilus thioautotrophic gill symbiont
477	BAXY001.0321.00001.P003	integron_01	CALIN	2	8	GCF_006546965.1	Bacteroides xylanisolvens
478	BELE001.0321.00001.C001	integron_01	CALIN	2	3	GCF_001305575.3	Beggiatoa leptomitoformis
479	BELE001.0321.00002.C001	integron_01	CALIN	2	3	GCF_002849755.2	Beggiatoa leptomitoformis
480	BEMA001.0321.00001.C001	integron_01	CALIN	3	7	GCF_012295615.1	Bermanella marisrubri
481	BEMA001.0321.00001.C001	integron_02	CALIN	2	6	GCF_012295615.1	Bermanella marisrubri
482	BEMA001.0321.00001.C001	integron_03	complete	2	9	GCF_012295615.1	Bermanella marisrubri
483	BEMA001.0321.00001.C001	integron_04	CALIN	4	4	GCF_012295615.1	Bermanella marisrubri
484	BEMA001.0321.00001.C001	integron_05	CALIN	3	6	GCF_012295615.1	Bermanella marisrubri
485	BEMA001.0321.00001.C001	integron_06	CALIN	2	3	GCF_012295615.1	Bermanella marisrubri
486	BOTR001.0321.00003.C001	integron_01	CALIN	3	5	GCF_011386965.1	Bordetella trematum
487	BOTR001.0321.00003.C001	integron_02	complete	4	6	GCF_011386965.1	Bordetella trematum
488	CAAB001.0321.00001.C001	integron_01	CALIN	3	9	GCF_001886815.1	Caldithrix abyssi DSM 13497
489	CAAB001.0321.00001.C001	integron_02	CALIN	4	1	GCF_001886815.1	Caldithrix abyssi DSM 13497
490	CAAB001.0321.00001.C001	integron_03	CALIN	15	16	GCF_001886815.1	Caldithrix abyssi DSM 13497
491	CAAC002.0321.00001.C001	integron_01	CALIN	7	7	GCF_000024165.1	Candidatus Accumulibacter phosphatis clade IIA str. UW-1
492	CAAC002.0321.00001.C001	integron_02	CALIN	4	5	GCF_000024165.1	Candidatus Accumulibacter phosphatis clade IIA str. UW-1
493	CAAC002.0321.00001.C001	integron_03	CALIN	2	3	GCF_000024165.1	Candidatus Accumulibacter phosphatis clade IIA str. UW-1
494	CAAC002.0321.00001.C001	integron_04	complete	4	6	GCF_000024165.1	Candidatus Accumulibacter phosphatis clade IIA str. UW-1
495	CAAC002.0321.00001.C001	integron_05	CALIN	6	7	GCF_000024165.1	Candidatus Accumulibacter phosphatis clade IIA str. UW-1
496	CAAC002.0321.00001.C001	integron_06	CALIN	5	9	GCF_000024165.1	Candidatus Accumulibacter phosphatis clade IIA str. UW-1
497	CAAE001.0321.00001.C001	integron_01	In0		1	GCF_000281175.1	Caldilinea aerophila DSM 14535 = NBRC 104270
498	CAAE001.0321.00001.C001	integron_02	complete	2	5	GCF_000281175.1	Caldilinea aerophila DSM 14535 = NBRC 104270
499	CAHU001.0321.00001.C001	integron_01	complete	4	5	GCF_009746125.1	Casimicrobium huifangae
500	CAKU001.0321.00001.C001	integron_01	CALIN	3	3	GCF_011066545.1	Candidatus Kuenenia stuttgartiensis
501	CAKU001.0321.00001.C001	integron_02	CALIN	2	1	GCF_011066545.1	Candidatus Kuenenia stuttgartiensis
502	CAKU001.0321.00001.C001	integron_03	CALIN	5	6	GCF_011066545.1	Candidatus Kuenenia stuttgartiensis
503	CAKU001.0321.00001.C001	integron_04	CALIN	2	3	GCF_011066545.1	Candidatus Kuenenia stuttgartiensis
504	CAKU001.0321.00001.C001	integron_05	In0		1	GCF_011066545.1	Candidatus Kuenenia stuttgartiensis
505	CAKU001.0321.00001.C001	integron_06	CALIN	2	2	GCF_011066545.1	Candidatus Kuenenia stuttgartiensis
506	CAKU001.0321.00002.C001	integron_01	CALIN	2	2	GCF_900232105.1	Candidatus Kuenenia stuttgartiensis
507	CAKU001.0321.00002.C001	integron_02	complete	1	3	GCF_900232105.1	Candidatus Kuenenia stuttgartiensis
508	CAKU001.0321.00002.C001	integron_03	CALIN	2	3	GCF_900232105.1	Candidatus Kuenenia stuttgartiensis
509	CAKU001.0321.00002.C001	integron_04	CALIN	3	11	GCF_900232105.1	Candidatus Kuenenia stuttgartiensis
510	CAKU001.0321.00002.C001	integron_05	CALIN	2	1	GCF_900232105.1	Candidatus Kuenenia stuttgartiensis
511	CAME006.0321.00001.C001	integron_01	complete	1	3	GCF_009498235.1	Candidatus Methylospira mobilis
512	CANI008.0321.00001.C001	integron_01	CALIN	3	5	GCF_001458695.1	Candidatus Nitrospira inopinata
513	CANI008.0321.00001.C001	integron_02	CALIN	3	4	GCF_001458695.1	Candidatus Nitrospira inopinata
514	CAPA002.0321.00001.P002	integron_01	CALIN	2	4	GCF_000742835.1	Candidatus Paracaedibacter acanthamoebae
515	CARE002.0321.00001.C001	integron_01	CALIN	3	4	GCF_013343005.1	Candidatus Reidiella endopervernicosa
516	CARE002.0321.00001.C001	integron_02	CALIN	3	6	GCF_013343005.1	Candidatus Reidiella endopervernicosa
517	CARE002.0321.00001.C001	integron_03	CALIN	2	2	GCF_013343005.1	Candidatus Reidiella endopervernicosa
518	CARE002.0321.00001.C001	integron_04	CALIN	2	2	GCF_013343005.1	Candidatus Reidiella endopervernicosa
519	CARE002.0321.00001.C001	integron_05	CALIN	3	4	GCF_013343005.1	Candidatus Reidiella endopervernicosa
520	CARE002.0321.00001.C001	integron_06	CALIN	4	1	GCF_013343005.1	Candidatus Reidiella endopervernicosa
521	CARE002.0321.00001.C001	integron_07	CALIN	3	2	GCF_013343005.1	Candidatus Reidiella endopervernicosa
522	CASE001.0321.00001.C001	integron_01	complete	5	9	GCF_007289895.1	Catenovulum sediminis
523	CASP017.0321.00001.C001	integron_01	CALIN	2	3	GCF_002368395.1	Calothrix sp. NIES-3974
524	CASP017.0321.00001.C001	integron_02	In0		1	GCF_002368395.1	Calothrix sp. NIES-3974
525	CASP021.0321.00001.C001	integron_01	complete	4	5	GCF_003063625.1	Catenovulum sp. CCB-QB4
526	CASP021.0321.00001.C001	integron_02	complete	1	5	GCF_003063625.1	Catenovulum sp. CCB-QB4
527	CASP021.0321.00001.C001	integron_03	CALIN	2	3	GCF_003063625.1	Catenovulum sp. CCB-QB4
528	CASU001.0321.00001.C001	integron_01	CALIN	3	5	GCF_015265455.1	Candidatus Sulfurimonas baltica
529	CASU001.0321.00001.C001	integron_02	In0		1	GCF_015265455.1	Candidatus Sulfurimonas baltica
530	CASU002.0321.00001.C001	integron_01	complete	3	6	GCF_015265475.1	Candidatus Sulfurimonas marisnigri
531	CASY001.0321.00001.C001	integron_01	complete	2	3	GCF_000477435.1	Candidatus Symbiobacter mobilis CR
532	CASY001.0321.00001.C001	integron_02	CALIN	2	6	GCF_000477435.1	Candidatus Symbiobacter mobilis CR
533	CASY001.0321.00001.C001	integron_03	CALIN	4	9	GCF_000477435.1	Candidatus Symbiobacter mobilis CR
534	CATH001.0321.00001.P002	integron_01	CALIN	2	5	GCF_002813775.1	Candidatus Thiodictyon syntrophicum
535	CATH001.0321.00001.P002	integron_02	In0		1	GCF_002813775.1	Candidatus Thiodictyon syntrophicum
536	CEJA001.0321.00001.C001	integron_01	complete	2	4	GCF_000019225.1	Cellvibrio japonicus Ueda107
537	CESP002.0321.00001.C001	integron_01	CALIN	3	6	GCF_002007605.1	Cellvibrio sp. PSBB023
538	CESP002.0321.00001.C001	integron_02	complete	8	8	GCF_002007605.1	Cellvibrio sp. PSBB023
539	CESP002.0321.00001.C001	integron_03	CALIN	2	3	GCF_002007605.1	Cellvibrio sp. PSBB023
540	CESP004.0321.00001.C001	integron_01	CALIN	2	5	GCF_002162135.1	Cellvibrio sp. PSBB006
541	CESP006.0321.00001.C001	integron_01	CALIN	3	3	GCF_008806975.1	Cellvibrio sp. KY-GH-1
542	CESP006.0321.00001.C001	integron_02	CALIN	6	6	GCF_008806975.1	Cellvibrio sp. KY-GH-1
543	CESP006.0321.00001.C001	integron_03	complete	5	4	GCF_008806975.1	Cellvibrio sp. KY-GH-1
544	CESP006.0321.00001.C001	integron_04	CALIN	3	3	GCF_008806975.1	Cellvibrio sp. KY-GH-1
545	CESP015.0321.00001.C001	integron_01	CALIN	2	2	GCF_008806955.1	Cellvibrio sp. KY-YJ-3
546	CESP015.0321.00001.C001	integron_02	CALIN	4	5	GCF_008806955.1	Cellvibrio sp. KY-YJ-3
547	CESP015.0321.00001.C001	integron_03	CALIN	3	4	GCF_008806955.1	Cellvibrio sp. KY-YJ-3
548	CESP015.0321.00001.C001	integron_04	CALIN	4	7	GCF_008806955.1	Cellvibrio sp. KY-YJ-3
549	CHAG001.0321.00001.C001	integron_01	complete	1	5	GCF_000021945.1	Chloroflexus aggregans DSM 9485
550	CHAU001.0321.00001.C001	integron_01	CALIN	5	12	GCF_000018865.1	Chloroflexus aurantiacus J-10-fl
551	CHAU001.0321.00002.C001	integron_01	CALIN	5	12	GCF_000022185.1	Chloroflexus aurantiacus Y-400-fl
552	CHLI001.0321.00001.C001	integron_01	CALIN	3	3	GCF_000020465.1	Chlorobium limicola DSM 245
553	CHPH002.0321.00001.C001	integron_01	complete	3	9	GCF_000015125.1	Chlorobium phaeobacteroides DSM 266
554	CHPH002.0321.00001.C001	integron_02	CALIN	3	5	GCF_000015125.1	Chlorobium phaeobacteroides DSM 266
555	CHPH002.0321.00001.C001	integron_03	CALIN	2	4	GCF_000015125.1	Chlorobium phaeobacteroides DSM 266
556	CHPH002.0321.00002.C001	integron_01	In0		1	GCF_000020545.1	Chlorobium phaeobacteroides BS1
557	CHPH002.0321.00002.C001	integron_02	CALIN	2	3	GCF_000020545.1	Chlorobium phaeobacteroides BS1
558	CHPH002.0321.00002.C001	integron_03	CALIN	2	3	GCF_000020545.1	Chlorobium phaeobacteroides BS1
559	CHSA001.0321.00001.C001	integron_01	CALIN	3	5	GCF_000055785.1	Chromohalobacter salexigens DSM 3043
560	CHSA001.0321.00001.C001	integron_02	CALIN	2	2	GCF_000055785.1	Chromohalobacter salexigens DSM 3043
561	CHSA001.0321.00001.C001	integron_03	CALIN	2	3	GCF_000055785.1	Chromohalobacter salexigens DSM 3043
562	CHTH001.0321.00001.C001	integron_01	In0		1	GCF_000020525.1	Chloroherpeton thalassium ATCC 35110
563	CHTH001.0321.00001.C001	integron_02	CALIN	2	2	GCF_000020525.1	Chloroherpeton thalassium ATCC 35110
564	CHVA001.0321.00002.C001	integron_01	CALIN	3	4	GCF_002952135.1	Chromobacterium vaccinii
565	CHVI001.0321.00002.C001	integron_01	CALIN	2	3	GCF_012273555.1	Chromobacterium violaceum
566	CIFA001.0321.00001.C001	integron_01	complete	1	2	GCF_002249995.1	Citrobacter farmeri
567	CIFA001.0321.00001.P002	integron_01	complete	1	3	GCF_002249995.1	Citrobacter farmeri
568	CIFA001.0321.00001.P002	integron_02	In0		1	GCF_002249995.1	Citrobacter farmeri
569	CIFA001.0321.00001.P002	integron_03	CALIN	4	5	GCF_002249995.1	Citrobacter farmeri
570	CIFR001.0321.00001.P002	integron_01	complete	1	3	GCF_002880615.1	Citrobacter freundii complex sp. CFNIH2
571	CIFR001.0321.00001.P002	integron_02	CALIN	3	4	GCF_002880615.1	Citrobacter freundii complex sp. CFNIH2
572	CIFR002.0321.00001.C001	integron_01	CALIN	3	5	GCF_002903215.1	Citrobacter freundii complex sp. CFNIH3
573	CIFR002.0321.00001.P003	integron_01	CALIN	2	3	GCF_002903215.1	Citrobacter freundii complex sp. CFNIH3
574	CIFR003.0321.00001.P003	integron_01	complete	2	4	GCF_002934505.1	Citrobacter freundii complex sp. CFNIH4
575	CIFR003.0321.00001.P003	integron_02	complete	4	7	GCF_002934505.1	Citrobacter freundii complex sp. CFNIH4
576	CIFR004.0321.00001.P002	integron_01	complete	7	10	GCF_002903305.1	Citrobacter freundii complex sp. CFNIH9
577	CIFR004.0321.00001.P002	integron_02	In0		1	GCF_002903305.1	Citrobacter freundii complex sp. CFNIH9
578	CIFR005.0321.00003.P002	integron_01	complete	4	6	GCF_001022155.1	Citrobacter freundii
579	CIFR005.0321.00003.P004	integron_01	complete	2	4	GCF_001022155.1	Citrobacter freundii
580	CIFR005.0321.00004.P002	integron_01	complete	2	4	GCF_001022275.1	Citrobacter freundii
581	CIFR005.0321.00005.P002	integron_01	complete	3	4	GCF_001702455.1	Citrobacter freundii
582	CIFR005.0321.00005.P003	integron_01	complete	4	6	GCF_001702455.1	Citrobacter freundii
583	CIFR005.0321.00006.P002	integron_01	In0		1	GCF_001718055.1	Citrobacter freundii
584	CIFR005.0321.00006.P003	integron_01	CALIN	3		GCF_001718055.1	Citrobacter freundii
585	CIFR005.0321.00006.P003	integron_02	complete	3	6	GCF_001718055.1	Citrobacter freundii
586	CIFR005.0321.00013.C001	integron_01	complete	1	2	GCF_003571565.1	Citrobacter freundii
587	CIFR005.0321.00013.C001	integron_02	CALIN	3	4	GCF_003571565.1	Citrobacter freundii
588	CIFR005.0321.00013.P003	integron_01	complete	1	3	GCF_003571565.1	Citrobacter freundii
589	CIFR005.0321.00013.P004	integron_01	complete	1	3	GCF_003571565.1	Citrobacter freundii
590	CIFR005.0321.00022.P002	integron_01	complete	3	5	GCF_004103775.1	Citrobacter freundii
591	CIFR005.0321.00023.P004	integron_01	complete	2	4	GCF_004344985.1	Citrobacter freundii
592	CIFR005.0321.00025.P002	integron_01	In0		1	GCF_005960425.1	Citrobacter freundii
593	CIFR005.0321.00025.P002	integron_02	complete	1	3	GCF_005960425.1	Citrobacter freundii
594	CIFR005.0321.00025.P002	integron_03	complete	1	2	GCF_005960425.1	Citrobacter freundii
595	CIFR005.0321.00025.P003	integron_01	complete	3	6	GCF_005960425.1	Citrobacter freundii
596	CIFR005.0321.00026.C001	integron_01	complete	1	3	GCF_008931485.1	Citrobacter freundii
597	CIFR005.0321.00026.C001	integron_02	CALIN	3	4	GCF_008931485.1	Citrobacter freundii
598	CIFR005.0321.00026.P003	integron_01	complete	4	6	GCF_008931485.1	Citrobacter freundii
599	CIFR005.0321.00026.P003	integron_02	CALIN	4	5	GCF_008931485.1	Citrobacter freundii
600	CIFR005.0321.00027.C001	integron_01	complete	1	3	GCF_008931505.1	Citrobacter freundii
601	CIFR005.0321.00027.C001	integron_02	CALIN	3	4	GCF_008931505.1	Citrobacter freundii
602	CIFR005.0321.00027.P003	integron_01	complete	4	6	GCF_008931505.1	Citrobacter freundii
603	CIFR005.0321.00027.P003	integron_02	CALIN	4	5	GCF_008931505.1	Citrobacter freundii
604	CIFR005.0321.00028.P003	integron_01	complete	4	6	GCF_008931625.1	Citrobacter freundii
605	CIFR005.0321.00029.P004	integron_01	complete	4	6	GCF_008931685.1	Citrobacter freundii
606	CIFR005.0321.00030.P002	integron_01	complete	2	4	GCF_009664025.1	Citrobacter freundii
607	CIFR005.0321.00030.P002	integron_02	CALIN	2	3	GCF_009664025.1	Citrobacter freundii
608	CIFR005.0321.00030.P002	integron_03	complete	2	4	GCF_009664025.1	Citrobacter freundii
609	CIFR005.0321.00031.P002	integron_01	complete	2	4	GCF_009664045.1	Citrobacter freundii
610	CIFR005.0321.00031.P002	integron_02	CALIN	2	3	GCF_009664045.1	Citrobacter freundii
611	CIFR005.0321.00032.P002	integron_01	CALIN	2	3	GCF_009664065.1	Citrobacter freundii
612	CIFR005.0321.00032.P002	integron_02	CALIN	2	3	GCF_009664065.1	Citrobacter freundii
613	CIFR005.0321.00032.P002	integron_03	complete	2	4	GCF_009664065.1	Citrobacter freundii
614	CIFR005.0321.00032.P002	integron_04	complete	2	4	GCF_009664065.1	Citrobacter freundii
615	CIFR005.0321.00033.C001	integron_01	complete	3	5	GCF_009856695.1	Citrobacter freundii
616	CIFR005.0321.00034.P002	integron_01	complete	3	6	GCF_009857035.1	Citrobacter freundii
617	CIFR005.0321.00034.P002	integron_02	CALIN	2	2	GCF_009857035.1	Citrobacter freundii
618	CIFR005.0321.00035.P003	integron_01	complete	1	4	GCF_010365585.1	Citrobacter freundii
619	CIFR005.0321.00035.P003	integron_02	complete	3	5	GCF_010365585.1	Citrobacter freundii
620	CIFR005.0321.00038.P003	integron_01	complete	2	4	GCF_013389635.1	Citrobacter freundii
621	CIFR005.0321.00044.C001	integron_01	complete	1	2	GCF_013614655.1	Citrobacter freundii
622	CIFR005.0321.00044.C001	integron_02	In0		1	GCF_013614655.1	Citrobacter freundii
623	CIFR005.0321.00044.P002	integron_01	complete	1	2	GCF_013614655.1	Citrobacter freundii
624	CIFR005.0321.00047.C001	integron_01	CALIN	3	4	GCF_013725165.1	Citrobacter freundii
625	CIFR005.0321.00058.P004	integron_01	complete	4	6	GCF_013740875.1	Citrobacter freundii
626	CIFR005.0321.00089.P003	integron_01	complete	1	3	GCF_013826265.1	Citrobacter freundii
627	CIFR005.0321.00092.P002	integron_01	complete	2	4	GCF_013874155.1	Citrobacter freundii
628	CIFR005.0321.00092.P002	integron_02	CALIN	3	4	GCF_013874155.1	Citrobacter freundii
629	CIFR005.0321.00092.P002	integron_03	complete	2	4	GCF_013874155.1	Citrobacter freundii
630	CIFR005.0321.00092.P002	integron_04	complete	5	6	GCF_013874155.1	Citrobacter freundii
631	CIFR005.0321.00101.C001	integron_01	CALIN	3	3	GCF_014169975.1	Citrobacter freundii
632	CIFR005.0321.00101.P002	integron_01	complete	3	4	GCF_014169975.1	Citrobacter freundii
633	CIFR005.0321.00102.C001	integron_01	CALIN	3	4	GCF_014170055.1	Citrobacter freundii
634	CIFR005.0321.00102.P002	integron_01	complete	4	6	GCF_014170055.1	Citrobacter freundii
635	CIFR005.0321.00103.C001	integron_01	CALIN	3	4	GCF_014189285.1	Citrobacter freundii
636	CIFR005.0321.00103.P002	integron_01	complete	4	5	GCF_014189285.1	Citrobacter freundii
637	CIFR005.0321.00104.C001	integron_01	CALIN	3	4	GCF_014189355.1	Citrobacter freundii
638	CIFR005.0321.00104.P002	integron_01	complete	4	6	GCF_014189355.1	Citrobacter freundii
639	CIFR005.0321.00105.C001	integron_01	CALIN	3	4	GCF_014189375.1	Citrobacter freundii
640	CIFR005.0321.00105.P002	integron_01	complete	4	6	GCF_014189375.1	Citrobacter freundii
641	CIFR005.0321.00106.P002	integron_01	CALIN	2	3	GCF_014337275.1	Citrobacter freundii
642	CIFR005.0321.00107.P002	integron_01	CALIN	2	3	GCF_014337295.1	Citrobacter freundii
643	CIFR005.0321.00108.P002	integron_01	CALIN	2	3	GCF_014337315.1	Citrobacter freundii
644	CIFR005.0321.00109.P002	integron_01	CALIN	2	3	GCF_014337335.1	Citrobacter freundii
645	CIFR005.0321.00110.C001	integron_01	CALIN	3	4	GCF_014725915.1	Citrobacter freundii
646	CIFR005.0321.00110.P002	integron_01	complete	4	6	GCF_014725915.1	Citrobacter freundii
647	CIFR005.0321.00111.P003	integron_01	complete	1	3	GCF_015910405.1	Citrobacter freundii
648	CIFR005.0321.00111.P003	integron_02	complete	2	4	GCF_015910405.1	Citrobacter freundii
649	CIFR005.0321.00112.P002	integron_01	complete	4	6	GCF_016939595.1	Citrobacter freundii
650	CIFR005.0321.00112.P004	integron_01	In0		1	GCF_016939595.1	Citrobacter freundii
651	CIFR005.0321.00113.C001	integron_01	CALIN	3	4	GCF_016939615.1	Citrobacter freundii
652	CIFR005.0321.00114.P002	integron_01	complete	4	6	GCF_016939655.1	Citrobacter freundii
653	CIFR005.0321.00114.P005	integron_01	In0		1	GCF_016939655.1	Citrobacter freundii
654	CIFR005.0321.00114.P006	integron_01	complete	4	6	GCF_016939655.1	Citrobacter freundii
655	CIFR005.0321.00114.P006	integron_02	In0		1	GCF_016939655.1	Citrobacter freundii
656	CIFR005.0321.00116.C001	integron_01	CALIN	3	4	GCF_900520335.1	Citrobacter freundii
657	CIFR005.0321.00116.P002	integron_01	complete	2	4	GCF_900520335.1	Citrobacter freundii
658	CIFR005.0321.00116.P003	integron_01	complete	2	4	GCF_900520335.1	Citrobacter freundii
659	CIFR005.0321.00116.P003	integron_02	complete	2	4	GCF_900520335.1	Citrobacter freundii
660	CIFR005.0321.00117.P002	integron_01	CALIN	2	3	GCF_900520375.1	Citrobacter freundii
661	CIFR005.0321.00122.C001	integron_01	complete	2	4	GCF_000648515.1	Citrobacter freundii CFNIH1
662	CIFR005.0321.00122.C001	integron_02	complete	2	3	GCF_000648515.1	Citrobacter freundii CFNIH1
663	CIFR005.0321.00122.P002	integron_01	complete	1	3	GCF_000648515.1	Citrobacter freundii CFNIH1
664	CIFR005.0321.00122.P002	integron_02	complete	1	3	GCF_000648515.1	Citrobacter freundii CFNIH1
665	CIFR005.0321.00122.P002	integron_03	complete	2	4	GCF_000648515.1	Citrobacter freundii CFNIH1
666	CIKO001.0321.00003.C001	integron_01	complete	3	5	GCF_002947035.1	Citrobacter koseri
667	CIPO001.0321.00003.P002	integron_01	complete	4	9	GCF_008086465.1	Citrobacter portucalensis
668	CIPO001.0321.00005.P002	integron_01	complete	2	4	GCF_009730355.1	Citrobacter portucalensis
669	CIPO001.0321.00006.C001	integron_01	In0		1	GCF_010319905.2	Citrobacter portucalensis
670	CIPO001.0321.00006.C001	integron_02	CALIN	2	1	GCF_010319905.2	Citrobacter portucalensis
671	CIPO001.0321.00006.P002	integron_01	complete	3	5	GCF_010319905.2	Citrobacter portucalensis
672	CIPO001.0321.00007.P002	integron_01	In0		1	GCF_015134935.1	Citrobacter portucalensis
673	CIPO001.0321.00008.P002	integron_01	complete	2	3	GCF_015135075.1	Citrobacter portucalensis
674	CIPO001.0321.00008.P002	integron_02	complete	2	4	GCF_015135075.1	Citrobacter portucalensis
675	CIPO001.0321.00009.P002	integron_01	complete	2	4	GCF_015135215.1	Citrobacter portucalensis
676	CIPO001.0321.00009.P002	integron_02	complete	2	3	GCF_015135215.1	Citrobacter portucalensis
677	CIPO001.0321.00010.P002	integron_01	In0		1	GCF_015137095.1	Citrobacter portucalensis
678	CIPO001.0321.00011.P002	integron_01	complete	2	3	GCF_015137255.1	Citrobacter portucalensis
679	CIPO001.0321.00011.P002	integron_02	complete	1	3	GCF_015137255.1	Citrobacter portucalensis
680	CIPO001.0321.00012.P002	integron_01	complete	2	3	GCF_015138175.1	Citrobacter portucalensis
681	CIPO001.0321.00012.P002	integron_02	complete	2	4	GCF_015138175.1	Citrobacter portucalensis
682	CISP004.0321.00001.P002	integron_01	complete	3	5	GCF_003204265.1	Citrobacter sp. CRE-46
683	CISP004.0321.00001.P002	integron_02	CALIN	2	3	GCF_003204265.1	Citrobacter sp. CRE-46
684	CISP006.0321.00001.P002	integron_01	complete	1	3	GCF_002934585.1	Citrobacter sp. CFNIH10
685	CISP006.0321.00001.P004	integron_01	CALIN	2	3	GCF_002934585.1	Citrobacter sp. CFNIH10
686	CISP007.0321.00001.C001	integron_01	complete	2	4	GCF_004322975.1	Citrobacter sp. ABFQG
687	CISP009.0321.00001.P003	integron_01	complete	4	7	GCF_006385635.1	Citrobacter sp. CF971
688	CISP009.0321.00001.P005	integron_01	complete	3	6	GCF_006385635.1	Citrobacter sp. CF971
689	CISP012.0321.00001.P003	integron_01	CALIN	3	4	GCF_009649895.1	Citrobacter sp. H12-3-2
690	CISP012.0321.00001.P003	integron_02	CALIN	4	5	GCF_009649895.1	Citrobacter sp. H12-3-2
691	CISP012.0321.00001.P003	integron_03	complete	1	3	GCF_009649895.1	Citrobacter sp. H12-3-2
692	CISP013.0321.00001.P003	integron_01	CALIN	3	4	GCF_009649935.1	Citrobacter sp. S40-1-2
693	CISP013.0321.00001.P003	integron_02	CALIN	4	5	GCF_009649935.1	Citrobacter sp. S40-1-2
694	CISP013.0321.00001.P003	integron_03	complete	1	3	GCF_009649935.1	Citrobacter sp. S40-1-2
695	CISP014.0321.00001.C001	integron_01	complete	3	5	GCF_013458095.1	Citrobacter sp. 172116965
696	CISP053.0321.00001.C001	integron_01	complete	2	4	GCF_016894305.1	Citrobacter sp. B72
697	CIWE001.0321.00004.P002	integron_01	complete	2	4	GCF_008693645.1	Citrobacter werkmanii
698	COAK001.0321.00001.C001	integron_01	In0		1	GCF_000025905.1	Coraliomargarita akajimensis DSM 45221
699	COAK001.0321.00001.C001	integron_02	complete	3	12	GCF_000025905.1	Coraliomargarita akajimensis DSM 45221
700	COBE001.0321.00001.C001	integron_01	CALIN	5	11	GCF_002076895.1	Colwellia beringensis
701	CODI001.0321.00005.C001	integron_01	CALIN	2	3	GCF_004758745.1	Corynebacterium diphtheriae
702	CODI001.0321.00020.C001	integron_01	In0		1	GCF_000241935.1	Corynebacterium diphtheriae BH8
703	COKE002.0321.00001.C001	integron_01	CALIN	7	9	GCF_002056725.1	Comamonas kerstersii
704	COKO001.0321.00001.C001	integron_01	CALIN	3	4	GCF_014076495.1	Comamonas koreensis
705	COKO001.0321.00001.C001	integron_02	complete	3	5	GCF_014076495.1	Comamonas koreensis
706	COPA001.0321.00001.C001	integron_01	CALIN	3	4	GCF_009931455.1	Cobetia pacifica
707	COPS003.0321.00001.C001	integron_01	CALIN	2	4	GCF_000012325.1	Colwellia psychrerythraea 34H
708	COPS003.0321.00001.C001	integron_02	CALIN	3	4	GCF_000012325.1	Colwellia psychrerythraea 34H
709	COPS003.0321.00001.C001	integron_03	CALIN	3	4	GCF_000012325.1	Colwellia psychrerythraea 34H
710	COSE001.0321.00001.C001	integron_01	complete	10	6	GCF_002158865.1	Comamonas serinivorans
711	COSE001.0321.00001.C001	integron_02	CALIN	4	5	GCF_002158865.1	Comamonas serinivorans
712	COSE001.0321.00001.C001	integron_03	CALIN	4	5	GCF_002158865.1	Comamonas serinivorans
713	COSP003.0321.00001.C001	integron_01	CALIN	2	5	GCF_001767295.1	Colwellia sp. PAMC 20917
714	COSP003.0321.00001.C001	integron_02	In0		1	GCF_001767295.1	Colwellia sp. PAMC 20917
715	COSP004.0321.00001.C001	integron_01	In0		1	GCF_002077175.1	Colwellia sp. PAMC 21821
716	COSP004.0321.00001.C001	integron_02	complete	1	5	GCF_002077175.1	Colwellia sp. PAMC 21821
717	COSP004.0321.00001.C001	integron_03	In0		1	GCF_002077175.1	Colwellia sp. PAMC 21821
718	COSP009.0321.00001.C001	integron_01	CALIN	5	11	GCF_003061515.1	Colwellia sp. Arc7-D
719	COSP009.0321.00001.C001	integron_02	CALIN	2	7	GCF_003061515.1	Colwellia sp. Arc7-D
720	COSP009.0321.00001.C001	integron_03	complete	7	10	GCF_003061515.1	Colwellia sp. Arc7-D
721	COSP009.0321.00001.C001	integron_04	CALIN	2	5	GCF_003061515.1	Colwellia sp. Arc7-D
722	COSP012.0321.00001.C001	integron_01	CALIN	3	3	GCF_003971255.1	Colwellia sp. Arc7-635
723	COSP012.0321.00001.C001	integron_02	CALIN	8	14	GCF_003971255.1	Colwellia sp. Arc7-635
724	COSP012.0321.00001.C001	integron_03	CALIN	4	6	GCF_003971255.1	Colwellia sp. Arc7-635
725	COSP012.0321.00001.C001	integron_04	CALIN	10	13	GCF_003971255.1	Colwellia sp. Arc7-635
726	COSP012.0321.00001.C001	integron_05	CALIN	2	5	GCF_003971255.1	Colwellia sp. Arc7-635
727	COSP012.0321.00001.C001	integron_06	complete	5	5	GCF_003971255.1	Colwellia sp. Arc7-635
728	COSP012.0321.00001.C001	integron_07	CALIN	4	7	GCF_003971255.1	Colwellia sp. Arc7-635
729	COSP012.0321.00001.C001	integron_08	CALIN	2	2	GCF_003971255.1	Colwellia sp. Arc7-635
730	COSP013.0321.00001.C001	integron_01	complete	6	11	GCF_007954405.1	Comamonas sp. NLF-7-7
731	COSP023.0321.00001.C001	integron_01	CALIN	3	3	GCF_009832865.1	Colwellia sp. 20A7
732	COSP023.0321.00001.C001	integron_02	complete	4	8	GCF_009832865.1	Colwellia sp. 20A7
733	COSP031.0321.00001.C001	integron_01	CALIN	7	3	GCF_001444365.1	Colwellia sp. MT41
734	COSP031.0321.00001.C001	integron_02	CALIN	8	8	GCF_001444365.1	Colwellia sp. MT41
735	COSP031.0321.00001.C001	integron_03	CALIN	4	4	GCF_001444365.1	Colwellia sp. MT41
736	COSP031.0321.00001.C001	integron_04	complete	7	11	GCF_001444365.1	Colwellia sp. MT41
737	COSP031.0321.00001.C001	integron_05	CALIN	3	8	GCF_001444365.1	Colwellia sp. MT41
738	COSP031.0321.00001.C001	integron_06	CALIN	2	3	GCF_001444365.1	Colwellia sp. MT41
739	COSP031.0321.00001.C001	integron_07	CALIN	5	3	GCF_001444365.1	Colwellia sp. MT41
740	COTE002.0321.00001.C001	integron_01	CALIN	2	2	GCF_008727115.1	Comamonas testosteroni
741	COTE002.0321.00001.C001	integron_02	complete	1	4	GCF_008727115.1	Comamonas testosteroni
742	COTE002.0321.00002.C001	integron_01	CALIN	4	5	GCF_014076415.1	Comamonas testosteroni
743	COTE002.0321.00003.P002	integron_01	complete	4	7	GCF_014076475.1	Comamonas testosteroni
744	COTH001.0321.00001.C001	integron_01	In0		1	GCF_000093145.3	Comamonas thiooxydans
745	COTH001.0321.00002.P002	integron_01	complete	2	3	GCF_001406795.1	Comamonas thiooxydans
746	COTH001.0321.00003.C001	integron_01	CALIN	2	2	GCF_013256255.1	Comamonas thiooxydans
747	COTH001.0321.00004.C001	integron_01	complete	1	3	GCF_014931035.1	Comamonas thiooxydans
748	COTH001.0321.00004.C001	integron_02	CALIN	2	2	GCF_014931035.1	Comamonas thiooxydans
749	CRSA001.0321.00004.C001	integron_01	complete	1	3	GCF_003955925.1	Cronobacter sakazakii
750	CRSA001.0321.00004.P002	integron_01	complete	3	5	GCF_003955925.1	Cronobacter sakazakii
751	CRSA001.0321.00004.P002	integron_02	In0		1	GCF_003955925.1	Cronobacter sakazakii
752	CRSA001.0321.00004.P002	integron_03	complete	1	2	GCF_003955925.1	Cronobacter sakazakii
753	CUNE001.0321.00006.P003	integron_01	CALIN	2	4	GCF_000219215.1	Cupriavidus necator N-1
754	CUOX001.0321.00002.P003	integron_01	CALIN	2	3	GCF_008807855.1	Cupriavidus oxalaticus
755	CYGR001.0321.00001.C001	integron_01	In0		1	GCF_000316515.1	Cyanobium gracile PCC 6307
756	CYGR001.0321.00001.C001	integron_02	CALIN	2	3	GCF_000316515.1	Cyanobium gracile PCC 6307
757	CYSP001.0321.00001.C001	integron_01	In0		1	GCF_900088535.1	Cyanobium sp. NIES-981
758	CYSP001.0321.00001.C001	integron_02	CALIN	5	13	GCF_900088535.1	Cyanobium sp. NIES-981
759	CYSP002.0321.00001.C001	integron_01	complete	1	5	GCF_014280235.1	Cyanobium sp. NS01
760	CYSP002.0321.00001.C001	integron_02	CALIN	2	2	GCF_014280235.1	Cyanobium sp. NS01
761	CYSP003.0321.00001.C001	integron_01	complete	1	5	GCF_000299965.1	Cycloclasticus sp. P1
762	CYSP003.0321.00001.C001	integron_02	CALIN	8	10	GCF_000299965.1	Cycloclasticus sp. P1
763	CYSP003.0321.00001.C001	integron_03	CALIN	6	11	GCF_000299965.1	Cycloclasticus sp. P1
764	CYSP004.0321.00001.C001	integron_01	CALIN	2	4	GCF_000022045.1	Cyanothece sp. PCC 7425
765	CYSP004.0321.00001.C001	integron_02	CALIN	2	3	GCF_000022045.1	Cyanothece sp. PCC 7425
766	CYSP004.0321.00001.C001	integron_03	CALIN	2	2	GCF_000022045.1	Cyanothece sp. PCC 7425
767	CYSP005.0321.00001.C001	integron_01	complete	6	9	GCF_002443175.1	Cycloclasticus sp. PY97N
768	CYSP005.0321.00001.C001	integron_02	CALIN	2	5	GCF_002443175.1	Cycloclasticus sp. PY97N
769	CYSP005.0321.00001.C001	integron_03	CALIN	3	2	GCF_002443175.1	Cycloclasticus sp. PY97N
770	CYZA001.0321.00001.C001	integron_01	complete	7	14	GCF_000442595.1	Cycloclasticus zancles 78-ME
771	CYZA001.0321.00001.C001	integron_02	CALIN	8	11	GCF_000442595.1	Cycloclasticus zancles 78-ME
772	DEAC006.0321.00001.C001	integron_01	CALIN	2	2	GCF_013423845.1	Delftia acidovorans
773	DEAL003.0321.00001.C001	integron_01	CALIN	2	2	GCF_005377625.1	Desulfoglaeba alkanexedens ALDC
774	DEAL003.0321.00001.C001	integron_02	CALIN	3	8	GCF_005377625.1	Desulfoglaeba alkanexedens ALDC
775	DEAL003.0321.00001.C001	integron_03	CALIN	3	7	GCF_005377625.1	Desulfoglaeba alkanexedens ALDC
776	DEAL004.0321.00001.C001	integron_01	In0		1	GCF_000092205.1	Desulfurivibrio alkaliphilus AHT 2
777	DEAL005.0321.00001.C001	integron_01	In0		1	GCF_009688945.1	Desulfosarcina alkanivorans
778	DEAL005.0321.00001.C001	integron_02	CALIN	2	5	GCF_009688945.1	Desulfosarcina alkanivorans
779	DEAL005.0321.00001.C001	integron_03	complete	1	3	GCF_009688945.1	Desulfosarcina alkanivorans
780	DEAR001.0321.00001.C001	integron_01	CALIN	2	3	GCF_000012425.1	Dechloromonas aromatica RCB
781	DEAR001.0321.00001.C001	integron_02	CALIN	2	3	GCF_000012425.1	Dechloromonas aromatica RCB
782	DEAR001.0321.00001.C001	integron_03	CALIN	3	4	GCF_000012425.1	Dechloromonas aromatica RCB
783	DEAR001.0321.00001.C001	integron_04	complete	4	7	GCF_000012425.1	Dechloromonas aromatica RCB
784	DEAU001.0321.00001.P002	integron_01	CALIN	5	9	GCF_000020365.1	Desulfobacterium autotrophicum HRM2
785	DEAU001.0321.00001.P002	integron_02	CALIN	2	2	GCF_000020365.1	Desulfobacterium autotrophicum HRM2
786	DEDE001.0321.00001.C001	integron_01	CALIN	3	4	GCF_000010985.1	Deferribacter desulfuricans SSM1
787	DEIN001.0321.00001.C001	integron_01	complete	1	3	GCF_000177635.2	Desulfurispirillum indicum S5
788	DEIN001.0321.00001.C001	integron_02	CALIN	2	2	GCF_000177635.2	Desulfurispirillum indicum S5
789	DEMU002.0321.00001.C001	integron_01	CALIN	2	2	GCF_001854245.1	Desulfococcus multivorans
790	DEMU002.0321.00002.C001	integron_01	CALIN	2	2	GCF_002009335.2	Desulfococcus multivorans
791	DEOE001.0321.00001.C001	integron_01	In0		1	GCF_902813185.1	Denitratisoma oestradiolicum
792	DEOL002.0321.00001.C001	integron_01	CALIN	3	4	GCF_016446285.1	Desulfobulbus oligotrophicus
793	DEOV001.0321.00001.C001	integron_01	complete	1	6	GCF_009688985.1	Desulfosarcina ovata subsp. sediminis
794	DEOV001.0321.00001.C001	integron_02	CALIN	4	7	GCF_009688985.1	Desulfosarcina ovata subsp. sediminis
795	DEOV001.0321.00001.C001	integron_03	In0		1	GCF_009688985.1	Desulfosarcina ovata subsp. sediminis
796	DEOV001.0321.00001.C001	integron_04	CALIN	3	5	GCF_009688985.1	Desulfosarcina ovata subsp. sediminis
797	DEOV001.0321.00001.C001	integron_05	CALIN	2	3	GCF_009688985.1	Desulfosarcina ovata subsp. sediminis
798	DEOV001.0321.00002.C001	integron_01	In0		1	GCF_009689005.1	Desulfosarcina ovata subsp. ovata
799	DEOV001.0321.00002.C001	integron_02	CALIN	3	3	GCF_009689005.1	Desulfosarcina ovata subsp. ovata
800	DEOV001.0321.00002.C001	integron_03	CALIN	2	6	GCF_009689005.1	Desulfosarcina ovata subsp. ovata
801	DEOV001.0321.00002.C001	integron_04	complete	1	6	GCF_009689005.1	Desulfosarcina ovata subsp. ovata
802	DEOV001.0321.00002.C001	integron_05	In0		1	GCF_009689005.1	Desulfosarcina ovata subsp. ovata
803	DEOV001.0321.00002.C001	integron_06	complete	2	5	GCF_009689005.1	Desulfosarcina ovata subsp. ovata
804	DEOV001.0321.00002.C001	integron_07	CALIN	2	5	GCF_009689005.1	Desulfosarcina ovata subsp. ovata
805	DEOV001.0321.00002.C001	integron_08	complete	1	3	GCF_009689005.1	Desulfosarcina ovata subsp. ovata
806	DEPR002.0321.00001.C001	integron_01	CALIN	4	9	GCF_000186885.1	Desulfobulbus propionicus DSM 2032
807	DEPS001.0321.00001.C001	integron_01	CALIN	2	2	GCF_000025945.1	Desulfotalea psychrophila LSv54
808	DEPS001.0321.00001.C001	integron_02	CALIN	2		GCF_000025945.1	Desulfotalea psychrophila LSv54
809	DEPS001.0321.00001.C001	integron_03	In0		1	GCF_000025945.1	Desulfotalea psychrophila LSv54
810	DEPS001.0321.00001.C001	integron_04	CALIN	3	5	GCF_000025945.1	Desulfotalea psychrophila LSv54
811	DEPS001.0321.00001.P002	integron_01	CALIN	2	2	GCF_000025945.1	Desulfotalea psychrophila LSv54
812	DERE001.0321.00001.P002	integron_01	CALIN	2	3	GCF_000024325.1	Desulfohalobium retbaense DSM 5692
813	DESO002.0321.00001.C001	integron_01	In0		1	GCF_001278055.1	Desulfuromonas soudanensis
814	DESO002.0321.00001.C001	integron_02	complete	2	7	GCF_001278055.1	Desulfuromonas soudanensis
815	DESP006.0321.00001.C001	integron_01	complete	1	5	GCF_001611275.1	Desulfuromonas sp. DDH964
816	DESP010.0321.00001.C001	integron_01	CALIN	3	1	GCF_003441615.1	Dechloromonas sp. HYN0024
817	DESP013.0321.00001.C001	integron_01	CALIN	2	2	GCF_005116675.2	Desulfopila sp. IMCC35004
818	DESP013.0321.00001.C001	integron_02	CALIN	2	3	GCF_005116675.2	Desulfopila sp. IMCC35004
819	DESP013.0321.00001.C001	integron_03	complete	1	6	GCF_005116675.2	Desulfopila sp. IMCC35004
820	DESP013.0321.00001.C001	integron_04	complete	3	10	GCF_005116675.2	Desulfopila sp. IMCC35004
821	DESP014.0321.00001.C001	integron_01	In0		1	GCF_005116655.2	Desulfopila sp. IMCC35005
822	DESP014.0321.00001.C001	integron_02	CALIN	5	8	GCF_005116655.2	Desulfopila sp. IMCC35005
823	DESP017.0321.00001.C001	integron_01	CALIN	4	5	GCF_016864195.1	Dechloromonas sp. TW-R-39-2
824	DESP017.0321.00001.C001	integron_02	CALIN	7	9	GCF_016864195.1	Dechloromonas sp. TW-R-39-2
825	DESP017.0321.00001.C001	integron_03	complete	10	8	GCF_016864195.1	Dechloromonas sp. TW-R-39-2
826	DESU003.0321.00001.C001	integron_01	complete	1	3	GCF_000341395.1	Desulfocapsa sulfexigens DSM 10523
827	DESU003.0321.00001.C001	integron_02	complete	3	5	GCF_000341395.1	Desulfocapsa sulfexigens DSM 10523
828	DETO001.0321.00001.C001	integron_01	In0		1	GCF_000307105.1	Desulfobacula toluolica Tol2
829	DETO001.0321.00001.C001	integron_02	In0		1	GCF_000307105.1	Desulfobacula toluolica Tol2
830	DETS001.0321.00002.C001	integron_01	complete	2	5	GCF_009362995.1	Delftia tsuruhatensis
831	DEWI001.0321.00001.C001	integron_01	complete	1	3	GCF_009688965.1	Desulfosarcina widdelii
832	DIPO001.0321.00001.C001	integron_01	complete	3	2	GCF_002214645.1	Diaphorobacter polyhydroxybutyrativorans
833	DIPO001.0321.00001.C001	integron_02	complete	13	14	GCF_002214645.1	Diaphorobacter polyhydroxybutyrativorans
834	DIPO001.0321.00001.C001	integron_03	CALIN	13	11	GCF_002214645.1	Diaphorobacter polyhydroxybutyrativorans
835	DIPO001.0321.00001.C001	integron_04	CALIN	5	8	GCF_002214645.1	Diaphorobacter polyhydroxybutyrativorans
836	DISP004.0321.00001.P002	integron_01	In0		1	GCF_011305995.1	Diaphorobacter sp. HDW4A
837	DISP004.0321.00001.P002	integron_02	complete	2	3	GCF_011305995.1	Diaphorobacter sp. HDW4A
838	DISP005.0321.00001.C001	integron_01	CALIN	2	6	GCF_011305535.1	Diaphorobacter sp. HDW4B
839	DISP006.0321.00001.C001	integron_01	complete	13	15	GCF_013154915.1	Diaphorobacter sp. JS3050
840	DISP006.0321.00001.C001	integron_02	CALIN	6	9	GCF_013154915.1	Diaphorobacter sp. JS3050
841	DISP007.0321.00001.C001	integron_01	complete	14	18	GCF_015832135.1	Diaphorobacter sp. JS3051
842	DISP007.0321.00001.C001	integron_02	CALIN	10	11	GCF_015832135.1	Diaphorobacter sp. JS3051
843	DOKO001.0321.00001.C001	integron_01	CALIN	3	4	GCF_001632775.1	Dokdonella koreensis DS-123
844	DYCA001.0321.00001.C001	integron_01	CALIN	6	9	GCF_016865235.1	Dyella caseinilytica
845	DYCA001.0321.00001.C001	integron_02	complete	5	5	GCF_016865235.1	Dyella caseinilytica
846	DYTH001.0321.00001.C001	integron_01	CALIN	6	6	GCF_001641285.1	Dyella thiooxydans
847	DYTH001.0321.00001.C001	integron_02	CALIN	3	3	GCF_001641285.1	Dyella thiooxydans
848	DYTH001.0321.00001.C001	integron_03	CALIN	2	1	GCF_001641285.1	Dyella thiooxydans
849	DYTH001.0321.00001.C001	integron_04	complete	2	3	GCF_001641285.1	Dyella thiooxydans
850	DYTH001.0321.00001.C001	integron_05	complete	5	6	GCF_001641285.1	Dyella thiooxydans
851	ECSP001.0321.00001.C001	integron_01	CALIN	3	4	GCF_001632845.1	Ectothiorhodospira sp. BSL-9
852	ECSP001.0321.00001.C001	integron_02	complete	5	10	GCF_001632845.1	Ectothiorhodospira sp. BSL-9
853	EDIC001.0321.00003.P002	integron_01	CALIN	2	2	GCF_016070795.1	Edwardsiella ictaluri
854	EDTA001.0321.00001.C001	integron_01	complete	3	5	GCF_001011055.1	Edwardsiella tarda
855	ENAS001.0321.00001.P003	integron_01	complete	1	3	GCF_001022095.1	Enterobacter asburiae
856	ENAS001.0321.00007.C001	integron_01	complete	2	4	GCF_011396735.1	Enterobacter asburiae
857	ENCL001.0321.00001.C001	integron_01	complete	2	4	GCF_002208095.1	Enterobacter cloacae complex sp. ECNIH7
858	ENCL001.0321.00001.C001	integron_02	complete	3	6	GCF_002208095.1	Enterobacter cloacae complex sp. ECNIH7
859	ENCL002.0321.00003.P002	integron_01	complete	4	5	GCF_900322725.1	Enterobacter cloacae complex sp.
860	ENCL002.0321.00003.P002	integron_02	complete	2	4	GCF_900322725.1	Enterobacter cloacae complex sp.
861	ENCL002.0321.00003.P002	integron_03	complete	1	3	GCF_900322725.1	Enterobacter cloacae complex sp.
862	ENCL002.0321.00003.P003	integron_01	In0		1	GCF_900322725.1	Enterobacter cloacae complex sp.
863	ENCL005.0321.00002.C001	integron_01	complete	1	3	GCF_002197345.1	Enterobacter cloacae
864	ENCL005.0321.00004.P002	integron_01	complete	1	3	GCF_002982195.1	Enterobacter cloacae
865	ENCL005.0321.00005.P003	integron_01	complete	2	4	GCF_003031445.1	Enterobacter cloacae
866	ENCL005.0321.00005.P003	integron_02	complete	1	2	GCF_003031445.1	Enterobacter cloacae
867	ENCL005.0321.00006.P002	integron_01	In0		1	GCF_003031755.1	Enterobacter cloacae
868	ENCL005.0321.00006.P002	integron_02	complete	1	3	GCF_003031755.1	Enterobacter cloacae
869	ENCL005.0321.00006.P002	integron_03	complete	1	3	GCF_003031755.1	Enterobacter cloacae
870	ENCL005.0321.00006.P003	integron_01	complete	1	3	GCF_003031755.1	Enterobacter cloacae
871	ENCL005.0321.00006.P004	integron_01	CALIN	3	3	GCF_003031755.1	Enterobacter cloacae
872	ENCL005.0321.00008.P003	integron_01	CALIN	4	5	GCF_004151605.1	Enterobacter cloacae
873	ENCL005.0321.00008.P005	integron_01	complete	1	3	GCF_004151605.1	Enterobacter cloacae
874	ENCL005.0321.00010.P003	integron_01	complete	1	3	GCF_009707405.1	Enterobacter cloacae
875	ENCL005.0321.00011.P002	integron_01	complete	2	4	GCF_012974405.1	Enterobacter cloacae
876	ENCL005.0321.00011.P002	integron_02	complete	1	3	GCF_012974405.1	Enterobacter cloacae
877	ENCL005.0321.00011.P002	integron_03	CALIN	2	3	GCF_012974405.1	Enterobacter cloacae
878	ENCL005.0321.00011.P004	integron_01	complete	4	7	GCF_012974405.1	Enterobacter cloacae
879	ENCL005.0321.00011.P004	integron_02	complete	1	3	GCF_012974405.1	Enterobacter cloacae
880	ENCL005.0321.00014.P003	integron_01	complete	3	5	GCF_014169295.1	Enterobacter cloacae
881	ENCL005.0321.00014.P004	integron_01	complete	2	4	GCF_014169295.1	Enterobacter cloacae
882	ENCL005.0321.00015.P002	integron_01	complete	2	4	GCF_014169315.1	Enterobacter cloacae
883	ENCL005.0321.00015.P002	integron_02	CALIN	2	3	GCF_014169315.1	Enterobacter cloacae
884	ENCL005.0321.00016.P002	integron_01	complete	2	5	GCF_014169635.1	Enterobacter cloacae
885	ENCL005.0321.00018.P002	integron_01	complete	2	4	GCF_015138375.1	Enterobacter cloacae
886	ENCL005.0321.00018.P002	integron_02	complete	1	3	GCF_015138375.1	Enterobacter cloacae
887	ENHO001.0321.00001.P002	integron_01	complete	1	3	GCF_001022015.1	Enterobacter hormaechei
888	ENHO001.0321.00003.P002	integron_01	complete	1	3	GCF_001022075.1	Enterobacter hormaechei
889	ENHO001.0321.00004.P002	integron_01	complete	1	3	GCF_001022255.1	Enterobacter hormaechei
890	ENHO001.0321.00005.P002	integron_01	complete	1	3	GCF_001874505.1	Enterobacter hormaechei
891	ENHO001.0321.00006.P002	integron_01	In0		1	GCF_002237465.1	Enterobacter hormaechei
892	ENHO001.0321.00006.P002	integron_02	complete	4	6	GCF_002237465.1	Enterobacter hormaechei
893	ENHO001.0321.00006.P002	integron_03	CALIN	4	5	GCF_002237465.1	Enterobacter hormaechei
894	ENHO001.0321.00007.P002	integron_01	complete	1	2	GCF_003051945.2	Enterobacter hormaechei
895	ENHO001.0321.00007.P002	integron_02	complete	1	3	GCF_003051945.2	Enterobacter hormaechei
896	ENHO001.0321.00007.P002	integron_03	complete	1	2	GCF_003051945.2	Enterobacter hormaechei
897	ENHO001.0321.00009.P002	integron_01	complete	3	5	GCF_003186415.1	Enterobacter hormaechei
898	ENHO001.0321.00010.P002	integron_01	complete	3	6	GCF_003186565.1	Enterobacter hormaechei
899	ENHO001.0321.00010.P002	integron_02	CALIN	3	4	GCF_003186565.1	Enterobacter hormaechei
900	ENHO001.0321.00011.P002	integron_01	complete	3	5	GCF_003264955.1	Enterobacter hormaechei
901	ENHO001.0321.00011.P003	integron_01	complete	2	4	GCF_003264955.1	Enterobacter hormaechei
902	ENHO001.0321.00011.P006	integron_01	complete	1	2	GCF_003264955.1	Enterobacter hormaechei
903	ENHO001.0321.00012.P002	integron_01	complete	3	5	GCF_003288475.1	Enterobacter hormaechei
904	ENHO001.0321.00012.P002	integron_02	CALIN	3	4	GCF_003288475.1	Enterobacter hormaechei
905	ENHO001.0321.00012.P002	integron_03	CALIN	2	3	GCF_003288475.1	Enterobacter hormaechei
906	ENHO001.0321.00012.P002	integron_04	CALIN	3	2	GCF_003288475.1	Enterobacter hormaechei
907	ENHO001.0321.00013.P003	integron_01	complete	4	5	GCF_003408555.1	Enterobacter hormaechei
908	ENHO001.0321.00013.P003	integron_02	complete	3	5	GCF_003408555.1	Enterobacter hormaechei
909	ENHO001.0321.00013.P005	integron_01	complete	1	2	GCF_003408555.1	Enterobacter hormaechei
910	ENHO001.0321.00013.P005	integron_02	In0		1	GCF_003408555.1	Enterobacter hormaechei
911	ENHO001.0321.00013.P005	integron_03	complete	1	3	GCF_003408555.1	Enterobacter hormaechei
912	ENHO001.0321.00013.P006	integron_01	complete	1	3	GCF_003408555.1	Enterobacter hormaechei
913	ENHO001.0321.00014.P002	integron_01	complete	1	3	GCF_003408575.1	Enterobacter hormaechei
914	ENHO001.0321.00014.P002	integron_02	complete	4	5	GCF_003408575.1	Enterobacter hormaechei
915	ENHO001.0321.00015.P002	integron_01	In0		1	GCF_003408595.1	Enterobacter hormaechei
916	ENHO001.0321.00015.P003	integron_01	complete	4	5	GCF_003408595.1	Enterobacter hormaechei
917	ENHO001.0321.00015.P003	integron_02	complete	3	5	GCF_003408595.1	Enterobacter hormaechei
918	ENHO001.0321.00016.P002	integron_01	complete	2	4	GCF_003428425.1	Enterobacter hormaechei
919	ENHO001.0321.00016.P002	integron_02	complete	1	3	GCF_003428425.1	Enterobacter hormaechei
920	ENHO001.0321.00016.P002	integron_03	CALIN	2	3	GCF_003428425.1	Enterobacter hormaechei
921	ENHO001.0321.00016.P004	integron_01	complete	1	3	GCF_003428425.1	Enterobacter hormaechei
922	ENHO001.0321.00017.P002	integron_01	complete	3	5	GCF_003444755.1	Enterobacter hormaechei
923	ENHO001.0321.00018.P002	integron_01	complete	1	2	GCF_003660125.1	Enterobacter hormaechei
924	ENHO001.0321.00019.P002	integron_01	In0		1	GCF_003965345.2	Enterobacter hormaechei
925	ENHO001.0321.00019.P002	integron_02	CALIN	3	5	GCF_003965345.2	Enterobacter hormaechei
926	ENHO001.0321.00020.P003	integron_01	In0		1	GCF_004118875.1	Enterobacter hormaechei
927	ENHO001.0321.00023.P004	integron_01	CALIN	2	3	GCF_008505035.1	Enterobacter hormaechei
928	ENHO001.0321.00025.P002	integron_01	complete	1	3	GCF_008931325.1	Enterobacter hormaechei
929	ENHO001.0321.00025.P003	integron_01	complete	4	6	GCF_008931325.1	Enterobacter hormaechei
930	ENHO001.0321.00026.P002	integron_01	In0		1	GCF_008931405.1	Enterobacter hormaechei
931	ENHO001.0321.00026.P002	integron_02	complete	1	3	GCF_008931405.1	Enterobacter hormaechei
932	ENHO001.0321.00026.P002	integron_03	CALIN	4	5	GCF_008931405.1	Enterobacter hormaechei
933	ENHO001.0321.00027.P004	integron_01	complete	4	6	GCF_008931525.1	Enterobacter hormaechei
934	ENHO001.0321.00028.P002	integron_01	complete	1	3	GCF_008931585.1	Enterobacter hormaechei
935	ENHO001.0321.00028.P003	integron_01	complete	4	6	GCF_008931585.1	Enterobacter hormaechei
936	ENHO001.0321.00029.P002	integron_01	In0		1	GCF_008931645.1	Enterobacter hormaechei
937	ENHO001.0321.00029.P002	integron_02	complete	1	2	GCF_008931645.1	Enterobacter hormaechei
938	ENHO001.0321.00029.P003	integron_01	complete	4	6	GCF_008931645.1	Enterobacter hormaechei
939	ENHO001.0321.00029.P003	integron_02	CALIN	4	5	GCF_008931645.1	Enterobacter hormaechei
940	ENHO001.0321.00030.P002	integron_01	CALIN	2	3	GCF_008931785.1	Enterobacter hormaechei
941	ENHO001.0321.00031.C001	integron_01	complete	1	3	GCF_009497055.1	Enterobacter hormaechei
942	ENHO001.0321.00031.C001	integron_02	In0		1	GCF_009497055.1	Enterobacter hormaechei
943	ENHO001.0321.00031.C001	integron_03	CALIN	2	2	GCF_009497055.1	Enterobacter hormaechei
944	ENHO001.0321.00031.C001	integron_04	In0		1	GCF_009497055.1	Enterobacter hormaechei
945	ENHO001.0321.00032.P003	integron_01	complete	1	3	GCF_009728975.1	Enterobacter hormaechei
946	ENHO001.0321.00033.P002	integron_01	complete	1	4	GCF_009738085.1	Enterobacter hormaechei
947	ENHO001.0321.00033.P002	integron_02	complete	1	2	GCF_009738085.1	Enterobacter hormaechei
948	ENHO001.0321.00035.P003	integron_01	complete	3	5	GCF_009930835.1	Enterobacter hormaechei
949	ENHO001.0321.00036.C001	integron_01	complete	3	5	GCF_009930935.1	Enterobacter hormaechei
950	ENHO001.0321.00037.P002	integron_01	In0		1	GCF_011044215.1	Enterobacter hormaechei
951	ENHO001.0321.00037.P002	integron_02	complete	1	3	GCF_011044215.1	Enterobacter hormaechei
952	ENHO001.0321.00038.P002	integron_01	complete	1	3	GCF_011045335.1	Enterobacter hormaechei
953	ENHO001.0321.00038.P002	integron_02	complete	3	2	GCF_011045335.1	Enterobacter hormaechei
954	ENHO001.0321.00038.P002	integron_03	CALIN	3	3	GCF_011045335.1	Enterobacter hormaechei
955	ENHO001.0321.00040.P002	integron_01	complete	4	5	GCF_012562255.1	Enterobacter hormaechei
956	ENHO001.0321.00040.P002	integron_02	CALIN	2	3	GCF_012562255.1	Enterobacter hormaechei
957	ENHO001.0321.00041.P003	integron_01	CALIN	3	4	GCF_012975085.1	Enterobacter hormaechei
958	ENHO001.0321.00042.P002	integron_01	complete	4	5	GCF_013046845.1	Enterobacter hormaechei
959	ENHO001.0321.00042.P002	integron_02	complete	1	3	GCF_013046845.1	Enterobacter hormaechei
960	ENHO001.0321.00053.P002	integron_01	complete	1	3	GCF_013635255.1	Enterobacter hormaechei
961	ENHO001.0321.00068.P003	integron_01	complete	4	5	GCF_013873515.1	Enterobacter hormaechei
962	ENHO001.0321.00069.P002	integron_01	complete	1	2	GCF_013873655.1	Enterobacter hormaechei
963	ENHO001.0321.00069.P002	integron_02	In0		1	GCF_013873655.1	Enterobacter hormaechei
964	ENHO001.0321.00069.P002	integron_03	complete	1	3	GCF_013873655.1	Enterobacter hormaechei
965	ENHO001.0321.00069.P004	integron_01	complete	3	5	GCF_013873655.1	Enterobacter hormaechei
966	ENHO001.0321.00070.P002	integron_01	complete	1	3	GCF_013873945.1	Enterobacter hormaechei
967	ENHO001.0321.00070.P002	integron_02	In0		1	GCF_013873945.1	Enterobacter hormaechei
968	ENHO001.0321.00070.P002	integron_03	complete	1	2	GCF_013873945.1	Enterobacter hormaechei
969	ENHO001.0321.00070.P004	integron_01	complete	3	5	GCF_013873945.1	Enterobacter hormaechei
970	ENHO001.0321.00071.P002	integron_01	complete	2	4	GCF_014117285.1	Enterobacter hormaechei
971	ENHO001.0321.00071.P002	integron_02	complete	1	3	GCF_014117285.1	Enterobacter hormaechei
972	ENHO001.0321.00071.P004	integron_01	In0		1	GCF_014117285.1	Enterobacter hormaechei
973	ENHO001.0321.00072.P002	integron_01	In0		1	GCF_014771415.1	Enterobacter hormaechei
974	ENHO001.0321.00072.P002	integron_02	complete	1	3	GCF_014771415.1	Enterobacter hormaechei
975	ENHO001.0321.00072.P002	integron_03	complete	1	2	GCF_014771415.1	Enterobacter hormaechei
976	ENHO001.0321.00073.P002	integron_01	complete	2	4	GCF_015137995.1	Enterobacter hormaechei
977	ENHO001.0321.00073.P002	integron_02	CALIN	2	3	GCF_015137995.1	Enterobacter hormaechei
978	ENHO001.0321.00074.P002	integron_01	CALIN	2	2	GCF_015238615.1	Enterobacter hormaechei
979	ENHO001.0321.00074.P002	integron_02	complete	1	3	GCF_015238615.1	Enterobacter hormaechei
980	ENHO001.0321.00075.P002	integron_01	complete	2	4	GCF_015535055.1	Enterobacter hormaechei
981	ENHO001.0321.00076.C001	integron_01	CALIN	2	2	GCF_015910205.1	Enterobacter hormaechei
982	ENHO001.0321.00076.C001	integron_02	In0		1	GCF_015910205.1	Enterobacter hormaechei
983	ENHO001.0321.00076.P003	integron_01	complete	2	4	GCF_015910205.1	Enterobacter hormaechei
984	ENHO001.0321.00078.P002	integron_01	complete	1	3	GCF_015910265.1	Enterobacter hormaechei
985	ENHO001.0321.00078.P002	integron_02	In0		1	GCF_015910265.1	Enterobacter hormaechei
986	ENHO001.0321.00078.P002	integron_03	complete	3	5	GCF_015910265.1	Enterobacter hormaechei
987	ENHO001.0321.00078.P003	integron_01	complete	2	4	GCF_015910265.1	Enterobacter hormaechei
988	ENHO001.0321.00079.P002	integron_01	In0		1	GCF_015910285.1	Enterobacter hormaechei
989	ENHO001.0321.00079.P002	integron_02	CALIN	2	3	GCF_015910285.1	Enterobacter hormaechei
990	ENHO001.0321.00079.P004	integron_01	complete	2	4	GCF_015910285.1	Enterobacter hormaechei
991	ENHO001.0321.00079.P005	integron_01	complete	1	3	GCF_015910285.1	Enterobacter hormaechei
992	ENHO001.0321.00079.P006	integron_01	complete	2	4	GCF_015910285.1	Enterobacter hormaechei
993	ENHO001.0321.00080.P002	integron_01	In0		1	GCF_015910325.1	Enterobacter hormaechei
994	ENHO001.0321.00080.P003	integron_01	complete	2	4	GCF_015910325.1	Enterobacter hormaechei
995	ENHO001.0321.00080.P004	integron_01	complete	3	6	GCF_015910325.1	Enterobacter hormaechei
996	ENHO001.0321.00081.P002	integron_01	In0		1	GCF_015910345.1	Enterobacter hormaechei
997	ENHO001.0321.00081.P003	integron_01	complete	2	4	GCF_015910345.1	Enterobacter hormaechei
998	ENHO001.0321.00081.P004	integron_01	complete	3	6	GCF_015910345.1	Enterobacter hormaechei
999	ENHO001.0321.00082.C001	integron_01	In0		1	GCF_015910365.1	Enterobacter hormaechei
1000	ENHO001.0321.00082.P002	integron_01	complete	2	4	GCF_015910365.1	Enterobacter hormaechei
1001	ENHO001.0321.00082.P003	integron_01	complete	1	3	GCF_015910365.1	Enterobacter hormaechei
1002	ENHO001.0321.00082.P004	integron_01	complete	2	4	GCF_015910365.1	Enterobacter hormaechei
1003	ENHO001.0321.00083.P002	integron_01	complete	1	3	GCF_015910385.1	Enterobacter hormaechei
1004	ENHO001.0321.00083.P002	integron_02	CALIN	2	2	GCF_015910385.1	Enterobacter hormaechei
1005	ENHO001.0321.00083.P002	integron_03	complete	2	4	GCF_015910385.1	Enterobacter hormaechei
1006	ENHO001.0321.00084.P002	integron_01	CALIN	4	5	GCF_016126855.1	Enterobacter hormaechei
1007	ENHO001.0321.00086.P002	integron_01	complete	1	3	GCF_016745355.1	Enterobacter hormaechei
1008	ENHO001.0321.00086.P002	integron_02	In0		1	GCF_016745355.1	Enterobacter hormaechei
1009	ENHO001.0321.00087.P002	integron_01	complete	1	2	GCF_016767735.1	Enterobacter hormaechei
1010	ENHO001.0321.00087.P002	integron_02	In0		1	GCF_016767735.1	Enterobacter hormaechei
1011	ENHO001.0321.00087.P002	integron_03	complete	1	3	GCF_016767735.1	Enterobacter hormaechei
1012	ENHO001.0321.00093.P002	integron_01	complete	2	4	GCF_017161605.1	Enterobacter hormaechei
1013	ENHO001.0321.00094.P002	integron_01	complete	2	4	GCF_017161725.1	Enterobacter hormaechei
1014	ENHO001.0321.00095.P002	integron_01	complete	2	4	GCF_017161745.1	Enterobacter hormaechei
1015	ENHO001.0321.00096.P002	integron_01	complete	3	7	GCF_017161765.1	Enterobacter hormaechei
1016	ENHO001.0321.00096.P002	integron_02	complete	3	5	GCF_017161765.1	Enterobacter hormaechei
1017	ENHO001.0321.00097.P002	integron_01	complete	2	4	GCF_017161785.1	Enterobacter hormaechei
1018	ENHO001.0321.00098.P002	integron_01	complete	2	4	GCF_017161805.1	Enterobacter hormaechei
1019	ENHO001.0321.00099.P002	integron_01	complete	2	4	GCF_017161825.1	Enterobacter hormaechei
1020	ENHO001.0321.00100.P002	integron_01	complete	2	4	GCF_017161845.1	Enterobacter hormaechei
1021	ENHO001.0321.00101.P002	integron_01	complete	2	4	GCF_017161865.1	Enterobacter hormaechei
1022	ENHO001.0321.00102.C001	integron_01	complete	4	6	GCF_900497145.1	Enterobacter hormaechei
1023	ENHO001.0321.00102.P002	integron_01	complete	2	4	GCF_900497145.1	Enterobacter hormaechei
1024	ENHO001.0321.00104.P002	integron_01	complete	1	3	GCF_000807425.2	Enterobacter hormaechei subsp. steigerwaltii
1025	ENHO001.0321.00104.P002	integron_02	CALIN	4	5	GCF_000807425.2	Enterobacter hormaechei subsp. steigerwaltii
1026	ENHO001.0321.00104.P003	integron_01	complete	1	3	GCF_000807425.2	Enterobacter hormaechei subsp. steigerwaltii
1027	ENHO001.0321.00105.P002	integron_01	In0		1	GCF_000814125.3	Enterobacter hormaechei subsp. steigerwaltii
1028	ENHO001.0321.00105.P002	integron_02	complete	1	3	GCF_000814125.3	Enterobacter hormaechei subsp. steigerwaltii
1029	ENHO001.0321.00105.P002	integron_03	complete	1	2	GCF_000814125.3	Enterobacter hormaechei subsp. steigerwaltii
1030	ENHO001.0321.00107.P002	integron_01	complete	4	5	GCF_007556795.1	Enterobacter hormaechei subsp. steigerwaltii
1031	ENHO001.0321.00107.P002	integron_02	CALIN	4	5	GCF_007556795.1	Enterobacter hormaechei subsp. steigerwaltii
1032	ENHO001.0321.00108.P002	integron_01	complete	2	4	GCF_015535675.1	Enterobacter hormaechei subsp. steigerwaltii
1033	ENHO001.0321.00108.P004	integron_01	complete	8	10	GCF_015535675.1	Enterobacter hormaechei subsp. steigerwaltii
1034	ENHO001.0321.00109.P002	integron_01	complete	4	5	GCF_900322715.1	Enterobacter hormaechei subsp. steigerwaltii
1035	ENHO001.0321.00111.P003	integron_01	complete	2	4	GCF_000814205.1	Enterobacter hormaechei subsp. hormaechei
1036	ENHO001.0321.00112.P002	integron_01	CALIN	2	3	GCF_000807405.2	Enterobacter hormaechei subsp. xiangfangensis
1037	ENHO001.0321.00116.P002	integron_01	complete	3	5	GCF_003382725.1	Enterobacter hormaechei subsp. xiangfangensis
1038	ENHO001.0321.00117.P002	integron_01	complete	3	5	GCF_003586025.1	Enterobacter hormaechei subsp. xiangfangensis
1039	ENHO001.0321.00118.C001	integron_01	CALIN	2	2	GCF_003964795.2	Enterobacter hormaechei subsp. xiangfangensis
1040	ENHO001.0321.00118.C001	integron_02	In0		1	GCF_003964795.2	Enterobacter hormaechei subsp. xiangfangensis
1041	ENHO001.0321.00119.P003	integron_01	complete	2	4	GCF_014931695.1	Enterobacter hormaechei subsp. xiangfangensis
1042	ENHO001.0321.00120.P004	integron_01	complete	1	3	GCF_000750275.1	Enterobacter hormaechei subsp. hoffmannii ECR091
1043	ENHO001.0321.00121.P005	integron_01	complete	1	3	GCF_000750225.1	Enterobacter hormaechei subsp. hoffmannii ECNIH3
1044	ENHO001.0321.00123.P002	integron_01	complete	1	2	GCF_002968455.1	Enterobacter hormaechei subsp. hoffmannii
1045	ENHO001.0321.00123.P002	integron_02	complete	1	3	GCF_002968455.1	Enterobacter hormaechei subsp. hoffmannii
1046	ENHO001.0321.00123.P002	integron_03	In0		1	GCF_002968455.1	Enterobacter hormaechei subsp. hoffmannii
1047	ENHO001.0321.00124.P002	integron_01	complete	2	4	GCF_009834325.1	Enterobacter hormaechei subsp. hoffmannii
1048	ENHO001.0321.00124.P002	integron_02	CALIN	4	4	GCF_009834325.1	Enterobacter hormaechei subsp. hoffmannii
1049	ENHO001.0321.00125.P002	integron_01	complete	2	4	GCF_010319625.1	Enterobacter hormaechei subsp. hoffmannii
1050	ENHO001.0321.00125.P003	integron_01	complete	1	3	GCF_010319625.1	Enterobacter hormaechei subsp. hoffmannii
1051	ENKO001.0321.00003.P002	integron_01	complete	1	3	GCF_003665375.1	Enterobacter kobei
1052	ENKO001.0321.00004.P004	integron_01	CALIN	2	3	GCF_008365235.1	Enterobacter kobei
1053	ENKO001.0321.00005.P003	integron_01	complete	4	6	GCF_008931545.1	Enterobacter kobei
1054	ENKO001.0321.00005.P004	integron_01	complete	1	3	GCF_008931545.1	Enterobacter kobei
1055	ENKO001.0321.00006.P004	integron_01	complete	5	6	GCF_011604705.1	Enterobacter kobei
1056	ENKO001.0321.00007.P002	integron_01	complete	4	7	GCF_014041955.1	Enterobacter kobei
1057	ENKO001.0321.00007.P002	integron_02	CALIN	4	5	GCF_014041955.1	Enterobacter kobei
1058	ENKO001.0321.00008.P003	integron_01	complete	5	7	GCF_015135595.1	Enterobacter kobei
1059	ENKO001.0321.00008.P005	integron_01	complete	6	8	GCF_015135595.1	Enterobacter kobei
1060	ENKO001.0321.00009.P004	integron_01	complete	1	3	GCF_015135855.1	Enterobacter kobei
1061	ENKO001.0321.00011.P004	integron_01	complete	2	4	GCF_015137465.1	Enterobacter kobei
1062	ENOF001.0321.00001.C001	integron_01	CALIN	2	5	GCF_001547755.1	endosymbiont of Bathymodiolus septemdierum str. Myojin knoll
1063	ENOF001.0321.00001.C001	integron_02	complete	1	4	GCF_001547755.1	endosymbiont of Bathymodiolus septemdierum str. Myojin knoll
1064	ENOF002.0321.00001.C001	integron_01	CALIN	2	1	GCF_000801295.1	endosymbiont of unidentified scaly snail isolate Monju
1065	ENOF002.0321.00001.C001	integron_02	CALIN	2	5	GCF_000801295.1	endosymbiont of unidentified scaly snail isolate Monju
1066	ENRO001.0321.00017.P002	integron_01	complete	1	3	GCF_014490845.1	Enterobacter roggenkampii
1067	ENRO001.0321.00019.P003	integron_01	complete	2	4	GCF_015136315.1	Enterobacter roggenkampii
1068	ENRO001.0321.00020.P002	integron_01	CALIN	2	3	GCF_016756655.1	Enterobacter roggenkampii
1069	ENRO001.0321.00020.P002	integron_02	CALIN	2	2	GCF_016756655.1	Enterobacter roggenkampii
1070	ENRO001.0321.00020.P004	integron_01	CALIN	5	7	GCF_016756655.1	Enterobacter roggenkampii
1071	ENRO001.0321.00020.P004	integron_02	complete	4	6	GCF_016756655.1	Enterobacter roggenkampii
1072	ENSP008.0321.00001.C001	integron_01	complete	1	3	GCF_002787395.1	Enterobacter sp. CRENT-193
1073	ENSP008.0321.00001.C001	integron_02	In0		1	GCF_002787395.1	Enterobacter sp. CRENT-193
1074	ENSP008.0321.00001.P002	integron_01	complete	1	3	GCF_002787395.1	Enterobacter sp. CRENT-193
1075	ENSP008.0321.00001.P002	integron_02	CALIN	2	2	GCF_002787395.1	Enterobacter sp. CRENT-193
1076	ENSP008.0321.00001.P002	integron_03	complete	1	2	GCF_002787395.1	Enterobacter sp. CRENT-193
1077	ENSP015.0321.00001.P003	integron_01	complete	4	6	GCF_008931465.1	Enterobacter sp. E76
1078	ENSP018.0321.00001.C001	integron_01	In0		1	GCF_013749735.1	Enterobacter sp. RHBSTW-00422
1079	EPCI001.0321.00001.C001	integron_01	complete	1	3	GCF_003339525.1	Ephemeroptericola cinctiostellae
1080	ESAL001.0321.00004.P002	integron_01	complete	1	3	GCF_002741375.1	Escherichia albertii
1081	ESAL001.0321.00007.P002	integron_01	complete	2	3	GCF_003312485.2	Escherichia albertii
1082	ESCO001.0321.00007.P002	integron_01	CALIN	2	3	GCF_000784925.1	Escherichia coli
1083	ESCO001.0321.00007.P003	integron_01	complete	1	3	GCF_000784925.1	Escherichia coli
1084	ESCO001.0321.00007.P003	integron_02	CALIN	2	3	GCF_000784925.1	Escherichia coli
1085	ESCO001.0321.00010.P002	integron_01	complete	2	4	GCF_000814145.2	Escherichia coli
1086	ESCO001.0321.00010.P003	integron_01	complete	1	3	GCF_000814145.2	Escherichia coli
1087	ESCO001.0321.00011.C001	integron_01	complete	1	3	GCF_000819645.1	Escherichia coli
1088	ESCO001.0321.00015.P003	integron_01	CALIN	2	3	GCF_000931565.1	Escherichia coli
1089	ESCO001.0321.00018.C001	integron_01	complete	1	3	GCF_000967155.2	Escherichia coli
1090	ESCO001.0321.00033.P002	integron_01	complete	1	3	GCF_001280325.1	Escherichia coli
1091	ESCO001.0321.00034.P002	integron_01	complete	1	2	GCF_001280345.1	Escherichia coli
1092	ESCO001.0321.00036.P002	integron_01	complete	3	5	GCF_001280405.1	Escherichia coli
1093	ESCO001.0321.00040.C001	integron_01	complete	2	4	GCF_001420955.1	Escherichia coli
1094	ESCO001.0321.00042.P002	integron_01	CALIN	2	2	GCF_001469815.1	Escherichia coli
1095	ESCO001.0321.00042.P002	integron_02	complete	2	4	GCF_001469815.1	Escherichia coli
1096	ESCO001.0321.00043.P002	integron_01	CALIN	2	3	GCF_001485455.1	Escherichia coli
1097	ESCO001.0321.00044.P002	integron_01	CALIN	2	3	GCF_001513615.1	Escherichia coli
1098	ESCO001.0321.00045.P002	integron_01	CALIN	2	2	GCF_001513635.1	Escherichia coli
1099	ESCO001.0321.00048.P002	integron_01	complete	1	3	GCF_001566635.1	Escherichia coli
1100	ESCO001.0321.00049.P002	integron_01	CALIN	2	3	GCF_001566675.1	Escherichia coli
1101	ESCO001.0321.00049.P002	integron_02	CALIN	2	3	GCF_001566675.1	Escherichia coli
1102	ESCO001.0321.00049.P002	integron_03	CALIN	2	3	GCF_001566675.1	Escherichia coli
1103	ESCO001.0321.00049.P002	integron_04	CALIN	2	1	GCF_001566675.1	Escherichia coli
1104	ESCO001.0321.00050.P003	integron_01	complete	1	3	GCF_001577325.1	Escherichia coli
1105	ESCO001.0321.00053.P002	integron_01	complete	5	7	GCF_001617565.1	Escherichia coli
1106	ESCO001.0321.00053.P002	integron_02	complete	2	4	GCF_001617565.1	Escherichia coli
1107	ESCO001.0321.00053.P003	integron_01	CALIN	2	3	GCF_001617565.1	Escherichia coli
1108	ESCO001.0321.00056.P003	integron_01	CALIN	2	3	GCF_001618365.1	Escherichia coli
1109	ESCO001.0321.00056.P003	integron_02	complete	1	3	GCF_001618365.1	Escherichia coli
1110	ESCO001.0321.00058.C001	integron_01	CALIN	3	4	GCF_001644745.1	Escherichia coli
1111	ESCO001.0321.00063.P002	integron_01	CALIN	2	3	GCF_001663475.1	Escherichia coli
1112	ESCO001.0321.00071.C001	integron_01	CALIN	2	2	GCF_001682305.2	Escherichia coli
1113	ESCO001.0321.00072.C001	integron_01	CALIN	2	2	GCF_001683435.1	Escherichia coli
1114	ESCO001.0321.00074.C001	integron_01	complete	2	4	GCF_001693635.1	Escherichia coli
1115	ESCO001.0321.00077.P002	integron_01	complete	1	3	GCF_001721525.1	Escherichia coli
1116	ESCO001.0321.00077.P003	integron_01	CALIN	2	3	GCF_001721525.1	Escherichia coli
1117	ESCO001.0321.00083.C001	integron_01	CALIN	2	2	GCF_001860505.1	Escherichia coli
1118	ESCO001.0321.00083.C001	integron_02	CALIN	2	2	GCF_001860505.1	Escherichia coli
1119	ESCO001.0321.00083.C001	integron_03	complete	3	5	GCF_001860505.1	Escherichia coli
1120	ESCO001.0321.00085.P003	integron_01	complete	6	7	GCF_001886535.1	Escherichia coli
1121	ESCO001.0321.00086.P003	integron_01	complete	6	7	GCF_001886555.1	Escherichia coli
1122	ESCO001.0321.00087.P003	integron_01	complete	6	7	GCF_001886575.1	Escherichia coli
1123	ESCO001.0321.00088.P003	integron_01	complete	6	7	GCF_001886755.1	Escherichia coli
1124	ESCO001.0321.00100.P002	integron_01	complete	1	3	GCF_001890365.1	Escherichia coli
1125	ESCO001.0321.00105.C001	integron_01	CALIN	2	2	GCF_001900375.1	Escherichia coli
1126	ESCO001.0321.00117.P002	integron_01	complete	2	4	GCF_001900615.1	Escherichia coli
1127	ESCO001.0321.00118.P002	integron_01	complete	2	4	GCF_001900635.1	Escherichia coli
1128	ESCO001.0321.00119.C001	integron_01	CALIN	6	6	GCF_001900655.1	Escherichia coli
1129	ESCO001.0321.00120.P002	integron_01	complete	1	2	GCF_001900675.1	Escherichia coli
1130	ESCO001.0321.00121.P002	integron_01	complete	2	4	GCF_001900695.1	Escherichia coli
1131	ESCO001.0321.00121.P002	integron_02	complete	6	7	GCF_001900695.1	Escherichia coli
1132	ESCO001.0321.00122.P003	integron_01	CALIN	6	6	GCF_001900715.1	Escherichia coli
1133	ESCO001.0321.00125.P002	integron_01	CALIN	8	10	GCF_001900795.1	Escherichia coli
1134	ESCO001.0321.00126.P002	integron_01	CALIN	4	6	GCF_001900815.1	Escherichia coli
1135	ESCO001.0321.00127.P002	integron_01	complete	2	4	GCF_001900835.1	Escherichia coli
1136	ESCO001.0321.00146.P002	integron_01	complete	3	5	GCF_001901365.1	Escherichia coli
1137	ESCO001.0321.00149.P002	integron_01	complete	1	3	GCF_001901445.1	Escherichia coli
1138	ESCO001.0321.00152.P002	integron_01	complete	6	7	GCF_001936315.1	Escherichia coli
1139	ESCO001.0321.00153.C001	integron_01	In0		1	GCF_001969285.3	Escherichia coli
1140	ESCO001.0321.00153.P002	integron_01	complete	6	7	GCF_001969285.3	Escherichia coli
1141	ESCO001.0321.00154.C001	integron_01	complete	3	5	GCF_001971765.1	Escherichia coli
1142	ESCO001.0321.00154.P002	integron_01	complete	3	5	GCF_001971765.1	Escherichia coli
1143	ESCO001.0321.00154.P002	integron_02	complete	6	7	GCF_001971765.1	Escherichia coli
1144	ESCO001.0321.00157.P002	integron_01	CALIN	3	4	GCF_002009315.1	Escherichia coli
1145	ESCO001.0321.00158.P004	integron_01	complete	3	6	GCF_002011945.1	Escherichia coli
1146	ESCO001.0321.00160.P002	integron_01	complete	2	4	GCF_002011985.1	Escherichia coli
1147	ESCO001.0321.00160.P004	integron_01	complete	2	4	GCF_002011985.1	Escherichia coli
1148	ESCO001.0321.00161.P002	integron_01	CALIN	2	2	GCF_002012005.1	Escherichia coli
1149	ESCO001.0321.00161.P002	integron_02	complete	2	4	GCF_002012005.1	Escherichia coli
1150	ESCO001.0321.00163.P003	integron_01	CALIN	3	3	GCF_002012045.1	Escherichia coli
1151	ESCO001.0321.00164.P003	integron_01	complete	1	3	GCF_002012065.1	Escherichia coli
1152	ESCO001.0321.00165.C001	integron_01	CALIN	2	2	GCF_002012085.1	Escherichia coli
1153	ESCO001.0321.00165.P002	integron_01	complete	2	4	GCF_002012085.1	Escherichia coli
1154	ESCO001.0321.00166.P002	integron_01	complete	1	3	GCF_002012105.1	Escherichia coli
1155	ESCO001.0321.00167.P002	integron_01	complete	1	3	GCF_002012125.1	Escherichia coli
1156	ESCO001.0321.00168.P003	integron_01	complete	3	6	GCF_002012145.1	Escherichia coli
1157	ESCO001.0321.00169.P002	integron_01	complete	2	4	GCF_002012165.1	Escherichia coli
1158	ESCO001.0321.00170.P002	integron_01	CALIN	2	3	GCF_002012205.1	Escherichia coli
1159	ESCO001.0321.00171.C001	integron_01	CALIN	2	2	GCF_002012225.1	Escherichia coli
1160	ESCO001.0321.00171.P002	integron_01	CALIN	2	3	GCF_002012225.1	Escherichia coli
1161	ESCO001.0321.00171.P004	integron_01	complete	3	6	GCF_002012225.1	Escherichia coli
1162	ESCO001.0321.00172.P002	integron_01	complete	1	3	GCF_002012245.1	Escherichia coli
1163	ESCO001.0321.00172.P003	integron_01	CALIN	2	3	GCF_002012245.1	Escherichia coli
1164	ESCO001.0321.00173.P002	integron_01	CALIN	2	3	GCF_002012265.1	Escherichia coli
1165	ESCO001.0321.00174.P004	integron_01	complete	6	7	GCF_002012305.1	Escherichia coli
1166	ESCO001.0321.00176.C001	integron_01	complete	4	5	GCF_002055635.1	Escherichia coli
1167	ESCO001.0321.00176.P002	integron_01	complete	1	3	GCF_002055635.1	Escherichia coli
1168	ESCO001.0321.00177.P002	integron_01	CALIN	2	3	GCF_002056065.1	Escherichia coli
1169	ESCO001.0321.00177.P002	integron_02	complete	1	3	GCF_002056065.1	Escherichia coli
1170	ESCO001.0321.00177.P003	integron_01	CALIN	3	4	GCF_002056065.1	Escherichia coli
1171	ESCO001.0321.00178.P002	integron_01	complete	1	3	GCF_002056145.1	Escherichia coli
1172	ESCO001.0321.00179.P003	integron_01	CALIN	2	3	GCF_002056635.1	Escherichia coli
1173	ESCO001.0321.00179.P004	integron_01	complete	1	3	GCF_002056635.1	Escherichia coli
1174	ESCO001.0321.00183.P002	integron_01	complete	2	4	GCF_002077195.1	Escherichia coli
1175	ESCO001.0321.00185.C001	integron_01	CALIN	2	3	GCF_002105735.1	Escherichia coli
1176	ESCO001.0321.00186.P002	integron_01	In0		1	GCF_002116715.2	Escherichia coli
1177	ESCO001.0321.00188.P002	integron_01	CALIN	2	2	GCF_002142675.1	Escherichia coli
1178	ESCO001.0321.00188.P003	integron_01	complete	1	3	GCF_002142675.1	Escherichia coli
1179	ESCO001.0321.00189.P002	integron_01	complete	3	5	GCF_002142695.1	Escherichia coli
1180	ESCO001.0321.00193.P002	integron_01	CALIN	2	3	GCF_002157245.1	Escherichia coli
1181	ESCO001.0321.00197.P002	integron_01	complete	2	4	GCF_002163955.1	Escherichia coli
1182	ESCO001.0321.00198.P002	integron_01	CALIN	2	2	GCF_002164595.2	Escherichia coli
1183	ESCO001.0321.00198.P002	integron_02	complete	2	4	GCF_002164595.2	Escherichia coli
1184	ESCO001.0321.00199.P002	integron_01	complete	2	4	GCF_002164635.4	Escherichia coli
1185	ESCO001.0321.00199.P002	integron_02	CALIN	2	2	GCF_002164635.4	Escherichia coli
1186	ESCO001.0321.00200.P002	integron_01	complete	2	4	GCF_002164645.3	Escherichia coli
1187	ESCO001.0321.00200.P002	integron_02	CALIN	2	2	GCF_002164645.3	Escherichia coli
1188	ESCO001.0321.00201.P003	integron_01	CALIN	2	3	GCF_002164865.2	Escherichia coli
1189	ESCO001.0321.00202.P002	integron_01	complete	2	4	GCF_002164975.2	Escherichia coli
1190	ESCO001.0321.00202.P002	integron_02	CALIN	2	2	GCF_002164975.2	Escherichia coli
1191	ESCO001.0321.00203.P002	integron_01	complete	3	6	GCF_002165095.2	Escherichia coli
1192	ESCO001.0321.00204.P002	integron_01	CALIN	2	2	GCF_002165115.2	Escherichia coli
1193	ESCO001.0321.00206.C001	integron_01	complete	4	5	GCF_002180095.1	Escherichia coli
1194	ESCO001.0321.00206.P002	integron_01	complete	1	3	GCF_002180095.1	Escherichia coli
1195	ESCO001.0321.00206.P004	integron_01	CALIN	3	3	GCF_002180095.1	Escherichia coli
1196	ESCO001.0321.00206.P004	integron_02	CALIN	3	4	GCF_002180095.1	Escherichia coli
1197	ESCO001.0321.00208.P002	integron_01	CALIN	2	3	GCF_002180195.1	Escherichia coli
1198	ESCO001.0321.00210.C001	integron_01	complete	4	5	GCF_002180275.1	Escherichia coli
1199	ESCO001.0321.00210.P003	integron_01	complete	1	3	GCF_002180275.1	Escherichia coli
1200	ESCO001.0321.00211.P002	integron_01	CALIN	3	4	GCF_002192275.1	Escherichia coli
1201	ESCO001.0321.00211.P003	integron_01	complete	1	3	GCF_002192275.1	Escherichia coli
1202	ESCO001.0321.00212.P002	integron_01	complete	2	4	GCF_002192295.1	Escherichia coli
1203	ESCO001.0321.00213.P002	integron_01	CALIN	2	3	GCF_002193095.1	Escherichia coli
1204	ESCO001.0321.00214.C001	integron_01	complete	1	2	GCF_002196475.1	Escherichia coli
1205	ESCO001.0321.00214.C001	integron_02	CALIN	2	2	GCF_002196475.1	Escherichia coli
1206	ESCO001.0321.00214.C001	integron_03	CALIN	4	5	GCF_002196475.1	Escherichia coli
1207	ESCO001.0321.00214.P002	integron_01	complete	1	2	GCF_002196475.1	Escherichia coli
1208	ESCO001.0321.00214.P003	integron_01	complete	3	5	GCF_002196475.1	Escherichia coli
1209	ESCO001.0321.00214.P004	integron_01	CALIN	2	3	GCF_002196475.1	Escherichia coli
1210	ESCO001.0321.00214.P004	integron_02	CALIN	3	3	GCF_002196475.1	Escherichia coli
1211	ESCO001.0321.00215.C001	integron_01	CALIN	4	5	GCF_002196495.1	Escherichia coli
1212	ESCO001.0321.00215.C001	integron_02	CALIN	2	2	GCF_002196495.1	Escherichia coli
1213	ESCO001.0321.00215.C001	integron_03	complete	1	2	GCF_002196495.1	Escherichia coli
1214	ESCO001.0321.00215.P002	integron_01	complete	1	2	GCF_002196495.1	Escherichia coli
1215	ESCO001.0321.00215.P003	integron_01	complete	3	5	GCF_002196495.1	Escherichia coli
1216	ESCO001.0321.00215.P004	integron_01	CALIN	2	3	GCF_002196495.1	Escherichia coli
1217	ESCO001.0321.00215.P004	integron_02	CALIN	3	3	GCF_002196495.1	Escherichia coli
1218	ESCO001.0321.00216.P002	integron_01	CALIN	2	2	GCF_002201835.1	Escherichia coli
1219	ESCO001.0321.00216.P002	integron_02	complete	2	4	GCF_002201835.1	Escherichia coli
1220	ESCO001.0321.00216.P003	integron_01	CALIN	2	3	GCF_002201835.1	Escherichia coli
1221	ESCO001.0321.00217.P002	integron_01	complete	2	4	GCF_002202175.1	Escherichia coli
1222	ESCO001.0321.00217.P002	integron_02	complete	2	4	GCF_002202175.1	Escherichia coli
1223	ESCO001.0321.00217.P002	integron_03	CALIN	2	2	GCF_002202175.1	Escherichia coli
1224	ESCO001.0321.00217.P002	integron_04	complete	2	4	GCF_002202175.1	Escherichia coli
1225	ESCO001.0321.00217.P002	integron_05	complete	2	4	GCF_002202175.1	Escherichia coli
1226	ESCO001.0321.00217.P003	integron_01	complete	1	3	GCF_002202175.1	Escherichia coli
1227	ESCO001.0321.00218.P003	integron_01	complete	2	4	GCF_002211725.1	Escherichia coli
1228	ESCO001.0321.00219.P002	integron_01	complete	3	4	GCF_002214205.1	Escherichia coli
1229	ESCO001.0321.00219.P003	integron_01	In0		1	GCF_002214205.1	Escherichia coli
1230	ESCO001.0321.00226.P003	integron_01	CALIN	2	3	GCF_002246595.2	Escherichia coli
1231	ESCO001.0321.00226.P003	integron_02	CALIN	6	6	GCF_002246595.2	Escherichia coli
1232	ESCO001.0321.00228.P002	integron_01	complete	6	7	GCF_002278115.2	Escherichia coli
1233	ESCO001.0321.00228.P004	integron_01	complete	1	2	GCF_002278115.2	Escherichia coli
1234	ESCO001.0321.00229.P002	integron_01	complete	1	3	GCF_002285755.1	Escherichia coli
1235	ESCO001.0321.00232.P004	integron_01	complete	2	3	GCF_002310555.1	Escherichia coli
1236	ESCO001.0321.00234.P002	integron_01	complete	1	3	GCF_002310595.1	Escherichia coli
1237	ESCO001.0321.00238.P002	integron_01	CALIN	2	3	GCF_002310675.1	Escherichia coli
1238	ESCO001.0321.00238.P005	integron_01	CALIN	2	2	GCF_002310675.1	Escherichia coli
1239	ESCO001.0321.00240.C001	integron_01	complete	2	4	GCF_002310715.1	Escherichia coli
1240	ESCO001.0321.00242.P002	integron_01	In0		1	GCF_002357875.1	Escherichia coli
1241	ESCO001.0321.00243.P002	integron_01	In0		1	GCF_002357895.1	Escherichia coli
1242	ESCO001.0321.00245.C001	integron_01	complete	1	3	GCF_002393365.1	Escherichia coli
1243	ESCO001.0321.00246.C001	integron_01	complete	1	3	GCF_002393465.1	Escherichia coli
1244	ESCO001.0321.00248.P002	integron_01	complete	2	4	GCF_002587005.1	Escherichia coli
1245	ESCO001.0321.00249.P002	integron_01	CALIN	2	2	GCF_002589795.1	Escherichia coli
1246	ESCO001.0321.00249.P003	integron_01	CALIN	3	4	GCF_002589795.1	Escherichia coli
1247	ESCO001.0321.00250.P002	integron_01	CALIN	3	4	GCF_002591135.1	Escherichia coli
1248	ESCO001.0321.00253.P002	integron_01	complete	1	3	GCF_002741355.1	Escherichia coli
1249	ESCO001.0321.00257.P002	integron_01	complete	1	3	GCF_002763515.2	Escherichia coli
1250	ESCO001.0321.00258.P002	integron_01	complete	2	4	GCF_002763995.1	Escherichia coli
1251	ESCO001.0321.00259.P002	integron_01	complete	2	4	GCF_002764015.1	Escherichia coli
1252	ESCO001.0321.00260.P002	integron_01	complete	2	4	GCF_002786655.1	Escherichia coli
1253	ESCO001.0321.00261.P002	integron_01	CALIN	2	3	GCF_002787215.1	Escherichia coli
1254	ESCO001.0321.00261.P002	integron_02	CALIN	2	3	GCF_002787215.1	Escherichia coli
1255	ESCO001.0321.00262.P002	integron_01	CALIN	2	2	GCF_002787315.1	Escherichia coli
1256	ESCO001.0321.00263.P002	integron_01	complete	2	4	GCF_002787545.1	Escherichia coli
1257	ESCO001.0321.00264.P002	integron_01	In0		1	GCF_002787645.1	Escherichia coli
1258	ESCO001.0321.00265.C001	integron_01	In0		1	GCF_002787935.1	Escherichia coli
1259	ESCO001.0321.00266.P002	integron_01	CALIN	2	3	GCF_002788115.1	Escherichia coli
1260	ESCO001.0321.00266.P002	integron_02	CALIN	2	3	GCF_002788115.1	Escherichia coli
1261	ESCO001.0321.00266.P002	integron_03	CALIN	2	2	GCF_002788115.1	Escherichia coli
1262	ESCO001.0321.00267.P002	integron_01	CALIN	2	2	GCF_002788295.1	Escherichia coli
1263	ESCO001.0321.00271.P002	integron_01	complete	2	4	GCF_002803905.1	Escherichia coli
1264	ESCO001.0321.00271.P002	integron_02	CALIN	3	4	GCF_002803905.1	Escherichia coli
1265	ESCO001.0321.00271.P002	integron_03	CALIN	2	2	GCF_002803905.1	Escherichia coli
1266	ESCO001.0321.00272.P002	integron_01	CALIN	2	3	GCF_002811555.3	Escherichia coli
1267	ESCO001.0321.00272.P004	integron_01	complete	3	6	GCF_002811555.3	Escherichia coli
1268	ESCO001.0321.00272.P004	integron_02	In0		1	GCF_002811555.3	Escherichia coli
1269	ESCO001.0321.00275.C001	integron_01	CALIN	3	4	GCF_002846135.1	Escherichia coli
1270	ESCO001.0321.00275.P002	integron_01	CALIN	3	3	GCF_002846135.1	Escherichia coli
1271	ESCO001.0321.00275.P002	integron_02	complete	1	2	GCF_002846135.1	Escherichia coli
1272	ESCO001.0321.00277.P002	integron_01	CALIN	4	6	GCF_002850675.4	Escherichia coli
1273	ESCO001.0321.00278.P003	integron_01	complete	3	4	GCF_002853655.1	Escherichia coli
1274	ESCO001.0321.00278.P003	integron_02	In0		1	GCF_002853655.1	Escherichia coli
1275	ESCO001.0321.00278.P003	integron_03	CALIN	3	3	GCF_002853655.1	Escherichia coli
1276	ESCO001.0321.00279.P002	integron_01	complete	1	2	GCF_002853715.1	Escherichia coli
1277	ESCO001.0321.00280.P002	integron_01	complete	6	7	GCF_002853805.1	Escherichia coli
1278	ESCO001.0321.00280.P004	integron_01	CALIN	6	6	GCF_002853805.1	Escherichia coli
1279	ESCO001.0321.00281.P003	integron_01	In0		1	GCF_002854065.1	Escherichia coli
1280	ESCO001.0321.00281.P003	integron_02	CALIN	4	5	GCF_002854065.1	Escherichia coli
1281	ESCO001.0321.00281.P003	integron_03	CALIN	3	3	GCF_002854065.1	Escherichia coli
1282	ESCO001.0321.00283.P002	integron_01	In0		1	GCF_002855415.1	Escherichia coli
1283	ESCO001.0321.00283.P002	integron_02	CALIN	3	3	GCF_002855415.1	Escherichia coli
1284	ESCO001.0321.00284.P002	integron_01	complete	1	3	GCF_002859105.1	Escherichia coli
1285	ESCO001.0321.00284.P003	integron_01	complete	1	3	GCF_002859105.1	Escherichia coli
1286	ESCO001.0321.00285.C001	integron_01	complete	2	4	GCF_002860085.1	Escherichia coli
1287	ESCO001.0321.00285.P003	integron_01	CALIN	2	2	GCF_002860085.1	Escherichia coli
1288	ESCO001.0321.00285.P003	integron_02	complete	3	6	GCF_002860085.1	Escherichia coli
1289	ESCO001.0321.00285.P004	integron_01	complete	3	5	GCF_002860085.1	Escherichia coli
1290	ESCO001.0321.00286.P002	integron_01	complete	2	4	GCF_002860105.1	Escherichia coli
1291	ESCO001.0321.00286.P002	integron_02	CALIN	2	2	GCF_002860105.1	Escherichia coli
1292	ESCO001.0321.00286.P004	integron_01	complete	3	4	GCF_002860105.1	Escherichia coli
1293	ESCO001.0321.00291.P002	integron_01	CALIN	2	3	GCF_002870165.1	Escherichia coli
1294	ESCO001.0321.00291.P002	integron_02	complete	3	5	GCF_002870165.1	Escherichia coli
1295	ESCO001.0321.00291.P002	integron_03	CALIN	2	3	GCF_002870165.1	Escherichia coli
1296	ESCO001.0321.00293.C001	integron_01	complete	1	3	GCF_002887715.1	Escherichia coli
1297	ESCO001.0321.00293.C001	integron_02	complete	1	3	GCF_002887715.1	Escherichia coli
1298	ESCO001.0321.00300.P003	integron_01	complete	1	3	GCF_002903105.1	Escherichia coli
1299	ESCO001.0321.00300.P003	integron_02	complete	2	4	GCF_002903105.1	Escherichia coli
1300	ESCO001.0321.00301.P002	integron_01	CALIN	3	4	GCF_002903125.1	Escherichia coli
1301	ESCO001.0321.00302.P002	integron_01	CALIN	2	2	GCF_002925525.1	Escherichia coli
1302	ESCO001.0321.00302.P002	integron_02	In0		1	GCF_002925525.1	Escherichia coli
1303	ESCO001.0321.00302.P004	integron_01	complete	1	3	GCF_002925525.1	Escherichia coli
1304	ESCO001.0321.00302.P004	integron_02	CALIN	2	3	GCF_002925525.1	Escherichia coli
1305	ESCO001.0321.00304.P002	integron_01	complete	1	3	GCF_002934895.1	Escherichia coli
1306	ESCO001.0321.00306.P003	integron_01	complete	3	6	GCF_002945135.3	Escherichia coli
1307	ESCO001.0321.00307.C001	integron_01	CALIN	2	2	GCF_002946715.1	Escherichia coli
1308	ESCO001.0321.00307.C001	integron_02	CALIN	3	4	GCF_002946715.1	Escherichia coli
1309	ESCO001.0321.00311.P002	integron_01	complete	1	4	GCF_002951695.1	Escherichia coli
1310	ESCO001.0321.00312.P002	integron_01	In0		1	GCF_002951715.1	Escherichia coli
1311	ESCO001.0321.00313.P002	integron_01	complete	3	5	GCF_002951735.1	Escherichia coli
1312	ESCO001.0321.00314.C001	integron_01	CALIN	2	3	GCF_002951755.1	Escherichia coli
1313	ESCO001.0321.00315.P002	integron_01	complete	6	7	GCF_002951775.1	Escherichia coli
1314	ESCO001.0321.00315.P002	integron_02	CALIN	2	2	GCF_002951775.1	Escherichia coli
1315	ESCO001.0321.00315.P003	integron_01	complete	2	4	GCF_002951775.1	Escherichia coli
1316	ESCO001.0321.00315.P004	integron_01	CALIN	2	3	GCF_002951775.1	Escherichia coli
1317	ESCO001.0321.00315.P004	integron_02	complete	6	7	GCF_002951775.1	Escherichia coli
1318	ESCO001.0321.00318.P002	integron_01	CALIN	4	5	GCF_002952095.1	Escherichia coli
1319	ESCO001.0321.00318.P002	integron_02	complete	5	6	GCF_002952095.1	Escherichia coli
1320	ESCO001.0321.00318.P003	integron_01	complete	1	3	GCF_002952095.1	Escherichia coli
1321	ESCO001.0321.00332.P002	integron_01	complete	6	7	GCF_002953435.1	Escherichia coli
1322	ESCO001.0321.00332.P002	integron_02	CALIN	4	5	GCF_002953435.1	Escherichia coli
1323	ESCO001.0321.00333.P002	integron_01	CALIN	2	2	GCF_002953455.1	Escherichia coli
1324	ESCO001.0321.00333.P002	integron_02	complete	2	4	GCF_002953455.1	Escherichia coli
1325	ESCO001.0321.00333.P002	integron_03	CALIN	3	4	GCF_002953455.1	Escherichia coli
1326	ESCO001.0321.00343.P002	integron_01	CALIN	2	2	GCF_002968715.1	Escherichia coli
1327	ESCO001.0321.00343.P003	integron_01	CALIN	4	4	GCF_002968715.1	Escherichia coli
1328	ESCO001.0321.00344.P002	integron_01	complete	2	4	GCF_002968735.1	Escherichia coli
1329	ESCO001.0321.00344.P002	integron_02	CALIN	2	2	GCF_002968735.1	Escherichia coli
1330	ESCO001.0321.00345.P002	integron_01	complete	2	4	GCF_002968935.1	Escherichia coli
1331	ESCO001.0321.00349.C001	integron_01	complete	3	4	GCF_002999075.1	Escherichia coli
1332	ESCO001.0321.00349.C001	integron_02	complete	3	5	GCF_002999075.1	Escherichia coli
1333	ESCO001.0321.00392.C001	integron_01	complete	1	3	GCF_003018815.1	Escherichia coli
1334	ESCO001.0321.00394.P002	integron_01	complete	3	5	GCF_003018875.1	Escherichia coli
1335	ESCO001.0321.00409.P002	integron_01	complete	2	4	GCF_003030025.1	Escherichia coli
1336	ESCO001.0321.00411.P002	integron_01	CALIN	2	1	GCF_003030365.1	Escherichia coli
1337	ESCO001.0321.00411.P002	integron_02	complete	2	4	GCF_003030365.1	Escherichia coli
1338	ESCO001.0321.00411.P002	integron_03	CALIN	3	4	GCF_003030365.1	Escherichia coli
1339	ESCO001.0321.00413.C001	integron_01	In0		1	GCF_003031735.1	Escherichia coli
1340	ESCO001.0321.00413.P002	integron_01	In0		1	GCF_003031735.1	Escherichia coli
1341	ESCO001.0321.00413.P002	integron_02	complete	3	6	GCF_003031735.1	Escherichia coli
1342	ESCO001.0321.00414.P002	integron_01	complete	3	5	GCF_003031775.1	Escherichia coli
1343	ESCO001.0321.00414.P002	integron_02	CALIN	2	2	GCF_003031775.1	Escherichia coli
1344	ESCO001.0321.00415.P002	integron_01	CALIN	2	3	GCF_003031795.1	Escherichia coli
1345	ESCO001.0321.00415.P002	integron_02	CALIN	2	2	GCF_003031795.1	Escherichia coli
1346	ESCO001.0321.00415.P003	integron_01	CALIN	3	4	GCF_003031795.1	Escherichia coli
1347	ESCO001.0321.00416.P002	integron_01	complete	2	4	GCF_003031815.1	Escherichia coli
1348	ESCO001.0321.00416.P003	integron_01	CALIN	2	2	GCF_003031815.1	Escherichia coli
1349	ESCO001.0321.00416.P003	integron_02	complete	1	3	GCF_003031815.1	Escherichia coli
1350	ESCO001.0321.00419.P002	integron_01	CALIN	2	2	GCF_003051985.2	Escherichia coli
1351	ESCO001.0321.00419.P002	integron_02	CALIN	2	3	GCF_003051985.2	Escherichia coli
1352	ESCO001.0321.00422.P002	integron_01	CALIN	2	2	GCF_003073815.1	Escherichia coli
1353	ESCO001.0321.00423.P002	integron_01	CALIN	2	3	GCF_003073835.1	Escherichia coli
1354	ESCO001.0321.00423.P002	integron_02	complete	3	5	GCF_003073835.1	Escherichia coli
1355	ESCO001.0321.00423.P004	integron_01	CALIN	2	3	GCF_003073835.1	Escherichia coli
1356	ESCO001.0321.00424.C001	integron_01	complete	3	4	GCF_003073875.1	Escherichia coli
1357	ESCO001.0321.00424.C001	integron_02	complete	3	5	GCF_003073875.1	Escherichia coli
1358	ESCO001.0321.00425.P002	integron_01	complete	1	3	GCF_003073955.1	Escherichia coli
1359	ESCO001.0321.00426.C001	integron_01	complete	1	3	GCF_003076395.1	Escherichia coli
1360	ESCO001.0321.00426.C001	integron_02	complete	3	5	GCF_003076395.1	Escherichia coli
1361	ESCO001.0321.00426.P003	integron_01	complete	1	2	GCF_003076395.1	Escherichia coli
1362	ESCO001.0321.00428.P002	integron_01	complete	2	4	GCF_003111785.1	Escherichia coli
1363	ESCO001.0321.00429.C001	integron_01	CALIN	2	2	GCF_003122105.1	Escherichia coli
1364	ESCO001.0321.00429.P002	integron_01	complete	3	5	GCF_003122105.1	Escherichia coli
1365	ESCO001.0321.00429.P003	integron_01	complete	3	5	GCF_003122105.1	Escherichia coli
1366	ESCO001.0321.00432.P002	integron_01	CALIN	2	3	GCF_003180975.1	Escherichia coli
1367	ESCO001.0321.00432.P002	integron_02	CALIN	4	6	GCF_003180975.1	Escherichia coli
1368	ESCO001.0321.00433.P002	integron_01	complete	2	3	GCF_003180995.1	Escherichia coli
1369	ESCO001.0321.00433.P002	integron_02	CALIN	2	3	GCF_003180995.1	Escherichia coli
1370	ESCO001.0321.00434.P002	integron_01	CALIN	2	3	GCF_003181035.1	Escherichia coli
1371	ESCO001.0321.00435.P002	integron_01	CALIN	2	3	GCF_003194345.1	Escherichia coli
1372	ESCO001.0321.00437.C001	integron_01	CALIN	3	4	GCF_003204155.1	Escherichia coli
1373	ESCO001.0321.00438.P002	integron_01	In0		1	GCF_003204955.1	Escherichia coli
1374	ESCO001.0321.00439.P002	integron_01	CALIN	3	4	GCF_003231115.1	Escherichia coli
1375	ESCO001.0321.00439.P002	integron_02	complete	6	7	GCF_003231115.1	Escherichia coli
1376	ESCO001.0321.00440.P002	integron_01	complete	2	4	GCF_003254065.1	Escherichia coli
1377	ESCO001.0321.00440.P003	integron_01	CALIN	3	4	GCF_003254065.1	Escherichia coli
1378	ESCO001.0321.00445.P002	integron_01	CALIN	3	4	GCF_003288415.1	Escherichia coli
1379	ESCO001.0321.00446.P002	integron_01	complete	1	3	GCF_003288455.1	Escherichia coli
1380	ESCO001.0321.00446.P002	integron_02	CALIN	2	3	GCF_003288455.1	Escherichia coli
1381	ESCO001.0321.00449.P002	integron_01	complete	2	4	GCF_003308975.1	Escherichia coli
1382	ESCO001.0321.00450.P002	integron_01	complete	2	4	GCF_003325975.1	Escherichia coli
1383	ESCO001.0321.00450.P002	integron_02	complete	2	4	GCF_003325975.1	Escherichia coli
1384	ESCO001.0321.00451.P005	integron_01	complete	2	2	GCF_003336405.1	Escherichia coli
1385	ESCO001.0321.00452.P004	integron_01	CALIN	2	3	GCF_003342715.1	Escherichia coli
1386	ESCO001.0321.00452.P004	integron_02	CALIN	3	3	GCF_003342715.1	Escherichia coli
1387	ESCO001.0321.00454.P002	integron_01	complete	3	5	GCF_003346835.1	Escherichia coli
1388	ESCO001.0321.00455.P002	integron_01	CALIN	2	3	GCF_003351385.1	Escherichia coli
1389	ESCO001.0321.00460.P004	integron_01	CALIN	6	5	GCF_003402955.1	Escherichia coli
1390	ESCO001.0321.00461.P002	integron_01	complete	3	5	GCF_003410275.1	Escherichia coli
1391	ESCO001.0321.00461.P002	integron_02	complete	4	5	GCF_003410275.1	Escherichia coli
1392	ESCO001.0321.00462.C001	integron_01	CALIN	3	4	GCF_003413625.1	Escherichia coli
1393	ESCO001.0321.00464.C001	integron_01	complete	2	4	GCF_003443795.1	Escherichia coli
1394	ESCO001.0321.00464.P002	integron_01	complete	4	7	GCF_003443795.1	Escherichia coli
1395	ESCO001.0321.00465.P004	integron_01	CALIN	3	4	GCF_003443815.1	Escherichia coli
1396	ESCO001.0321.00468.P002	integron_01	CALIN	2	3	GCF_003571665.1	Escherichia coli
1397	ESCO001.0321.00469.C001	integron_01	complete	3	5	GCF_003571685.1	Escherichia coli
1398	ESCO001.0321.00470.P002	integron_01	complete	2	4	GCF_003571765.1	Escherichia coli
1399	ESCO001.0321.00470.P003	integron_01	complete	3	5	GCF_003571765.1	Escherichia coli
1400	ESCO001.0321.00473.P002	integron_01	CALIN	2	3	GCF_003627855.1	Escherichia coli
1401	ESCO001.0321.00474.P002	integron_01	complete	6	7	GCF_003667385.1	Escherichia coli
1402	ESCO001.0321.00476.P002	integron_01	complete	6	7	GCF_003667425.1	Escherichia coli
1403	ESCO001.0321.00477.P002	integron_01	complete	6	7	GCF_003691425.1	Escherichia coli
1404	ESCO001.0321.00477.P004	integron_01	complete	6	7	GCF_003691425.1	Escherichia coli
1405	ESCO001.0321.00478.P002	integron_01	complete	2	4	GCF_003703795.1	Escherichia coli
1406	ESCO001.0321.00480.P002	integron_01	complete	2	4	GCF_003711045.1	Escherichia coli
1407	ESCO001.0321.00480.P002	integron_02	CALIN	2	2	GCF_003711045.1	Escherichia coli
1408	ESCO001.0321.00482.P002	integron_01	complete	6	7	GCF_003790525.1	Escherichia coli
1409	ESCO001.0321.00482.P002	integron_02	CALIN	2	3	GCF_003790525.1	Escherichia coli
1410	ESCO001.0321.00482.P002	integron_03	CALIN	4	6	GCF_003790525.1	Escherichia coli
1411	ESCO001.0321.00482.P003	integron_01	complete	2	4	GCF_003790525.1	Escherichia coli
1412	ESCO001.0321.00483.C001	integron_01	CALIN	3	4	GCF_003812625.1	Escherichia coli
1413	ESCO001.0321.00484.C001	integron_01	CALIN	2	2	GCF_003812945.1	Escherichia coli
1414	ESCO001.0321.00486.P002	integron_01	CALIN	2	3	GCF_003856575.1	Escherichia coli
1415	ESCO001.0321.00486.P002	integron_02	CALIN	2	2	GCF_003856575.1	Escherichia coli
1416	ESCO001.0321.00487.P002	integron_01	complete	2	4	GCF_003856615.1	Escherichia coli
1417	ESCO001.0321.00487.P002	integron_02	CALIN	2	2	GCF_003856615.1	Escherichia coli
1418	ESCO001.0321.00488.P002	integron_01	CALIN	2	3	GCF_003856635.1	Escherichia coli
1419	ESCO001.0321.00489.P002	integron_01	CALIN	2	3	GCF_003856655.1	Escherichia coli
1420	ESCO001.0321.00490.P002	integron_01	CALIN	2	3	GCF_003856675.1	Escherichia coli
1421	ESCO001.0321.00491.P002	integron_01	CALIN	2	2	GCF_003856695.1	Escherichia coli
1422	ESCO001.0321.00491.P002	integron_02	complete	3	5	GCF_003856695.1	Escherichia coli
1423	ESCO001.0321.00492.P002	integron_01	complete	1	3	GCF_003856995.1	Escherichia coli
1424	ESCO001.0321.00492.P002	integron_02	CALIN	3	3	GCF_003856995.1	Escherichia coli
1425	ESCO001.0321.00492.P002	integron_03	CALIN	3	2	GCF_003856995.1	Escherichia coli
1426	ESCO001.0321.00493.P002	integron_01	CALIN	3	4	GCF_003925895.1	Escherichia coli
1427	ESCO001.0321.00499.P004	integron_01	CALIN	2	2	GCF_003956265.1	Escherichia coli
1428	ESCO001.0321.00515.P002	integron_01	In0		1	GCF_003971215.1	Escherichia coli
1429	ESCO001.0321.00516.P002	integron_01	In0		1	GCF_003991155.1	Escherichia coli
1430	ESCO001.0321.00516.P002	integron_02	complete	6	7	GCF_003991155.1	Escherichia coli
1431	ESCO001.0321.00516.P003	integron_01	complete	1	3	GCF_003991155.1	Escherichia coli
1432	ESCO001.0321.00516.P003	integron_02	complete	1	3	GCF_003991155.1	Escherichia coli
1433	ESCO001.0321.00518.P002	integron_01	complete	6	7	GCF_004006575.1	Escherichia coli
1434	ESCO001.0321.00518.P003	integron_01	complete	2	4	GCF_004006575.1	Escherichia coli
1435	ESCO001.0321.00527.C001	integron_01	CALIN	3	4	GCF_004011015.1	Escherichia coli
1436	ESCO001.0321.00529.P002	integron_01	complete	3	6	GCF_004088295.1	Escherichia coli
1437	ESCO001.0321.00529.P002	integron_02	complete	2	4	GCF_004088295.1	Escherichia coli
1438	ESCO001.0321.00529.P002	integron_03	CALIN	2	2	GCF_004088295.1	Escherichia coli
1439	ESCO001.0321.00530.C001	integron_01	CALIN	2	2	GCF_004114395.1	Escherichia coli
1440	ESCO001.0321.00530.P002	integron_01	CALIN	3	2	GCF_004114395.1	Escherichia coli
1441	ESCO001.0321.00530.P002	integron_02	CALIN	3	3	GCF_004114395.1	Escherichia coli
1442	ESCO001.0321.00530.P002	integron_03	complete	1	3	GCF_004114395.1	Escherichia coli
1443	ESCO001.0321.00532.P002	integron_01	CALIN	2	3	GCF_004135165.1	Escherichia coli
1444	ESCO001.0321.00533.P002	integron_01	CALIN	3	3	GCF_004135775.1	Escherichia coli
1445	ESCO001.0321.00533.P002	integron_02	CALIN	2	2	GCF_004135775.1	Escherichia coli
1446	ESCO001.0321.00534.P002	integron_01	CALIN	3	3	GCF_004135815.1	Escherichia coli
1447	ESCO001.0321.00534.P002	integron_02	CALIN	2	3	GCF_004135815.1	Escherichia coli
1448	ESCO001.0321.00535.P002	integron_01	CALIN	2	3	GCF_004135915.1	Escherichia coli
1449	ESCO001.0321.00536.P002	integron_01	CALIN	2	3	GCF_004141955.1	Escherichia coli
1450	ESCO001.0321.00537.P002	integron_01	CALIN	2	3	GCF_004193755.1	Escherichia coli
1451	ESCO001.0321.00538.P002	integron_01	complete	2	5	GCF_004295365.1	Escherichia coli
1452	ESCO001.0321.00538.P004	integron_01	complete	1	2	GCF_004295365.1	Escherichia coli
1453	ESCO001.0321.00540.P005	integron_01	complete	2	4	GCF_004301465.1	Escherichia coli
1454	ESCO001.0321.00547.P002	integron_01	CALIN	6	2	GCF_004368015.1	Escherichia coli
1455	ESCO001.0321.00547.P002	integron_02	CALIN	6	6	GCF_004368015.1	Escherichia coli
1456	ESCO001.0321.00549.P002	integron_01	CALIN	2	2	GCF_004405205.2	Escherichia coli
1457	ESCO001.0321.00550.P002	integron_01	complete	2	4	GCF_004526255.1	Escherichia coli
1458	ESCO001.0321.00552.P002	integron_01	CALIN	2	3	GCF_004564175.1	Escherichia coli
1459	ESCO001.0321.00552.P002	integron_02	CALIN	2	2	GCF_004564175.1	Escherichia coli
1460	ESCO001.0321.00553.C001	integron_01	CALIN	3	4	GCF_004759025.1	Escherichia coli
1461	ESCO001.0321.00554.C001	integron_01	complete	1	3	GCF_004771235.1	Escherichia coli
1462	ESCO001.0321.00555.C001	integron_01	CALIN	5	5	GCF_004792495.1	Escherichia coli
1463	ESCO001.0321.00556.C001	integron_01	CALIN	3	4	GCF_004801575.1	Escherichia coli
1464	ESCO001.0321.00559.C001	integron_01	CALIN	4	5	GCF_004924255.1	Escherichia coli
1465	ESCO001.0321.00559.C001	integron_02	CALIN	5	6	GCF_004924255.1	Escherichia coli
1466	ESCO001.0321.00559.C001	integron_03	CALIN	2	2	GCF_004924255.1	Escherichia coli
1467	ESCO001.0321.00559.C001	integron_04	In0		1	GCF_004924255.1	Escherichia coli
1468	ESCO001.0321.00559.P002	integron_01	complete	1	2	GCF_004924255.1	Escherichia coli
1469	ESCO001.0321.00559.P003	integron_01	complete	1	2	GCF_004924255.1	Escherichia coli
1470	ESCO001.0321.00559.P003	integron_02	CALIN	2	3	GCF_004924255.1	Escherichia coli
1471	ESCO001.0321.00560.C001	integron_01	complete	6	8	GCF_004924275.1	Escherichia coli
1472	ESCO001.0321.00561.P002	integron_01	CALIN	2	3	GCF_004924355.1	Escherichia coli
1473	ESCO001.0321.00561.P003	integron_01	In0		1	GCF_004924355.1	Escherichia coli
1474	ESCO001.0321.00561.P003	integron_02	complete	6	7	GCF_004924355.1	Escherichia coli
1475	ESCO001.0321.00562.P002	integron_01	complete	2	5	GCF_005156265.1	Escherichia coli
1476	ESCO001.0321.00562.P003	integron_01	complete	2	5	GCF_005156265.1	Escherichia coli
1477	ESCO001.0321.00562.P003	integron_02	In0		1	GCF_005156265.1	Escherichia coli
1478	ESCO001.0321.00562.P004	integron_01	CALIN	4	6	GCF_005156265.1	Escherichia coli
1479	ESCO001.0321.00603.P002	integron_01	CALIN	2	2	GCF_005671355.1	Escherichia coli
1480	ESCO001.0321.00603.P002	integron_02	complete	2	4	GCF_005671355.1	Escherichia coli
1481	ESCO001.0321.00604.C001	integron_01	complete	2	4	GCF_005886035.1	Escherichia coli
1482	ESCO001.0321.00608.C001	integron_01	CALIN	3	4	GCF_005954725.1	Escherichia coli
1483	ESCO001.0321.00608.C001	integron_02	CALIN	3	4	GCF_005954725.1	Escherichia coli
1484	ESCO001.0321.00610.P002	integron_01	complete	1	3	GCF_006337025.1	Escherichia coli
1485	ESCO001.0321.00610.P003	integron_01	CALIN	2	2	GCF_006337025.1	Escherichia coli
1486	ESCO001.0321.00612.P004	integron_01	CALIN	2	3	GCF_006352265.1	Escherichia coli
1487	ESCO001.0321.00613.C001	integron_01	complete	1	3	GCF_006364695.1	Escherichia coli
1488	ESCO001.0321.00614.P002	integron_01	complete	3	5	GCF_006777065.1	Escherichia coli
1489	ESCO001.0321.00617.C001	integron_01	complete	1	3	GCF_006965465.1	Escherichia coli
1490	ESCO001.0321.00618.P002	integron_01	CALIN	2	2	GCF_007012305.1	Escherichia coli
1491	ESCO001.0321.00618.P002	integron_02	complete	2	4	GCF_007012305.1	Escherichia coli
1492	ESCO001.0321.00618.P002	integron_03	CALIN	3	4	GCF_007012305.1	Escherichia coli
1493	ESCO001.0321.00618.P003	integron_01	complete	1	2	GCF_007012305.1	Escherichia coli
1494	ESCO001.0321.00619.P002	integron_01	complete	2	4	GCF_007632435.1	Escherichia coli
1495	ESCO001.0321.00623.P002	integron_01	complete	6	7	GCF_007995175.1	Escherichia coli
1496	ESCO001.0321.00624.P002	integron_01	complete	1	3	GCF_008033295.1	Escherichia coli
1497	ESCO001.0321.00624.P002	integron_02	CALIN	2	3	GCF_008033295.1	Escherichia coli
1498	ESCO001.0321.00624.P004	integron_01	complete	1	3	GCF_008033295.1	Escherichia coli
1499	ESCO001.0321.00625.P002	integron_01	complete	1	3	GCF_008033315.1	Escherichia coli
1500	ESCO001.0321.00625.P002	integron_02	CALIN	2	3	GCF_008033315.1	Escherichia coli
1501	ESCO001.0321.00628.P002	integron_01	complete	3	5	GCF_008080655.1	Escherichia coli
1502	ESCO001.0321.00629.P002	integron_01	complete	2	4	GCF_008124425.1	Escherichia coli
1503	ESCO001.0321.00629.P003	integron_01	CALIN	3	4	GCF_008124425.1	Escherichia coli
1504	ESCO001.0321.00630.P002	integron_01	In0		1	GCF_008152105.1	Escherichia coli
1505	ESCO001.0321.00634.P002	integron_01	complete	2	4	GCF_008632555.1	Escherichia coli
1506	ESCO001.0321.00634.P003	integron_01	CALIN	3	4	GCF_008632555.1	Escherichia coli
1507	ESCO001.0321.00635.P002	integron_01	complete	2	4	GCF_008632575.1	Escherichia coli
1508	ESCO001.0321.00635.P003	integron_01	CALIN	3	4	GCF_008632575.1	Escherichia coli
1509	ESCO001.0321.00636.P002	integron_01	CALIN	4	5	GCF_008632595.1	Escherichia coli
1510	ESCO001.0321.00637.C001	integron_01	complete	2	4	GCF_008642395.1	Escherichia coli
1511	ESCO001.0321.00644.P002	integron_01	complete	1	2	GCF_008807135.1	Escherichia coli
1512	ESCO001.0321.00644.P003	integron_01	complete	3	4	GCF_008807135.1	Escherichia coli
1513	ESCO001.0321.00645.P002	integron_01	complete	1	2	GCF_008807155.1	Escherichia coli
1514	ESCO001.0321.00645.P003	integron_01	CALIN	4	5	GCF_008807155.1	Escherichia coli
1515	ESCO001.0321.00646.P003	integron_01	complete	1	2	GCF_008807295.1	Escherichia coli
1516	ESCO001.0321.00647.C001	integron_01	complete	2	4	GCF_008807655.1	Escherichia coli
1517	ESCO001.0321.00648.P002	integron_01	complete	6	7	GCF_008823185.1	Escherichia coli
1518	ESCO001.0321.00664.P002	integron_01	CALIN	2	2	GCF_008949495.1	Escherichia coli
1519	ESCO001.0321.00664.P003	integron_01	complete	1	3	GCF_008949495.1	Escherichia coli
1520	ESCO001.0321.00665.C001	integron_01	complete	2	4	GCF_009176965.1	Escherichia coli
1521	ESCO001.0321.00675.P002	integron_01	complete	2	4	GCF_009577985.1	Escherichia coli
1522	ESCO001.0321.00675.P003	integron_01	CALIN	2	2	GCF_009577985.1	Escherichia coli
1523	ESCO001.0321.00676.P002	integron_01	complete	2	4	GCF_009648495.1	Escherichia coli
1524	ESCO001.0321.00684.P002	integron_01	complete	1	2	GCF_009671085.1	Escherichia coli
1525	ESCO001.0321.00685.P002	integron_01	complete	6	7	GCF_009671105.1	Escherichia coli
1526	ESCO001.0321.00685.P002	integron_02	complete	1	2	GCF_009671105.1	Escherichia coli
1527	ESCO001.0321.00686.P002	integron_01	complete	1	2	GCF_009671125.1	Escherichia coli
1528	ESCO001.0321.00687.C001	integron_01	complete	1	3	GCF_009720465.1	Escherichia coli
1529	ESCO001.0321.00687.P004	integron_01	CALIN	2	4	GCF_009720465.1	Escherichia coli
1530	ESCO001.0321.00687.P005	integron_01	CALIN	2	2	GCF_009720465.1	Escherichia coli
1531	ESCO001.0321.00689.P002	integron_01	complete	1	2	GCF_009738145.1	Escherichia coli
1532	ESCO001.0321.00691.P002	integron_01	complete	2	4	GCF_009761715.1	Escherichia coli
1533	ESCO001.0321.00691.P002	integron_02	CALIN	2	2	GCF_009761715.1	Escherichia coli
1534	ESCO001.0321.00695.C001	integron_01	complete	1	3	GCF_009866945.1	Escherichia coli
1535	ESCO001.0321.00695.P002	integron_01	complete	2	4	GCF_009866945.1	Escherichia coli
1536	ESCO001.0321.00695.P002	integron_02	complete	6	7	GCF_009866945.1	Escherichia coli
1537	ESCO001.0321.00696.P002	integron_01	In0		1	GCF_009867015.2	Escherichia coli
1538	ESCO001.0321.00696.P002	integron_02	complete	2	4	GCF_009867015.2	Escherichia coli
1539	ESCO001.0321.00696.P003	integron_01	complete	2	4	GCF_009867015.2	Escherichia coli
1540	ESCO001.0321.00697.P002	integron_01	complete	1	3	GCF_009867035.1	Escherichia coli
1541	ESCO001.0321.00699.P003	integron_01	CALIN	3	3	GCF_009905115.1	Escherichia coli
1542	ESCO001.0321.00699.P003	integron_02	complete	1	2	GCF_009905115.1	Escherichia coli
1543	ESCO001.0321.00702.P002	integron_01	complete	6	7	GCF_009909465.1	Escherichia coli
1544	ESCO001.0321.00703.P002	integron_01	complete	6	7	GCF_009909485.1	Escherichia coli
1545	ESCO001.0321.00704.C001	integron_01	CALIN	2	2	GCF_009909505.1	Escherichia coli
1546	ESCO001.0321.00704.C001	integron_02	complete	5	8	GCF_009909505.1	Escherichia coli
1547	ESCO001.0321.00704.C001	integron_03	CALIN	4	5	GCF_009909505.1	Escherichia coli
1548	ESCO001.0321.00705.P002	integron_01	complete	6	7	GCF_009913415.1	Escherichia coli
1549	ESCO001.0321.00706.P002	integron_01	complete	6	7	GCF_009914295.1	Escherichia coli
1550	ESCO001.0321.00707.C001	integron_01	complete	1	3	GCF_009931435.1	Escherichia coli
1551	ESCO001.0321.00717.P002	integron_01	complete	3	4	GCF_010092405.1	Escherichia coli
1552	ESCO001.0321.00719.P002	integron_01	complete	4	5	GCF_010365325.1	Escherichia coli
1553	ESCO001.0321.00720.P002	integron_01	complete	2	4	GCF_010365345.1	Escherichia coli
1554	ESCO001.0321.00721.C001	integron_01	CALIN	2	1	GCF_010365365.1	Escherichia coli
1555	ESCO001.0321.00721.C001	integron_02	CALIN	3	4	GCF_010365365.1	Escherichia coli
1556	ESCO001.0321.00722.C001	integron_01	CALIN	2	2	GCF_010365385.1	Escherichia coli
1557	ESCO001.0321.00723.C001	integron_01	CALIN	2	1	GCF_010365405.1	Escherichia coli
1558	ESCO001.0321.00723.C001	integron_02	CALIN	3	4	GCF_010365405.1	Escherichia coli
1559	ESCO001.0321.00724.P002	integron_01	complete	2	4	GCF_010365425.1	Escherichia coli
1560	ESCO001.0321.00725.P002	integron_01	complete	2	4	GCF_010365465.1	Escherichia coli
1561	ESCO001.0321.00725.P002	integron_02	CALIN	2		GCF_010365465.1	Escherichia coli
1562	ESCO001.0321.00726.C001	integron_01	CALIN	3	4	GCF_010365485.1	Escherichia coli
1563	ESCO001.0321.00727.P004	integron_01	CALIN	3	4	GCF_010365505.1	Escherichia coli
1564	ESCO001.0321.00728.P002	integron_01	CALIN	2	2	GCF_010365525.1	Escherichia coli
1565	ESCO001.0321.00728.P002	integron_02	CALIN	3	4	GCF_010365525.1	Escherichia coli
1566	ESCO001.0321.00729.P002	integron_01	complete	2	4	GCF_010365545.1	Escherichia coli
1567	ESCO001.0321.00729.P002	integron_02	CALIN	3		GCF_010365545.1	Escherichia coli
1568	ESCO001.0321.00729.P002	integron_03	CALIN	2	2	GCF_010365545.1	Escherichia coli
1569	ESCO001.0321.00735.C001	integron_01	complete	4	6	GCF_010724935.1	Escherichia coli
1570	ESCO001.0321.00736.C001	integron_01	CALIN	2	3	GCF_010725305.1	Escherichia coli
1571	ESCO001.0321.00736.C001	integron_02	complete	3	5	GCF_010725305.1	Escherichia coli
1572	ESCO001.0321.00737.C001	integron_01	CALIN	3	4	GCF_011022275.1	Escherichia coli
1573	ESCO001.0321.00737.C001	integron_02	CALIN	2	2	GCF_011022275.1	Escherichia coli
1574	ESCO001.0321.00744.C001	integron_01	complete	2	3	GCF_011045475.1	Escherichia coli
1575	ESCO001.0321.00744.P002	integron_01	CALIN	3	4	GCF_011045475.1	Escherichia coli
1576	ESCO001.0321.00745.P002	integron_01	complete	6	7	GCF_011045875.1	Escherichia coli
1577	ESCO001.0321.00746.P002	integron_01	complete	6	7	GCF_011045895.1	Escherichia coli
1578	ESCO001.0321.00749.C001	integron_01	CALIN	2	2	GCF_011330935.2	Escherichia coli
1579	ESCO001.0321.00749.P002	integron_01	complete	2	4	GCF_011330935.2	Escherichia coli
1580	ESCO001.0321.00749.P002	integron_02	CALIN	2	2	GCF_011330935.2	Escherichia coli
1581	ESCO001.0321.00750.P002	integron_01	CALIN	3	3	GCF_011331065.1	Escherichia coli
1582	ESCO001.0321.00751.C001	integron_01	CALIN	2	2	GCF_011331215.2	Escherichia coli
1583	ESCO001.0321.00752.P002	integron_01	complete	1	2	GCF_011383085.1	Escherichia coli
1584	ESCO001.0321.00760.P002	integron_01	complete	1	2	GCF_011492885.1	Escherichia coli
1585	ESCO001.0321.00760.P003	integron_01	complete	3	5	GCF_011492885.1	Escherichia coli
1586	ESCO001.0321.00762.P002	integron_01	complete	1	2	GCF_011492985.1	Escherichia coli
1587	ESCO001.0321.00762.P003	integron_01	complete	2	4	GCF_011492985.1	Escherichia coli
1588	ESCO001.0321.00763.P002	integron_01	complete	1	2	GCF_011691525.1	Escherichia coli
1589	ESCO001.0321.00764.P002	integron_01	CALIN	3	4	GCF_011769865.1	Escherichia coli
1590	ESCO001.0321.00765.P002	integron_01	CALIN	4	5	GCF_011996085.1	Escherichia coli
1591	ESCO001.0321.00765.P002	integron_02	CALIN	2	2	GCF_011996085.1	Escherichia coli
1592	ESCO001.0321.00765.P002	integron_03	CALIN	6	6	GCF_011996085.1	Escherichia coli
1593	ESCO001.0321.00767.P002	integron_01	CALIN	2	3	GCF_012149945.1	Escherichia coli
1594	ESCO001.0321.00770.P002	integron_01	complete	1	2	GCF_012278675.1	Escherichia coli
1595	ESCO001.0321.00771.C001	integron_01	complete	2	4	GCF_012516455.1	Escherichia coli
1596	ESCO001.0321.00772.C001	integron_01	CALIN	2	3	GCF_012537835.1	Escherichia coli
1597	ESCO001.0321.00772.P002	integron_01	complete	3	5	GCF_012537835.1	Escherichia coli
1598	ESCO001.0321.00774.C001	integron_01	CALIN	3	4	GCF_012934455.1	Escherichia coli
1599	ESCO001.0321.00778.P002	integron_01	In0		1	GCF_012934535.1	Escherichia coli
1600	ESCO001.0321.00780.P002	integron_01	complete	2	4	GCF_012934575.1	Escherichia coli
1601	ESCO001.0321.00787.P002	integron_01	CALIN	2	3	GCF_012934715.1	Escherichia coli
1602	ESCO001.0321.00790.P002	integron_01	complete	1	2	GCF_012935215.1	Escherichia coli
1603	ESCO001.0321.00791.P005	integron_01	complete	3	5	GCF_012974525.1	Escherichia coli
1604	ESCO001.0321.00794.C001	integron_01	complete	2	4	GCF_013004045.1	Escherichia coli
1605	ESCO001.0321.00795.P002	integron_01	complete	3	5	GCF_013084945.1	Escherichia coli
1606	ESCO001.0321.00796.P002	integron_01	complete	2	4	GCF_013085025.1	Escherichia coli
1607	ESCO001.0321.00799.P002	integron_01	complete	1	3	GCF_013085865.1	Escherichia coli
1608	ESCO001.0321.00812.P002	integron_01	CALIN	2	2	GCF_013201175.1	Escherichia coli
1609	ESCO001.0321.00812.P003	integron_01	In0		1	GCF_013201175.1	Escherichia coli
1610	ESCO001.0321.00812.P003	integron_02	complete	4	5	GCF_013201175.1	Escherichia coli
1611	ESCO001.0321.00813.P002	integron_01	complete	6	7	GCF_013201195.1	Escherichia coli
1612	ESCO001.0321.00813.P002	integron_02	CALIN	2	3	GCF_013201195.1	Escherichia coli
1613	ESCO001.0321.00813.P003	integron_01	complete	1	3	GCF_013201195.1	Escherichia coli
1614	ESCO001.0321.00814.P002	integron_01	complete	6	7	GCF_013201215.1	Escherichia coli
1615	ESCO001.0321.00815.P003	integron_01	complete	6	7	GCF_013201235.1	Escherichia coli
1616	ESCO001.0321.00817.P002	integron_01	complete	2	4	GCF_013201505.1	Escherichia coli
1617	ESCO001.0321.00818.P002	integron_01	complete	2	4	GCF_013201525.1	Escherichia coli
1618	ESCO001.0321.00820.C001	integron_01	complete	1	3	GCF_013282275.1	Escherichia coli
1619	ESCO001.0321.00831.P002	integron_01	CALIN	2	2	GCF_013317085.1	Escherichia coli
1620	ESCO001.0321.00831.P002	integron_02	complete	3	5	GCF_013317085.1	Escherichia coli
1621	ESCO001.0321.00832.C001	integron_01	complete	3	5	GCF_013340785.1	Escherichia coli
1622	ESCO001.0321.00832.P002	integron_01	CALIN	2	3	GCF_013340785.1	Escherichia coli
1623	ESCO001.0321.00832.P002	integron_02	CALIN	2	2	GCF_013340785.1	Escherichia coli
1624	ESCO001.0321.00833.C001	integron_01	complete	3	5	GCF_013340805.1	Escherichia coli
1625	ESCO001.0321.00833.P002	integron_01	CALIN	2	3	GCF_013340805.1	Escherichia coli
1626	ESCO001.0321.00833.P002	integron_02	CALIN	2	2	GCF_013340805.1	Escherichia coli
1627	ESCO001.0321.00836.P002	integron_01	CALIN	2	2	GCF_013357345.1	Escherichia coli
1628	ESCO001.0321.00836.P002	integron_02	complete	3	5	GCF_013357345.1	Escherichia coli
1629	ESCO001.0321.00838.C001	integron_01	In0		1	GCF_013371685.1	Escherichia coli
1630	ESCO001.0321.00838.C001	integron_02	CALIN	3	4	GCF_013371685.1	Escherichia coli
1631	ESCO001.0321.00838.P002	integron_01	CALIN	4	5	GCF_013371685.1	Escherichia coli
1632	ESCO001.0321.00839.C001	integron_01	complete	2	4	GCF_013371725.1	Escherichia coli
1633	ESCO001.0321.00839.P002	integron_01	complete	3	5	GCF_013371725.1	Escherichia coli
1634	ESCO001.0321.00840.P002	integron_01	complete	2	4	GCF_013371745.1	Escherichia coli
1635	ESCO001.0321.00841.P002	integron_01	In0		1	GCF_013372305.1	Escherichia coli
1636	ESCO001.0321.00846.C001	integron_01	complete	3	5	GCF_013372405.1	Escherichia coli
1637	ESCO001.0321.00847.P002	integron_01	CALIN	2	3	GCF_013372425.1	Escherichia coli
1638	ESCO001.0321.00848.C001	integron_01	In0		1	GCF_013374235.1	Escherichia coli
1639	ESCO001.0321.00848.C001	integron_02	CALIN	2	2	GCF_013374235.1	Escherichia coli
1640	ESCO001.0321.00848.P004	integron_01	CALIN	3	4	GCF_013374235.1	Escherichia coli
1641	ESCO001.0321.00849.P002	integron_01	CALIN	2	2	GCF_013374255.1	Escherichia coli
1642	ESCO001.0321.00849.P002	integron_02	CALIN	3	4	GCF_013374255.1	Escherichia coli
1643	ESCO001.0321.00849.P002	integron_03	complete	2	4	GCF_013374255.1	Escherichia coli
1644	ESCO001.0321.00850.P002	integron_01	CALIN	2	3	GCF_013374275.1	Escherichia coli
1645	ESCO001.0321.00850.P002	integron_02	CALIN	2	2	GCF_013374275.1	Escherichia coli
1646	ESCO001.0321.00851.P004	integron_01	CALIN	3	4	GCF_013374295.1	Escherichia coli
1647	ESCO001.0321.00852.P002	integron_01	CALIN	3	4	GCF_013374315.1	Escherichia coli
1648	ESCO001.0321.00853.P002	integron_01	CALIN	3	4	GCF_013374335.1	Escherichia coli
1649	ESCO001.0321.00853.P002	integron_02	complete	2	4	GCF_013374335.1	Escherichia coli
1650	ESCO001.0321.00855.P003	integron_01	complete	1	3	GCF_013376575.1	Escherichia coli
1651	ESCO001.0321.00857.P002	integron_01	complete	4	7	GCF_013388275.1	Escherichia coli
1652	ESCO001.0321.00857.P002	integron_02	complete	1	3	GCF_013388275.1	Escherichia coli
1653	ESCO001.0321.00858.P002	integron_01	complete	1	3	GCF_013389615.1	Escherichia coli
1654	ESCO001.0321.00858.P002	integron_02	complete	2	4	GCF_013389615.1	Escherichia coli
1655	ESCO001.0321.00858.P003	integron_01	In0		1	GCF_013389615.1	Escherichia coli
1656	ESCO001.0321.00859.P002	integron_01	complete	2	4	GCF_013389695.1	Escherichia coli
1657	ESCO001.0321.00864.P002	integron_01	CALIN	3	3	GCF_013402855.1	Escherichia coli
1658	ESCO001.0321.00866.P002	integron_01	complete	1	2	GCF_013423805.1	Escherichia coli
1659	ESCO001.0321.00866.P003	integron_01	CALIN	3	2	GCF_013423805.1	Escherichia coli
1660	ESCO001.0321.00866.P003	integron_02	CALIN	2	3	GCF_013423805.1	Escherichia coli
1661	ESCO001.0321.00867.P002	integron_01	complete	1	2	GCF_013425935.1	Escherichia coli
1662	ESCO001.0321.00867.P002	integron_02	CALIN	2	3	GCF_013425935.1	Escherichia coli
1663	ESCO001.0321.00867.P002	integron_03	CALIN	3	2	GCF_013425935.1	Escherichia coli
1664	ESCO001.0321.00868.P003	integron_01	In0		1	GCF_013425955.1	Escherichia coli
1665	ESCO001.0321.00871.P002	integron_01	complete	2	4	GCF_013426115.1	Escherichia coli
1666	ESCO001.0321.00871.P002	integron_02	CALIN	2	2	GCF_013426115.1	Escherichia coli
1667	ESCO001.0321.00874.P002	integron_01	complete	6	7	GCF_013694285.1	Escherichia coli
1668	ESCO001.0321.00875.P002	integron_01	CALIN	2	3	GCF_013694325.1	Escherichia coli
1669	ESCO001.0321.00876.P002	integron_01	complete	1	2	GCF_013694345.1	Escherichia coli
1670	ESCO001.0321.00876.P003	integron_01	CALIN	3	2	GCF_013694345.1	Escherichia coli
1671	ESCO001.0321.00876.P003	integron_02	CALIN	2	3	GCF_013694345.1	Escherichia coli
1672	ESCO001.0321.00877.P002	integron_01	CALIN	2	2	GCF_013694465.1	Escherichia coli
1673	ESCO001.0321.00881.P002	integron_01	complete	3	4	GCF_014075595.1	Escherichia coli
1674	ESCO001.0321.00884.P003	integron_01	complete	2	4	GCF_014076685.2	Escherichia coli
1675	ESCO001.0321.00886.C001	integron_01	complete	2	4	GCF_014117405.1	Escherichia coli
1676	ESCO001.0321.00886.P002	integron_01	CALIN	4	5	GCF_014117405.1	Escherichia coli
1677	ESCO001.0321.00887.C001	integron_01	complete	3	5	GCF_014157395.1	Escherichia coli
1678	ESCO001.0321.00889.C001	integron_01	complete	2	4	GCF_014162235.1	Escherichia coli
1679	ESCO001.0321.00890.C001	integron_01	In0		1	GCF_014168595.1	Escherichia coli
1680	ESCO001.0321.00890.P002	integron_01	In0		1	GCF_014168595.1	Escherichia coli
1681	ESCO001.0321.00893.C001	integron_01	complete	1	3	GCF_014168755.1	Escherichia coli
1682	ESCO001.0321.00893.C001	integron_02	CALIN	3	4	GCF_014168755.1	Escherichia coli
1683	ESCO001.0321.00894.P002	integron_01	CALIN	2	3	GCF_014168775.1	Escherichia coli
1684	ESCO001.0321.00896.C001	integron_01	complete	2	4	GCF_014168855.1	Escherichia coli
1685	ESCO001.0321.00897.C001	integron_01	complete	2	4	GCF_014168935.1	Escherichia coli
1686	ESCO001.0321.00902.P002	integron_01	CALIN	2	3	GCF_014169095.1	Escherichia coli
1687	ESCO001.0321.00903.P002	integron_01	CALIN	2	3	GCF_014169115.1	Escherichia coli
1688	ESCO001.0321.00903.P002	integron_02	CALIN	2	2	GCF_014169115.1	Escherichia coli
1689	ESCO001.0321.00904.C001	integron_01	CALIN	2	4	GCF_014169155.1	Escherichia coli
1690	ESCO001.0321.00909.P002	integron_01	CALIN	2	3	GCF_014169415.1	Escherichia coli
1691	ESCO001.0321.00912.P002	integron_01	complete	1	3	GCF_014169475.1	Escherichia coli
1692	ESCO001.0321.00913.P002	integron_01	CALIN	2	3	GCF_014169575.1	Escherichia coli
1693	ESCO001.0321.00914.P004	integron_01	CALIN	4	6	GCF_014169595.1	Escherichia coli
1694	ESCO001.0321.00916.C001	integron_01	complete	2	4	GCF_014169695.1	Escherichia coli
1695	ESCO001.0321.00918.C001	integron_01	complete	2	4	GCF_014169855.1	Escherichia coli
1696	ESCO001.0321.00922.C001	integron_01	complete	1	3	GCF_014170615.1	Escherichia coli
1697	ESCO001.0321.00923.P003	integron_01	complete	1	3	GCF_014170675.1	Escherichia coli
1698	ESCO001.0321.00925.P004	integron_01	complete	1	3	GCF_014171015.1	Escherichia coli
1699	ESCO001.0321.00926.P002	integron_01	complete	4	6	GCF_014189395.1	Escherichia coli
1700	ESCO001.0321.00934.C001	integron_01	CALIN	3	4	GCF_014338525.1	Escherichia coli
1701	ESCO001.0321.00934.C001	integron_02	CALIN	3	4	GCF_014338525.1	Escherichia coli
1702	ESCO001.0321.00935.P004	integron_01	complete	6	9	GCF_014361285.1	Escherichia coli
1703	ESCO001.0321.00936.P002	integron_01	In0		1	GCF_014522225.1	Escherichia coli
1704	ESCO001.0321.00938.P002	integron_01	complete	1	3	GCF_014541045.1	Escherichia coli
1705	ESCO001.0321.00941.P002	integron_01	In0		1	GCF_014622725.1	Escherichia coli
1706	ESCO001.0321.00941.P003	integron_01	CALIN	4	6	GCF_014622725.1	Escherichia coli
1707	ESCO001.0321.00944.P002	integron_01	complete	2	4	GCF_014679325.1	Escherichia coli
1708	ESCO001.0321.00948.P005	integron_01	CALIN	2	3	GCF_014826015.1	Escherichia coli
1709	ESCO001.0321.00950.P002	integron_01	In0		1	GCF_014854635.1	Escherichia coli
1710	ESCO001.0321.00969.P002	integron_01	CALIN	2	3	GCF_015136715.1	Escherichia coli
1711	ESCO001.0321.00971.C001	integron_01	CALIN	2	2	GCF_015138575.1	Escherichia coli
1712	ESCO001.0321.00972.P003	integron_01	CALIN	2	3	GCF_015138955.1	Escherichia coli
1713	ESCO001.0321.00973.P002	integron_01	CALIN	2	3	GCF_015139155.1	Escherichia coli
1714	ESCO001.0321.00973.P002	integron_02	CALIN	2	3	GCF_015139155.1	Escherichia coli
1715	ESCO001.0321.00973.P002	integron_03	CALIN	2	3	GCF_015139155.1	Escherichia coli
1716	ESCO001.0321.00973.P002	integron_04	CALIN	2	3	GCF_015139155.1	Escherichia coli
1717	ESCO001.0321.00973.P002	integron_05	CALIN	2	3	GCF_015139155.1	Escherichia coli
1718	ESCO001.0321.00974.C001	integron_01	CALIN	3	4	GCF_015139375.1	Escherichia coli
1719	ESCO001.0321.00974.P002	integron_01	complete	2	5	GCF_015139375.1	Escherichia coli
1720	ESCO001.0321.00975.P002	integron_01	CALIN	2	3	GCF_015139735.1	Escherichia coli
1721	ESCO001.0321.00978.C001	integron_01	complete	1	3	GCF_015508805.1	Escherichia coli
1722	ESCO001.0321.00980.P003	integron_01	complete	2	4	GCF_015571535.1	Escherichia coli
1723	ESCO001.0321.00981.P003	integron_01	complete	1	3	GCF_015571555.1	Escherichia coli
1724	ESCO001.0321.00981.P004	integron_01	complete	2	4	GCF_015571555.1	Escherichia coli
1725	ESCO001.0321.00982.P003	integron_01	complete	1	3	GCF_015571615.1	Escherichia coli
1726	ESCO001.0321.00982.P004	integron_01	complete	2	4	GCF_015571615.1	Escherichia coli
1727	ESCO001.0321.00983.P003	integron_01	complete	2	4	GCF_015571635.1	Escherichia coli
1728	ESCO001.0321.00983.P004	integron_01	complete	1	3	GCF_015571635.1	Escherichia coli
1729	ESCO001.0321.00984.P003	integron_01	complete	1	3	GCF_015571655.1	Escherichia coli
1730	ESCO001.0321.00984.P004	integron_01	complete	2	4	GCF_015571655.1	Escherichia coli
1731	ESCO001.0321.00985.P003	integron_01	complete	2	4	GCF_015571755.1	Escherichia coli
1732	ESCO001.0321.00986.P003	integron_01	complete	1	3	GCF_015571775.1	Escherichia coli
1733	ESCO001.0321.00986.P004	integron_01	complete	2	4	GCF_015571775.1	Escherichia coli
1734	ESCO001.0321.00987.P002	integron_01	complete	2	4	GCF_015571815.1	Escherichia coli
1735	ESCO001.0321.00988.P003	integron_01	complete	2	4	GCF_015571835.1	Escherichia coli
1736	ESCO001.0321.00989.P003	integron_01	complete	1	3	GCF_015571875.1	Escherichia coli
1737	ESCO001.0321.00989.P004	integron_01	complete	2	4	GCF_015571875.1	Escherichia coli
1738	ESCO001.0321.00990.P002	integron_01	complete	2	4	GCF_015571955.1	Escherichia coli
1739	ESCO001.0321.00991.P002	integron_01	CALIN	2	3	GCF_015649805.1	Escherichia coli
1740	ESCO001.0321.00992.P002	integron_01	complete	3	5	GCF_015843075.1	Escherichia coli
1741	ESCO001.0321.00993.P002	integron_01	complete	1	3	GCF_015910185.1	Escherichia coli
1742	ESCO001.0321.00993.P002	integron_02	complete	4	7	GCF_015910185.1	Escherichia coli
1743	ESCO001.0321.01002.C001	integron_01	complete	2	3	GCF_016432785.1	Escherichia coli
1744	ESCO001.0321.01002.C001	integron_02	CALIN	2	3	GCF_016432785.1	Escherichia coli
1745	ESCO001.0321.01003.C001	integron_01	CALIN	2	2	GCF_016432805.1	Escherichia coli
1746	ESCO001.0321.01003.P002	integron_01	complete	1	3	GCF_016432805.1	Escherichia coli
1747	ESCO001.0321.01004.P003	integron_01	complete	1	2	GCF_016446335.1	Escherichia coli
1748	ESCO001.0321.01004.P005	integron_01	complete	2	4	GCF_016446335.1	Escherichia coli
1749	ESCO001.0321.01006.P002	integron_01	CALIN	3	4	GCF_016598635.1	Escherichia coli
1750	ESCO001.0321.01006.P002	integron_02	complete	3	5	GCF_016598635.1	Escherichia coli
1751	ESCO001.0321.01006.P002	integron_03	CALIN	3	4	GCF_016598635.1	Escherichia coli
1752	ESCO001.0321.01007.C001	integron_01	CALIN	2	3	GCF_016629485.1	Escherichia coli
1753	ESCO001.0321.01012.P003	integron_01	complete	1	3	GCF_016767775.1	Escherichia coli
1754	ESCO001.0321.01013.C001	integron_01	complete	5	8	GCF_016772495.1	Escherichia coli
1755	ESCO001.0321.01013.P002	integron_01	complete	1	3	GCF_016772495.1	Escherichia coli
1756	ESCO001.0321.01016.C001	integron_01	complete	2	4	GCF_016775825.1	Escherichia coli
1757	ESCO001.0321.01017.C001	integron_01	complete	2	4	GCF_016775845.1	Escherichia coli
1758	ESCO001.0321.01018.C001	integron_01	complete	2	4	GCF_016775865.1	Escherichia coli
1759	ESCO001.0321.01019.C001	integron_01	complete	2	4	GCF_016775885.1	Escherichia coli
1760	ESCO001.0321.01022.C001	integron_01	CALIN	3	4	GCF_016775945.1	Escherichia coli
1761	ESCO001.0321.01024.C001	integron_01	CALIN	3	4	GCF_016775985.1	Escherichia coli
1762	ESCO001.0321.01026.C001	integron_01	complete	2	4	GCF_016776025.1	Escherichia coli
1763	ESCO001.0321.01027.C001	integron_01	complete	2	4	GCF_016776045.1	Escherichia coli
1764	ESCO001.0321.01029.C001	integron_01	CALIN	3	4	GCF_016776085.1	Escherichia coli
1765	ESCO001.0321.01030.C001	integron_01	complete	2	4	GCF_016776105.1	Escherichia coli
1766	ESCO001.0321.01032.C001	integron_01	complete	2	4	GCF_016776145.1	Escherichia coli
1767	ESCO001.0321.01037.C001	integron_01	complete	2	4	GCF_016776245.1	Escherichia coli
1768	ESCO001.0321.01041.C001	integron_01	CALIN	3	4	GCF_016776325.1	Escherichia coli
1769	ESCO001.0321.01042.C001	integron_01	CALIN	2	2	GCF_016776345.1	Escherichia coli
1770	ESCO001.0321.01042.C001	integron_02	CALIN	3	4	GCF_016776345.1	Escherichia coli
1771	ESCO001.0321.01044.C001	integron_01	complete	2	4	GCF_016776385.1	Escherichia coli
1772	ESCO001.0321.01045.C001	integron_01	complete	2	4	GCF_016779865.1	Escherichia coli
1773	ESCO001.0321.01047.C001	integron_01	complete	2	4	GCF_016780415.1	Escherichia coli
1774	ESCO001.0321.01048.C001	integron_01	complete	2	4	GCF_016780575.1	Escherichia coli
1775	ESCO001.0321.01050.P002	integron_01	CALIN	3	4	GCF_016803855.1	Escherichia coli
1776	ESCO001.0321.01050.P003	integron_01	complete	2	4	GCF_016803855.1	Escherichia coli
1777	ESCO001.0321.01050.P003	integron_02	CALIN	2	2	GCF_016803855.1	Escherichia coli
1778	ESCO001.0321.01053.P002	integron_01	CALIN	4	6	GCF_016806005.1	Escherichia coli
1779	ESCO001.0321.01053.P002	integron_02	complete	6	7	GCF_016806005.1	Escherichia coli
1780	ESCO001.0321.01055.P002	integron_01	complete	6	6	GCF_016806045.1	Escherichia coli
1781	ESCO001.0321.01055.P003	integron_01	complete	3	5	GCF_016806045.1	Escherichia coli
1782	ESCO001.0321.01057.P002	integron_01	complete	2	4	GCF_016888925.1	Escherichia coli
1783	ESCO001.0321.01061.P002	integron_01	CALIN	3	4	GCF_016889085.1	Escherichia coli
1784	ESCO001.0321.01068.P002	integron_01	complete	6	7	GCF_016889505.1	Escherichia coli
1785	ESCO001.0321.01068.P002	integron_02	CALIN	2	3	GCF_016889505.1	Escherichia coli
1786	ESCO001.0321.01068.P002	integron_03	CALIN	4	6	GCF_016889505.1	Escherichia coli
1787	ESCO001.0321.01068.P004	integron_01	CALIN	2	3	GCF_016889505.1	Escherichia coli
1788	ESCO001.0321.01069.P002	integron_01	complete	6	7	GCF_016889525.1	Escherichia coli
1789	ESCO001.0321.01070.P002	integron_01	complete	6	7	GCF_016889545.1	Escherichia coli
1790	ESCO001.0321.01070.P002	integron_02	In0		1	GCF_016889545.1	Escherichia coli
1791	ESCO001.0321.01071.P002	integron_01	complete	6	7	GCF_016889565.1	Escherichia coli
1792	ESCO001.0321.01071.P002	integron_02	CALIN	2	2	GCF_016889565.1	Escherichia coli
1793	ESCO001.0321.01076.C001	integron_01	CALIN	3	4	GCF_016889845.1	Escherichia coli
1794	ESCO001.0321.01078.P002	integron_01	complete	2	4	GCF_016889905.1	Escherichia coli
1795	ESCO001.0321.01079.P002	integron_01	CALIN	3	3	GCF_016890005.1	Escherichia coli
1796	ESCO001.0321.01079.P002	integron_02	In0		1	GCF_016890005.1	Escherichia coli
1797	ESCO001.0321.01080.C001	integron_01	CALIN	2	2	GCF_016890045.1	Escherichia coli
1798	ESCO001.0321.01081.P002	integron_01	CALIN	2	2	GCF_016890105.1	Escherichia coli
1799	ESCO001.0321.01082.P002	integron_01	CALIN	2	3	GCF_016903275.1	Escherichia coli
1800	ESCO001.0321.01082.P004	integron_01	complete	1	3	GCF_016903275.1	Escherichia coli
1801	ESCO001.0321.01086.C001	integron_01	CALIN	3	4	GCF_016903435.1	Escherichia coli
1802	ESCO001.0321.01090.P002	integron_01	CALIN	2	3	GCF_016903815.1	Escherichia coli
1803	ESCO001.0321.01090.P002	integron_02	CALIN	2	3	GCF_016903815.1	Escherichia coli
1804	ESCO001.0321.01093.C001	integron_01	CALIN	3	4	GCF_016903915.1	Escherichia coli
1805	ESCO001.0321.01100.P002	integron_01	complete	3	5	GCF_016904195.1	Escherichia coli
1806	ESCO001.0321.01103.P002	integron_01	CALIN	2	3	GCF_016904335.1	Escherichia coli
1807	ESCO001.0321.01104.P002	integron_01	CALIN	2	2	GCF_016904395.1	Escherichia coli
1808	ESCO001.0321.01108.P002	integron_01	complete	2	4	GCF_016904495.1	Escherichia coli
1809	ESCO001.0321.01108.P002	integron_02	CALIN	2	2	GCF_016904495.1	Escherichia coli
1810	ESCO001.0321.01109.P002	integron_01	complete	2	4	GCF_016904535.1	Escherichia coli
1811	ESCO001.0321.01110.C001	integron_01	CALIN	3	4	GCF_016904555.1	Escherichia coli
1812	ESCO001.0321.01111.C001	integron_01	complete	3	5	GCF_016904575.1	Escherichia coli
1813	ESCO001.0321.01115.P002	integron_01	complete	1	3	GCF_016939795.1	Escherichia coli
1814	ESCO001.0321.01115.P003	integron_01	complete	4	6	GCF_016939795.1	Escherichia coli
1815	ESCO001.0321.01115.P004	integron_01	CALIN	3	3	GCF_016939795.1	Escherichia coli
1816	ESCO001.0321.01116.P003	integron_01	In0		1	GCF_016942475.1	Escherichia coli
1817	ESCO001.0321.01116.P003	integron_02	complete	3	4	GCF_016942475.1	Escherichia coli
1818	ESCO001.0321.01119.C001	integron_01	CALIN	2	2	GCF_016942575.1	Escherichia coli
1819	ESCO001.0321.01119.P003	integron_01	complete	2	4	GCF_016942575.1	Escherichia coli
1820	ESCO001.0321.01123.C001	integron_01	CALIN	2	2	GCF_016942655.1	Escherichia coli
1821	ESCO001.0321.01123.P002	integron_01	CALIN	3	4	GCF_016942655.1	Escherichia coli
1822	ESCO001.0321.01124.C001	integron_01	complete	6	8	GCF_016944635.1	Escherichia coli
1823	ESCO001.0321.01125.P002	integron_01	complete	1	3	GCF_016944655.1	Escherichia coli
1824	ESCO001.0321.01125.P002	integron_02	complete	6	8	GCF_016944655.1	Escherichia coli
1825	ESCO001.0321.01126.P003	integron_01	complete	6	7	GCF_016944675.1	Escherichia coli
1826	ESCO001.0321.01127.P002	integron_01	In0		1	GCF_016944695.1	Escherichia coli
1827	ESCO001.0321.01128.P002	integron_01	complete	6	7	GCF_016944715.1	Escherichia coli
1828	ESCO001.0321.01129.P002	integron_01	complete	4	5	GCF_016944735.1	Escherichia coli
1829	ESCO001.0321.01130.P002	integron_01	CALIN	2	3	GCF_016944755.1	Escherichia coli
1830	ESCO001.0321.01131.P002	integron_01	CALIN	6	6	GCF_016944775.1	Escherichia coli
1831	ESCO001.0321.01132.P002	integron_01	CALIN	3	3	GCF_017088405.1	Escherichia coli
1832	ESCO001.0321.01133.C001	integron_01	complete	3	4	GCF_017088425.1	Escherichia coli
1833	ESCO001.0321.01133.P002	integron_01	CALIN	3	3	GCF_017088425.1	Escherichia coli
1834	ESCO001.0321.01136.P002	integron_01	CALIN	3	3	GCF_017088485.1	Escherichia coli
1835	ESCO001.0321.01136.P002	integron_02	complete	1	3	GCF_017088485.1	Escherichia coli
1836	ESCO001.0321.01137.P002	integron_01	CALIN	2	2	GCF_017161035.1	Escherichia coli
1837	ESCO001.0321.01138.P002	integron_01	CALIN	4	6	GCF_017161345.1	Escherichia coli
1838	ESCO001.0321.01138.P002	integron_02	complete	1	2	GCF_017161345.1	Escherichia coli
1839	ESCO001.0321.01149.P003	integron_01	complete	1	3	GCF_900497095.1	Escherichia coli
1840	ESCO001.0321.01151.P002	integron_01	complete	1	3	GCF_900497455.1	Escherichia coli
1841	ESCO001.0321.01151.P002	integron_02	CALIN	3	3	GCF_900497455.1	Escherichia coli
1842	ESCO001.0321.01151.P002	integron_03	CALIN	3	2	GCF_900497455.1	Escherichia coli
1843	ESCO001.0321.01152.P002	integron_01	complete	2	4	GCF_900497485.1	Escherichia coli
1844	ESCO001.0321.01153.P002	integron_01	complete	2	4	GCF_900520285.1	Escherichia coli
1845	ESCO001.0321.01155.P002	integron_01	CALIN	2	3	GCF_900520325.1	Escherichia coli
1846	ESCO001.0321.01156.P003	integron_01	CALIN	2	2	GCF_900520345.1	Escherichia coli
1847	ESCO001.0321.01156.P003	integron_02	complete	2	4	GCF_900520345.1	Escherichia coli
1848	ESCO001.0321.01157.C001	integron_01	CALIN	2	2	GCF_900520365.1	Escherichia coli
1849	ESCO001.0321.01158.P004	integron_01	CALIN	3	4	GCF_900520385.1	Escherichia coli
1850	ESCO001.0321.01159.P002	integron_01	CALIN	2	2	GCF_900520395.1	Escherichia coli
1851	ESCO001.0321.01159.P002	integron_02	complete	2	4	GCF_900520395.1	Escherichia coli
1852	ESCO001.0321.01161.P002	integron_01	complete	2	4	GCF_900622635.1	Escherichia coli
1853	ESCO001.0321.01161.P002	integron_02	CALIN	2	2	GCF_900622635.1	Escherichia coli
1854	ESCO001.0321.01162.P002	integron_01	CALIN	2	3	GCF_900622655.1	Escherichia coli
1855	ESCO001.0321.01163.P002	integron_01	complete	1	3	GCF_900622665.1	Escherichia coli
1856	ESCO001.0321.01163.P002	integron_02	CALIN	3	3	GCF_900622665.1	Escherichia coli
1857	ESCO001.0321.01196.P002	integron_01	complete	2	4	GCF_901733115.1	Escherichia coli
1858	ESCO001.0321.01196.P002	integron_02	CALIN	2	2	GCF_901733115.1	Escherichia coli
1859	ESCO001.0321.01215.P002	integron_01	CALIN	2	3	GCF_904711295.1	Escherichia coli
1860	ESCO001.0321.01215.P004	integron_01	complete	1	3	GCF_904711295.1	Escherichia coli
1861	ESCO001.0321.01216.P002	integron_01	complete	1	3	GCF_904711305.1	Escherichia coli
1862	ESCO001.0321.01222.P002	integron_01	complete	2	4	GCF_904831835.1	Escherichia coli
1863	ESCO001.0321.01227.P006	integron_01	complete	1	3	GCF_904863235.1	Escherichia coli
1864	ESCO001.0321.01228.P002	integron_01	CALIN	2	3	GCF_904863255.1	Escherichia coli
1865	ESCO001.0321.01229.P002	integron_01	CALIN	2	3	GCF_904863305.1	Escherichia coli
1866	ESCO001.0321.01230.C001	integron_01	In0		1	GCF_904863375.1	Escherichia coli
1867	ESCO001.0321.01230.C001	integron_02	In0		1	GCF_904863375.1	Escherichia coli
1868	ESCO001.0321.01230.P002	integron_01	CALIN	2	3	GCF_904863375.1	Escherichia coli
1869	ESCO001.0321.01231.P002	integron_01	CALIN	2	2	GCF_904863385.1	Escherichia coli
1870	ESCO001.0321.01231.P002	integron_02	complete	2	4	GCF_904863385.1	Escherichia coli
1871	ESCO001.0321.01232.P003	integron_01	complete	3	5	GCF_904863445.1	Escherichia coli
1872	ESCO001.0321.01233.P002	integron_01	CALIN	2	3	GCF_904864555.1	Escherichia coli
1873	ESCO001.0321.01234.P002	integron_01	CALIN	2	3	GCF_904864615.1	Escherichia coli
1874	ESCO001.0321.01236.P002	integron_01	CALIN	3	4	GCF_904865655.1	Escherichia coli
1875	ESCO001.0321.01236.P002	integron_02	In0		1	GCF_904865655.1	Escherichia coli
1876	ESCO001.0321.01238.P002	integron_01	complete	1	3	GCF_904866225.1	Escherichia coli
1877	ESCO001.0321.01239.P003	integron_01	complete	6	7	GCF_904866305.1	Escherichia coli
1878	ESCO001.0321.01240.P002	integron_01	CALIN	2	3	GCF_904866345.1	Escherichia coli
1879	ESCO001.0321.01244.C001	integron_01	In0		1	GCF_905071865.1	Escherichia coli
1880	ESCO001.0321.01261.P002	integron_01	complete	2	3	GCF_009832885.1	Escherichia coli K-12
1881	ESCO001.0321.01324.P002	integron_01	complete	1	3	GCF_013167935.1	Escherichia coli O157:H7
1882	ESCO001.0321.01324.P003	integron_01	complete	1	3	GCF_013167935.1	Escherichia coli O157:H7
1883	ESCO001.0321.01388.C001	integron_01	complete	1	3	GCF_000027125.1	Escherichia coli 042
1884	ESCO001.0321.01406.P002	integron_01	complete	1	3	GCF_000014845.1	Escherichia coli APEC O1
1885	ESCO001.0321.01410.P002	integron_01	In0		1	GCF_000019645.1	Escherichia coli SMS-3-5
1886	ESCO001.0321.01410.P002	integron_02	CALIN	3	4	GCF_000019645.1	Escherichia coli SMS-3-5
1887	ESCO001.0321.01454.P002	integron_01	complete	2	4	GCF_000183345.1	Escherichia coli O83:H1 str. NRG 857C
1888	ESCO001.0321.01455.P002	integron_01	complete	4	6	GCF_000212715.2	Escherichia coli UMNK88
1889	ESCO001.0321.01466.C001	integron_01	CALIN	4	5	GCF_000827105.1	Escherichia coli O157:H16
1890	ESCO001.0321.01466.C001	integron_02	complete	3	5	GCF_000827105.1	Escherichia coli O157:H16
1891	ESCO001.0321.01467.P003	integron_01	complete	2	4	GCF_015571855.1	Escherichia coli O157:H16
1892	ESCO001.0321.01468.P002	integron_01	CALIN	2	3	GCF_001874485.1	Escherichia coli O25b:H4
1893	ESCO001.0321.01468.P002	integron_02	CALIN	2	2	GCF_001874485.1	Escherichia coli O25b:H4
1894	ESCO001.0321.01469.P002	integron_01	complete	2	4	GCF_000285655.3	Escherichia coli O25b:H4-ST131
1895	ESCO001.0321.01469.P002	integron_02	CALIN	2	2	GCF_000285655.3	Escherichia coli O25b:H4-ST131
1896	ESCO001.0321.01470.P002	integron_01	CALIN	2	3	GCF_014217135.1	Escherichia coli O25b:H4-ST131
1897	ESCO001.0321.01471.P002	integron_01	CALIN	2	3	GCF_014217155.1	Escherichia coli O25b:H4-ST131
1898	ESCO001.0321.01477.P002	integron_01	In0		1	GCF_000219515.2	Escherichia coli PCN033
1899	ESCO001.0321.01478.C001	integron_01	complete	1	3	GCF_002209105.2	Escherichia coli O104:H4
1900	ESCO001.0321.01479.C001	integron_01	complete	1	3	GCF_002983645.1	Escherichia coli O104:H4
1901	ESCO001.0321.01480.C001	integron_01	complete	1	3	GCF_005014075.1	Escherichia coli O104:H4
1902	ESCO001.0321.01481.P002	integron_01	CALIN	2	3	GCF_001650275.1	Escherichia coli O157
1903	ESCO001.0321.01481.P002	integron_02	complete	6	6	GCF_001650275.1	Escherichia coli O157
1904	ESCO001.0321.01486.P002	integron_01	complete	1	3	GCF_008727155.1	Escherichia coli O157
1905	ESCO001.0321.01489.C001	integron_01	complete	1	3	GCF_000986765.1	Escherichia coli O104:H4 str. C227-11
1906	ESCO001.0321.01513.C001	integron_01	complete	1	3	GCF_000299455.1	Escherichia coli O104:H4 str. 2011C-3493
1907	ESCO001.0321.01514.C001	integron_01	complete	1	3	GCF_000299475.1	Escherichia coli O104:H4 str. 2009EL-2071
1908	ESCO001.0321.01515.C001	integron_01	complete	1	3	GCF_000299255.1	Escherichia coli O104:H4 str. 2009EL-2050
1909	ESCO001.0321.01531.P002	integron_01	CALIN	2	2	GCF_000493755.1	Escherichia coli JJ1886
1910	ESCO001.0321.01532.P003	integron_01	CALIN	2	2	GCF_001593565.1	Escherichia coli JJ1887
1911	ESCO001.0321.01533.P002	integron_01	complete	1	2	GCF_001029125.1	Escherichia coli PCN061
1912	ESCO001.0321.01538.P002	integron_01	CALIN	4	5	GCF_001610755.1	Escherichia coli str. Sanji
1913	ESCO001.0321.01538.P002	integron_02	complete	6	7	GCF_001610755.1	Escherichia coli str. Sanji
1914	ESCO001.0321.01552.P003	integron_01	CALIN	2	3	GCF_002741475.1	Escherichia coli O27:H7
1915	ESCO001.0321.01553.P002	integron_01	CALIN	2	3	GCF_016756455.1	Escherichia coli O25:H4
1916	ESCO001.0321.01554.P003	integron_01	complete	3	5	GCF_004771135.1	Escherichia coli O18:H1
1917	ESCO001.0321.01556.P003	integron_01	complete	2	4	GCF_015571735.1	Escherichia coli O39:H21
1918	ESCO001.0321.01562.P002	integron_01	complete	1	2	GCF_008124165.1	Escherichia coli O16:H48
1919	ESCO001.0321.01563.P002	integron_01	complete	1	2	GCF_008124185.1	Escherichia coli O16:H48
1920	ESCO001.0321.01575.P003	integron_01	complete	3	5	GCF_008124005.1	Escherichia coli O80:H26
1921	ESCO001.0321.01582.P002	integron_01	complete	2	4	GCF_015571795.1	Escherichia coli O100:H21
1922	ESCO001.0321.01583.P004	integron_01	complete	2	4	GCF_015571915.1	Escherichia coli O112ab:H8
1923	ESCO001.0321.01584.P002	integron_01	complete	2	4	GCF_015571895.1	Escherichia coli O152:H23
1924	ESCO001.0321.01585.P002	integron_01	complete	2	4	GCF_015571595.1	Escherichia coli O167:H26
1925	ESCO001.0321.01586.P002	integron_01	complete	1	3	GCF_015571715.1	Escherichia coli O20:H12
1926	ESFE001.0321.00001.P002	integron_01	complete	3	5	GCF_003944565.2	Escherichia fergusonii
1927	ESFE001.0321.00001.P005	integron_01	CALIN	4	4	GCF_003944565.2	Escherichia fergusonii
1928	ESFE001.0321.00001.P006	integron_01	CALIN	4	1	GCF_003944565.2	Escherichia fergusonii
1929	ESFE001.0321.00005.P002	integron_01	CALIN	4	6	GCF_013171325.1	Escherichia fergusonii
1930	ESFE001.0321.00006.P002	integron_01	complete	1	3	GCF_013591455.1	Escherichia fergusonii
1931	ESFE001.0321.00006.P003	integron_01	complete	1	2	GCF_013591455.1	Escherichia fergusonii
1932	ESFE001.0321.00007.P002	integron_01	CALIN	6	6	GCF_013596835.1	Escherichia fergusonii
1933	ESFE001.0321.00007.P002	integron_02	complete	3	5	GCF_013596835.1	Escherichia fergusonii
1934	ESFE001.0321.00024.P002	integron_01	CALIN	6	6	GCF_013825725.1	Escherichia fergusonii
1935	ESFE001.0321.00024.P002	integron_02	complete	3	5	GCF_013825725.1	Escherichia fergusonii
1936	ESFE001.0321.00025.P002	integron_01	CALIN	6	6	GCF_013829265.1	Escherichia fergusonii
1937	ESFE001.0321.00025.P002	integron_02	complete	3	5	GCF_013829265.1	Escherichia fergusonii
1938	ESFE001.0321.00038.P002	integron_01	complete	6	7	GCF_013923185.1	Escherichia fergusonii
1939	ESSP002.0321.00001.P002	integron_01	complete	6	7	GCF_012584495.1	Escherichia sp. SCLE84
1940	FEAM001.0321.00001.C001	integron_01	complete	5	9	GCF_000974685.2	Ferriphaselus amnicola
1941	FEBA001.0321.00001.C001	integron_01	CALIN	2	3	GCF_000148645.1	Ferrimonas balearica DSM 9799
1942	FELI001.0321.00001.C001	integron_01	CALIN	2	4	GCF_012295575.1	Ferrimonas lipolytica
1943	FELI001.0321.00001.C001	integron_02	complete	5	11	GCF_012295575.1	Ferrimonas lipolytica
1944	FELI001.0321.00001.C001	integron_03	CALIN	4	7	GCF_012295575.1	Ferrimonas lipolytica
1945	FLPH001.0321.00001.C001	integron_01	CALIN	2	4	GCF_009938305.1	Fluviibacter phosphoraccumulans
1946	FLPH001.0321.00001.C001	integron_02	In0		1	GCF_009938305.1	Fluviibacter phosphoraccumulans
1947	FLPH001.0321.00002.C001	integron_01	complete	4	8	GCF_009938325.1	Fluviibacter phosphoraccumulans
1948	FLPH001.0321.00002.C001	integron_02	CALIN	2	4	GCF_009938325.1	Fluviibacter phosphoraccumulans
1949	FLSI001.0321.00001.C001	integron_01	CALIN	2	3	GCF_000218625.1	Flexistipes sinusarabici DSM 4947
1950	FRPH001.0321.00003.C001	integron_01	complete	1	3	GCF_000833255.1	Francisella philomiragia
1951	FRTU002.0321.00001.C001	integron_01	CALIN	16	10	GCF_013128195.2	Frigoriglobus tundricola
1952	FRTU002.0321.00001.C001	integron_02	complete	16	13	GCF_013128195.2	Frigoriglobus tundricola
1953	FUMA001.0321.00001.C001	integron_01	complete	2	7	GCF_001983935.1	Fuerstia marisgermanicae
1954	FUMA001.0321.00001.C001	integron_02	CALIN	5	2	GCF_001983935.1	Fuerstia marisgermanicae
1955	GACA001.0321.00001.C001	integron_01	CALIN	9	12	GCF_000145255.1	Gallionella capsiferriformans ES-2
1956	GACA001.0321.00001.C001	integron_02	CALIN	2	3	GCF_000145255.1	Gallionella capsiferriformans ES-2
1957	GEAU001.0321.00001.C001	integron_01	complete	3	6	GCF_000010305.1	Gemmatimonas aurantiaca T-27
1958	GEKA002.0321.00001.C001	integron_01	CALIN	8	9	GCF_000522985.1	Gemmatirosa kalamazoonesis
1959	GEKA002.0321.00001.P002	integron_01	complete	79	70	GCF_000522985.1	Gemmatirosa kalamazoonesis
1960	GELO001.0321.00001.C001	integron_01	In0		1	GCF_000020385.1	Geobacter lovleyi SZ
1961	GELO001.0321.00001.C001	integron_02	In0		1	GCF_000020385.1	Geobacter lovleyi SZ
1962	GEMA001.0321.00001.C001	integron_01	CALIN	6	8	GCF_901538265.1	Gemmata massiliana
1963	GEME001.0321.00001.C001	integron_01	In0		1	GCF_000012925.1	Geobacter metallireducens GS-15
1964	GEME001.0321.00001.C001	integron_02	complete	1	4	GCF_000012925.1	Geobacter metallireducens GS-15
1965	GEOB001.0321.00001.C001	integron_01	CALIN	39	27	GCF_003149495.1	Gemmata obscuriglobus
1966	GEOB001.0321.00001.C001	integron_02	CALIN	47	15	GCF_003149495.1	Gemmata obscuriglobus
1967	GEOB001.0321.00001.C001	integron_03	CALIN	133	83	GCF_003149495.1	Gemmata obscuriglobus
1968	GEOB001.0321.00001.C001	integron_04	CALIN	48	36	GCF_003149495.1	Gemmata obscuriglobus
1969	GEOB001.0321.00001.C001	integron_05	complete	78	43	GCF_003149495.1	Gemmata obscuriglobus
1970	GEOB001.0321.00002.C001	integron_01	complete	78	44	GCF_008065095.1	Gemmata obscuriglobus
1971	GEOB001.0321.00002.C001	integron_02	CALIN	48	36	GCF_008065095.1	Gemmata obscuriglobus
1972	GEOB001.0321.00002.C001	integron_03	CALIN	133	83	GCF_008065095.1	Gemmata obscuriglobus
1973	GEOB001.0321.00002.C001	integron_04	CALIN	47	15	GCF_008065095.1	Gemmata obscuriglobus
1974	GEOB001.0321.00002.C001	integron_05	CALIN	39	27	GCF_008065095.1	Gemmata obscuriglobus
1975	GESP018.0321.00001.C001	integron_01	complete	1	2	GCF_013004105.1	Gemmatimonas sp. TET16
1976	GESP018.0321.00001.C001	integron_02	CALIN	3	6	GCF_013004105.1	Gemmatimonas sp. TET16
1977	GESU002.0321.00002.C001	integron_01	complete	1	5	GCF_000007985.2	Geobacter sulfurreducens PCA
1978	GESU002.0321.00003.C001	integron_01	In0		1	GCF_000210155.1	Geobacter sulfurreducens KN400
1979	GESU003.0321.00001.C001	integron_01	CALIN	4	8	GCF_000827125.1	Geoalkalibacter subterraneus
1980	GESU003.0321.00001.C001	integron_02	CALIN	2	6	GCF_000827125.1	Geoalkalibacter subterraneus
1981	GESU003.0321.00001.C001	integron_03	complete	1	3	GCF_000827125.1	Geoalkalibacter subterraneus
1982	GEUR001.0321.00001.C001	integron_01	In0		1	GCF_000016745.1	Geobacter uraniireducens Rf4
1983	GLPR001.0321.00001.P002	integron_01	CALIN	2	3	GCF_016894325.1	Glutamicibacter protophormiae
1984	GRAN001.0321.00001.C001	integron_01	CALIN	2	6	GCF_002215215.1	Granulosicoccus antarcticus IMCC3135
1985	GRHO001.0321.00001.C001	integron_01	In0		1	GCF_001558255.2	Grimontia hollisae
1986	GRHO001.0321.00004.C001	integron_01	In0		1	GCF_009764155.1	Grimontia hollisae
1987	GYSU001.0321.00001.C001	integron_01	CALIN	3	5	GCF_000940805.1	Gynuella sunshinyii YC6258
1988	GYSU001.0321.00001.C001	integron_02	CALIN	8	14	GCF_000940805.1	Gynuella sunshinyii YC6258
1989	GYSU001.0321.00001.C001	integron_03	CALIN	4	12	GCF_000940805.1	Gynuella sunshinyii YC6258
1990	GYSU001.0321.00001.C001	integron_04	CALIN	8	16	GCF_000940805.1	Gynuella sunshinyii YC6258
1991	GYSU001.0321.00001.C001	integron_05	CALIN	2	2	GCF_000940805.1	Gynuella sunshinyii YC6258
1992	GYSU001.0321.00001.C001	integron_06	CALIN	5	7	GCF_000940805.1	Gynuella sunshinyii YC6258
1993	GYSU001.0321.00001.C001	integron_07	CALIN	9	15	GCF_000940805.1	Gynuella sunshinyii YC6258
1994	HAAL002.0321.00001.C001	integron_01	CALIN	2	3	GCF_003612795.1	Halomonas alkaliphila
1995	HABI001.0321.00001.C001	integron_01	complete	5	6	GCF_003346815.1	Halarcobacter bivalviorum
1996	HACA001.0321.00001.C001	integron_01	CALIN	4	6	GCF_000696485.1	Halomonas campaniensis
1997	HACA002.0321.00001.C001	integron_01	CALIN	2	4	GCF_015992245.1	Halomonas campisalis
1998	HACA002.0321.00001.C001	integron_02	CALIN	4	7	GCF_015992245.1	Halomonas campisalis
[truncated: 4,078 more rows]
