# Supplementary material for: IntegronFinder 2.0: Identification and Analysis of Integrons across Bacteria, with a Focus on Antibiotic Resistance in Klebsiella
Source: Microorganisms. 2022 Mar 24;10(4):700. doi: 10.3390/microorganisms10040700 (PMC9024848; doi:10.3390/microorganisms10040700)
Supplement: Supplementary file 1 [file microorganisms-10-00700-s001.zip › table_s4.xlsx]

## Sheet: Sheet1
	contig_name	integron_in_contig_id	integron_type	#attC	#protein	assembly_id
0	KLPN.1018.00009.0001	integron_01	complete	1	3	GCF_002269295.1
1	KLPN.1018.00022.0001	integron_01	complete	1	3	GCF_002278055.1
2	KLPN.1018.00023.0001	integron_01	CALIN	2	2	GCF_001463165.1
3	KLPN.1018.00023.0001	integron_02	CALIN	2	3	GCF_001463165.1
4	KLPN.1018.00025.0001	integron_01	complete	3	4	GCF_002209405.1
5	KLPN.1018.00026.0001	integron_01	CALIN	3	3	GCF_001611095.1
6	KLPN.1018.00037.0002	integron_01	complete	5	8	GCF_001663195.1
7	KLPN.1018.00038.0001	integron_01	complete	1	3	GCF_002893825.1
8	KLPN.1018.00039.0001	integron_01	complete	1	3	GCF_003367555.1
9	KLPN.1018.00039.0001	integron_02	complete	4	6	GCF_003367555.1
10	KLPN.1018.00040.0002	integron_01	complete	1	4	GCF_001952835.1
11	KLPN.1018.00041.0002	integron_01	complete	1	1	GCF_003597715.1
12	KLPN.1018.00043.0002	integron_01	complete	1	1	GCF_003186535.1
13	KLPN.1018.00043.0002	integron_02	CALIN	2	3	GCF_003186535.1
14	KLPN.1018.00043.0002	integron_03	complete	1	2	GCF_003186535.1
15	KLPN.1018.00043.0002	integron_04	CALIN	2	3	GCF_003186535.1
16	KLPN.1018.00043.0002	integron_05	CALIN	2	3	GCF_003186535.1
17	KLPN.1018.00048.0001	integron_01	complete	1	3	GCF_002951555.1
18	KLPN.1018.00048.0002	integron_01	complete	2	4	GCF_002951555.1
19	KLPN.1018.00053.0002	integron_01	CALIN	2	3	GCF_900451675.1
20	KLPN.1018.00054.0002	integron_01	complete	5	8	GCF_001902435.1
21	KLPN.1018.00054.0002	integron_02	complete	3	8	GCF_001902435.1
22	KLPN.1018.00055.0002	integron_01	CALIN	2	3	GCF_003225855.1
23	KLPN.1018.00055.0002	integron_02	complete	1	2	GCF_003225855.1
24	KLPN.1018.00056.0002	integron_01	complete	3	6	GCF_002257935.3
25	KLPN.1018.00057.0001	integron_01	In0		1	GCF_002833425.1
26	KLPN.1018.00057.0001	integron_02	CALIN	2	3	GCF_002833425.1
27	KLPN.1018.00057.0002	integron_01	complete	2	4	GCF_002833425.1
28	KLPN.1018.00060.0001	integron_01	CALIN	2	3	GCF_003574275.1
29	KLPN.1018.00060.0001	integron_02	CALIN	2	2	GCF_003574275.1
30	KLPN.1018.00060.0001	integron_03	complete	3	4	GCF_003574275.1
31	KLPN.1018.00060.0003	integron_01	CALIN	2	4	GCF_003574275.1
32	KLPN.1018.00062.0001	integron_01	complete	3	4	GCF_003071305.1
33	KLPN.1018.00062.0002	integron_01	complete	1	3	GCF_003071305.1
34	KLPN.1018.00062.0003	integron_01	complete	1	2	GCF_003071305.1
35	KLPN.1018.00064.0002	integron_01	complete	1	2	GCF_003597695.1
36	KLPN.1018.00065.0002	integron_01	CALIN	2	3	GCF_001902355.1
37	KLPN.1018.00065.0002	integron_02	CALIN	3	2	GCF_001902355.1
38	KLPN.1018.00066.0002	integron_01	complete	3	4	GCF_003181135.1
39	KLPN.1018.00066.0002	integron_02	CALIN	2	3	GCF_003181135.1
40	KLPN.1018.00069.0002	integron_01	complete	1	2	GCF_003076555.1
41	KLPN.1018.00069.0002	integron_02	complete	1	2	GCF_003076555.1
42	KLPN.1018.00071.0001	integron_01	complete	1	3	GCF_003030045.1
43	KLPN.1018.00071.0002	integron_01	complete	3	4	GCF_003030045.1
44	KLPN.1018.00072.0001	integron_01	complete	1	3	GCF_002951595.1
45	KLPN.1018.00072.0003	integron_01	complete	2	4	GCF_002951595.1
46	KLPN.1018.00072.0003	integron_02	CALIN	2	3	GCF_002951595.1
47	KLPN.1018.00076.0001	integron_01	CALIN	2	3	GCF_002948565.1
48	KLPN.1018.00076.0001	integron_02	CALIN	2	2	GCF_002948565.1
49	KLPN.1018.00076.0003	integron_01	CALIN	3	5	GCF_002948565.1
50	KLPN.1018.00076.0003	integron_02	CALIN	2	4	GCF_002948565.1
51	KLPN.1018.00076.0003	integron_03	In0		1	GCF_002948565.1
52	KLPN.1018.00079.0002	integron_01	complete	3	6	GCF_003054385.1
53	KLPN.1018.00083.0001	integron_01	CALIN	2	3	GCF_003267985.1
54	KLPN.1018.00083.0001	integron_02	CALIN	2	2	GCF_003267985.1
55	KLPN.1018.00083.0002	integron_01	complete	3	4	GCF_003267985.1
56	KLPN.1018.00083.0002	integron_02	CALIN	2	4	GCF_003267985.1
57	KLPN.1018.00083.0002	integron_03	complete	3	6	GCF_003267985.1
58	KLPN.1018.00084.0001	integron_01	complete	4	7	GCF_003571545.1
59	KLPN.1018.00084.0002	integron_01	complete	1	2	GCF_003571545.1
60	KLPN.1018.00084.0002	integron_02	complete	4	6	GCF_003571545.1
61	KLPN.1018.00084.0002	integron_03	CALIN	2	3	GCF_003571545.1
62	KLPN.1018.00086.0001	integron_01	CALIN	2	3	GCF_003574235.1
63	KLPN.1018.00086.0001	integron_02	CALIN	2	2	GCF_003574235.1
64	KLPN.1018.00086.0002	integron_01	complete	3	4	GCF_003574235.1
65	KLPN.1018.00086.0002	integron_02	complete	1	2	GCF_003574235.1
66	KLPN.1018.00086.0002	integron_03	CALIN	2	3	GCF_003574235.1
67	KLPN.1018.00087.0001	integron_01	complete	3	4	GCF_001704235.1
68	KLPN.1018.00087.0002	integron_01	complete	1	3	GCF_001704235.1
69	KLPN.1018.00087.0002	integron_02	complete	1	1	GCF_001704235.1
70	KLPN.1018.00087.0003	integron_01	complete	2	4	GCF_001704235.1
71	KLPN.1018.00088.0002	integron_01	complete	3	6	GCF_000739495.1
72	KLPN.1018.00088.0003	integron_01	CALIN	2	3	GCF_000739495.1
73	KLPN.1018.00089.0001	integron_01	complete	4	6	GCF_900451875.1
74	KLPN.1018.00091.0001	integron_01	CALIN	2	3	GCF_001316565.3
75	KLPN.1018.00091.0002	integron_01	complete	1	2	GCF_001316565.3
76	KLPN.1018.00092.0001	integron_01	CALIN	2	3	GCF_001307175.1
77	KLPN.1018.00092.0001	integron_02	CALIN	2	2	GCF_001307175.1
78	KLPN.1018.00092.0002	integron_01	complete	3	4	GCF_001307175.1
79	KLPN.1018.00094.0002	integron_01	complete	3	3	GCF_001521895.1
80	KLPN.1018.00096.0002	integron_01	complete	1	2	GCF_000784945.1
81	KLPN.1018.00096.0002	integron_02	CALIN	3	5	GCF_000784945.1
82	KLPN.1018.00098.0002	integron_01	CALIN	2	3	GCF_001908895.1
83	KLPN.1018.00098.0002	integron_02	complete	1	2	GCF_001908895.1
84	KLPN.1018.00099.0001	integron_01	CALIN	2	3	GCF_003226115.1
85	KLPN.1018.00099.0001	integron_02	In0		1	GCF_003226115.1
86	KLPN.1018.00100.0002	integron_01	complete	1	1	GCF_001952875.1
87	KLPN.1018.00100.0002	integron_02	CALIN	2	2	GCF_001952875.1
88	KLPN.1018.00101.0002	integron_01	complete	3	4	GCF_000445405.1
89	KLPN.1018.00102.0001	integron_01	complete	3	4	GCF_001471625.1
90	KLPN.1018.00103.0002	integron_01	CALIN	2	4	GCF_002202275.1
91	KLPN.1018.00103.0002	integron_02	complete	2	4	GCF_002202275.1
92	KLPN.1018.00104.0003	integron_01	complete	3	4	GCF_000709225.1
93	KLPN.1018.00105.0001	integron_01	CALIN	2	3	GCF_003428845.1
94	KLPN.1018.00105.0001	integron_02	CALIN	2	2	GCF_003428845.1
95	KLPN.1018.00105.0002	integron_01	complete	1	1	GCF_003428845.1
96	KLPN.1018.00105.0003	integron_01	complete	3	4	GCF_003428845.1
97	KLPN.1018.00105.0003	integron_02	CALIN	2	3	GCF_003428845.1
98	KLPN.1018.00106.0001	integron_01	complete	1	4	GCF_002787755.1
99	KLPN.1018.00106.0002	integron_01	In0		1	GCF_002787755.1
100	KLPN.1018.00106.0003	integron_01	complete	3	5	GCF_002787755.1
101	KLPN.1018.00107.0002	integron_01	CALIN	2	4	GCF_000775395.1
102	KLPN.1018.00107.0002	integron_02	complete	1	2	GCF_000775395.1
103	KLPN.1018.00107.0003	integron_01	complete	3	4	GCF_000775395.1
104	KLPN.1018.00108.0004	integron_01	complete	1	1	GCF_001709295.1
105	KLPN.1018.00109.0002	integron_01	complete	3	4	GCF_003288375.1
106	KLPN.1018.00111.0002	integron_01	complete	3	4	GCF_000709185.1
107	KLPN.1018.00112.0004	integron_01	complete	1	1	GCF_002180175.1
108	KLPN.1018.00112.0004	integron_02	CALIN	2	3	GCF_002180175.1
109	KLPN.1018.00113.0002	integron_01	CALIN	2	3	GCF_003030145.1
110	KLPN.1018.00113.0003	integron_01	CALIN	2	3	GCF_003030145.1
111	KLPN.1018.00113.0004	integron_01	complete	1	3	GCF_003030145.1
112	KLPN.1018.00114.0003	integron_01	CALIN	4	9	GCF_001022035.1
113	KLPN.1018.00115.0003	integron_01	complete	3	4	GCF_000417225.2
114	KLPN.1018.00115.0004	integron_01	CALIN	2	4	GCF_000417225.2
115	KLPN.1018.00116.0001	integron_01	complete	3	4	GCF_003037615.2
116	KLPN.1018.00117.0003	integron_01	CALIN	4	5	GCF_003225775.1
117	KLPN.1018.00117.0003	integron_02	complete	1	2	GCF_003225775.1
118	KLPN.1018.00118.0002	integron_01	CALIN	2	3	GCF_001648215.1
119	KLPN.1018.00118.0004	integron_01	complete	5	9	GCF_001648215.1
120	KLPN.1018.00119.0002	integron_01	complete	1	3	GCF_001922465.1
121	KLPN.1018.00119.0004	integron_01	CALIN	2	3	GCF_001922465.1
122	KLPN.1018.00119.0004	integron_02	complete	1	2	GCF_001922465.1
123	KLPN.1018.00120.0001	integron_01	CALIN	2	2	GCF_002055855.1
124	KLPN.1018.00120.0001	integron_02	CALIN	2	3	GCF_002055855.1
125	KLPN.1018.00120.0002	integron_01	complete	3	4	GCF_002055855.1
126	KLPN.1018.00120.0004	integron_01	CALIN	2	4	GCF_002055855.1
127	KLPN.1018.00121.0002	integron_01	complete	2	3	GCF_002192315.1
128	KLPN.1018.00121.0003	integron_01	complete	4	6	GCF_002192315.1
129	KLPN.1018.00122.0002	integron_01	complete	3	6	GCF_003031345.1
130	KLPN.1018.00123.0002	integron_01	complete	1	3	GCF_002211905.1
131	KLPN.1018.00124.0002	integron_01	complete	3	5	GCF_003432405.1
132	KLPN.1018.00124.0003	integron_01	complete	1	3	GCF_003432405.1
133	KLPN.1018.00125.0003	integron_01	complete	3	4	GCF_001902255.1
134	KLPN.1018.00125.0004	integron_01	complete	6	8	GCF_001902255.1
135	KLPN.1018.00128.0001	integron_01	complete	1	3	GCF_002258145.3
136	KLPN.1018.00129.0003	integron_01	complete	6	8	GCF_000807395.2
137	KLPN.1018.00129.0004	integron_01	complete	3	4	GCF_000807395.2
138	KLPN.1018.00130.0001	integron_01	complete	1	3	GCF_002164835.3
139	KLPN.1018.00134.0001	integron_01	complete	1	3	GCF_001705385.1
140	KLPN.1018.00134.0002	integron_01	complete	3	4	GCF_001705385.1
141	KLPN.1018.00135.0004	integron_01	CALIN	2	2	GCF_000785005.1
142	KLPN.1018.00135.0004	integron_02	complete	1	2	GCF_000785005.1
143	KLPN.1018.00137.0002	integron_01	complete	1	1	GCF_003432225.1
144	KLPN.1018.00138.0001	integron_01	complete	1	3	GCF_000281535.2
145	KLPN.1018.00138.0003	integron_01	complete	3	4	GCF_000281535.2
146	KLPN.1018.00139.0001	integron_01	complete	1	3	GCF_003225835.1
147	KLPN.1018.00139.0002	integron_01	complete	3	4	GCF_003225835.1
148	KLPN.1018.00140.0004	integron_01	complete	3	5	GCF_003286995.1
149	KLPN.1018.00141.0001	integron_01	CALIN	2	2	GCF_003069525.1
150	KLPN.1018.00141.0001	integron_02	CALIN	2	3	GCF_003069525.1
151	KLPN.1018.00141.0002	integron_01	complete	1	2	GCF_003069525.1
152	KLPN.1018.00141.0002	integron_02	CALIN	2	3	GCF_003069525.1
153	KLPN.1018.00141.0002	integron_03	complete	3	4	GCF_003069525.1
154	KLPN.1018.00141.0004	integron_01	complete	2	3	GCF_003069525.1
155	KLPN.1018.00141.0004	integron_02	CALIN	2	4	GCF_003069525.1
156	KLPN.1018.00142.0003	integron_01	CALIN	2	4	GCF_000775375.1
157	KLPN.1018.00142.0003	integron_02	complete	1	2	GCF_000775375.1
158	KLPN.1018.00144.0003	integron_01	CALIN	2	2	GCF_000981845.1
159	KLPN.1018.00144.0003	integron_02	CALIN	2	3	GCF_000981845.1
160	KLPN.1018.00145.0001	integron_01	complete	3	4	GCF_003073315.1
161	KLPN.1018.00145.0002	integron_01	complete	1	6	GCF_003073315.1
162	KLPN.1018.00147.0003	integron_01	complete	2	3	GCF_001750805.1
163	KLPN.1018.00148.0003	integron_01	complete	3	4	GCF_000784985.1
164	KLPN.1018.00149.0001	integron_01	CALIN	2	2	GCF_002156785.1
165	KLPN.1018.00149.0001	integron_02	CALIN	2	3	GCF_002156785.1
166	KLPN.1018.00149.0002	integron_01	complete	3	4	GCF_002156785.1
167	KLPN.1018.00149.0002	integron_02	complete	2	5	GCF_002156785.1
168	KLPN.1018.00149.0004	integron_01	complete	3	6	GCF_002156785.1
169	KLPN.1018.00152.0002	integron_01	complete	1	2	GCF_002587885.1
170	KLPN.1018.00152.0002	integron_02	complete	1	3	GCF_002587885.1
171	KLPN.1018.00152.0003	integron_01	CALIN	2	3	GCF_002587885.1
172	KLPN.1018.00153.0001	integron_01	complete	1	3	GCF_001675125.1
173	KLPN.1018.00153.0002	integron_01	complete	3	4	GCF_001675125.1
174	KLPN.1018.00154.0001	integron_01	complete	1	3	GCF_000714675.1
175	KLPN.1018.00154.0002	integron_01	complete	3	4	GCF_000714675.1
176	KLPN.1018.00154.0004	integron_01	complete	6	8	GCF_000714675.1
177	KLPN.1018.00155.0002	integron_01	complete	1	3	GCF_003194325.1
178	KLPN.1018.00155.0002	integron_02	complete	2	3	GCF_003194325.1
179	KLPN.1018.00155.0002	integron_03	complete	4	4	GCF_003194325.1
180	KLPN.1018.00158.0002	integron_01	complete	3	4	GCF_002249975.1
181	KLPN.1018.00159.0001	integron_01	complete	1	3	GCF_002156725.1
182	KLPN.1018.00159.0002	integron_01	complete	3	4	GCF_002156725.1
183	KLPN.1018.00163.0002	integron_01	complete	2	4	GCF_000567225.2
184	KLPN.1018.00165.0001	integron_01	complete	1	3	GCF_002007665.1
185	KLPN.1018.00165.0002	integron_01	complete	3	4	GCF_002007665.1
186	KLPN.1018.00166.0002	integron_01	complete	3	4	GCF_002197225.1
187	KLPN.1018.00166.0003	integron_01	complete	2	4	GCF_002197225.1
188	KLPN.1018.00167.0003	integron_01	complete	3	6	GCF_002944845.1
189	KLPN.1018.00167.0005	integron_01	complete	1	2	GCF_002944845.1
190	KLPN.1018.00168.0004	integron_01	complete	3	4	GCF_900451445.1
191	KLPN.1018.00169.0001	integron_01	complete	1	3	GCF_002056475.1
192	KLPN.1018.00169.0002	integron_01	complete	3	4	GCF_002056475.1
193	KLPN.1018.00169.0003	integron_01	complete	6	8	GCF_002056475.1
194	KLPN.1018.00170.0002	integron_01	CALIN	2	3	GCF_002754835.1
195	KLPN.1018.00170.0002	integron_02	complete	1	2	GCF_002754835.1
196	KLPN.1018.00171.0001	integron_01	complete	1	3	GCF_002852945.2
197	KLPN.1018.00171.0005	integron_01	complete	3	6	GCF_002852945.2
198	KLPN.1018.00172.0002	integron_01	complete	3	4	GCF_000709205.1
199	KLPN.1018.00172.0003	integron_01	CALIN	2	4	GCF_000709205.1
200	KLPN.1018.00172.0004	integron_01	complete	6	8	GCF_000709205.1
201	KLPN.1018.00173.0001	integron_01	complete	2	5	GCF_000807515.1
202	KLPN.1018.00173.0001	integron_02	complete	4	6	GCF_000807515.1
203	KLPN.1018.00173.0002	integron_01	CALIN	2	3	GCF_000807515.1
204	KLPN.1018.00173.0002	integron_02	complete	1	2	GCF_000807515.1
205	KLPN.1018.00174.0002	integron_01	complete	1	4	GCF_001741545.1
206	KLPN.1018.00174.0004	integron_01	complete	2	3	GCF_001741545.1
207	KLPN.1018.00175.0003	integron_01	complete	1	3	GCF_001956965.1
208	KLPN.1018.00176.0005	integron_01	complete	3	4	GCF_001902195.1
209	KLPN.1018.00177.0001	integron_01	complete	1	3	GCF_002848585.1
210	KLPN.1018.00178.0001	integron_01	CALIN	2	2	GCF_002180315.1
211	KLPN.1018.00178.0005	integron_01	CALIN	2	4	GCF_002180315.1
212	KLPN.1018.00178.0005	integron_02	CALIN	2	4	GCF_002180315.1
213	KLPN.1018.00178.0005	integron_03	complete	1	2	GCF_002180315.1
214	KLPN.1018.00179.0002	integron_01	complete	1	2	GCF_001316945.3
215	KLPN.1018.00179.0003	integron_01	complete	2	3	GCF_001316945.3
216	KLPN.1018.00179.0003	integron_02	CALIN	2	3	GCF_001316945.3
217	KLPN.1018.00179.0003	integron_03	CALIN	2	4	GCF_001316945.3
218	KLPN.1018.00180.0003	integron_01	complete	5	10	GCF_002202215.1
219	KLPN.1018.00180.0005	integron_01	CALIN	2	4	GCF_002202215.1
220	KLPN.1018.00181.0001	integron_01	complete	1	3	GCF_002180075.1
221	KLPN.1018.00181.0002	integron_01	complete	3	4	GCF_002180075.1
222	KLPN.1018.00182.0003	integron_01	complete	1	2	GCF_001456095.3
223	KLPN.1018.00183.0002	integron_01	In0		1	GCF_001902535.1
224	KLPN.1018.00183.0003	integron_01	complete	6	8	GCF_001902535.1
225	KLPN.1018.00184.0001	integron_01	complete	1	3	GCF_002587165.1
226	KLPN.1018.00184.0003	integron_01	complete	3	6	GCF_002587165.1
227	KLPN.1018.00185.0001	integron_01	complete	1	3	GCF_002811325.2
228	KLPN.1018.00185.0005	integron_01	complete	3	6	GCF_002811325.2
229	KLPN.1018.00186.0002	integron_01	complete	3	4	GCF_003584585.1
230	KLPN.1018.00186.0003	integron_01	CALIN	2	3	GCF_003584585.1
231	KLPN.1018.00187.0004	integron_01	complete	3	4	GCF_000417085.2
232	KLPN.1018.00189.0002	integron_01	CALIN	2	3	GCF_001902395.1
233	KLPN.1018.00189.0002	integron_02	complete	1	3	GCF_001902395.1
234	KLPN.1018.00191.0002	integron_01	complete	1	1	GCF_003194285.1
235	KLPN.1018.00191.0002	integron_02	CALIN	3	4	GCF_003194285.1
236	KLPN.1018.00192.0003	integron_01	complete	1	2	GCF_001855315.1
237	KLPN.1018.00192.0003	integron_02	complete	1	3	GCF_001855315.1
238	KLPN.1018.00192.0005	integron_01	CALIN	2	2	GCF_001855315.1
239	KLPN.1018.00192.0005	integron_02	complete	1	2	GCF_001855315.1
240	KLPN.1018.00192.0005	integron_03	CALIN	2	1	GCF_001855315.1
241	KLPN.1018.00193.0001	integron_01	complete	1	3	GCF_002056385.1
242	KLPN.1018.00193.0002	integron_01	complete	3	4	GCF_002056385.1
243	KLPN.1018.00193.0003	integron_01	complete	6	8	GCF_002056385.1
244	KLPN.1018.00194.0001	integron_01	CALIN	2	3	GCF_003074015.1
245	KLPN.1018.00194.0002	integron_01	complete	1	2	GCF_003074015.1
246	KLPN.1018.00194.0004	integron_01	complete	1	3	GCF_003074015.1
247	KLPN.1018.00195.0003	integron_01	complete	3	4	GCF_003402495.1
248	KLPN.1018.00195.0004	integron_01	CALIN	2	3	GCF_003402495.1
249	KLPN.1018.00197.0002	integron_01	complete	1	4	GCF_002192375.1
250	KLPN.1018.00197.0005	integron_01	complete	1	2	GCF_002192375.1
251	KLPN.1018.00197.0005	integron_02	CALIN	3	4	GCF_002192375.1
252	KLPN.1018.00198.0003	integron_01	complete	5	7	GCF_001022235.1
253	KLPN.1018.00198.0004	integron_01	CALIN	2	3	GCF_001022235.1
254	KLPN.1018.00200.0005	integron_01	In0		1	GCF_003181055.1
255	KLPN.1018.00200.0005	integron_02	CALIN	2	3	GCF_003181055.1
256	KLPN.1018.00200.0005	integron_03	CALIN	2	2	GCF_003181055.1
257	KLPN.1018.00201.0005	integron_01	complete	1	2	GCF_001456055.3
258	KLPN.1018.00202.0004	integron_01	complete	1	2	GCF_000474885.1
259	KLPN.1018.00203.0001	integron_01	complete	1	3	GCF_000814305.1
260	KLPN.1018.00203.0003	integron_01	complete	3	4	GCF_000814305.1
261	KLPN.1018.00203.0005	integron_01	complete	6	8	GCF_000814305.1
262	KLPN.1018.00204.0005	integron_01	complete	3	4	GCF_001902235.1
263	KLPN.1018.00206.0001	integron_01	complete	1	3	GCF_002164855.2
264	KLPN.1018.00206.0002	integron_01	complete	3	4	GCF_002164855.2
265	KLPN.1018.00207.0004	integron_01	complete	2	4	GCF_002211665.1
266	KLPN.1018.00207.0004	integron_02	CALIN	3	5	GCF_002211665.1
267	KLPN.1018.00208.0003	integron_01	complete	1	3	GCF_002202255.1
268	KLPN.1018.00208.0004	integron_01	CALIN	2	3	GCF_002202255.1
269	KLPN.1018.00208.0004	integron_02	complete	1	1	GCF_002202255.1
270	KLPN.1018.00210.0001	integron_01	complete	1	3	GCF_002848545.1
271	KLPN.1018.00211.0003	integron_01	In0		1	GCF_900451745.1
272	KLPN.1018.00212.0003	integron_01	complete	3	4	GCF_002811335.3
273	KLPN.1018.00212.0004	integron_01	complete	1	2	GCF_002811335.3
274	KLPN.1018.00212.0005	integron_01	complete	3	6	GCF_002811335.3
275	KLPN.1018.00213.0002	integron_01	complete	4	7	GCF_002848565.1
276	KLPN.1018.00213.0005	integron_01	complete	3	3	GCF_002848565.1
277	KLPN.1018.00215.0001	integron_01	complete	4	5	GCF_002202195.1
278	KLPN.1018.00215.0002	integron_01	complete	2	3	GCF_002202195.1
279	KLPN.1018.00215.0004	integron_01	complete	2	4	GCF_002202195.1
280	KLPN.1018.00216.0003	integron_01	complete	1	3	GCF_001908595.1
281	KLPN.1018.00216.0005	integron_01	CALIN	2	2	GCF_001908595.1
282	KLPN.1018.00218.0002	integron_01	complete	3	4	GCF_003571645.1
283	KLPN.1018.00218.0004	integron_01	CALIN	2	4	GCF_003571645.1
284	KLPN.1018.00218.0004	integron_02	complete	1	2	GCF_003571645.1
285	KLPN.1018.00219.0002	integron_01	complete	3	4	GCF_002180155.1
286	KLPN.1018.00219.0005	integron_01	complete	6	8	GCF_002180155.1
287	KLPN.1018.00221.0002	integron_01	complete	1	1	GCF_002753035.1
288	KLPN.1018.00222.0002	integron_01	complete	3	4	GCF_002180295.1
289	KLPN.1018.00223.0003	integron_01	complete	3	4	GCF_001952915.1
290	KLPN.1018.00225.0002	integron_01	CALIN	2	4	GCF_001456135.1
291	KLPN.1018.00225.0002	integron_02	complete	1	3	GCF_001456135.1
292	KLPN.1018.00225.0005	integron_01	CALIN	2	4	GCF_001456135.1
293	KLPN.1018.00226.0002	integron_01	complete	4	4	GCF_003571525.1
294	KLPN.1018.00226.0002	integron_02	complete	3	4	GCF_003571525.1
295	KLPN.1018.00226.0004	integron_01	complete	1	3	GCF_003571525.1
296	KLPN.1018.00227.0001	integron_01	complete	1	4	GCF_001644765.1
297	KLPN.1018.00227.0003	integron_01	In0		1	GCF_001644765.1
298	KLPN.1018.00227.0004	integron_01	complete	3	5	GCF_001644765.1
299	KLPN.1018.00230.0002	integron_01	CALIN	2	3	GCF_002591075.1
300	KLPN.1018.00230.0004	integron_01	CALIN	2	3	GCF_002591075.1
301	KLPN.1018.00231.0001	integron_01	complete	1	3	GCF_002753605.1
302	KLPN.1018.00231.0002	integron_01	CALIN	3	3	GCF_002753605.1
303	KLPN.1018.00231.0004	integron_01	CALIN	2	3	GCF_002753605.1
304	KLPN.1018.00231.0004	integron_02	In0		1	GCF_002753605.1
305	KLPN.1018.00232.0001	integron_01	complete	4	6	GCF_002853435.2
306	KLPN.1018.00232.0002	integron_01	complete	3	4	GCF_002853435.2
307	KLPN.1018.00233.0001	integron_01	complete	1	3	GCF_000474865.1
308	KLPN.1018.00233.0003	integron_01	complete	6	8	GCF_000474865.1
309	KLPN.1018.00233.0004	integron_01	complete	3	4	GCF_000474865.1
310	KLPN.1018.00234.0005	integron_01	CALIN	2	3	GCF_003571745.1
311	KLPN.1018.00234.0006	integron_01	complete	6	10	GCF_003571745.1
312	KLPN.1018.00235.0002	integron_01	CALIN	2	3	GCF_001913175.1
313	KLPN.1018.00235.0002	integron_02	CALIN	2	4	GCF_001913175.1
314	KLPN.1018.00235.0002	integron_03	complete	1	1	GCF_001913175.1
315	KLPN.1018.00236.0001	integron_01	CALIN	2	3	GCF_002156745.1
316	KLPN.1018.00236.0001	integron_02	complete	4	5	GCF_002156745.1
317	KLPN.1018.00236.0002	integron_01	complete	1	4	GCF_002156745.1
318	KLPN.1018.00237.0003	integron_01	complete	1	2	GCF_002202235.1
319	KLPN.1018.00237.0004	integron_01	complete	5	10	GCF_002202235.1
320	KLPN.1018.00237.0005	integron_01	CALIN	2	3	GCF_002202235.1
321	KLPN.1018.00238.0003	integron_01	CALIN	2	4	GCF_000598005.1
322	KLPN.1018.00238.0003	integron_02	complete	1	1	GCF_000598005.1
323	KLPN.1018.00238.0006	integron_01	CALIN	2	4	GCF_000598005.1
324	KLPN.1018.00239.0005	integron_01	complete	3	4	GCF_002258055.2
325	KLPN.1018.00240.0002	integron_01	complete	2	4	GCF_002055765.1
326	KLPN.1018.00240.0004	integron_01	CALIN	2	3	GCF_002055765.1
327	KLPN.1018.00240.0006	integron_01	complete	1	3	GCF_002055765.1
328	KLPN.1018.00241.0001	integron_01	complete	1	2	GCF_003413505.1
329	KLPN.1018.00242.0002	integron_01	complete	3	4	GCF_002197505.1
330	KLPN.1018.00242.0004	integron_01	complete	6	8	GCF_002197505.1
331	KLPN.1018.00242.0006	integron_01	CALIN	2	4	GCF_002197505.1
332	KLPN.1018.00243.0001	integron_01	complete	1	3	GCF_002852975.2
333	KLPN.1018.00243.0005	integron_01	complete	1	2	GCF_002852975.2
334	KLPN.1018.00244.0004	integron_01	complete	3	4	GCF_002635725.1
335	KLPN.1018.00244.0005	integron_01	CALIN	2	3	GCF_002635725.1
336	KLPN.1018.00246.0001	integron_01	complete	3	4	GCF_000474905.1
337	KLPN.1018.00246.0005	integron_01	complete	6	8	GCF_000474905.1
338	KLPN.1018.00247.0002	integron_01	complete	1	3	GCF_003031325.1
339	KLPN.1018.00247.0003	integron_01	complete	3	6	GCF_003031325.1
340	KLPN.1018.00248.0005	integron_01	CALIN	2	4	GCF_001022175.1
341	KLPN.1018.00248.0006	integron_01	complete	1	3	GCF_001022175.1
342	KLPN.1018.00248.0006	integron_02	CALIN	2	4	GCF_001022175.1
343	KLPN.1018.00249.0005	integron_01	complete	4	6	GCF_003038215.2
344	KLPN.1018.00249.0006	integron_01	CALIN	2	2	GCF_003038215.2
345	KLPN.1018.00250.0003	integron_01	CALIN	2	4	GCF_000016305.1
346	KLPN.1018.00250.0004	integron_01	complete	4	5	GCF_000016305.1
347	KLPN.1018.00251.0002	integron_01	complete	3	4	GCF_002812665.1
348	KLPN.1018.00251.0003	integron_01	CALIN	2	4	GCF_002812665.1
349	KLPN.1018.00251.0003	integron_02	complete	1	2	GCF_002812665.1
350	KLPN.1018.00252.0002	integron_01	CALIN	2	3	GCF_002752815.1
351	KLPN.1018.00252.0002	integron_02	complete	1	2	GCF_002752815.1
352	KLPN.1018.00253.0002	integron_01	CALIN	3	3	GCF_002636375.1
353	KLPN.1018.00253.0002	integron_02	complete	4	4	GCF_002636375.1
354	KLPN.1018.00253.0002	integron_03	CALIN	3	3	GCF_002636375.1
355	KLPN.1018.00254.0004	integron_01	complete	3	4	GCF_002636095.1
356	KLPN.1018.00254.0005	integron_01	CALIN	2	3	GCF_002636095.1
357	KLPN.1018.00255.0002	integron_01	complete	1	2	GCF_003402995.1
358	KLPN.1018.00255.0003	integron_01	complete	1	3	GCF_003402995.1
359	KLPN.1018.00256.0007	integron_01	complete	3	4	GCF_001908515.1
360	KLPN.1018.00257.0001	integron_01	complete	5	8	GCF_001952895.1
361	KLPN.1018.00257.0002	integron_01	complete	3	4	GCF_001952895.1
362	KLPN.1018.00257.0003	integron_01	CALIN	2	4	GCF_001952895.1
363	KLPN.1018.00257.0003	integron_02	complete	1	2	GCF_001952895.1
364	KLPN.1018.00257.0004	integron_01	CALIN	2	3	GCF_001952895.1
365	KLPN.1018.00258.0004	integron_01	complete	3	3	GCF_000240185.1
366	KLPN.1018.00259.0001	integron_01	complete	1	3	GCF_002753165.1
367	KLPN.1018.00259.0002	integron_01	CALIN	3	3	GCF_002753165.1
368	KLPN.1018.00259.0004	integron_01	CALIN	2	3	GCF_002753165.1
369	KLPN.1018.00259.0004	integron_02	In0		1	GCF_002753165.1
370	KLPN.1018.00260.0004	integron_01	CALIN	3	3	GCF_003429545.1
371	KLPN.1018.00260.0004	integron_02a	complete	3	6	GCF_003429545.1
372	KLPN.1018.00260.0004	integron_02b	complete	4	6	GCF_003429545.1
373	KLPN.1018.00261.0004	integron_01	complete	1	4	GCF_001741665.1
374	KLPN.1018.00261.0006	integron_01	complete	2	3	GCF_001741665.1
375	KLPN.1018.00261.0007	integron_01	complete	2	4	GCF_001741665.1
376	KLPN.1018.00263.0007	integron_01	complete	1	3	GCF_000512165.1
377	KLPN.1018.00263.0007	integron_02	CALIN	2	4	GCF_000512165.1
378	KLPN.1018.00264.0001	integron_01	complete	1	4	GCF_001455995.1
379	KLPN.1018.00264.0004	integron_01	In0		1	GCF_001455995.1
380	KLPN.1018.00264.0007	integron_01	complete	3	5	GCF_001455995.1
381	KLPN.1018.00265.0002	integron_01	CALIN	2	3	GCF_003073235.1
382	KLPN.1018.00265.0004	integron_01	complete	3	4	GCF_003073235.1
383	KLPN.1018.00266.0003	integron_01	CALIN	3	3	GCF_002636215.1
384	KLPN.1018.00266.0004	integron_01	complete	2	4	GCF_002636215.1
385	KLPN.1018.00266.0005	integron_01	complete	2	3	GCF_002636215.1
386	KLPN.1018.00266.0006	integron_01	CALIN	2	3	GCF_002636215.1
387	KLPN.1018.00266.0006	integron_02	complete	3	6	GCF_002636215.1
388	KLPN.1018.00269.0001	integron_01	complete	3	4	GCF_001471835.2
389	KLPN.1018.00269.0001	integron_02	complete	3	4	GCF_001471835.2
390	KLPN.1018.00270.0001	integron_01	complete	1	3	GCF_002636515.1
391	KLPN.1018.00271.0001	integron_01	complete	1	4	GCF_003006175.1
392	KLPN.1018.00271.0002	integron_01	CALIN	2	2	GCF_003006175.1
393	KLPN.1018.00273.0003	integron_01	complete	4	9	GCF_003432165.1
394	KLPN.1018.00274.0002	integron_01	complete	3	4	GCF_002968495.1
395	KLPN.1018.00274.0004	integron_01	complete	6	8	GCF_002968495.1
396	KLPN.1018.00276.0002	integron_01	complete	1	2	GCF_001902415.1
397	KLPN.1018.00276.0002	integron_02	CALIN	2	3	GCF_001902415.1
398	KLPN.1018.00276.0004	integron_01	complete	3	4	GCF_001902415.1
399	KLPN.1018.00277.0002	integron_01	complete	1	2	GCF_003056445.1
400	KLPN.1018.00277.0005	integron_01	CALIN	2	2	GCF_003056445.1
401	KLPN.1018.00278.0004	integron_01	complete	6	15	GCF_000764635.1
402	KLPN.1018.00279.0011	integron_01	complete	6	8	GCF_000599905.1
403	KLPN.1018.00280.0001	integron_01	complete	6	9	GCF_001008725.1
404	KLPN.1018.00280.0007	integron_01	CALIN	2	4	GCF_001008725.1
405	KLPN.1018.00280.0011	integron_01	complete	2	3	GCF_001008725.1
406	KLPN.1018.00281.0006	integron_01	CALIN	2	2	GCF_003037165.1
407	KLPN.1018.00283.0002	integron_01	complete	1	2	GCF_002148835.1
408	KLPN.1018.00284.0005	integron_01	CALIN	2	3	GCF_000764615.1
409	KLPN.1018.00284.0005	integron_02	complete	3	4	GCF_000764615.1
410	KLPN.1018.00285.0003	integron_01	complete	1	2	GCF_002180255.1
411	KLPN.1018.00285.0004	integron_01	CALIN	2	3	GCF_002180255.1
412	KLPN.1018.00285.0004	integron_02	complete	2	4	GCF_002180255.1
413	KLPN.1018.00286.0002	integron_01	complete	1	3	GCF_000695935.1
414	KLPN.1018.00286.0002	integron_02	complete	1	3	GCF_000695935.1
415	KLPN.1018.00286.0002	integron_03	In0		1	GCF_000695935.1
416	KLPN.1018.00286.0002	integron_04	complete	2	4	GCF_000695935.1
417	KLPN.1018.00287.0003	integron_01	complete	1	2	GCF_001875025.1
418	KLPN.1018.00287.0003	integron_02	CALIN	2	4	GCF_001875025.1
419	KLPN.1018.00288.0004	integron_01	complete	4	7	GCF_003443755.1
420	KLPN.1018.00288.0005	integron_01	complete	1	2	GCF_003443755.1
421	KLPN.1018.00289.0001	integron_01	complete	1	3	GCF_003112125.1
422	KLPN.1018.00289.0004	integron_01	complete	1	2	GCF_003112125.1
423	KLPN.1018.00290.0002	integron_01	complete	3	4	GCF_003010735.1
424	KLPN.1018.00290.0005	integron_01	complete	1	2	GCF_003010735.1
425	KLPN.1018.00290.0005	integron_02	CALIN	2	4	GCF_003010735.1
426	KLPN.1018.00294.0002	integron_01	complete	2	4	GCF_003571605.1
427	KLPN.1018.00294.0004	integron_01	complete	1	4	GCF_003571605.1
428	KLPN.1018.00294.0005	integron_01	complete	2	3	GCF_003571605.1
429	KLPN.1018.00295.0007	integron_01	CALIN	4	10	GCF_001902335.1
430	KLPN.1018.00296.0001	integron_01	complete	1	3	GCF_003571705.1
431	KLPN.1018.00296.0007	integron_01	complete	1	2	GCF_003571705.1
432	KLPN.1018.00296.0007	integron_02	CALIN	2	3	GCF_003571705.1
433	KLPN.1018.00298.0001	integron_01	complete	1	3	GCF_001875055.2
434	KLPN.1018.00298.0004	integron_01	complete	3	4	GCF_001875055.2
435	KLPN.1018.00299.0004	integron_01	CALIN	2	4	GCF_000694475.2
436	KLPN.1018.00299.0005	integron_01	complete	3	4	GCF_000694475.2
437	KLPN.1018.00300.0001	integron_01	complete	1	3	GCF_000567765.2
438	KLPN.1018.00300.0006	integron_01	complete	6	8	GCF_000567765.2
439	KLPN.1018.00301.0004	integron_01	complete	2	4	GCF_001874695.1
440	KLPN.1018.00301.0004	integron_02	CALIN	2	3	GCF_001874695.1
441	KLPN.1018.00301.0004	integron_03	complete	4	6	GCF_001874695.1
442	KLPN.1018.00301.0004	integron_04	complete	1	2	GCF_001874695.1
443	KLPN.1018.00303.0004	integron_01	complete	1	2	GCF_002753015.1
444	KLPN.1018.00304.0001	integron_01	complete	1	3	GCF_002968475.1
445	KLPN.1018.00304.0002	integron_01	complete	3	7	GCF_002968475.1
446	KLPN.1018.00304.0005	integron_01	complete	6	8	GCF_002968475.1
447	KLPN.1018.00305.0005	integron_01	complete	4	4	GCF_001875075.1
448	KLPN.1018.00305.0008	integron_01	complete	4	5	GCF_001875075.1
449	KLPN.1018.00306.0002	integron_01	complete	3	4	GCF_001874725.1
450	KLPN.1018.00306.0006	integron_01	complete	6	8	GCF_001874725.1
451	KLPN.1018.00307.0001	integron_01	complete	3	4	GCF_001874875.1
452	KLPN.1018.00307.0003	integron_01	complete	1	3	GCF_001874875.1
453	KLPN.1018.00307.0003	integron_02	complete	1	2	GCF_001874875.1
454	KLPN.1018.00307.0009	integron_01	complete	2	4	GCF_001874875.1
455	KLPN.1018.00308.0014	integron_01	complete	3	4	GCF_900069965.1
456	KLPN.1018.00310.0023	integron_01	CALIN	2	3	GCF_003226215.1
457	KLPN.1018.00310.0023	integron_02	complete	1	2	GCF_003226215.1
458	KLPN.1018.00311.0007	integron_01	complete	3	4	GCF_001875045.2
459	KLPN.1018.00311.0009	integron_01	CALIN	2	3	GCF_001875045.2
460	KLPN.1018.00312.0004	integron_01	CALIN	2	3	GCF_001875135.1
461	KLPN.1018.00312.0005	integron_01	complete	1	2	GCF_001875135.1
462	KLPN.1018.00312.0005	integron_02	CALIN	2	4	GCF_001875135.1
463	KLPN.1018.00313.0009	integron_01	complete	1	2	GCF_003225795.1
464	KLPN.1018.00313.0009	integron_02	CALIN	2	3	GCF_003225795.1
465	KLPN.1018.00315.0007	integron_01	CALIN	3	3	GCF_000694835.1
466	KLPN.1018.00316.0001	integron_01	complete	6	8	GCF_000807475.1
467	KLPN.1018.00316.0006	integron_01	complete	1	1	GCF_000807475.1
468	KLPN.1018.00316.0006	integron_02	CALIN	2	3	GCF_000807475.1
469	KLPN.1018.00316.0010	integron_01	complete	1	3	GCF_000807475.1
470	KLPN.1018.00317.0010	integron_01	complete	1	4	GCF_003334895.1
471	KLPN.1018.00317.0014	integron_01	complete	1	3	GCF_003334895.1
472	KLPN.1018.00317.0014	integron_02	CALIN	2	3	GCF_003334895.1
473	KLPN.1018.00317.0014	integron_03	complete	1	3	GCF_003334895.1
474	KLPN.1018.00318.0010	integron_01	CALIN	2	2	GCF_000566985.1
475	KLPN.1018.00318.0011	integron_01	CALIN	2	2	GCF_000566985.1
476	KLPN.1018.00319.0007	integron_01	complete	3	6	GCF_000567505.1
477	KLPN.1018.00320.0011	integron_01	complete	1	2	GCF_003335065.1
478	KLPN.1018.00320.0011	integron_02	CALIN	2	3	GCF_003335065.1
479	KLPN.1018.00320.0022	integron_01	complete	1	4	GCF_003335065.1
480	KLPN.1018.00321.0003	integron_01	complete	1	3	GCF_003410395.1
481	KLPN.1018.00321.0025	integron_01	complete	3	6	GCF_003410395.1
482	KLPN.1018.00322.0006	integron_01	In0		1	GCF_000567525.1
483	KLPN.1018.00329.0012	integron_01	In0		1	GCF_000694915.1
484	KLPN.1018.00330.0006	integron_01	CALIN	2	3	GCF_001907955.1
485	KLPN.1018.00330.0018	integron_01	complete	1	1	GCF_001907955.1
486	KLPN.1018.00331.0011	integron_01	complete	3	4	GCF_000693055.1
487	KLPN.1018.00331.0017	integron_01	complete	2	4	GCF_000693055.1
488	KLPN.1018.00331.0020	integron_01	CALIN	3	3	GCF_000693055.1
489	KLPN.1018.00332.0017	integron_01	complete	2	2	GCF_000694895.1
490	KLPN.1018.00333.0004	integron_01	CALIN	2	2	GCF_002738115.1
491	KLPN.1018.00333.0004	integron_02	complete	1	3	GCF_002738115.1
492	KLPN.1018.00334.0004	integron_01	complete	1	3	GCF_001031705.1
493	KLPN.1018.00334.0012	integron_01	complete	1	2	GCF_001031705.1
494	KLPN.1018.00334.0012	integron_02	CALIN	2	3	GCF_001031705.1
495	KLPN.1018.00336.0001	integron_01	complete	1	3	GCF_001031065.1
496	KLPN.1018.00337.0009	integron_01	complete	3	4	GCF_000694395.1
497	KLPN.1018.00337.0014	integron_01	CALIN	2	4	GCF_000694395.1
498	KLPN.1018.00338.0014	integron_01	complete	1	3	GCF_001034135.1
499	KLPN.1018.00339.0012	integron_01	complete	1	2	GCF_000693255.1
500	KLPN.1018.00340.0014	integron_01	complete	3	4	GCF_000567325.1
501	KLPN.1018.00341.0001	integron_01	complete	5	5	GCF_001875125.1
502	KLPN.1018.00341.0007	integron_01	complete	2	4	GCF_001875125.1
503	KLPN.1018.00342.0020	integron_01	complete	3	4	GCF_900093205.1
504	KLPN.1018.00342.0023	integron_01	CALIN	2	2	GCF_900093205.1
505	KLPN.1018.00344.0021	integron_01	complete	1	3	GCF_000694095.1
506	KLPN.1018.00345.0014	integron_01	CALIN	2	2	GCF_900093265.1
507	KLPN.1018.00345.0029	integron_01	complete	1	1	GCF_900093265.1
508	KLPN.1018.00346.0023	integron_01	CALIN	2	2	GCF_900493485.1
509	KLPN.1018.00348.0009	integron_01	CALIN	2	1	GCF_000958955.1
510	KLPN.1018.00348.0020	integron_01	complete	3	3	GCF_000958955.1
511	KLPN.1018.00348.0022	integron_01	CALIN	2	3	GCF_000958955.1
512	KLPN.1018.00349.0007	integron_01	complete	3	4	GCF_000958975.1
513	KLPN.1018.00349.0011	integron_01	CALIN	2		GCF_000958975.1
514	KLPN.1018.00349.0021	integron_01	CALIN	2	3	GCF_000958975.1
515	KLPN.1018.00355.0010	integron_01	complete	3	4	GCF_000567305.1
516	KLPN.1018.00355.0013	integron_01	CALIN	4	5	GCF_000567305.1
517	KLPN.1018.00359.0016	integron_01	CALIN	3	5	GCF_001031325.1
518	KLPN.1018.00360.0011	integron_01	complete	3	4	GCF_000566925.1
519	KLPN.1018.00360.0016	integron_01	complete	3	5	GCF_000566925.1
520	KLPN.1018.00361.0009	integron_01	complete	1	3	GCF_001032855.1
521	KLPN.1018.00361.0016	integron_01	complete	1	3	GCF_001032855.1
522	KLPN.1018.00362.0017	integron_01	complete	1	2	GCF_000441835.1
523	KLPN.1018.00362.0020	integron_01	complete	3	5	GCF_000441835.1
524	KLPN.1018.00363.0014	integron_01	complete	3	4	GCF_000692975.1
525	KLPN.1018.00365.0011	integron_01	complete	3	4	GCF_000694755.1
526	KLPN.1018.00365.0030	integron_01	CALIN	3	2	GCF_000694755.1
527	KLPN.1018.00366.0030	integron_01	CALIN	2	3	GCF_000694795.1
528	KLPN.1018.00368.0014	integron_01	CALIN	2	2	GCF_000693455.1
529	KLPN.1018.00368.0031	integron_01	CALIN	2	2	GCF_000693455.1
530	KLPN.1018.00369.0019	integron_01	complete	1	1	GCF_900092865.1
531	KLPN.1018.00372.0004	integron_01	complete	1	1	GCF_000567685.1
532	KLPN.1018.00372.0004	integron_02	CALIN	2	3	GCF_000567685.1
533	KLPN.1018.00374.0008	integron_01	complete	1	3	GCF_001031155.1
534	KLPN.1018.00374.0015	integron_01	CALIN	2	4	GCF_001031155.1
535	KLPN.1018.00374.0015	integron_02	complete	1	2	GCF_001031155.1
536	KLPN.1018.00375.0006	integron_01	complete	1	3	GCF_001034245.1
537	KLPN.1018.00375.0013	integron_01	CALIN	2	4	GCF_001034245.1
538	KLPN.1018.00376.0014	integron_01	complete	1	7	GCF_001185685.1
539	KLPN.1018.00378.0005	integron_01	complete	1	3	GCF_001031385.1
540	KLPN.1018.00378.0012	integron_01	complete	1	2	GCF_001031385.1
541	KLPN.1018.00378.0017	integron_01	CALIN	2	4	GCF_001031385.1
542	KLPN.1018.00379.0011	integron_01	complete	4	8	GCF_001033245.1
543	KLPN.1018.00379.0022	integron_01	CALIN	3	4	GCF_001033245.1
544	KLPN.1018.00381.0018	integron_01	complete	1	2	GCF_000694215.1
545	KLPN.1018.00382.0015	integron_01	complete	3	4	GCF_000693915.1
546	KLPN.1018.00382.0022	integron_01	complete	6	8	GCF_000693915.1
547	KLPN.1018.00384.0024	integron_01	complete	3	4	GCF_000566865.1
548	KLPN.1018.00385.0012	integron_01	complete	4	7	GCF_000692935.1
549	KLPN.1018.00386.0027	integron_01	complete	1	1	GCF_900171855.1
550	KLPN.1018.00387.0015	integron_01	complete	1	3	GCF_000706585.1
551	KLPN.1018.00388.0017	integron_01	complete	1	3	GCF_000693955.1
552	KLPN.1018.00388.0022	integron_01	CALIN	2	2	GCF_000693955.1
553	KLPN.1018.00388.0027	integron_01	CALIN	2	2	GCF_000693955.1
554	KLPN.1018.00389.0012	integron_01	complete	1	2	GCF_900093285.1
555	KLPN.1018.00390.0014	integron_01	complete	1	1	GCF_900172435.1
556	KLPN.1018.00395.0014	integron_01	CALIN	2	1	GCF_900172595.1
557	KLPN.1018.00396.0038	integron_01	In0		1	GCF_900093065.1
558	KLPN.1018.00396.0046	integron_01	CALIN	2	1	GCF_900093065.1
559	KLPN.1018.00396.0076	integron_01	CALIN	5	3	GCF_900093065.1
560	KLPN.1018.00396.0081	integron_01	CALIN	3	2	GCF_900093065.1
561	KLPN.1018.00401.0015	integron_01	complete	6	8	GCF_001031865.1
562	KLPN.1018.00404.0016	integron_01	complete	1	2	GCF_000693875.1
563	KLPN.1018.00406.0017	integron_01	CALIN	4	9	GCF_001186065.1
564	KLPN.1018.00408.0020	integron_01	complete	6	8	GCF_000567465.1
565	KLPN.1018.00410.0018	integron_01	complete	1	3	GCF_000694255.1
566	KLPN.1018.00410.0022	integron_01	CALIN	2	3	GCF_000694255.1
567	KLPN.1018.00411.0015	integron_01	complete	3	4	GCF_000693595.1
568	KLPN.1018.00415.0019	integron_01	CALIN	2	3	GCF_000693335.1
569	KLPN.1018.00416.0005	integron_01	CALIN	2	2	GCF_001033915.1
570	KLPN.1018.00417.0032	integron_01	complete	1	2	GCF_900172055.1
571	KLPN.1018.00418.0024	integron_01	CALIN	2	1	GCF_900092875.1
572	KLPN.1018.00419.0035	integron_01	complete	1	1	GCF_900493415.1
573	KLPN.1018.00420.0010	integron_01	CALIN	2	2	GCF_900092725.1
574	KLPN.1018.00420.0041	integron_01	complete	1	1	GCF_900092725.1
575	KLPN.1018.00423.0013	integron_01	CALIN	2	2	GCF_900510025.1
576	KLPN.1018.00423.0045	integron_01	complete	1	2	GCF_900510025.1
577	KLPN.1018.00424.0020	integron_01	CALIN	2	3	GCF_900092805.1
578	KLPN.1018.00424.0042	integron_01	complete	1	1	GCF_900092805.1
579	KLPN.1018.00425.0047	integron_01	complete	1	1	GCF_900092825.1
580	KLPN.1018.00427.0014	integron_01	complete	3	4	GCF_000693135.1
581	KLPN.1018.00428.0035	integron_01	complete	3	4	GCF_900494205.1
582	KLPN.1018.00432.0015	integron_01	CALIN	2	3	GCF_001033525.1
583	KLPN.1018.00432.0015	integron_02	complete	1	1	GCF_001033525.1
584	KLPN.1018.00433.0012	integron_01	complete	5	6	GCF_000807495.1
585	KLPN.1018.00433.0018	integron_01	complete	1	3	GCF_000807495.1
586	KLPN.1018.00434.0016	integron_01	CALIN	2	3	GCF_001032665.1
587	KLPN.1018.00434.0016	integron_02	complete	1	2	GCF_001032665.1
588	KLPN.1018.00436.0018	integron_01	CALIN	3	4	GCF_001034085.1
589	KLPN.1018.00438.0014	integron_01	complete	3	4	GCF_000567585.1
590	KLPN.1018.00438.0022	integron_01	complete	6	8	GCF_000567585.1
591	KLPN.1018.00439.0018	integron_01	complete	1	3	GCF_000566805.1
592	KLPN.1018.00440.0003	integron_01	complete	1	3	GCF_001030935.1
593	KLPN.1018.00440.0018	integron_01	complete	1	3	GCF_001030935.1
594	KLPN.1018.00440.0018	integron_02	CALIN	2	4	GCF_001030935.1
595	KLPN.1018.00443.0016	integron_01	complete	3	4	GCF_001031235.1
596	KLPN.1018.00443.0017	integron_01	CALIN	2	4	GCF_001031235.1
597	KLPN.1018.00444.0017	integron_01	CALIN	2	3	GCF_000693975.1
598	KLPN.1018.00444.0019	integron_01	complete	1	2	GCF_000693975.1
599	KLPN.1018.00445.0015	integron_01	complete	3	4	GCF_001034325.1
600	KLPN.1018.00445.0020	integron_01	CALIN	2	2	GCF_001034325.1
601	KLPN.1018.00445.0022	integron_01	In0		1	GCF_001034325.1
602	KLPN.1018.00445.0023	integron_01	In0		1	GCF_001034325.1
603	KLPN.1018.00446.0005	integron_01	complete	1	2	GCF_003334965.1
604	KLPN.1018.00446.0005	integron_02	CALIN	2	3	GCF_003334965.1
605	KLPN.1018.00446.0027	integron_01	complete	1	4	GCF_003334965.1
606	KLPN.1018.00447.0023	integron_01	complete	1	2	GCF_001185925.1
607	KLPN.1018.00447.0026	integron_01	CALIN	2	3	GCF_001185925.1
608	KLPN.1018.00447.0027	integron_01	complete	2	2	GCF_001185925.1
609	KLPN.1018.00449.0014	integron_01	complete	3	4	GCF_000567365.1
610	KLPN.1018.00449.0022	integron_01	complete	1	2	GCF_000567365.1
611	KLPN.1018.00450.0021	integron_01	complete	6	8	GCF_001033565.1
612	KLPN.1018.00452.0015	integron_01	CALIN	3	2	GCF_000693635.1
613	KLPN.1018.00452.0016	integron_01	In0		1	GCF_000693635.1
614	KLPN.1018.00454.0032	integron_01	complete	3	3	GCF_000694855.1
615	KLPN.1018.00456.0035	integron_01	complete	1	1	GCF_900511715.1
616	KLPN.1018.00456.0038	integron_01	CALIN	2	2	GCF_900511715.1
617	KLPN.1018.00458.0027	integron_01	complete	2	1	GCF_900515175.1
618	KLPN.1018.00459.0043	integron_01	complete	1	1	GCF_900493195.1
619	KLPN.1018.00460.0037	integron_01	complete	2	1	GCF_900512565.1
620	KLPN.1018.00463.0017	integron_01	complete	1	1	GCF_900508615.1
621	KLPN.1018.00464.0012	integron_01	complete	1	3	GCF_900093165.1
622	KLPN.1018.00464.0062	integron_01	CALIN	2	3	GCF_900093165.1
623	KLPN.1018.00465.0010	integron_01	complete	3	4	GCF_001938035.1
624	KLPN.1018.00465.0019	integron_01	CALIN	2	3	GCF_001938035.1
625	KLPN.1018.00469.0015	integron_01	complete	1	3	GCF_001033335.1
626	KLPN.1018.00469.0017	integron_01	CALIN	2	4	GCF_001033335.1
627	KLPN.1018.00469.0017	integron_02	complete	1	2	GCF_001033335.1
628	KLPN.1018.00471.0016	integron_01	CALIN	2	4	GCF_001032615.1
629	KLPN.1018.00471.0017	integron_01	complete	1	2	GCF_001032615.1
630	KLPN.1018.00476.0017	integron_01	complete	2	3	GCF_001033745.1
631	KLPN.1018.00478.0008	integron_01	CALIN	2	2	GCF_900093375.1
632	KLPN.1018.00478.0015	integron_01	complete	3	4	GCF_900093375.1
633	KLPN.1018.00479.0016	integron_01	CALIN	2	3	GCF_000567625.1
634	KLPN.1018.00479.0016	integron_02	complete	1	2	GCF_000567625.1
635	KLPN.1018.00479.0020	integron_01	CALIN	4	11	GCF_000567625.1
636	KLPN.1018.00480.0013	integron_01	complete	1	3	GCF_001031675.1
637	KLPN.1018.00480.0015	integron_01	complete	3	4	GCF_001031675.1
638	KLPN.1018.00480.0019	integron_01	CALIN	2	4	GCF_001031675.1
639	KLPN.1018.00481.0006	integron_01	complete	1	2	GCF_001185895.1
640	KLPN.1018.00481.0022	integron_01	complete	1	2	GCF_001185895.1
641	KLPN.1018.00481.0024	integron_01	CALIN	2	4	GCF_001185895.1
642	KLPN.1018.00482.0001	integron_01	complete	1	3	GCF_001032585.1
643	KLPN.1018.00482.0019	integron_01	complete	1	2	GCF_001032585.1
644	KLPN.1018.00482.0021	integron_01	CALIN	2	4	GCF_001032585.1
645	KLPN.1018.00483.0014	integron_01	In0		1	GCF_000567045.1
646	KLPN.1018.00483.0015	integron_01	complete	2	3	GCF_000567045.1
647	KLPN.1018.00484.0019	integron_01	complete	1	3	GCF_001033835.1
648	KLPN.1018.00484.0022	integron_01a	complete	3	5	GCF_001033835.1
649	KLPN.1018.00484.0022	integron_01b	complete	2	3	GCF_001033835.1
650	KLPN.1018.00485.0008	integron_01	complete	1	3	GCF_001031405.1
651	KLPN.1018.00486.0021	integron_01	complete	1	2	GCF_000693555.1
652	KLPN.1018.00486.0022	integron_01	CALIN	2	4	GCF_000693555.1
653	KLPN.1018.00488.0002	integron_01	CALIN	2	2	GCF_000300735.3
654	KLPN.1018.00488.0003	integron_01	complete	1	2	GCF_000300735.3
655	KLPN.1018.00491.0017	integron_01	complete	3	4	GCF_000706605.1
656	KLPN.1018.00491.0029	integron_01	complete	6	8	GCF_000706605.1
657	KLPN.1018.00495.0005	integron_01	CALIN	2	2	GCF_900092885.1
658	KLPN.1018.00495.0015	integron_01	complete	1	1	GCF_900092885.1
659	KLPN.1018.00496.0006	integron_01	CALIN	2	3	GCF_001032145.1
660	KLPN.1018.00498.0017	integron_01	complete	3	4	GCF_000694435.1
661	KLPN.1018.00500.0011	integron_01	complete	1	3	GCF_900173325.1
662	KLPN.1018.00503.0019	integron_01	complete	1	3	GCF_900510435.1
663	KLPN.1018.00504.0022	integron_01	complete	2	4	GCF_900493165.1
664	KLPN.1018.00506.0004	integron_01	CALIN	4	2	GCF_900093155.1
665	KLPN.1018.00506.0007	integron_01	complete	1	2	GCF_900093155.1
666	KLPN.1018.00507.0015	integron_01	complete	1	1	GCF_900506665.1
667	KLPN.1018.00508.0042	integron_01	complete	1	3	GCF_900512725.1
668	KLPN.1018.00509.0009	integron_01	CALIN	2	3	GCF_900508215.1
669	KLPN.1018.00509.0040	integron_01	complete	1	1	GCF_900508215.1
670	KLPN.1018.00510.0007	integron_01	CALIN	2	2	GCF_900173115.1
671	KLPN.1018.00510.0046	integron_01	complete	1	2	GCF_900173115.1
672	KLPN.1018.00511.0001	integron_01	complete	3	4	GCF_900493275.1
673	KLPN.1018.00511.0011	integron_01	CALIN	3	4	GCF_900493275.1
674	KLPN.1018.00512.0019	integron_01	complete	1	1	GCF_900172675.1
675	KLPN.1018.00512.0041	integron_01	CALIN	2	3	GCF_900172675.1
676	KLPN.1018.00513.0049	integron_01	CALIN	3	5	GCF_900493745.1
677	KLPN.1018.00514.0005	integron_01	complete	1	1	GCF_900511435.1
678	KLPN.1018.00514.0037	integron_01	CALIN	2	2	GCF_900511435.1
679	KLPN.1018.00517.0053	integron_01	In0		1	GCF_900513515.1
680	KLPN.1018.00519.0025	integron_01	CALIN	2	2	GCF_900509115.1
681	KLPN.1018.00519.0051	integron_01	complete	1	1	GCF_900509115.1
682	KLPN.1018.00521.0047	integron_01	complete	1	1	GCF_900171935.1
683	KLPN.1018.00522.0051	integron_01	CALIN	2	2	GCF_900092675.1
684	KLPN.1018.00525.0006	integron_01	complete	1	1	GCF_900172015.1
685	KLPN.1018.00526.0064	integron_01	complete	1	1	GCF_900512035.1
686	KLPN.1018.00526.0071	integron_01	CALIN	2	2	GCF_900512035.1
687	KLPN.1018.00527.0007	integron_01	complete	3	6	GCF_002775495.1
688	KLPN.1018.00530.0015	integron_01	complete	1	1	GCF_900515495.1
689	KLPN.1018.00533.0007	integron_01	complete	1	1	GCF_001033675.1
690	KLPN.1018.00534.0004	integron_01	complete	1	3	GCF_001031175.1
691	KLPN.1018.00534.0019	integron_01	CALIN	2	3	GCF_001031175.1
692	KLPN.1018.00534.0019	integron_02	complete	1	1	GCF_001031175.1
693	KLPN.1018.00536.0019	integron_01	In0		1	GCF_001033925.1
694	KLPN.1018.00538.0019	integron_01	complete	3	5	GCF_001031895.1
695	KLPN.1018.00539.0002	integron_01	complete	1	3	GCF_001032275.1
696	KLPN.1018.00539.0019	integron_01	complete	1	2	GCF_001032275.1
697	KLPN.1018.00539.0019	integron_02	CALIN	2	4	GCF_001032275.1
698	KLPN.1018.00544.0019	integron_01	complete	2	2	GCF_001034165.1
699	KLPN.1018.00544.0022	integron_01	complete	3	5	GCF_001034165.1
700	KLPN.1018.00545.0018	integron_01	complete	3	4	GCF_001033415.1
701	KLPN.1018.00545.0018	integron_02	CALIN	2	3	GCF_001033415.1
702	KLPN.1018.00547.0021	integron_01	complete	1	3	GCF_001031185.1
703	KLPN.1018.00547.0022	integron_01	CALIN	2	4	GCF_001031185.1
704	KLPN.1018.00549.0005	integron_01	complete	1	3	GCF_001032375.1
705	KLPN.1018.00549.0020	integron_01	complete	1	2	GCF_001032375.1
706	KLPN.1018.00549.0020	integron_02	CALIN	2	4	GCF_001032375.1
707	KLPN.1018.00552.0006	integron_01	complete	1	3	GCF_001032925.1
708	KLPN.1018.00552.0027	integron_01	complete	1	3	GCF_001032925.1
709	KLPN.1018.00552.0028	integron_01	CALIN	2	3	GCF_001032925.1
710	KLPN.1018.00553.0020	integron_01	complete	3	4	GCF_001032875.1
711	KLPN.1018.00553.0025	integron_01	CALIN	3	4	GCF_001032875.1
712	KLPN.1018.00553.0025	integron_02	complete	1	1	GCF_001032875.1
713	KLPN.1018.00557.0035	integron_01	complete	1	1	GCF_900492895.1
714	KLPN.1018.00559.0006	integron_01	complete	1	2	GCF_900092855.1
715	KLPN.1018.00559.0009	integron_01	CALIN	2	2	GCF_900092855.1
716	KLPN.1018.00560.0016	integron_01	complete	3	4	GCF_000694355.1
717	KLPN.1018.00560.0031	integron_01	complete	1	3	GCF_000694355.1
718	KLPN.1018.00560.0041	integron_01	CALIN	3	2	GCF_000694355.1
719	KLPN.1018.00561.0002	integron_01	CALIN	2	2	GCF_900093315.1
720	KLPN.1018.00561.0009	integron_01	complete	1	1	GCF_900093315.1
721	KLPN.1018.00564.0025	integron_01	complete	1	1	GCF_900510945.1
722	KLPN.1018.00564.0041	integron_01	CALIN	2	2	GCF_900510945.1
723	KLPN.1018.00573.0002	integron_01	complete	1	1	GCF_900493125.1
724	KLPN.1018.00573.0037	integron_01	CALIN	2	3	GCF_900493125.1
725	KLPN.1018.00577.0006	integron_01	complete	1	1	GCF_900506075.1
726	KLPN.1018.00577.0038	integron_01	CALIN	2	2	GCF_900506075.1
727	KLPN.1018.00578.0002	integron_01	CALIN	2	7	GCF_900093095.1
728	KLPN.1018.00578.0002	integron_02	complete	1	1	GCF_900093095.1
729	KLPN.1018.00582.0019	integron_01	complete	1	1	GCF_900512305.1
730	KLPN.1018.00583.0013	integron_01	complete	1	1	GCF_900493205.1
731	KLPN.1018.00583.0018	integron_01	CALIN	2	3	GCF_900493205.1
732	KLPN.1018.00586.0036	integron_01	CALIN	2	2	GCF_900496825.1
733	KLPN.1018.00586.0045	integron_01	CALIN	2	1	GCF_900496825.1
734	KLPN.1018.00588.0018	integron_01	CALIN	2	1	GCF_900511505.1
735	KLPN.1018.00588.0031	integron_01	CALIN	2	2	GCF_900511505.1
736	KLPN.1018.00589.0013	integron_01	CALIN	2	3	GCF_900493925.1
737	KLPN.1018.00589.0055	integron_01	complete	3	4	GCF_900493925.1
738	KLPN.1018.00590.0006	integron_01	CALIN	4	10	GCF_002866545.1
739	KLPN.1018.00590.0006	integron_02	complete	1	2	GCF_002866545.1
740	KLPN.1018.00590.0007	integron_01	CALIN	2	1	GCF_002866545.1
741	KLPN.1018.00591.0037	integron_01	CALIN	2	2	GCF_900512945.1
742	KLPN.1018.00591.0048	integron_01	complete	1	1	GCF_900512945.1
743	KLPN.1018.00592.0049	integron_01	In0		1	GCF_900494355.1
744	KLPN.1018.00594.0030	integron_01	CALIN	2	2	GCF_900515235.1
745	KLPN.1018.00594.0049	integron_01	complete	1	2	GCF_900515235.1
746	KLPN.1018.00596.0034	integron_01	CALIN	2	2	GCF_900504455.1
747	KLPN.1018.00596.0052	integron_01	CALIN	2	1	GCF_900504455.1
748	KLPN.1018.00598.0053	integron_01	complete	1	1	GCF_900171865.1
749	KLPN.1018.00599.0020	integron_01	CALIN	2	2	GCF_900492905.1
750	KLPN.1018.00599.0048	integron_01	complete	3	5	GCF_900492905.1
751	KLPN.1018.00601.0027	integron_01	complete	1	1	GCF_900515065.1
752	KLPN.1018.00601.0071	integron_01	CALIN	2	2	GCF_900515065.1
753	KLPN.1018.00602.0023	integron_01	complete	1	1	GCF_000498775.2
754	KLPN.1018.00602.0031	integron_01	CALIN	2	3	GCF_000498775.2
755	KLPN.1018.00606.0052	integron_01	complete	1	1	GCF_900512635.1
756	KLPN.1018.00609.0055	integron_01	CALIN	3	3	GCF_003036735.1
757	KLPN.1018.00609.0072	integron_01	In0		1	GCF_003036735.1
758	KLPN.1018.00614.0144	integron_01	CALIN	2	1	GCF_900507435.1
759	KLPN.1018.00618.0020	integron_01	complete	1	2	GCF_000566905.1
760	KLPN.1018.00620.0022	integron_01	complete	2	3	GCF_000492595.1
761	KLPN.1018.00623.0013	integron_01	complete	1	3	GCF_001033365.1
762	KLPN.1018.00623.0020	integron_01	complete	1	2	GCF_001033365.1
763	KLPN.1018.00623.0020	integron_02	CALIN	2	4	GCF_001033365.1
764	KLPN.1018.00625.0004	integron_01	complete	1	3	GCF_001031145.1
765	KLPN.1018.00625.0021	integron_01	CALIN	2	4	GCF_001031145.1
766	KLPN.1018.00626.0019	integron_01	complete	2	3	GCF_000492355.1
767	KLPN.1018.00627.0021	integron_01	complete	1	2	GCF_001032845.1
768	KLPN.1018.00628.0016	integron_01	complete	2	5	GCF_001032185.1
769	KLPN.1018.00629.0026	integron_01	CALIN	2	3	GCF_001185665.1
770	KLPN.1018.00630.0022	integron_01	CALIN	3	5	GCF_001033725.1
771	KLPN.1018.00631.0014	integron_01	complete	3	4	GCF_001033045.1
772	KLPN.1018.00631.0022	integron_01	complete	1	3	GCF_001033045.1
773	KLPN.1018.00632.0006	integron_01	In0		1	GCF_000567405.1
774	KLPN.1018.00632.0006	integron_02	complete	1	1	GCF_000567405.1
775	KLPN.1018.00632.0012	integron_01	CALIN	2	3	GCF_000567405.1
776	KLPN.1018.00632.0025	integron_01	In0		1	GCF_000567405.1
777	KLPN.1018.00635.0027	integron_01	complete	3	4	GCF_000567545.1
778	KLPN.1018.00636.0012	integron_01	CALIN	2	4	GCF_001034295.1
779	KLPN.1018.00636.0022	integron_01	complete	3	4	GCF_001034295.1
780	KLPN.1018.00637.0018	integron_01	complete	1	3	GCF_000694655.1
781	KLPN.1018.00637.0029	integron_01	CALIN	2	2	GCF_000694655.1
782	KLPN.1018.00637.0030	integron_01	complete	4	6	GCF_000694655.1
783	KLPN.1018.00639.0005	integron_01	CALIN	2	2	GCF_900093815.1
784	KLPN.1018.00640.0039	integron_01	complete	1	1	GCF_900507535.1
785	KLPN.1018.00642.0011	integron_01	complete	3	4	GCF_900093115.1
786	KLPN.1018.00642.0031	integron_01	CALIN	2		GCF_900093115.1
787	KLPN.1018.00645.0007	integron_01	complete	1	1	GCF_900173125.1
788	KLPN.1018.00645.0038	integron_01	CALIN	2	2	GCF_900173125.1
789	KLPN.1018.00646.0011	integron_01	CALIN	2	3	GCF_900508755.1
790	KLPN.1018.00646.0035	integron_01	In0		1	GCF_900508755.1
791	KLPN.1018.00647.0030	integron_01	In0		1	GCF_000694495.1
792	KLPN.1018.00648.0032	integron_01	CALIN	2	4	GCF_001185915.1
793	KLPN.1018.00648.0035	integron_01	CALIN	2	3	GCF_001185915.1
794	KLPN.1018.00650.0041	integron_01	complete	3	4	GCF_900173045.1
795	KLPN.1018.00652.0007	integron_01	CALIN	2	2	GCF_000981955.1
796	KLPN.1018.00652.0015	integron_01	CALIN	3	4	GCF_000981955.1
797	KLPN.1018.00654.0008	integron_01	complete	1	1	GCF_900507245.1
798	KLPN.1018.00656.0010	integron_01	CALIN	2	3	GCF_900492835.1
799	KLPN.1018.00656.0018	integron_01	complete	1	1	GCF_900492835.1
800	KLPN.1018.00657.0018	integron_01	CALIN	2	1	GCF_900511365.1
801	KLPN.1018.00657.0042	integron_01	CALIN	2	2	GCF_900511365.1
802	KLPN.1018.00658.0025	integron_01	CALIN	2	1	GCF_900512625.1
803	KLPN.1018.00661.0005	integron_01	CALIN	2	2	GCF_900093105.1
804	KLPN.1018.00661.0035	integron_01	In0		1	GCF_900093105.1
805	KLPN.1018.00662.0013	integron_01	complete	1	2	GCF_900493295.1
806	KLPN.1018.00662.0042	integron_01	CALIN	2	3	GCF_900493295.1
807	KLPN.1018.00664.0050	integron_01	complete	1	1	GCF_900493455.1
808	KLPN.1018.00665.0037	integron_01	complete	2	1	GCF_900514505.1
809	KLPN.1018.00668.0043	integron_01	CALIN	2	1	GCF_900092705.1
810	KLPN.1018.00670.0042	integron_01	complete	1	1	GCF_900513635.1
811	KLPN.1018.00670.0046	integron_01	CALIN	2	2	GCF_900513635.1
812	KLPN.1018.00671.0024	integron_01	complete	1	1	GCF_900093125.1
813	KLPN.1018.00671.0035	integron_01	CALIN	2	3	GCF_900093125.1
814	KLPN.1018.00673.0026	integron_01	CALIN	4	10	GCF_900513535.1
815	KLPN.1018.00673.0039	integron_01	CALIN	3	3	GCF_900513535.1
816	KLPN.1018.00674.0033	integron_01	complete	1	1	GCF_900511675.1
817	KLPN.1018.00676.0014	integron_01	complete	2	3	GCF_900493615.1
818	KLPN.1018.00676.0040	integron_01	CALIN	2	3	GCF_900493615.1
819	KLPN.1018.00678.0027	integron_01	complete	1	2	GCF_900511285.1
820	KLPN.1018.00678.0059	integron_01	CALIN	2	2	GCF_900511285.1
821	KLPN.1018.00685.0042	integron_01	complete	1	2	GCF_900511595.1
822	KLPN.1018.00685.0068	integron_01	CALIN	2	2	GCF_900511595.1
823	KLPN.1018.00688.0045	integron_01	complete	3	4	GCF_900513555.1
824	KLPN.1018.00689.0030	integron_01	complete	3	5	GCF_900092835.1
825	KLPN.1018.00692.0015	integron_01	complete	3	4	GCF_002775595.1
826	KLPN.1018.00692.0026	integron_01	CALIN	2	3	GCF_002775595.1
827	KLPN.1018.00694.0066	integron_01	complete	1	2	GCF_900508625.1
828	KLPN.1018.00694.0085	integron_01	CALIN	2	2	GCF_900508625.1
829	KLPN.1018.00697.0012	integron_01	In0		1	GCF_900092935.1
830	KLPN.1018.00699.0164	integron_01	CALIN	3	3	GCF_003037975.1
831	KLPN.1018.00699.0175	integron_01	CALIN	2	3	GCF_003037975.1
832	KLPN.1018.00699.0205	integron_01	In0		1	GCF_003037975.1
833	KLPN.1018.00701.0009	integron_01	complete	2	4	GCF_000567605.1
834	KLPN.1018.00701.0009	integron_02	complete	1	1	GCF_000567605.1
835	KLPN.1018.00703.0018	integron_01	complete	2	3	GCF_001031795.1
836	KLPN.1018.00705.0020	integron_01	complete	2	4	GCF_000567645.1
837	KLPN.1018.00706.0003	integron_01	complete	1	3	GCF_001032025.1
838	KLPN.1018.00706.0025	integron_01	complete	1	3	GCF_001032025.1
839	KLPN.1018.00706.0025	integron_02	CALIN	2	4	GCF_001032025.1
840	KLPN.1018.00708.0021	integron_01	CALIN	2	4	GCF_001031635.1
841	KLPN.1018.00708.0021	integron_02	complete	1	2	GCF_001031635.1
842	KLPN.1018.00708.0022	integron_01	complete	2	2	GCF_001031635.1
843	KLPN.1018.00710.0004	integron_01	complete	1	3	GCF_001031825.1
844	KLPN.1018.00710.0007	integron_01	CALIN	2	4	GCF_001031825.1
845	KLPN.1018.00710.0009	integron_01	complete	1	3	GCF_001031825.1
846	KLPN.1018.00711.0005	integron_01	CALIN	2	2	GCF_900084875.1
847	KLPN.1018.00712.0008	integron_01	In0		1	GCF_001032815.1
848	KLPN.1018.00712.0024	integron_01	complete	1	3	GCF_001032815.1
849	KLPN.1018.00712.0025	integron_01	CALIN	2	3	GCF_001032815.1
850	KLPN.1018.00713.0022	integron_01	complete	1	3	GCF_001033885.1
851	KLPN.1018.00713.0022	integron_02	complete	4	7	GCF_001033885.1
852	KLPN.1018.00714.0006	integron_01	complete	1	2	GCF_001031305.1
853	KLPN.1018.00714.0026	integron_01	complete	1	2	GCF_001031305.1
854	KLPN.1018.00714.0028	integron_01	CALIN	2	4	GCF_001031305.1
855	KLPN.1018.00716.0018	integron_01	complete	3	4	GCF_000707985.1
856	KLPN.1018.00716.0018	integron_02	CALIN	2	3	GCF_000707985.1
857	KLPN.1018.00716.0028	integron_01	CALIN	2	4	GCF_000707985.1
858	KLPN.1018.00719.0023	integron_01	CALIN	2	5	GCF_001030995.1
859	KLPN.1018.00719.0031	integron_01	CALIN	2	4	GCF_001030995.1
860	KLPN.1018.00719.0036	integron_01	CALIN	2	1	GCF_001030995.1
861	KLPN.1018.00721.0030	integron_01	CALIN	2	4	GCF_000693235.1
862	KLPN.1018.00724.0004	integron_01	complete	2	3	GCF_000982215.1
863	KLPN.1018.00724.0009	integron_01	CALIN	3	4	GCF_000982215.1
864	KLPN.1018.00725.0031	integron_01	CALIN	2	3	GCF_900506465.1
865	KLPN.1018.00733.0022	integron_01	complete	3	6	GCF_900093425.1
866	KLPN.1018.00735.0014	integron_01	In0		1	GCF_900509975.1
867	KLPN.1018.00738.0025	integron_01	complete	1	3	GCF_001032265.1
868	KLPN.1018.00739.0034	integron_01	complete	1	1	GCF_900504805.1
869	KLPN.1018.00739.0046	integron_01	CALIN	2	2	GCF_900504805.1
870	KLPN.1018.00742.0006	integron_01	CALIN	4	5	GCF_000773875.1
871	KLPN.1018.00742.0018	integron_01	CALIN	2	3	GCF_000773875.1
872	KLPN.1018.00742.0033	integron_01	complete	1	2	GCF_000773875.1
873	KLPN.1018.00743.0044	integron_01	complete	3	5	GCF_900093015.1
874	KLPN.1018.00745.0027	integron_01	CALIN	2	2	GCF_900511575.1
875	KLPN.1018.00745.0037	integron_01	complete	3	4	GCF_900511575.1
876	KLPN.1018.00748.0045	integron_01	complete	3	4	GCF_900507355.1
877	KLPN.1018.00748.0048	integron_01	CALIN	2	2	GCF_900507355.1
878	KLPN.1018.00754.0019	integron_01	complete	1	1	GCF_900507965.1
879	KLPN.1018.00754.0030	integron_01	CALIN	2	2	GCF_900507965.1
880	KLPN.1018.00756.0043	integron_01	complete	1	1	GCF_900500755.1
881	KLPN.1018.00756.0044	integron_01	CALIN	3	5	GCF_900500755.1
882	KLPN.1018.00756.0054	integron_01	CALIN	2	2	GCF_900500755.1
883	KLPN.1018.00757.0044	integron_01	complete	1	1	GCF_900513655.1
884	KLPN.1018.00758.0058	integron_01	complete	2	5	GCF_900173885.1
885	KLPN.1018.00761.0069	integron_01	complete	1	1	GCF_900503685.1
886	KLPN.1018.00761.0070	integron_01	CALIN	2	2	GCF_900503685.1
887	KLPN.1018.00762.0001	integron_01	complete	2	4	GCF_002775445.1
888	KLPN.1018.00763.0065	integron_01	CALIN	2	2	GCF_900093175.1
889	KLPN.1018.00765.0053	integron_01	CALIN	2	6	GCF_900514405.1
890	KLPN.1018.00766.0039	integron_01	In0		1	GCF_900508745.1
891	KLPN.1018.00766.0064	integron_01	CALIN	2	3	GCF_900508745.1
892	KLPN.1018.00767.0003	integron_01	complete	3	4	GCF_002866505.1
893	KLPN.1018.00767.0015	integron_01	CALIN	3	5	GCF_002866505.1
894	KLPN.1018.00769.0017	integron_01	CALIN	2	4	GCF_003038115.1
895	KLPN.1018.00769.0020	integron_01	complete	2	4	GCF_003038115.1
896	KLPN.1018.00770.0082	integron_01	complete	1	2	GCF_900510885.1
897	KLPN.1018.00770.0091	integron_01	CALIN	2	2	GCF_900510885.1
898	KLPN.1018.00771.0016	integron_01	complete	1	2	GCF_900505615.1
899	KLPN.1018.00771.0058	integron_01	CALIN	2	2	GCF_900505615.1
900	KLPN.1018.00771.0060	integron_01	CALIN	2	4	GCF_900505615.1
901	KLPN.1018.00772.0017	integron_01	CALIN	2	2	GCF_900507475.1
902	KLPN.1018.00772.0051	integron_01	complete	1	2	GCF_900507475.1
903	KLPN.1018.00773.0097	integron_01	complete	1	2	GCF_900092975.1
904	KLPN.1018.00774.0048	integron_01	CALIN	2	2	GCF_900503665.1
905	KLPN.1018.00776.0028	integron_01	CALIN	2	2	GCF_900507265.1
906	KLPN.1018.00776.0071	integron_01	complete	2	2	GCF_900507265.1
907	KLPN.1018.00777.0082	integron_01	CALIN	3	3	GCF_003037335.1
908	KLPN.1018.00777.0089	integron_01	CALIN	2	3	GCF_003037335.1
909	KLPN.1018.00777.0123	integron_01	In0		1	GCF_003037335.1
910	KLPN.1018.00778.0073	integron_01	complete	3	4	GCF_900504835.1
911	KLPN.1018.00781.0198	integron_01	CALIN	2	2	GCF_900508235.1
912	KLPN.1018.00781.0217	integron_01	complete	1	1	GCF_900508235.1
913	KLPN.1018.00783.0020	integron_01	complete	1	3	GCF_001030945.1
914	KLPN.1018.00784.0023	integron_01	complete	1	1	GCF_001032205.1
915	KLPN.1018.00786.0025	integron_01	CALIN	2	3	GCF_000567725.1
916	KLPN.1018.00788.0025	integron_01	complete	1	2	GCF_000567125.1
917	KLPN.1018.00789.0023	integron_01	complete	1	2	GCF_001032775.1
918	KLPN.1018.00790.0002	integron_01	CALIN	3	5	GCF_000492515.1
919	KLPN.1018.00793.0006	integron_01	complete	1	3	GCF_001032115.1
920	KLPN.1018.00793.0026	integron_01	complete	1	2	GCF_001032115.1
921	KLPN.1018.00793.0026	integron_02	CALIN	2	4	GCF_001032115.1
922	KLPN.1018.00794.0028	integron_01	complete	1	4	GCF_001031545.1
923	KLPN.1018.00796.0029	integron_01	CALIN	2	4	GCF_001032455.1
924	KLPN.1018.00796.0036	integron_01	complete	1	3	GCF_001032455.1
925	KLPN.1018.00797.0018	integron_01	complete	6	7	GCF_002269865.1
926	KLPN.1018.00798.0013	integron_01	complete	1	3	GCF_000693775.1
927	KLPN.1018.00798.0033	integron_01	CALIN	2	4	GCF_000693775.1
928	KLPN.1018.00799.0021	integron_01	CALIN	2	4	GCF_000693415.1
929	KLPN.1018.00799.0025	integron_01	complete	1	3	GCF_000693415.1
930	KLPN.1018.00799.0037	integron_01	CALIN	2	4	GCF_000693415.1
931	KLPN.1018.00799.0038	integron_01	CALIN	2	3	GCF_000693415.1
932	KLPN.1018.00802.0031	integron_01	complete	1	2	GCF_000567285.1
933	KLPN.1018.00802.0035	integron_01	CALIN	2	2	GCF_000567285.1
934	KLPN.1018.00803.0039	integron_01	CALIN	2	1	GCF_900515895.1
935	KLPN.1018.00805.0028	integron_01	CALIN	2	4	GCF_000694035.1
936	KLPN.1018.00805.0029	integron_01	complete	1	3	GCF_000694035.1
937	KLPN.1018.00806.0042	integron_01	complete	4	5	GCF_900492985.1
938	KLPN.1018.00807.0010	integron_01	complete	1	1	GCF_900493465.1
939	KLPN.1018.00812.0013	integron_01	complete	1	1	GCF_900093085.1
940	KLPN.1018.00813.0016	integron_01	CALIN	2	1	GCF_001701585.1
941	KLPN.1018.00816.0025	integron_01	complete	3	8	GCF_002851495.1
942	KLPN.1018.00818.0045	integron_01	complete	3	3	GCF_900092965.1
943	KLPN.1018.00819.0002	integron_01	complete	4	5	GCF_900509125.1
944	KLPN.1018.00821.0028	integron_01	complete	1	3	GCF_900501425.1
945	KLPN.1018.00822.0030	integron_01	complete	4	4	GCF_900509995.1
946	KLPN.1018.00823.0008	integron_01	CALIN	2	3	GCF_900505005.1
947	KLPN.1018.00823.0039	integron_01	complete	1	1	GCF_900505005.1
948	KLPN.1018.00824.0012	integron_01	CALIN	2	3	GCF_900093135.1
949	KLPN.1018.00826.0020	integron_01	complete	1	1	GCF_900492915.1
950	KLPN.1018.00826.0042	integron_01	CALIN	2	3	GCF_900492915.1
951	KLPN.1018.00835.0037	integron_01	complete	1	1	GCF_900517045.1
952	KLPN.1018.00836.0012	integron_01	CALIN	3	4	GCF_900172955.1
953	KLPN.1018.00836.0054	integron_01	complete	1	1	GCF_900172955.1
954	KLPN.1018.00840.0014	integron_01	complete	1	1	GCF_900493935.1
955	KLPN.1018.00841.0044	integron_01	complete	1	2	GCF_900514165.1
956	KLPN.1018.00843.0047	integron_01	CALIN	2	2	GCF_900513595.1
957	KLPN.1018.00843.0060	integron_01	complete	2	4	GCF_900513595.1
958	KLPN.1018.00845.0045	integron_01	CALIN	2	2	GCF_900501625.1
959	KLPN.1018.00846.0020	integron_01	CALIN	2	2	GCF_900508985.1
960	KLPN.1018.00846.0044	integron_01	complete	2	4	GCF_900508985.1
961	KLPN.1018.00847.0043	integron_01	CALIN	2	2	GCF_900516655.1
962	KLPN.1018.00847.0053	integron_01	complete	1	2	GCF_900516655.1
963	KLPN.1018.00848.0048	integron_01	CALIN	2	2	GCF_900517385.1
964	KLPN.1018.00848.0053	integron_01	complete	1	2	GCF_900517385.1
965	KLPN.1018.00849.0029	integron_01	CALIN	3	2	GCF_900501615.1
966	KLPN.1018.00849.0056	integron_01	CALIN	5	4	GCF_900501615.1
967	KLPN.1018.00849.0058	integron_01	In0		1	GCF_900501615.1
968	KLPN.1018.00852.0035	integron_01	CALIN	2	4	GCF_900501595.1
969	KLPN.1018.00852.0062	integron_01	In0		1	GCF_900501595.1
970	KLPN.1018.00854.0036	integron_01	complete	1	2	GCF_900506575.1
971	KLPN.1018.00854.0059	integron_01	CALIN	2	2	GCF_900506575.1
972	KLPN.1018.00856.0018	integron_01	complete	1	2	GCF_900512905.1
973	KLPN.1018.00856.0054	integron_01	CALIN	2	3	GCF_900512905.1
974	KLPN.1018.00857.0054	integron_01	complete	3	6	GCF_900492845.1
975	KLPN.1018.00858.0043	integron_01	complete	3	4	GCF_900493285.1
976	KLPN.1018.00858.0066	integron_01	CALIN	2	3	GCF_900493285.1
977	KLPN.1018.00861.0041	integron_01	complete	2	3	GCF_900501435.1
978	KLPN.1018.00863.0063	integron_01	complete	1	2	GCF_900512365.1
979	KLPN.1018.00863.0075	integron_01	CALIN	2	3	GCF_900512365.1
980	KLPN.1018.00866.0077	integron_01	complete	1	3	GCF_900507525.1
981	KLPN.1018.00866.0079	integron_01	CALIN	2	2	GCF_900507525.1
982	KLPN.1018.00872.0057	integron_01	complete	1	1	GCF_900504775.1
983	KLPN.1018.00872.0059	integron_01	CALIN	2	2	GCF_900504775.1
984	KLPN.1018.00873.0008	integron_01	complete	1	1	GCF_900493785.1
985	KLPN.1018.00873.0070	integron_01	CALIN	2	3	GCF_900493785.1
986	KLPN.1018.00874.0041	integron_01	complete	4	5	GCF_002991725.1
987	KLPN.1018.00875.0064	integron_01	complete	3	4	GCF_003037655.1
988	KLPN.1018.00877.0084	integron_01	complete	1	1	GCF_900172905.1
989	KLPN.1018.00877.0123	integron_01	CALIN	2	2	GCF_900172905.1
990	KLPN.1018.00879.0030	integron_01	In0		1	GCF_900517445.1
991	KLPN.1018.00880.0115	integron_01	In0		1	GCF_900172885.1
992	KLPN.1018.00883.0086	integron_01	CALIN	4	4	GCF_900503005.1
993	KLPN.1018.00884.0145	integron_01	CALIN	2	2	GCF_900172975.1
994	KLPN.1018.00885.0087	integron_01	complete	2	3	GCF_900503215.1
995	KLPN.1018.00886.0077	integron_01	CALIN	2	2	GCF_900507285.1
996	KLPN.1018.00886.0108	integron_01	complete	3	4	GCF_900507285.1
997	KLPN.1018.00887.0102	integron_01	complete	1	2	GCF_900517585.1
998	KLPN.1018.00887.0125	integron_01	CALIN	3	5	GCF_900517585.1
999	KLPN.1018.00887.0159	integron_01	CALIN	2	2	GCF_900517585.1
1000	KLPN.1018.00888.0177	integron_01	CALIN	2	3	GCF_900508725.1
1001	KLPN.1018.00888.0221	integron_01	In0		1	GCF_900508725.1
1002	KLPN.1018.00894.0008	integron_01	complete	1	3	GCF_001031995.1
1003	KLPN.1018.00896.0026	integron_01	CALIN	2	3	GCF_001031475.1
1004	KLPN.1018.00896.0027	integron_01	complete	1	1	GCF_001031475.1
1005	KLPN.1018.00897.0027	integron_01	complete	2	4	GCF_001034055.1
1006	KLPN.1018.00897.0029	integron_01	complete	1	2	GCF_001034055.1
1007	KLPN.1018.00899.0027	integron_01	complete	1	2	GCF_001031745.1
1008	KLPN.1018.00900.0030	integron_01	complete	1	3	GCF_001033135.1
1009	KLPN.1018.00900.0032	integron_01	CALIN	2	3	GCF_001033135.1
1010	KLPN.1018.00902.0024	integron_01	CALIN	2	3	GCF_000492195.1
1011	KLPN.1018.00903.0028	integron_01	complete	2	3	GCF_001032685.1
1012	KLPN.1018.00904.0008	integron_01	complete	1	3	GCF_000694015.1
1013	KLPN.1018.00904.0029	integron_01	complete	1	3	GCF_000694015.1
1014	KLPN.1018.00906.0012	integron_01	complete	1	3	GCF_001032605.1
1015	KLPN.1018.00906.0030	integron_01	CALIN	2	4	GCF_001032605.1
1016	KLPN.1018.00908.0005	integron_01	CALIN	2	3	GCF_900492865.1
1017	KLPN.1018.00908.0030	integron_01	complete	3	4	GCF_900492865.1
1018	KLPN.1018.00911.0007	integron_01	CALIN	2	3	GCF_001185865.1
1019	KLPN.1018.00911.0012	integron_01	CALIN	2	2	GCF_001185865.1
1020	KLPN.1018.00911.0019	integron_01	complete	3	4	GCF_001185865.1
1021	KLPN.1018.00911.0038	integron_01	complete	3	5	GCF_001185865.1
1022	KLPN.1018.00912.0018	integron_01	CALIN	2	2	GCF_002854175.1
1023	KLPN.1018.00912.0022	integron_01	complete	1	1	GCF_002854175.1
1024	KLPN.1018.00913.0015	integron_01	CALIN	2	2	GCF_900173075.1
1025	KLPN.1018.00913.0016	integron_01	complete	1	1	GCF_900173075.1
1026	KLPN.1018.00914.0020	integron_01	CALIN	2	1	GCF_001701615.1
1027	KLPN.1018.00916.0041	integron_01	CALIN	2	2	GCF_000822145.1
1028	KLPN.1018.00923.0020	integron_01	CALIN	2	2	GCF_001466765.1
1029	KLPN.1018.00928.0032	integron_01	CALIN	5	6	GCF_000300835.1
1030	KLPN.1018.00928.0039	integron_01	CALIN	5	5	GCF_000300835.1
1031	KLPN.1018.00928.0046	integron_01	In0		1	GCF_000300835.1
1032	KLPN.1018.00930.0041	integron_01	complete	1	1	GCF_900493025.1
1033	KLPN.1018.00930.0051	integron_01	CALIN	2	3	GCF_900493025.1
1034	KLPN.1018.00931.0011	integron_01	complete	1	1	GCF_900506595.1
1035	KLPN.1018.00931.0050	integron_01	CALIN	2	2	GCF_900506595.1
1036	KLPN.1018.00932.0011	integron_01	In0		1	GCF_002851135.1
1037	KLPN.1018.00932.0014	integron_01	CALIN	2	1	GCF_002851135.1
1038	KLPN.1018.00932.0048	integron_01	CALIN	3	2	GCF_002851135.1
1039	KLPN.1018.00934.0028	integron_01	CALIN	2	3	GCF_900493085.1
1040	KLPN.1018.00934.0030	integron_01	complete	1	1	GCF_900493085.1
1041	KLPN.1018.00936.0042	integron_01	complete	3	5	GCF_900493075.1
1042	KLPN.1018.00939.0038	integron_01	complete	2	3	GCF_900512745.1
1043	KLPN.1018.00943.0043	integron_01	complete	1	1	GCF_900093445.1
1044	KLPN.1018.00948.0005	integron_01	In0		1	GCF_002775175.1
1045	KLPN.1018.00948.0008	integron_01	CALIN	2	2	GCF_002775175.1
1046	KLPN.1018.00948.0017	integron_01	CALIN	3	3	GCF_002775175.1
1047	KLPN.1018.00949.0045	integron_01	complete	2	3	GCF_900508405.1
1048	KLPN.1018.00950.0042	integron_01	CALIN	2	2	GCF_900509025.1
1049	KLPN.1018.00953.0051	integron_01	complete	1	1	GCF_900508635.1
1050	KLPN.1018.00955.0068	integron_01	CALIN	2	2	GCF_900504135.1
1051	KLPN.1018.00956.0059	integron_01	complete	1	2	GCF_900517575.1
1052	KLPN.1018.00960.0030	integron_01	complete	1	2	GCF_900517235.1
1053	KLPN.1018.00960.0051	integron_01	CALIN	2	2	GCF_900517235.1
1054	KLPN.1018.00961.0020	integron_01	complete	3	4	GCF_900494505.1
1055	KLPN.1018.00964.0066	integron_01	complete	1	2	GCF_900511655.1
1056	KLPN.1018.00964.0069	integron_01	CALIN	2	2	GCF_900511655.1
1057	KLPN.1018.00968.0063	integron_01	complete	1	1	GCF_900493095.1
1058	KLPN.1018.00968.0072	integron_01	CALIN	2	3	GCF_900493095.1
1059	KLPN.1018.00969.0062	integron_01	complete	1	2	GCF_900515505.1
1060	KLPN.1018.00969.0075	integron_01	CALIN	2	2	GCF_900515505.1
1061	KLPN.1018.00971.0015	integron_01	complete	1	1	GCF_002775395.1
1062	KLPN.1018.00972.0065	integron_01	CALIN	2	1	GCF_900515445.1
1063	KLPN.1018.00980.0031	integron_01	CALIN	2	3	GCF_900511135.1
1064	KLPN.1018.00980.0074	integron_01	complete	2	3	GCF_900511135.1
1065	KLPN.1018.00982.0021	integron_01	CALIN	2	1	GCF_900501665.1
1066	KLPN.1018.00982.0045	integron_01	CALIN	2	3	GCF_900501665.1
1067	KLPN.1018.00983.0020	integron_01	CALIN	2	1	GCF_900501815.1
1068	KLPN.1018.00984.0052	integron_01	CALIN	2	2	GCF_900504015.1
1069	KLPN.1018.00984.0081	integron_01	In0		1	GCF_900504015.1
1070	KLPN.1018.00984.0086	integron_01	CALIN	3	4	GCF_900504015.1
1071	KLPN.1018.00985.0057	integron_01	In0		1	GCF_900504585.1
1072	KLPN.1018.00986.0083	integron_01	complete	1	1	GCF_900493235.1
1073	KLPN.1018.00986.0085	integron_01	CALIN	2	3	GCF_900493235.1
1074	KLPN.1018.00987.0040	integron_01	complete	3	4	GCF_900496805.1
1075	KLPN.1018.00990.0047	integron_01	CALIN	6	7	GCF_900507935.1
1076	KLPN.1018.00990.0103	integron_01	In0		1	GCF_900507935.1
1077	KLPN.1018.00992.0116	integron_01	complete	2	1	GCF_003583115.1
1078	KLPN.1018.00992.0118	integron_01	CALIN	2	3	GCF_003583115.1
1079	KLPN.1018.00993.0172	integron_01	CALIN	2	2	GCF_900515275.1
1080	KLPN.1018.00995.0278	integron_01	complete	2	2	GCF_900516405.1
1081	KLPN.1018.00995.0289	integron_01	CALIN	2	2	GCF_900516405.1
1082	KLPN.1018.00997.0026	integron_01	complete	3	4	GCF_001033975.1
1083	KLPN.1018.00998.0013	integron_01	In0		1	GCF_002855255.1
1084	KLPN.1018.01000.0030	integron_01	complete	1	2	GCF_000694235.1
1085	KLPN.1018.01000.0033	integron_01	CALIN	2	3	GCF_000694235.1
1086	KLPN.1018.01003.0027	integron_01	complete	1	1	GCF_000693815.1
1087	KLPN.1018.01004.0033	integron_01	complete	3	4	GCF_900492975.1
1088	KLPN.1018.01005.0036	integron_01	complete	1	3	GCF_000693575.1
1089	KLPN.1018.01005.0038	integron_01	CALIN	2	4	GCF_000693575.1
1090	KLPN.1018.01006.0014	integron_01	CALIN	5	3	GCF_002108315.1
1091	KLPN.1018.01006.0018	integron_01	CALIN	2	1	GCF_002108315.1
1092	KLPN.1018.01006.0024	integron_01	In0		1	GCF_002108315.1
1093	KLPN.1018.01008.0042	integron_01	complete	6	8	GCF_000567265.1
1094	KLPN.1018.01012.0031	integron_01	CALIN	2	2	GCF_002181915.1
1095	KLPN.1018.01016.0030	integron_01	complete	4	6	GCF_900493185.1
1096	KLPN.1018.01017.0041	integron_01	complete	2	4	GCF_900503415.1
1097	KLPN.1018.01017.0042	integron_01	CALIN	2	2	GCF_900503415.1
1098	KLPN.1018.01020.0037	integron_01	complete	1	1	GCF_900512385.1
1099	KLPN.1018.01020.0045	integron_01	CALIN	2	2	GCF_900512385.1
1100	KLPN.1018.01023.0048	integron_01	CALIN	2	3	GCF_900492815.1
1101	KLPN.1018.01023.0053	integron_01	complete	1	1	GCF_900492815.1
1102	KLPN.1018.01025.0015	integron_01	In0		1	GCF_900511035.1
1103	KLPN.1018.01025.0034	integron_01	CALIN	4	5	GCF_900511035.1
1104	KLPN.1018.01026.0012	integron_01	complete	4	6	GCF_900511125.1
1105	KLPN.1018.01029.0048	integron_01	In0		1	GCF_900513915.1
1106	KLPN.1018.01029.0051	integron_01	CALIN	2	2	GCF_900513915.1
1107	KLPN.1018.01030.0042	integron_01	complete	1	1	GCF_900512545.1
1108	KLPN.1018.01031.0044	integron_01	complete	2	4	GCF_900507845.1
1109	KLPN.1018.01034.0056	integron_01	CALIN	3	2	GCF_900508165.1
1110	KLPN.1018.01035.0044	integron_01	complete	3	4	GCF_900510655.1
1111	KLPN.1018.01035.0054	integron_01	CALIN	2	3	GCF_900510655.1
1112	KLPN.1018.01037.0014	integron_01	complete	3	6	GCF_002257775.1
1113	KLPN.1018.01038.0016	integron_01	CALIN	2	3	GCF_002853135.1
1114	KLPN.1018.01038.0032	integron_01	In0		1	GCF_002853135.1
1115	KLPN.1018.01041.0014	integron_01	CALIN	4	5	GCF_900508345.1
1116	KLPN.1018.01041.0021	integron_01	In0		1	GCF_900508345.1
1117	KLPN.1018.01041.0057	integron_01	CALIN	3	2	GCF_900508345.1
1118	KLPN.1018.01042.0042	integron_01	complete	1	1	GCF_900510075.1
1119	KLPN.1018.01046.0033	integron_01	In0		1	GCF_900501335.1
1120	KLPN.1018.01048.0030	integron_01	complete	1	1	GCF_001460475.1
1121	KLPN.1018.01048.0033	integron_01	CALIN	2	2	GCF_001460475.1
1122	KLPN.1018.01051.0049	integron_01	complete	3	4	GCF_900508845.1
1123	KLPN.1018.01051.0060	integron_01	CALIN	2	2	GCF_900508845.1
1124	KLPN.1018.01052.0045	integron_01	complete	1	1	GCF_900513715.1
1125	KLPN.1018.01052.0060	integron_01	CALIN	2	2	GCF_900513715.1
1126	KLPN.1018.01053.0033	integron_01	complete	1	3	GCF_001463445.1
1127	KLPN.1018.01056.0030	integron_01	complete	2	4	GCF_900504435.1
1128	KLPN.1018.01057.0051	integron_01	complete	1	3	GCF_900507895.1
1129	KLPN.1018.01058.0048	integron_01	complete	4	6	GCF_900511085.1
1130	KLPN.1018.01059.0013	integron_01	CALIN	2	1	GCF_900494445.1
1131	KLPN.1018.01061.0051	integron_01	complete	1	2	GCF_900506625.1
1132	KLPN.1018.01063.0022	integron_01	complete	1	2	GCF_900517255.1
1133	KLPN.1018.01066.0033	integron_01	CALIN	2	2	GCF_900506525.1
1134	KLPN.1018.01066.0039	integron_01	complete	1	1	GCF_900506525.1
1135	KLPN.1018.01069.0068	integron_01	complete	1	1	GCF_900507685.1
1136	KLPN.1018.01072.0012	integron_01	In0		1	GCF_900514115.1
1137	KLPN.1018.01072.0041	integron_01	CALIN	4	5	GCF_900514115.1
1138	KLPN.1018.01074.0074	integron_01	complete	4	5	GCF_900502825.1
1139	KLPN.1018.01077.0075	integron_01	complete	1	2	GCF_900508295.1
1140	KLPN.1018.01078.0065	integron_01	complete	1	2	GCF_900515715.1
1141	KLPN.1018.01080.0030	integron_01	complete	2	3	GCF_900501835.1
1142	KLPN.1018.01081.0049	integron_01	complete	2	1	GCF_900511645.1
1143	KLPN.1018.01081.0053	integron_01	CALIN	3	2	GCF_900511645.1
1144	KLPN.1018.01081.0062	integron_01	CALIN	2	2	GCF_900511645.1
1145	KLPN.1018.01084.0023	integron_01	complete	3	6	GCF_900493175.1
1146	KLPN.1018.01084.0027	integron_01	CALIN	2	1	GCF_900493175.1
1147	KLPN.1018.01085.0065	integron_01	complete	2	4	GCF_900507555.1
1148	KLPN.1018.01086.0016	integron_01	complete	1	1	GCF_002853515.1
1149	KLPN.1018.01088.0023	integron_01	complete	4	5	GCF_002257785.1
1150	KLPN.1018.01091.0041	integron_01	complete	2	3	GCF_900507375.1
1151	KLPN.1018.01092.0047	integron_01	complete	1	1	GCF_900516115.1
1152	KLPN.1018.01094.0060	integron_01	complete	3	6	GCF_900494325.1
1153	KLPN.1018.01094.0082	integron_01	CALIN	2	2	GCF_900494325.1
1154	KLPN.1018.01095.0003	integron_01	CALIN	5	4	GCF_900513975.1
1155	KLPN.1018.01095.0088	integron_01	In0		1	GCF_900513975.1
1156	KLPN.1018.01096.0048	integron_01	complete	3	6	GCF_002257875.1
1157	KLPN.1018.01098.0085	integron_01	complete	1	2	GCF_900093005.1
1158	KLPN.1018.01099.0081	integron_01	CALIN	4	3	GCF_900503645.1
1159	KLPN.1018.01100.0051	integron_01	complete	1	1	GCF_003583195.1
1160	KLPN.1018.01100.0060	integron_01	CALIN	2	3	GCF_003583195.1
1161	KLPN.1018.01101.0044	integron_01	complete	1	2	GCF_002258085.1
1162	KLPN.1018.01102.0088	integron_01	CALIN	2	2	GCF_900503715.1
1163	KLPN.1018.01103.0038	integron_01	In0		1	GCF_900506405.1
1164	KLPN.1018.01104.0053	integron_01	CALIN	3	6	GCF_900517755.1
1165	KLPN.1018.01104.0083	integron_01	CALIN	2	2	GCF_900517755.1
1166	KLPN.1018.01104.0131	integron_01	complete	1	1	GCF_900517755.1
1167	KLPN.1018.01105.0061	integron_01	In0		1	GCF_900092685.1
1168	KLPN.1018.01105.0062	integron_01	CALIN	5	4	GCF_900092685.1
1169	KLPN.1018.01105.0063	integron_01	CALIN	3	3	GCF_900092685.1
1170	KLPN.1018.01105.0129	integron_01	CALIN	2	1	GCF_900092685.1
1171	KLPN.1018.01106.0037	integron_01	CALIN	2	3	GCF_900504685.1
1172	KLPN.1018.01106.0099	integron_01	In0		1	GCF_900504685.1
1173	KLPN.1018.01106.0134	integron_01	CALIN	2	1	GCF_900504685.1
1174	KLPN.1018.01107.0066	integron_01	CALIN	6	7	GCF_900507925.1
1175	KLPN.1018.01107.0096	integron_01	In0		1	GCF_900507925.1
1176	KLPN.1018.01108.0158	integron_01	CALIN	2	2	GCF_900173415.1
1177	KLPN.1018.01109.0054	integron_01	CALIN	2	1	GCF_900505985.1
1178	KLPN.1018.01110.0070	integron_01	CALIN	2	2	GCF_900504895.1
1179	KLPN.1018.01110.0213	integron_01	complete	1	2	GCF_900504895.1
1180	KLPN.1018.01111.0225	integron_01	CALIN	2	2	GCF_900507235.1
1181	KLPN.1018.01112.0053	integron_01	CALIN	2	2	GCF_900500955.1
1182	KLPN.1018.01112.0150	integron_01	complete	1	2	GCF_900500955.1
1183	KLPN.1018.01115.0081	integron_01	CALIN	2	2	GCF_900517515.1
1184	KLPN.1018.01115.0136	integron_01	complete	3	4	GCF_900517515.1
1185	KLPN.1018.01119.0028	integron_01	complete	3	4	GCF_000300955.1
1186	KLPN.1018.01119.0032	integron_01	complete	1	3	GCF_000300955.1
1187	KLPN.1018.01121.0006	integron_01	complete	1	3	GCF_001031105.1
1188	KLPN.1018.01121.0034	integron_01	CALIN	2	3	GCF_001031105.1
1189	KLPN.1018.01121.0035	integron_01	CALIN	2	4	GCF_001031105.1
1190	KLPN.1018.01122.0005	integron_01	CALIN	2	1	GCF_000982085.1
1191	KLPN.1018.01122.0007	integron_01	CALIN	2	1	GCF_000982085.1
1192	KLPN.1018.01122.0013	integron_01	complete	2	4	GCF_000982085.1
1193	KLPN.1018.01122.0016	integron_01	CALIN	2	3	GCF_000982085.1
1194	KLPN.1018.01124.0008	integron_01	CALIN	2	2	GCF_900084125.1
1195	KLPN.1018.01124.0041	integron_01	complete	3	4	GCF_900084125.1
1196	KLPN.1018.01125.0030	integron_01	complete	3	4	GCF_900084145.1
1197	KLPN.1018.01125.0033	integron_01	CALIN	2	2	GCF_900084145.1
1198	KLPN.1018.01129.0038	integron_01	complete	1	3	GCF_900085155.1
1199	KLPN.1018.01131.0040	integron_01	complete	1	3	GCF_900503435.1
1200	KLPN.1018.01132.0001	integron_01	complete	1	1	GCF_001693715.1
1201	KLPN.1018.01132.0001	integron_02	CALIN	2	3	GCF_001693715.1
1202	KLPN.1018.01132.0038	integron_01	complete	1	1	GCF_001693715.1
1203	KLPN.1018.01132.0041	integron_01	CALIN	2	2	GCF_001693715.1
1204	KLPN.1018.01134.0035	integron_01	CALIN	2	2	GCF_002181945.1
1205	KLPN.1018.01136.0004	integron_01	complete	3	7	GCF_000474635.1
1206	KLPN.1018.01136.0009	integron_01	complete	1	1	GCF_000474635.1
1207	KLPN.1018.01136.0028	integron_01	CALIN	2	5	GCF_000474635.1
1208	KLPN.1018.01136.0049	integron_01	complete	1	4	GCF_000474635.1
1209	KLPN.1018.01144.0035	integron_01	CALIN	2	2	GCF_900510895.1
1210	KLPN.1018.01144.0043	integron_01	complete	3	4	GCF_900510895.1
1211	KLPN.1018.01145.0003	integron_01	CALIN	3	3	GCF_002850805.1
1212	KLPN.1018.01145.0004	integron_01	CALIN	3	2	GCF_002850805.1
1213	KLPN.1018.01147.0037	integron_01	CALIN	4	11	GCF_900503425.1
1214	KLPN.1018.01147.0042	integron_01	CALIN	2	1	GCF_900503425.1
1215	KLPN.1018.01147.0045	integron_01	complete	1	1	GCF_900503425.1
1216	KLPN.1018.01148.0015	integron_01	In0		1	GCF_900510995.1
1217	KLPN.1018.01148.0042	integron_01	CALIN	4	5	GCF_900510995.1
1218	KLPN.1018.01150.0011	integron_01	complete	4	5	GCF_900511095.1
1219	KLPN.1018.01151.0043	integron_01	complete	1	3	GCF_900507255.1
1220	KLPN.1018.01152.0047	integron_01	complete	1	1	GCF_000788005.1
1221	KLPN.1018.01152.0051	integron_01	CALIN	2	2	GCF_000788005.1
1222	KLPN.1018.01156.0051	integron_01	complete	1	1	GCF_900493345.1
1223	KLPN.1018.01156.0055	integron_01	CALIN	2	3	GCF_900493345.1
1224	KLPN.1018.01157.0011	integron_01	complete	2	3	GCF_900512765.1
1225	KLPN.1018.01160.0041	integron_01	complete	3	4	GCF_900514335.1
1226	KLPN.1018.01162.0038	integron_01	complete	1	2	GCF_900517225.1
1227	KLPN.1018.01162.0058	integron_01	CALIN	2	2	GCF_900517225.1
1228	KLPN.1018.01164.0043	integron_01	In0		1	GCF_900515705.1
1229	KLPN.1018.01164.0048	integron_01	CALIN	4	6	GCF_900515705.1
1230	KLPN.1018.01166.0019	integron_01	complete	2	4	GCF_900517825.1
1231	KLPN.1018.01166.0023	integron_01	CALIN	2	2	GCF_900517825.1
1232	KLPN.1018.01168.0050	integron_01	complete	1	2	GCF_900511665.1
1233	KLPN.1018.01170.0060	integron_01	In0		1	GCF_900509065.1
1234	KLPN.1018.01171.0011	integron_01	CALIN	2	5	GCF_900511245.1
1235	KLPN.1018.01173.0016	integron_01	complete	2	4	GCF_900503385.1
1236	KLPN.1018.01174.0036	integron_01	complete	6	8	GCF_900512595.1
1237	KLPN.1018.01174.0037	integron_01	CALIN	2	4	GCF_900512595.1
1238	KLPN.1018.01177.0037	integron_01	complete	3	6	GCF_900493005.1
1239	KLPN.1018.01179.0031	integron_01	In0		1	GCF_900513895.1
1240	KLPN.1018.01179.0059	integron_01	CALIN	4	5	GCF_900513895.1
1241	KLPN.1018.01179.0069	integron_01	CALIN	2	2	GCF_900513895.1
1242	KLPN.1018.01182.0058	integron_01	complete	1	1	GCF_900508255.1
1243	KLPN.1018.01183.0046	integron_01	CALIN	2	2	GCF_900507065.1
1244	KLPN.1018.01183.0062	integron_01	complete	1	2	GCF_900507065.1
1245	KLPN.1018.01185.0046	integron_01	CALIN	4	5	GCF_900511705.1
1246	KLPN.1018.01185.0071	integron_01	CALIN	3	2	GCF_900511705.1
1247	KLPN.1018.01186.0026	integron_01	complete	4	6	GCF_900494255.1
1248	KLPN.1018.01190.0028	integron_01	CALIN	2	2	GCF_900506065.1
1249	KLPN.1018.01190.0064	integron_01	CALIN	2	3	GCF_900506065.1
1250	KLPN.1018.01191.0055	integron_01	complete	3	4	GCF_900517525.1
1251	KLPN.1018.01191.0071	integron_01	CALIN	2	2	GCF_900517525.1
1252	KLPN.1018.01192.0033	integron_01	complete	3	6	GCF_900493135.1
1253	KLPN.1018.01193.0022	integron_01	complete	1	1	GCF_900514015.1
1254	KLPN.1018.01193.0073	integron_01	CALIN	2	2	GCF_900514015.1
1255	KLPN.1018.01197.0016	integron_01	In0		1	GCF_900508275.1
1256	KLPN.1018.01197.0025	integron_01	CALIN	2	2	GCF_900508275.1
1257	KLPN.1018.01198.0062	integron_01	complete	1	1	GCF_900086415.1
1258	KLPN.1018.01198.0066	integron_01	CALIN	2	2	GCF_900086415.1
1259	KLPN.1018.01200.0045	integron_01	CALIN	2	2	GCF_900502965.1
1260	KLPN.1018.01200.0054	integron_01	complete	1	1	GCF_900502965.1
1261	KLPN.1018.01201.0082	integron_01	complete	3	5	GCF_900502595.1
1262	KLPN.1018.01203.0007	integron_01	complete	1	1	GCF_002775585.1
1263	KLPN.1018.01204.0069	integron_01	CALIN	3	3	GCF_900494095.1
1264	KLPN.1018.01204.0070	integron_01	CALIN	2	3	GCF_900494095.1
1265	KLPN.1018.01204.0075	integron_01	complete	3	5	GCF_900494095.1
1266	KLPN.1018.01205.0030	integron_01	complete	1	1	GCF_900511945.1
1267	KLPN.1018.01205.0085	integron_01	CALIN	2	2	GCF_900511945.1
1268	KLPN.1018.01210.0056	integron_01	complete	1	1	GCF_900513465.1
1269	KLPN.1018.01210.0095	integron_01	CALIN	2	2	GCF_900513465.1
1270	KLPN.1018.01214.0051	integron_01	CALIN	3	1	GCF_003261795.1
1271	KLPN.1018.01214.0057	integron_01	In0		1	GCF_003261795.1
1272	KLPN.1018.01215.0057	integron_01	CALIN	2	4	GCF_900502045.1
1273	KLPN.1018.01216.0056	integron_01	CALIN	3	3	GCF_900503995.1
1274	KLPN.1018.01216.0074	integron_01	CALIN	2	2	GCF_900503995.1
1275	KLPN.1018.01216.0085	integron_01	In0		1	GCF_900503995.1
1276	KLPN.1018.01217.0024	integron_01	complete	3	6	GCF_900494735.1
1277	KLPN.1018.01217.0077	integron_01	CALIN	2	2	GCF_900494735.1
1278	KLPN.1018.01218.0056	integron_01	complete	1	1	GCF_900514055.1
1279	KLPN.1018.01219.0080	integron_01	CALIN	2	2	GCF_900501985.1
1280	KLPN.1018.01219.0084	integron_01	CALIN	2	1	GCF_900501985.1
1281	KLPN.1018.01220.0042	integron_01	complete	1	3	GCF_900517175.1
1282	KLPN.1018.01222.0016	integron_01	complete	1	1	GCF_900517785.1
1283	KLPN.1018.01222.0076	integron_01	CALIN	2	2	GCF_900517785.1
1284	KLPN.1018.01223.0043	integron_01	complete	1	1	GCF_900500995.1
1285	KLPN.1018.01223.0070	integron_01	CALIN	2	2	GCF_900500995.1
1286	KLPN.1018.01226.0044	integron_01	CALIN	4	10	GCF_900507955.1
1287	KLPN.1018.01226.0109	integron_01	CALIN	2	2	GCF_900507955.1
1288	KLPN.1018.01227.0074	integron_01	complete	1	2	GCF_900512155.1
1289	KLPN.1018.01227.0121	integron_01	CALIN	2	2	GCF_900512155.1
1290	KLPN.1018.01229.0151	integron_01	CALIN	2	2	GCF_900172785.1
1291	KLPN.1018.01230.0140	integron_01	CALIN	2	2	GCF_900505215.1
1292	KLPN.1018.01231.0115	integron_01	In0		1	GCF_900502395.1
1293	KLPN.1018.01231.0174	integron_01	CALIN	4	3	GCF_900502395.1
1294	KLPN.1018.01232.0170	integron_01	In0		1	GCF_900504225.1
1295	KLPN.1018.01235.0097	integron_01	complete	1	2	GCF_900508325.1
1296	KLPN.1018.01237.0258	integron_01	In0		1	GCF_900514385.1
1297	KLPN.1018.01238.0181	integron_01	In0		1	GCF_900507855.1
1298	KLPN.1018.01238.0360	integron_01	CALIN	6	7	GCF_900507855.1
1299	KLPN.1018.01243.0009	integron_01	complete	1	3	GCF_001031095.1
1300	KLPN.1018.01243.0028	integron_01	complete	1	2	GCF_001031095.1
1301	KLPN.1018.01243.0033	integron_01	complete	1	2	GCF_001031095.1
1302	KLPN.1018.01245.0022	integron_01	CALIN	2	2	GCF_001033755.1
1303	KLPN.1018.01245.0027	integron_01	complete	4	6	GCF_001033755.1
1304	KLPN.1018.01245.0029	integron_01	complete	1	3	GCF_001033755.1
1305	KLPN.1018.01246.0024	integron_01	complete	2	3	GCF_000787995.1
1306	KLPN.1018.01248.0014	integron_01	complete	2	2	GCF_900517245.1
1307	KLPN.1018.01249.0024	integron_01	complete	3	4	GCF_001033965.1
1308	KLPN.1018.01249.0032	integron_01	CALIN	2	3	GCF_001033965.1
1309	KLPN.1018.01252.0033	integron_01	complete	1	2	GCF_000694615.1
1310	KLPN.1018.01252.0034	integron_01	CALIN	3	3	GCF_000694615.1
1311	KLPN.1018.01253.0030	integron_01	complete	2	1	GCF_002188175.1
1312	KLPN.1018.01253.0032	integron_01	CALIN	2	2	GCF_002188175.1
1313	KLPN.1018.01259.0041	integron_01	complete	3	5	GCF_900515685.1
1314	KLPN.1018.01265.0050	integron_01	complete	4	9	GCF_002152355.1
1315	KLPN.1018.01266.0048	integron_01	CALIN	2	3	GCF_900505025.1
1316	KLPN.1018.01266.0060	integron_01	CALIN	2	2	GCF_900505025.1
1317	KLPN.1018.01268.0041	integron_01	In0		1	GCF_002264435.1
1318	KLPN.1018.01271.0011	integron_01	In0		1	GCF_900513215.1
1319	KLPN.1018.01271.0029	integron_01	CALIN	4	6	GCF_900513215.1
1320	KLPN.1018.01272.0011	integron_01	CALIN	2	2	GCF_900511525.1
1321	KLPN.1018.01273.0018	integron_01	complete	4	6	GCF_900503875.1
1322	KLPN.1018.01275.0002	integron_01	CALIN	2	2	GCF_900084895.1
1323	KLPN.1018.01276.0058	integron_01	complete	1	1	GCF_900513505.1
1324	KLPN.1018.01276.0065	integron_01	CALIN	2	2	GCF_900513505.1
1325	KLPN.1018.01277.0052	integron_01	CALIN	2	3	GCF_900494615.1
1326	KLPN.1018.01277.0054	integron_01	complete	5	9	GCF_900494615.1
1327	KLPN.1018.01277.0066	integron_01	CALIN	3	2	GCF_900494615.1
1328	KLPN.1018.01279.0055	integron_01	complete	1	2	GCF_900507125.1
1329	KLPN.1018.01279.0060	integron_01	CALIN	2	2	GCF_900507125.1
1330	KLPN.1018.01281.0030	integron_01	complete	4	4	GCF_003037795.1
1331	KLPN.1018.01282.0067	integron_01	complete	2	3	GCF_900503285.1
1332	KLPN.1018.01283.0021	integron_01	complete	1	1	GCF_900503155.1
1333	KLPN.1018.01283.0067	integron_01	CALIN	2	2	GCF_900503155.1
1334	KLPN.1018.01285.0026	integron_01	CALIN	2	2	GCF_900505245.1
1335	KLPN.1018.01285.0035	integron_01	CALIN	2	1	GCF_900505245.1
1336	KLPN.1018.01285.0062	integron_01	complete	1	2	GCF_900505245.1
1337	KLPN.1018.01287.0026	integron_01	complete	1	1	GCF_900501145.1
1338	KLPN.1018.01287.0045	integron_01	CALIN	2	2	GCF_900501145.1
1339	KLPN.1018.01288.0015	integron_01	complete	3	4	GCF_900502585.1
1340	KLPN.1018.01288.0018	integron_01	CALIN	5	4	GCF_900502585.1
1341	KLPN.1018.01288.0034	integron_01	CALIN	2	2	GCF_900502585.1
1342	KLPN.1018.01291.0021	integron_01	CALIN	2	2	GCF_900506715.1
1343	KLPN.1018.01291.0045	integron_01	complete	1	2	GCF_900506715.1
1344	KLPN.1018.01293.0033	integron_01	complete	1	2	GCF_900506855.1
1345	KLPN.1018.01293.0051	integron_01	CALIN	2	2	GCF_900506855.1
1346	KLPN.1018.01294.0037	integron_01	complete	3	3	GCF_900507865.1
1347	KLPN.1018.01294.0077	integron_01	CALIN	2	3	GCF_900507865.1
1348	KLPN.1018.01297.0056	integron_01	CALIN	2	2	GCF_900508835.1
1349	KLPN.1018.01297.0075	integron_01	complete	1	2	GCF_900508835.1
1350	KLPN.1018.01298.0025	integron_01	complete	1	2	GCF_900503405.1
1351	KLPN.1018.01298.0045	integron_01	CALIN	4	11	GCF_900503405.1
1352	KLPN.1018.01298.0074	integron_01	CALIN	2	1	GCF_900503405.1
1353	KLPN.1018.01299.0072	integron_01	CALIN	4	11	GCF_900505625.1
1354	KLPN.1018.01300.0066	integron_01	complete	1	1	GCF_900492955.1
1355	KLPN.1018.01300.0075	integron_01	CALIN	2	3	GCF_900492955.1
1356	KLPN.1018.01301.0041	integron_01	CALIN	2	2	GCF_002866605.1
1357	KLPN.1018.01301.0048	integron_01	In0		1	GCF_002866605.1
1358	KLPN.1018.01304.0042	integron_01	CALIN	2	3	GCF_900494745.1
1359	KLPN.1018.01304.0050	integron_01	CALIN	4	10	GCF_900494745.1
1360	KLPN.1018.01304.0073	integron_01	complete	3	3	GCF_900494745.1
1361	KLPN.1018.01304.0082	integron_01	CALIN	4	2	GCF_900494745.1
1362	KLPN.1018.01305.0022	integron_01	CALIN	2	2	GCF_900514665.1
1363	KLPN.1018.01305.0076	integron_01	complete	1	2	GCF_900514665.1
1364	KLPN.1018.01306.0071	integron_01	complete	1	1	GCF_900511815.1
1365	KLPN.1018.01307.0084	integron_01	CALIN	2	3	GCF_900516875.1
1366	KLPN.1018.01308.0055	integron_01	complete	1	1	GCF_002854935.1
1367	KLPN.1018.01308.0059	integron_01	CALIN	2	2	GCF_002854935.1
1368	KLPN.1018.01310.0085	integron_01	CALIN	2		GCF_900514205.1
1369	KLPN.1018.01311.0040	integron_01	complete	1	1	GCF_900513665.1
1370	KLPN.1018.01311.0088	integron_01	CALIN	2	3	GCF_900513665.1
1371	KLPN.1018.01312.0036	integron_01	CALIN	2	2	GCF_900507215.1
1372	KLPN.1018.01313.0019	integron_01	CALIN	2	2	GCF_900517065.1
1373	KLPN.1018.01315.0050	integron_01	CALIN	2	2	GCF_900513285.1
1374	KLPN.1018.01315.0072	integron_01	complete	1	1	GCF_900513285.1
1375	KLPN.1018.01317.0018	integron_01	In0		1	GCF_900513965.1
1376	KLPN.1018.01317.0092	integron_01	CALIN	4	4	GCF_900513965.1
1377	KLPN.1018.01318.0030	integron_01	complete	3	3	GCF_900507875.1
1378	KLPN.1018.01318.0080	integron_01	CALIN	2	2	GCF_900507875.1
1379	KLPN.1018.01320.0023	integron_01	CALIN	3	2	GCF_900493875.1
1380	KLPN.1018.01320.0073	integron_01	complete	3	6	GCF_900493875.1
1381	KLPN.1018.01321.0024	integron_01	CALIN	2	3	GCF_900504965.1
1382	KLPN.1018.01321.0088	integron_01	CALIN	2	1	GCF_900504965.1
1383	KLPN.1018.01322.0041	integron_01	complete	3	4	GCF_900494315.1
1384	KLPN.1018.01322.0093	integron_01	CALIN	4	3	GCF_900494315.1
1385	KLPN.1018.01323.0010	integron_01	complete	1	2	GCF_900517695.1
1386	KLPN.1018.01323.0018	integron_01	CALIN	2	2	GCF_900517695.1
1387	KLPN.1018.01325.0036	integron_01	CALIN	6	8	GCF_900493055.1
1388	KLPN.1018.01328.0012	integron_01	CALIN	2	3	GCF_002775235.1
1389	KLPN.1018.01328.0016	integron_01	complete	1	1	GCF_002775235.1
1390	KLPN.1018.01329.0012	integron_01	complete	1	1	GCF_900407155.1
1391	KLPN.1018.01329.0037	integron_01	CALIN	2	3	GCF_900407155.1
1392	KLPN.1018.01330.0017	integron_01	CALIN	4	4	GCF_002775405.1
1393	KLPN.1018.01330.0023	integron_01	CALIN	4	11	GCF_002775405.1
1394	KLPN.1018.01330.0052	integron_01	CALIN	3	2	GCF_002775405.1
1395	KLPN.1018.01330.0058	integron_01	In0		1	GCF_002775405.1
1396	KLPN.1018.01331.0034	integron_01	complete	1	1	GCF_003226945.1
1397	KLPN.1018.01331.0067	integron_01	CALIN	2	3	GCF_003226945.1
1398	KLPN.1018.01332.0046	integron_01	CALIN	2	2	GCF_900511065.1
1399	KLPN.1018.01333.0083	integron_01	CALIN	2	1	GCF_900517315.1
1400	KLPN.1018.01334.0079	integron_01	CALIN	5	4	GCF_900501725.1
1401	KLPN.1018.01334.0103	integron_01	CALIN	2	2	GCF_900501725.1
1402	KLPN.1018.01334.0109	integron_01	In0		1	GCF_900501725.1
1403	KLPN.1018.01336.0052	integron_01	complete	1	1	GCF_002164725.1
1404	KLPN.1018.01336.0073	integron_01	CALIN	2	3	GCF_002164725.1
1405	KLPN.1018.01337.0044	integron_01	complete	1	3	GCF_900407135.1
1406	KLPN.1018.01338.0144	integron_01	complete	6	8	GCF_900516225.1
1407	KLPN.1018.01339.0043	integron_01	CALIN	2	1	GCF_900407215.1
1408	KLPN.1018.01339.0067	integron_01	In0		1	GCF_900407215.1
1409	KLPN.1018.01339.0107	integron_01	CALIN	2	2	GCF_900407215.1
1410	KLPN.1018.01340.0071	integron_01	CALIN	4	5	GCF_900515135.1
1411	KLPN.1018.01342.0122	integron_01	complete	1	1	GCF_900516215.1
1412	KLPN.1018.01343.0238	integron_01	CALIN	2	2	GCF_900173375.1
1413	KLPN.1018.01345.0057	integron_01	In0		1	GCF_900503275.1
1414	KLPN.1018.01346.0250	integron_01	complete	3	4	GCF_900494755.1
1415	KLPN.1018.01347.0174	integron_01	complete	3	4	GCF_900494195.1
1416	KLPN.1018.01349.0228	integron_01	complete	3	4	GCF_900516485.1
1417	KLPN.1018.01350.0071	integron_01	CALIN	2	2	GCF_900509045.1
1418	KLPN.1018.01351.0278	integron_01	CALIN	3	2	GCF_900507415.1
1419	KLPN.1018.01356.0035	integron_01	CALIN	2	4	GCF_001032075.1
1420	KLPN.1018.01357.0030	integron_01	complete	3	4	GCF_003346645.1
1421	KLPN.1018.01361.0001	integron_01	complete	3	3	GCF_001441285.1
1422	KLPN.1018.01362.0006	integron_01	complete	3	4	GCF_900084265.1
1423	KLPN.1018.01362.0009	integron_01	CALIN	3	5	GCF_900084265.1
1424	KLPN.1018.01366.0003	integron_01	CALIN	2	2	GCF_900084525.1
1425	KLPN.1018.01366.0055	integron_01	complete	3	4	GCF_900084525.1
1426	KLPN.1018.01367.0026	integron_01	complete	1	1	GCF_002186855.1
1427	KLPN.1018.01368.0038	integron_01	complete	1	1	GCF_002854915.1
1428	KLPN.1018.01368.0048	integron_01	CALIN	2	2	GCF_002854915.1
1429	KLPN.1018.01370.0022	integron_01	complete	1	1	GCF_002186835.1
1430	KLPN.1018.01372.0041	integron_01	complete	1	2	GCF_900511045.1
1431	KLPN.1018.01372.0051	integron_01	CALIN	2	2	GCF_900511045.1
1432	KLPN.1018.01373.0018	integron_01	CALIN	3	1	GCF_002851435.1
1433	KLPN.1018.01373.0037	integron_01	CALIN	5	3	GCF_002851435.1
1434	KLPN.1018.01373.0042	integron_01	In0		1	GCF_002851435.1
1435	KLPN.1018.01374.0046	integron_01	CALIN	4	11	GCF_900506705.1
1436	KLPN.1018.01375.0043	integron_01	complete	1	3	GCF_900510475.1
1437	KLPN.1018.01376.0026	integron_01	complete	1	1	GCF_900515825.1
1438	KLPN.1018.01376.0053	integron_01	CALIN	4	6	GCF_900515825.1
1439	KLPN.1018.01377.0045	integron_01	complete	3	4	GCF_900493405.1
1440	KLPN.1018.01377.0046	integron_01	CALIN	2	3	GCF_900493405.1
1441	KLPN.1018.01378.0012	integron_01	CALIN	2	2	GCF_900511305.1
1442	KLPN.1018.01378.0054	integron_01	CALIN	2	2	GCF_900511305.1
1443	KLPN.1018.01378.0060	integron_01	In0		1	GCF_900511305.1
1444	KLPN.1018.01380.0027	integron_01	complete	1	3	GCF_002249125.1
1445	KLPN.1018.01380.0039	integron_01	CALIN	4	3	GCF_002249125.1
1446	KLPN.1018.01380.0043	integron_01	CALIN	2	1	GCF_002249125.1
1447	KLPN.1018.01383.0023	integron_01	complete	1	2	GCF_002854715.1
1448	KLPN.1018.01383.0035	integron_01	CALIN	2	2	GCF_002854715.1
1449	KLPN.1018.01384.0012	integron_01	complete	1	3	GCF_900513055.1
1450	KLPN.1018.01385.0051	integron_01	complete	4	6	GCF_900508475.1
1451	KLPN.1018.01386.0036	integron_01	CALIN	3	7	GCF_900085405.1
1452	KLPN.1018.01386.0049	integron_01	CALIN	2	3	GCF_900085405.1
1453	KLPN.1018.01386.0051	integron_01	CALIN	2	2	GCF_900085405.1
1454	KLPN.1018.01386.0055	integron_01	In0		1	GCF_900085405.1
1455	KLPN.1018.01387.0061	integron_01	complete	3	4	GCF_900511015.1
1456	KLPN.1018.01387.0064	integron_01	CALIN	2	2	GCF_900511015.1
1457	KLPN.1018.01391.0041	integron_01	complete	2	4	GCF_900517815.1
1458	KLPN.1018.01391.0066	integron_01	CALIN	2	2	GCF_900517815.1
1459	KLPN.1018.01392.0040	integron_01	complete	3	6	GCF_900494535.1
1460	KLPN.1018.01393.0044	integron_01	complete	1	1	GCF_002751475.1
1461	KLPN.1018.01393.0053	integron_01	CALIN	2	2	GCF_002751475.1
1462	KLPN.1018.01394.0048	integron_01	CALIN	2	3	GCF_900504935.1
1463	KLPN.1018.01394.0066	integron_01	CALIN	2	3	GCF_900504935.1
1464	KLPN.1018.01395.0034	integron_01	complete	1	2	GCF_900505085.1
1465	KLPN.1018.01395.0059	integron_01	CALIN	2	4	GCF_900505085.1
1466	KLPN.1018.01397.0016	integron_01	complete	2	4	GCF_900493675.1
1467	KLPN.1018.01398.0059	integron_01	complete	1	3	GCF_900504925.1
1468	KLPN.1018.01400.0057	integron_01	complete	3	4	GCF_900508675.1
1469	KLPN.1018.01403.0070	integron_01	CALIN	2	3	GCF_900501745.1
1470	KLPN.1018.01404.0018	integron_01	complete	1	1	GCF_900513845.1
1471	KLPN.1018.01404.0046	integron_01	CALIN	2	2	GCF_900513845.1
1472	KLPN.1018.01405.0005	integron_01	complete	1	1	GCF_001702405.1
1473	KLPN.1018.01405.0050	integron_01	CALIN	2	3	GCF_001702405.1
1474	KLPN.1018.01407.0031	integron_01	CALIN	3	3	GCF_002258105.1
1475	KLPN.1018.01407.0045	integron_01	CALIN	2	2	GCF_002258105.1
1476	KLPN.1018.01407.0052	integron_01	In0		1	GCF_002258105.1
1477	KLPN.1018.01408.0033	integron_01	In0		1	GCF_900504725.1
1478	KLPN.1018.01409.0065	integron_01	CALIN	2	3	GCF_900516395.1
1479	KLPN.1018.01410.0015	integron_01	CALIN	2	1	GCF_900511535.1
1480	KLPN.1018.01410.0020	integron_01	CALIN	2	1	GCF_900511535.1
1481	KLPN.1018.01410.0024	integron_01	CALIN	5	3	GCF_900511535.1
1482	KLPN.1018.01410.0027	integron_01	In0		1	GCF_900511535.1
1483	KLPN.1018.01411.0069	integron_01	CALIN	2	2	GCF_900506455.1
1484	KLPN.1018.01411.0074	integron_01	complete	1	1	GCF_900506455.1
1485	KLPN.1018.01414.0024	integron_01	CALIN	2	2	GCF_900516955.1
1486	KLPN.1018.01415.0054	integron_01	CALIN	3	3	GCF_900505495.1
1487	KLPN.1018.01416.0025	integron_01	CALIN	2	2	GCF_900503015.1
1488	KLPN.1018.01416.0065	integron_01	complete	2	4	GCF_900503015.1
1489	KLPN.1018.01421.0024	integron_01	CALIN	5	4	GCF_900504085.1
1490	KLPN.1018.01424.0061	integron_01	CALIN	4	10	GCF_900507165.1
1491	KLPN.1018.01424.0070	integron_01	complete	1	2	GCF_900507165.1
1492	KLPN.1018.01424.0083	integron_01	CALIN	2	1	GCF_900507165.1
1493	KLPN.1018.01426.0053	integron_01	complete	1	1	GCF_900511885.1
1494	KLPN.1018.01426.0084	integron_01	CALIN	2	2	GCF_900511885.1
1495	KLPN.1018.01427.0023	integron_01	CALIN	2	2	GCF_900503965.1
1496	KLPN.1018.01427.0030	integron_01	complete	1	3	GCF_900503965.1
1497	KLPN.1018.01428.0051	integron_01	complete	1	1	GCF_900515465.1
1498	KLPN.1018.01428.0084	integron_01	CALIN	2	2	GCF_900515465.1
1499	KLPN.1018.01429.0035	integron_01	complete	4	6	GCF_900511765.1
1500	KLPN.1018.01430.0019	integron_01	complete	4	9	GCF_002776395.1
1501	KLPN.1018.01432.0029	integron_01	complete	1	2	GCF_900505665.1
1502	KLPN.1018.01432.0058	integron_01	CALIN	2	2	GCF_900505665.1
1503	KLPN.1018.01435.0076	integron_01	CALIN	2	2	GCF_900513225.1
1504	KLPN.1018.01435.0088	integron_01	complete	1	1	GCF_900513225.1
1505	KLPN.1018.01436.0083	integron_01	complete	1	2	GCF_900507885.1
1506	KLPN.1018.01437.0084	integron_01	complete	1	1	GCF_900511725.1
1507	KLPN.1018.01439.0014	integron_01	complete	1	2	GCF_002775315.1
1508	KLPN.1018.01440.0079	integron_01	complete	1	1	GCF_900503055.1
1509	KLPN.1018.01440.0091	integron_01	CALIN	2	2	GCF_900503055.1
1510	KLPN.1018.01441.0072	integron_01	complete	3	4	GCF_900175095.1
1511	KLPN.1018.01442.0041	integron_01	complete	1	1	GCF_001566595.1
1512	KLPN.1018.01442.0058	integron_01	CALIN	2	2	GCF_001566595.1
1513	KLPN.1018.01443.0023	integron_01	CALIN	2	2	GCF_900506815.1
1514	KLPN.1018.01443.0024	integron_01	In0		1	GCF_900506815.1
1515	KLPN.1018.01443.0067	integron_01	CALIN	2	2	GCF_900506815.1
1516	KLPN.1018.01444.0037	integron_01	CALIN	2	3	GCF_003069585.1
1517	KLPN.1018.01446.0028	integron_01	complete	1	1	GCF_900172575.1
1518	KLPN.1018.01446.0099	integron_01	CALIN	2	2	GCF_900172575.1
1519	KLPN.1018.01448.0014	integron_01	CALIN	3	4	GCF_900507565.1
1520	KLPN.1018.01448.0051	integron_01	CALIN	2	4	GCF_900507565.1
1521	KLPN.1018.01448.0084	integron_01	In0		1	GCF_900507565.1
1522	KLPN.1018.01449.0008	integron_01	complete	1	1	GCF_900514785.1
1523	KLPN.1018.01449.0013	integron_01	CALIN	2	2	GCF_900514785.1
1524	KLPN.1018.01450.0016	integron_01	CALIN	2	2	GCF_900516755.1
1525	KLPN.1018.01450.0039	integron_01	CALIN	2	2	GCF_900516755.1
1526	KLPN.1018.01451.0009	integron_01	complete	3	4	GCF_900494015.1
1527	KLPN.1018.01451.0012	integron_01	CALIN	2	3	GCF_900494015.1
1528	KLPN.1018.01453.0038	integron_01	CALIN	4	4	GCF_900502295.1
1529	KLPN.1018.01453.0066	integron_01	CALIN	2	2	GCF_900502295.1
1530	KLPN.1018.01453.0067	integron_01	CALIN	4	2	GCF_900502295.1
1531	KLPN.1018.01454.0076	integron_01	complete	1	3	GCF_900513015.1
1532	KLPN.1018.01455.0044	integron_01	complete	3	4	GCF_001647455.1
1533	KLPN.1018.01455.0069	integron_01	CALIN	2	2	GCF_001647455.1
1534	KLPN.1018.01455.0079	integron_01	CALIN	3	6	GCF_001647455.1
1535	KLPN.1018.01456.0030	integron_01	CALIN	3	3	GCF_900494595.1
1536	KLPN.1018.01456.0035	integron_01	CALIN	2	2	GCF_900494595.1
1537	KLPN.1018.01456.0045	integron_01	In0		1	GCF_900494595.1
1538	KLPN.1018.01458.0063	integron_01	CALIN	2	2	GCF_900507485.1
1539	KLPN.1018.01459.0121	integron_01	CALIN	2	1	GCF_900172725.1
1540	KLPN.1018.01460.0079	integron_01	CALIN	2	2	GCF_002166915.1
1541	KLPN.1018.01460.0092	integron_01	In0		1	GCF_002166915.1
1542	KLPN.1018.01462.0040	integron_01	complete	1	1	GCF_900513255.1
1543	KLPN.1018.01462.0091	integron_01	CALIN	2	2	GCF_900513255.1
1544	KLPN.1018.01465.0095	integron_01	In0		1	GCF_001463555.1
1545	KLPN.1018.01465.0115	integron_01	CALIN	5	3	GCF_001463555.1
1546	KLPN.1018.01467.0046	integron_01	complete	1	3	GCF_900407315.1
1547	KLPN.1018.01468.0079	integron_01	complete	1	1	GCF_900504155.1
1548	KLPN.1018.01471.0036	integron_01	CALIN	5	4	GCF_900503465.1
1549	KLPN.1018.01471.0131	integron_01	CALIN	2	1	GCF_900503465.1
1550	KLPN.1018.01471.0141	integron_01	In0		1	GCF_900503465.1
1551	KLPN.1018.01472.0055	integron_01	complete	1	2	GCF_900502945.1
1552	KLPN.1018.01472.0117	integron_01	CALIN	2	2	GCF_900502945.1
1553	KLPN.1018.01473.0079	integron_01	complete	1	2	GCF_900507575.1
1554	KLPN.1018.01473.0087	integron_01	CALIN	4	11	GCF_900507575.1
1555	KLPN.1018.01473.0105	integron_01	CALIN	2	2	GCF_900507575.1
1556	KLPN.1018.01476.0204	integron_01	complete	1	3	GCF_900503845.1
1557	KLPN.1018.01476.0270	integron_01	CALIN	3	1	GCF_900503845.1
1558	KLPN.1018.01477.0114	integron_01	complete	1	2	GCF_900506135.1
1559	KLPN.1018.01477.0236	integron_01	CALIN	2	2	GCF_900506135.1
1560	KLPN.1018.01478.0093	integron_01	complete	7	8	GCF_900505735.1
1561	KLPN.1018.01480.0292	integron_01	CALIN	2	2	GCF_900516245.1
1562	KLPN.1018.01481.0006	integron_01	complete	1	3	GCF_001031945.1
1563	KLPN.1018.01482.0005	integron_01	CALIN	3	5	GCF_001968745.2
1564	KLPN.1018.01482.0007	integron_01	complete	2	4	GCF_001968745.2
1565	KLPN.1018.01486.0024	integron_01	CALIN	5	7	GCF_000694535.1
1566	KLPN.1018.01486.0025	integron_01	CALIN	2	2	GCF_000694535.1
1567	KLPN.1018.01493.0024	integron_01	complete	3	4	GCF_002851215.1
1568	KLPN.1018.01494.0003	integron_01	CALIN	2	3	GCF_001968755.2
1569	KLPN.1018.01494.0029	integron_01	complete	2	4	GCF_001968755.2
1570	KLPN.1018.01495.0044	integron_01	CALIN	2	2	GCF_900092905.1
1571	KLPN.1018.01495.0051	integron_01	CALIN	3	3	GCF_900092905.1
1572	KLPN.1018.01495.0052	integron_01	In0		1	GCF_900092905.1
1573	KLPN.1018.01496.0006	integron_01	CALIN	2	2	GCF_002851195.1
1574	KLPN.1018.01497.0031	integron_01	CALIN	2	1	GCF_001701695.1
1575	KLPN.1018.01499.0039	integron_01	CALIN	2	1	GCF_001701725.1
1576	KLPN.1018.01500.0018	integron_01	CALIN	2	3	GCF_001647465.1
1577	KLPN.1018.01500.0059	integron_01	complete	1	1	GCF_001647465.1
1578	KLPN.1018.01501.0042	integron_01	complete	3	4	GCF_900507695.1
1579	KLPN.1018.01501.0054	integron_01	CALIN	2	2	GCF_900507695.1
1580	KLPN.1018.01503.0027	integron_01	complete	3	4	GCF_003346675.1
1581	KLPN.1018.01505.0045	integron_01	CALIN	2	3	GCF_900516925.1
1582	KLPN.1018.01506.0029	integron_01	complete	1	1	GCF_002187975.1
1583	KLPN.1018.01506.0039	integron_01	CALIN	2	2	GCF_002187975.1
1584	KLPN.1018.01507.0007	integron_01	complete	3	5	GCF_000826795.1
1585	KLPN.1018.01508.0029	integron_01	complete	3	4	GCF_002187475.1
1586	KLPN.1018.01509.0017	integron_01	CALIN	2	5	GCF_003346575.1
1587	KLPN.1018.01509.0039	integron_01	complete	1	1	GCF_003346575.1
1588	KLPN.1018.01509.0053	integron_01	CALIN	2	2	GCF_003346575.1
1589	KLPN.1018.01511.0038	integron_01	complete	1	1	GCF_900513545.1
1590	KLPN.1018.01511.0063	integron_01	CALIN	2	2	GCF_900513545.1
1591	KLPN.1018.01512.0029	integron_01	complete	1	1	GCF_002186435.1
1592	KLPN.1018.01513.0035	integron_01	complete	1	1	GCF_000943155.1
1593	KLPN.1018.01513.0045	integron_01	CALIN	2	3	GCF_000943155.1
1594	KLPN.1018.01514.0051	integron_01	CALIN	2	2	GCF_900502525.1
1595	KLPN.1018.01514.0057	integron_01	CALIN	2	2	GCF_900502525.1
1596	KLPN.1018.01515.0025	integron_01	In0		1	GCF_002854285.1
1597	KLPN.1018.01515.0039	integron_01	CALIN	4	5	GCF_002854285.1
1598	KLPN.1018.01516.0045	integron_01	complete	1	1	GCF_002751525.1
1599	KLPN.1018.01516.0051	integron_01	CALIN	2	3	GCF_002751525.1
1600	KLPN.1018.01517.0059	integron_01	complete	1	3	GCF_900172945.1
1601	KLPN.1018.01519.0039	integron_01	CALIN	2	3	GCF_900510635.1
1602	KLPN.1018.01519.0059	integron_01	complete	1	1	GCF_900510635.1
1603	KLPN.1018.01520.0024	integron_01	complete	1	1	GCF_900503085.1
1604	KLPN.1018.01520.0035	integron_01	CALIN	2	2	GCF_900503085.1
1605	KLPN.1018.01523.0012	integron_01	CALIN	2	1	GCF_900511355.1
1606	KLPN.1018.01523.0066	integron_01	complete	3	5	GCF_900511355.1
1607	KLPN.1018.01525.0018	integron_01	complete	1	1	GCF_900513795.1
1608	KLPN.1018.01528.0064	integron_01	complete	1	3	GCF_900506005.1
1609	KLPN.1018.01529.0018	integron_01	CALIN	2	1	GCF_900508575.1
1610	KLPN.1018.01529.0060	integron_01	complete	1	2	GCF_900508575.1
1611	KLPN.1018.01529.0072	integron_01	CALIN	2	3	GCF_900508575.1
1612	KLPN.1018.01531.0007	integron_01	complete	1	3	GCF_001720815.1
1613	KLPN.1018.01531.0050	integron_01	CALIN	2	2	GCF_001720815.1
1614	KLPN.1018.01532.0062	integron_01	CALIN	2	3	GCF_900502705.1
1615	KLPN.1018.01533.0067	integron_01	complete	1	1	GCF_900503585.1
1616	KLPN.1018.01534.0030	integron_01	CALIN	2	3	GCF_001462965.1
1617	KLPN.1018.01535.0026	integron_01	complete	1	2	GCF_002187455.1
1618	KLPN.1018.01538.0021	integron_01	complete	2	4	GCF_900291505.1
1619	KLPN.1018.01539.0020	integron_01	CALIN	2	2	GCF_900505855.1
1620	KLPN.1018.01539.0056	integron_01	complete	1	1	GCF_900505855.1
1621	KLPN.1018.01540.0043	integron_01	complete	1	1	GCF_900512415.1
1622	KLPN.1018.01540.0058	integron_01	CALIN	4	11	GCF_900512415.1
1623	KLPN.1018.01540.0075	integron_01	CALIN	2	1	GCF_900512415.1
1624	KLPN.1018.01541.0019	integron_01	CALIN	2	3	GCF_900513495.1
1625	KLPN.1018.01541.0072	integron_01	complete	1	1	GCF_900513495.1
1626	KLPN.1018.01542.0047	integron_01	complete	6	7	GCF_900504785.1
1627	KLPN.1018.01542.0078	integron_01	CALIN	2	1	GCF_900504785.1
1628	KLPN.1018.01543.0071	integron_01	complete	1	2	GCF_900504515.1
1629	KLPN.1018.01544.0030	integron_01	CALIN	2	3	GCF_003571025.1
1630	KLPN.1018.01545.0061	integron_01	CALIN	2	3	GCF_900503605.1
1631	KLPN.1018.01545.0076	integron_01	CALIN	2	2	GCF_900503605.1
1632	KLPN.1018.01546.0074	integron_01	complete	3	6	GCF_900512575.1
1633	KLPN.1018.01547.0023	integron_01	CALIN	2	2	GCF_900512495.1
1634	KLPN.1018.01547.0081	integron_01	complete	1	2	GCF_900512495.1
1635	KLPN.1018.01548.0030	integron_01	complete	4	6	GCF_900511025.1
1636	KLPN.1018.01549.0067	integron_01	CALIN	2	4	GCF_900502685.1
1637	KLPN.1018.01550.0064	integron_01	CALIN	2	2	GCF_900516715.1
1638	KLPN.1018.01550.0087	integron_01	CALIN	2	2	GCF_900516715.1
1639	KLPN.1018.01551.0031	integron_01	complete	2	3	GCF_003382195.1
1640	KLPN.1018.01552.0030	integron_01	CALIN	2	2	GCF_900507385.1
1641	KLPN.1018.01552.0033	integron_01	complete	1	1	GCF_900507385.1
1642	KLPN.1018.01553.0056	integron_01	complete	1	2	GCF_900506935.1
1643	KLPN.1018.01554.0047	integron_01	CALIN	2	3	GCF_002186585.1
1644	KLPN.1018.01554.0061	integron_01	In0		1	GCF_002186585.1
1645	KLPN.1018.01555.0028	integron_01	CALIN	2	2	GCF_900506295.1
1646	KLPN.1018.01556.0019	integron_01	CALIN	2	2	GCF_900516325.1
1647	KLPN.1018.01556.0030	integron_01	CALIN	2	2	GCF_900516325.1
1648	KLPN.1018.01557.0017	integron_01	In0		1	GCF_900512795.1
1649	KLPN.1018.01557.0027	integron_01	CALIN	2	1	GCF_900512795.1
1650	KLPN.1018.01557.0084	integron_01	CALIN	2	4	GCF_900512795.1
1651	KLPN.1018.01557.0088	integron_01	CALIN	3	4	GCF_900512795.1
1652	KLPN.1018.01559.0049	integron_01	CALIN	4	11	GCF_002093155.1
1653	KLPN.1018.01559.0055	integron_01	complete	1	2	GCF_002093155.1
1654	KLPN.1018.01559.0063	integron_01	CALIN	2	3	GCF_002093155.1
1655	KLPN.1018.01562.0080	integron_01	complete	3	5	GCF_900494345.1
1656	KLPN.1018.01562.0081	integron_01	In0		1	GCF_900494345.1
1657	KLPN.1018.01563.0026	integron_01	CALIN	2	2	GCF_900510535.1
1658	KLPN.1018.01563.0046	integron_01	complete	1	1	GCF_900510535.1
1659	KLPN.1018.01564.0032	integron_01	complete	1	1	GCF_001316845.2
1660	KLPN.1018.01564.0048	integron_01	CALIN	2	3	GCF_001316845.2
1661	KLPN.1018.01565.0083	integron_01	complete	1	1	GCF_900516645.1
1662	KLPN.1018.01565.0095	integron_01	CALIN	2	2	GCF_900516645.1
1663	KLPN.1018.01568.0038	integron_01	complete	4	5	GCF_002991945.1
1664	KLPN.1018.01569.0038	integron_01	CALIN	3	3	GCF_002851055.1
1665	KLPN.1018.01569.0060	integron_01	In0		1	GCF_002851055.1
1666	KLPN.1018.01569.0069	integron_01	CALIN	2	2	GCF_002851055.1
1667	KLPN.1018.01570.0018	integron_01	complete	4	6	GCF_900502235.1
1668	KLPN.1018.01571.0030	integron_01	complete	1	4	GCF_001984895.1
1669	KLPN.1018.01571.0047	integron_01	CALIN	2	2	GCF_001984895.1
1670	KLPN.1018.01572.0065	integron_01	CALIN	2	2	GCF_900508765.1
1671	KLPN.1018.01572.0082	integron_01	CALIN	2	2	GCF_900508765.1
1672	KLPN.1018.01573.0078	integron_01	In0		1	GCF_900505815.1
1673	KLPN.1018.01574.0028	integron_01	CALIN	4	4	GCF_900508805.1
1674	KLPN.1018.01574.0072	integron_01	CALIN	3	1	GCF_900508805.1
1675	KLPN.1018.01574.0075	integron_01	In0		1	GCF_900508805.1
1676	KLPN.1018.01574.0096	integron_01	CALIN	2	2	GCF_900508805.1
1677	KLPN.1018.01575.0010	integron_01	complete	1	2	GCF_900503395.1
1678	KLPN.1018.01575.0019	integron_01	CALIN	2	4	GCF_900503395.1
1679	KLPN.1018.01575.0062	integron_01	CALIN	2	1	GCF_900503395.1
1680	KLPN.1018.01576.0024	integron_01	complete	1	2	GCF_900509195.1
1681	KLPN.1018.01576.0071	integron_01	CALIN	2	3	GCF_900509195.1
1682	KLPN.1018.01579.0048	integron_01	CALIN	2	2	GCF_900507315.1
1683	KLPN.1018.01579.0093	integron_01	complete	3	4	GCF_900507315.1
1684	KLPN.1018.01580.0038	integron_01	CALIN	2	3	GCF_002246705.1
1685	KLPN.1018.01580.0042	integron_01	complete	1	2	GCF_002246705.1
1686	KLPN.1018.01581.0018	integron_01	CALIN	4	11	GCF_900503345.1
1687	KLPN.1018.01582.0018	integron_01	complete	1	2	GCF_900505335.1
1688	KLPN.1018.01582.0065	integron_01	CALIN	2	2	GCF_900505335.1
1689	KLPN.1018.01582.0070	integron_01	CALIN	2	1	GCF_900505335.1
1690	KLPN.1018.01583.0046	integron_01	complete	1	2	GCF_003583185.1
1691	KLPN.1018.01583.0054	integron_01	CALIN	2	3	GCF_003583185.1
1692	KLPN.1018.01584.0022	integron_01	CALIN	2	3	GCF_900516075.1
1693	KLPN.1018.01584.0047	integron_01	complete	1	3	GCF_900516075.1
1694	KLPN.1018.01585.0074	integron_01	CALIN	3	2	GCF_900504055.1
1695	KLPN.1018.01585.0077	integron_01	CALIN	2	2	GCF_900504055.1
1696	KLPN.1018.01587.0022	integron_01	complete	1	2	GCF_900507455.1
1697	KLPN.1018.01587.0109	integron_01	CALIN	2	3	GCF_900507455.1
1698	KLPN.1018.01591.0026	integron_01	CALIN	3	4	GCF_900504855.1
1699	KLPN.1018.01591.0129	integron_01	In0		1	GCF_900504855.1
1700	KLPN.1018.01592.0024	integron_01	complete	1	2	GCF_900506805.1
1701	KLPN.1018.01594.0035	integron_01	complete	1	2	GCF_900407185.1
1702	KLPN.1018.01594.0096	integron_01	CALIN	2	3	GCF_900407185.1
1703	KLPN.1018.01595.0059	integron_01	complete	1	1	GCF_900493215.1
1704	KLPN.1018.01597.0038	integron_01	CALIN	2	2	GCF_900516145.1
1705	KLPN.1018.01597.0071	integron_01	complete	1	1	GCF_900516145.1
1706	KLPN.1018.01598.0057	integron_01	CALIN	3	6	GCF_900503525.1
1707	KLPN.1018.01600.0035	integron_01	complete	1	3	GCF_002262175.1
1708	KLPN.1018.01601.0075	integron_01	complete	1	2	GCF_900503475.1
1709	KLPN.1018.01601.0088	integron_01	CALIN	4	11	GCF_900503475.1
1710	KLPN.1018.01601.0139	integron_01	CALIN	2	1	GCF_900503475.1
1711	KLPN.1018.01602.0178	integron_01	CALIN	2	1	GCF_900172705.1
1712	KLPN.1018.01603.0162	integron_01	complete	1	4	GCF_003311785.1
1713	KLPN.1018.01603.0172	integron_01	CALIN	2	4	GCF_003311785.1
1714	KLPN.1018.01603.0204	integron_01	CALIN	2	2	GCF_003311785.1
1715	KLPN.1018.01604.0134	integron_01	CALIN	2	1	GCF_900172645.1
1716	KLPN.1018.01606.0251	integron_01	complete	1	2	GCF_900504655.1
1717	KLPN.1018.01607.0141	integron_01	CALIN	2	2	GCF_900501135.1
1718	KLPN.1018.01607.0161	integron_01	complete	1	1	GCF_900501135.1
1719	KLPN.1018.01608.0261	integron_01	CALIN	5	4	GCF_900504255.1
1720	KLPN.1018.01609.0173	integron_01	complete	1	3	GCF_900517275.1
1721	KLPN.1018.01609.0247	integron_01	CALIN	2	1	GCF_900517275.1
1722	KLPN.1018.01610.0248	integron_01	complete	1	2	GCF_900503245.1
1723	KLPN.1018.01610.0506	integron_01	CALIN	3	2	GCF_900503245.1
1724	KLPN.1018.01614.0009	integron_01	complete	1	3	GCF_000567785.1
1725	KLPN.1018.01614.0032	integron_01	complete	6	8	GCF_000567785.1
1726	KLPN.1018.01615.0009	integron_01	CALIN	2	3	GCF_002108275.1
1727	KLPN.1018.01615.0013	integron_01	complete	1	1	GCF_002108275.1
1728	KLPN.1018.01617.0039	integron_01	complete	3	4	GCF_900085005.1
1729	KLPN.1018.01617.0052	integron_01	CALIN	2	2	GCF_900085005.1
1730	KLPN.1018.01618.0038	integron_01	CALIN	3	2	GCF_002854855.1
1731	KLPN.1018.01621.0038	integron_01	CALIN	4	4	GCF_001549995.1
1732	KLPN.1018.01625.0032	integron_01	complete	1	2	GCF_002187395.1
1733	KLPN.1018.01625.0039	integron_01	CALIN	2	2	GCF_002187395.1
1734	KLPN.1018.01626.0033	integron_01	complete	3	4	GCF_900508465.1
1735	KLPN.1018.01627.0016	integron_01	CALIN	2	1	GCF_900502635.1
1736	KLPN.1018.01627.0062	integron_01	complete	1	2	GCF_900502635.1
1737	KLPN.1018.01628.0017	integron_01	complete	3	4	GCF_900503125.1
1738	KLPN.1018.01631.0040	integron_01	CALIN	2	2	GCF_900506445.1
1739	KLPN.1018.01631.0057	integron_01	complete	2	3	GCF_900506445.1
1740	KLPN.1018.01632.0041	integron_01	CALIN	2	3	GCF_900494365.1
1741	KLPN.1018.01632.0058	integron_01	complete	3	4	GCF_900494365.1
1742	KLPN.1018.01634.0048	integron_01	complete	1	1	GCF_002751605.1
1743	KLPN.1018.01634.0054	integron_01	CALIN	2	2	GCF_002751605.1
1744	KLPN.1018.01635.0013	integron_01	CALIN	2	1	GCF_001718115.1
1745	KLPN.1018.01635.0027	integron_01	complete	3	6	GCF_001718115.1
1746	KLPN.1018.01636.0012	integron_01	CALIN	2	2	GCF_900510765.1
1747	KLPN.1018.01637.0044	integron_01	complete	5	13	GCF_900493305.1
1748	KLPN.1018.01638.0017	integron_01	complete	1	4	GCF_000982045.1
1749	KLPN.1018.01638.0022	integron_01	complete	2	3	GCF_000982045.1
1750	KLPN.1018.01638.0031	integron_01	In0		1	GCF_000982045.1
1751	KLPN.1018.01638.0036	integron_01	CALIN	2	1	GCF_000982045.1
1752	KLPN.1018.01638.0039	integron_01	In0		1	GCF_000982045.1
1753	KLPN.1018.01638.0040	integron_01	CALIN	2	3	GCF_000982045.1
1754	KLPN.1018.01640.0015	integron_01	complete	3	4	GCF_900513835.1
1755	KLPN.1018.01640.0068	integron_01	CALIN	2	2	GCF_900513835.1
1756	KLPN.1018.01641.0029	integron_01	complete	1	1	GCF_002186465.1
1757	KLPN.1018.01641.0047	integron_01	CALIN	2	3	GCF_002186465.1
1758	KLPN.1018.01647.0049	integron_01	complete	1	1	GCF_900511445.1
1759	KLPN.1018.01647.0057	integron_01	CALIN	2	2	GCF_900511445.1
1760	KLPN.1018.01648.0013	integron_01	CALIN	2	2	GCF_900509955.1
1761	KLPN.1018.01648.0021	integron_01	CALIN	3	2	GCF_900509955.1
1762	KLPN.1018.01649.0024	integron_01	CALIN	5	4	GCF_002853735.1
1763	KLPN.1018.01650.0008	integron_01	CALIN	2	1	GCF_900510165.1
1764	KLPN.1018.01650.0022	integron_01	CALIN	3	2	GCF_900510165.1
1765	KLPN.1018.01650.0026	integron_01	complete	1	2	GCF_900510165.1
1766	KLPN.1018.01651.0012	integron_01	CALIN	2	3	GCF_900512835.1
1767	KLPN.1018.01651.0058	integron_01	CALIN	2	1	GCF_900512835.1
1768	KLPN.1018.01652.0047	integron_01	complete	1	1	GCF_002751645.1
1769	KLPN.1018.01652.0057	integron_01	CALIN	2	3	GCF_002751645.1
1770	KLPN.1018.01653.0014	integron_01	In0		1	GCF_900510415.1
1771	KLPN.1018.01653.0016	integron_01	CALIN	3	2	GCF_900510415.1
1772	KLPN.1018.01653.0056	integron_01	CALIN	5	4	GCF_900510415.1
1773	KLPN.1018.01654.0015	integron_01	In0		1	GCF_900513105.1
1774	KLPN.1018.01655.0018	integron_01	CALIN	2	3	GCF_900493435.1
1775	KLPN.1018.01655.0061	integron_01	complete	1	1	GCF_900493435.1
1776	KLPN.1018.01656.0039	integron_01	CALIN	3	3	GCF_002188185.1
1777	KLPN.1018.01656.0050	integron_01	CALIN	2	2	GCF_002188185.1
1778	KLPN.1018.01656.0063	integron_01	In0		1	GCF_002188185.1
1779	KLPN.1018.01657.0024	integron_01	In0		1	GCF_900513875.1
1780	KLPN.1018.01657.0026	integron_01	CALIN	4	5	GCF_900513875.1
1781	KLPN.1018.01658.0020	integron_01	CALIN	2	2	GCF_900514075.1
1782	KLPN.1018.01658.0074	integron_01	complete	1	3	GCF_900514075.1
1783	KLPN.1018.01659.0040	integron_01	CALIN	2	3	GCF_002187295.1
1784	KLPN.1018.01660.0012	integron_01	CALIN	2	3	GCF_900516295.1
1785	KLPN.1018.01660.0070	integron_01	complete	1	2	GCF_900516295.1
1786	KLPN.1018.01661.0016	integron_01	CALIN	2	3	GCF_900517025.1
1787	KLPN.1018.01661.0067	integron_01	complete	1	1	GCF_900517025.1
1788	KLPN.1018.01662.0020	integron_01	complete	2	1	GCF_900511495.1
1789	KLPN.1018.01663.0053	integron_01	complete	1	3	GCF_002187805.1
1790	KLPN.1018.01664.0054	integron_01	CALIN	2	1	GCF_900501265.1
1791	KLPN.1018.01664.0055	integron_01	complete	2	1	GCF_900501265.1
1792	KLPN.1018.01665.0076	integron_01	complete	1	3	GCF_900504535.1
1793	KLPN.1018.01666.0061	integron_01	complete	2	1	GCF_900503805.1
1794	KLPN.1018.01667.0073	integron_01	complete	1	1	GCF_900504275.1
1795	KLPN.1018.01667.0076	integron_01	CALIN	2	2	GCF_900504275.1
1796	KLPN.1018.01668.0057	integron_01	complete	3	4	GCF_900506175.1
1797	KLPN.1018.01670.0064	integron_01	complete	1	1	GCF_900512255.1
1798	KLPN.1018.01670.0078	integron_01	CALIN	2	3	GCF_900512255.1
1799	KLPN.1018.01671.0056	integron_01	complete	3	4	GCF_900516465.1
1800	KLPN.1018.01672.0040	integron_01	complete	3	4	GCF_001939845.1
1801	KLPN.1018.01673.0023	integron_01	CALIN	3	2	GCF_900511345.1
1802	KLPN.1018.01673.0071	integron_01	CALIN	4	5	GCF_900511345.1
1803	KLPN.1018.01675.0018	integron_01	CALIN	2	2	GCF_900513455.1
1804	KLPN.1018.01675.0053	integron_01	complete	1	2	GCF_900513455.1
1805	KLPN.1018.01676.0037	integron_01	complete	1	1	GCF_900515575.1
1806	KLPN.1018.01676.0070	integron_01	CALIN	2	3	GCF_900515575.1
1807	KLPN.1018.01679.0062	integron_01	CALIN	3	2	GCF_003063185.1
1808	KLPN.1018.01679.0073	integron_01	In0		1	GCF_003063185.1
1809	KLPN.1018.01680.0082	integron_01	complete	1	1	GCF_900511775.1
1810	KLPN.1018.01680.0086	integron_01	CALIN	2	2	GCF_900511775.1
1811	KLPN.1018.01681.0025	integron_01	complete	1	1	GCF_003012855.1
1812	KLPN.1018.01682.0022	integron_01	complete	2	3	GCF_002852065.1
1813	KLPN.1018.01682.0023	integron_01	CALIN	2	1	GCF_002852065.1
1814	KLPN.1018.01682.0024	integron_01	CALIN	2	3	GCF_002852065.1
1815	KLPN.1018.01682.0032	integron_01	CALIN	2	2	GCF_002852065.1
1816	KLPN.1018.01682.0048	integron_01	CALIN	2	1	GCF_002852065.1
1817	KLPN.1018.01683.0028	integron_01	CALIN	3	2	GCF_000821365.1
1818	KLPN.1018.01683.0041	integron_01	In0		1	GCF_000821365.1
1819	KLPN.1018.01683.0079	integron_01	CALIN	2	1	GCF_000821365.1
1820	KLPN.1018.01684.0036	integron_01	CALIN	2	2	GCF_900506985.1
1821	KLPN.1018.01684.0085	integron_01	complete	1	2	GCF_900506985.1
1822	KLPN.1018.01685.0036	integron_01	complete	2	4	GCF_900507055.1
1823	KLPN.1018.01685.0044	integron_01	CALIN	2	4	GCF_900507055.1
1824	KLPN.1018.01685.0070	integron_01	CALIN	2	1	GCF_900507055.1
1825	KLPN.1018.01687.0018	integron_01	CALIN	4	10	GCF_002775295.1
1826	KLPN.1018.01687.0025	integron_01	complete	1	2	GCF_002775295.1
1827	KLPN.1018.01688.0031	integron_01	CALIN	2	3	GCF_003571035.1
1828	KLPN.1018.01689.0080	integron_01	CALIN	2	3	GCF_900502065.1
1829	KLPN.1018.01689.0084	integron_01	complete	1	2	GCF_900502065.1
1830	KLPN.1018.01690.0029	integron_01	CALIN	2	1	GCF_900506315.1
1831	KLPN.1018.01690.0031	integron_01	CALIN	2	2	GCF_900506315.1
1832	KLPN.1018.01692.0035	integron_01	complete	1	2	GCF_002775265.1
1833	KLPN.1018.01692.0046	integron_01	CALIN	2	3	GCF_002775265.1
1834	KLPN.1018.01693.0027	integron_01	CALIN	2	2	GCF_900509095.1
1835	KLPN.1018.01693.0083	integron_01	complete	1	2	GCF_900509095.1
1836	KLPN.1018.01694.0032	integron_01	CALIN	2	2	GCF_900516685.1
1837	KLPN.1018.01694.0038	integron_01	In0		1	GCF_900516685.1
1838	KLPN.1018.01695.0082	integron_01	In0		1	GCF_900502265.1
1839	KLPN.1018.01698.0020	integron_01	CALIN	2	1	GCF_900505685.1
1840	KLPN.1018.01698.0057	integron_01	CALIN	3	1	GCF_900505685.1
1841	KLPN.1018.01699.0051	integron_01	complete	1	1	GCF_900510505.1
1842	KLPN.1018.01699.0083	integron_01	CALIN	2	3	GCF_900510505.1
1843	KLPN.1018.01700.0053	integron_01	CALIN	2	1	GCF_001699045.1
1844	KLPN.1018.01701.0055	integron_01	complete	1	2	GCF_900501035.1
1845	KLPN.1018.01701.0080	integron_01	CALIN	2	3	GCF_900501035.1
1846	KLPN.1018.01702.0063	integron_01	CALIN	4	3	GCF_900508505.1
1847	KLPN.1018.01702.0067	integron_01	In0		1	GCF_900508505.1
1848	KLPN.1018.01702.0070	integron_01	CALIN	3	2	GCF_900508505.1
1849	KLPN.1018.01703.0004	integron_01	complete	1	1	GCF_900501965.1
1850	KLPN.1018.01703.0054	integron_01	CALIN	2	2	GCF_900501965.1
1851	KLPN.1018.01705.0088	integron_01	CALIN	2	3	GCF_900516615.1
1852	KLPN.1018.01707.0018	integron_01	CALIN	2	3	GCF_001720875.1
1853	KLPN.1018.01707.0040	integron_01	complete	1	1	GCF_001720875.1
1854	KLPN.1018.01707.0053	integron_01	CALIN	2	3	GCF_001720875.1
1855	KLPN.1018.01708.0035	integron_01	CALIN	2	4	GCF_003036645.1
1856	KLPN.1018.01710.0035	integron_01	CALIN	3	3	GCF_900516635.1
1857	KLPN.1018.01710.0075	integron_01	CALIN	5	3	GCF_900516635.1
1858	KLPN.1018.01711.0055	integron_01	complete	1	3	GCF_900506095.1
1859	KLPN.1018.01712.0029	integron_01	complete	2	3	GCF_900494175.1
1860	KLPN.1018.01713.0012	integron_01	CALIN	3	3	GCF_900501645.1
1861	KLPN.1018.01713.0036	integron_01	CALIN	2	4	GCF_900501645.1
1862	KLPN.1018.01713.0044	integron_01	CALIN	2	1	GCF_900501645.1
1863	KLPN.1018.01713.0055	integron_01	CALIN	2	2	GCF_900501645.1
1864	KLPN.1018.01713.0081	integron_01	In0		1	GCF_900501645.1
1865	KLPN.1018.01714.0037	integron_01	CALIN	4	3	GCF_900509005.1
1866	KLPN.1018.01714.0082	integron_01	CALIN	2	2	GCF_900509005.1
1867	KLPN.1018.01714.0086	integron_01	CALIN	3	1	GCF_900509005.1
1868	KLPN.1018.01716.0026	integron_01	CALIN	2	2	GCF_003065045.1
1869	KLPN.1018.01717.0012	integron_01	complete	1	1	GCF_900500805.1
1870	KLPN.1018.01717.0075	integron_01	CALIN	2	2	GCF_900500805.1
1871	KLPN.1018.01718.0080	integron_01	CALIN	2	2	GCF_001720705.1
1872	KLPN.1018.01718.0094	integron_01	In0		1	GCF_001720705.1
1873	KLPN.1018.01720.0026	integron_01	complete	1	1	GCF_900503195.1
1874	KLPN.1018.01720.0071	integron_01	CALIN	2	2	GCF_900503195.1
1875	KLPN.1018.01722.0063	integron_01	complete	1	3	GCF_002934725.1
1876	KLPN.1018.01723.0092	integron_01	CALIN	2	2	GCF_900503785.1
1877	KLPN.1018.01723.0093	integron_01	complete	1	2	GCF_900503785.1
1878	KLPN.1018.01728.0042	integron_01	complete	5	7	GCF_900507745.1
1879	KLPN.1018.01729.0038	integron_01	CALIN	2	3	GCF_900407035.1
1880	KLPN.1018.01729.0087	integron_01	complete	1	1	GCF_900407035.1
1881	KLPN.1018.01732.0117	integron_01	complete	2	4	GCF_900504865.1
1882	KLPN.1018.01733.0032	integron_01	CALIN	2	2	GCF_900172165.1
1883	KLPN.1018.01733.0149	integron_01	complete	1	1	GCF_900172165.1
1884	KLPN.1018.01734.0177	integron_01	complete	1	2	GCF_900514315.1
1885	KLPN.1018.01735.0185	integron_01	CALIN	2	1	GCF_900172615.1
1886	KLPN.1018.01739.0210	integron_01	CALIN	2	1	GCF_900172585.1
1887	KLPN.1018.01740.0041	integron_01	complete	2	1	GCF_900500735.1
1888	KLPN.1018.01740.0199	integron_01	CALIN	2	1	GCF_900500735.1
1889	KLPN.1018.01741.0094	integron_01	complete	1	2	GCF_900506845.1
1890	KLPN.1018.01742.0043	integron_01	CALIN	2	1	GCF_900173945.1
1891	KLPN.1018.01743.0014	integron_01	CALIN	2	2	GCF_003037935.1
1892	KLPN.1018.01743.0029	integron_01	CALIN	2	1	GCF_003037935.1
1893	KLPN.1018.01743.0039	integron_01	In0		1	GCF_003037935.1
1894	KLPN.1018.01743.0234	integron_01	CALIN	3	3	GCF_003037935.1
1895	KLPN.1018.01744.0065	integron_01	complete	1	2	GCF_900515615.1
1896	KLPN.1018.01744.0107	integron_01	CALIN	2	2	GCF_900515615.1
1897	KLPN.1018.01748.0236	integron_01	CALIN	4	11	GCF_900503515.1
1898	KLPN.1018.01748.0303	integron_01	complete	1	2	GCF_900503515.1
1899	KLPN.1018.01748.0449	integron_01	CALIN	2	1	GCF_900503515.1
1900	KLPN.1018.01748.0549	integron_01	CALIN	2	2	GCF_900503515.1
1901	KLPN.1018.01752.0040	integron_01	complete	1	4	GCF_000826605.1
1902	KLPN.1018.01752.0041	integron_01	CALIN	4	9	GCF_000826605.1
1903	KLPN.1018.01755.0019	integron_01	In0		1	GCF_001033585.1
1904	KLPN.1018.01755.0040	integron_01	CALIN	3	4	GCF_001033585.1
1905	KLPN.1018.01756.0045	integron_01	complete	3	6	GCF_900492785.1
1906	KLPN.1018.01757.0007	integron_01	complete	4	10	GCF_900084515.1
1907	KLPN.1018.01760.0017	integron_01	complete	1	1	GCF_003346605.1
1908	KLPN.1018.01760.0047	integron_01	CALIN	2	2	GCF_003346605.1
1909	KLPN.1018.01761.0057	integron_01	complete	2	3	GCF_000492775.1
1910	KLPN.1018.01762.0005	integron_01	CALIN	2	3	GCF_002300775.1
1911	KLPN.1018.01765.0010	integron_01	CALIN	2	2	GCF_900506365.1
1912	KLPN.1018.01765.0063	integron_01	complete	2	3	GCF_900506365.1
1913	KLPN.1018.01767.0019	integron_01	CALIN	2	2	GCF_900517115.1
1914	KLPN.1018.01768.0032	integron_01	complete	1	1	GCF_002187785.1
1915	KLPN.1018.01768.0049	integron_01	CALIN	2	2	GCF_002187785.1
1916	KLPN.1018.01769.0016	integron_01	CALIN	2	2	GCF_900512335.1
1917	KLPN.1018.01769.0066	integron_01	complete	1	2	GCF_900512335.1
1918	KLPN.1018.01770.0058	integron_01	complete	4	7	GCF_900092985.1
1919	KLPN.1018.01771.0033	integron_01	complete	1	2	GCF_900501545.1
1920	KLPN.1018.01772.0029	integron_01	complete	3	4	GCF_900506395.1
1921	KLPN.1018.01773.0020	integron_01	complete	1	3	GCF_002186865.1
1922	KLPN.1018.01774.0027	integron_01	complete	1	3	GCF_002187835.1
1923	KLPN.1018.01775.0011	integron_01	CALIN	2	1	GCF_900513735.1
1924	KLPN.1018.01776.0019	integron_01	CALIN	2	2	GCF_900513485.1
1925	KLPN.1018.01776.0024	integron_01	complete	3	4	GCF_900513485.1
1926	KLPN.1018.01777.0011	integron_01	CALIN	2	1	GCF_900173465.1
1927	KLPN.1018.01778.0023	integron_01	CALIN	2	2	GCF_900503335.1
1928	KLPN.1018.01778.0054	integron_01	complete	2	4	GCF_900503335.1
1929	KLPN.1018.01779.0073	integron_01	CALIN	2	2	GCF_900504365.1
1930	KLPN.1018.01780.0014	integron_01	CALIN	3	1	GCF_900510525.1
1931	KLPN.1018.01780.0041	integron_01	CALIN	2	1	GCF_900510525.1
1932	KLPN.1018.01781.0033	integron_01	complete	3	4	GCF_900506375.1
1933	KLPN.1018.01781.0035	integron_01	CALIN	2	3	GCF_900506375.1
1934	KLPN.1018.01782.0029	integron_01	complete	1	1	GCF_003195735.1
1935	KLPN.1018.01782.0038	integron_01	CALIN	2	2	GCF_003195735.1
1936	KLPN.1018.01784.0026	integron_01	complete	3	4	GCF_900494635.1
1937	KLPN.1018.01784.0036	integron_01	CALIN	2	3	GCF_900494635.1
1938	KLPN.1018.01784.0046	integron_01	CALIN	2	2	GCF_900494635.1
1939	KLPN.1018.01785.0050	integron_01	CALIN	3	2	GCF_003062545.1
1940	KLPN.1018.01785.0061	integron_01	In0		1	GCF_003062545.1
1941	KLPN.1018.01787.0013	integron_01	CALIN	2	2	GCF_900510205.1
1942	KLPN.1018.01787.0067	integron_01	CALIN	3	6	GCF_900510205.1
1943	KLPN.1018.01787.0072	integron_01	complete	1	1	GCF_900510205.1
1944	KLPN.1018.01788.0040	integron_01	complete	1	3	GCF_900512615.1
1945	KLPN.1018.01789.0011	integron_01	In0		1	GCF_900507755.1
1946	KLPN.1018.01789.0056	integron_01	CALIN	2	3	GCF_900507755.1
1947	KLPN.1018.01790.0047	integron_01	CALIN	2	2	GCF_003382185.1
1948	KLPN.1018.01790.0057	integron_01	In0		1	GCF_003382185.1
1949	KLPN.1018.01792.0038	integron_01	CALIN	2	1	GCF_001701625.1
1950	KLPN.1018.01793.0060	integron_01	CALIN	2	1	GCF_003034385.1
1951	KLPN.1018.01794.0041	integron_01	CALIN	2	2	GCF_900514705.1
1952	KLPN.1018.01794.0080	integron_01	complete	1	2	GCF_900514705.1
1953	KLPN.1018.01795.0054	integron_01	CALIN	2	1	GCF_900505155.1
1954	KLPN.1018.01798.0020	integron_01	CALIN	2	2	GCF_900503115.1
1955	KLPN.1018.01798.0053	integron_01	In0		1	GCF_900503115.1
1956	KLPN.1018.01799.0009	integron_01	CALIN	2	1	GCF_900516545.1
1957	KLPN.1018.01799.0020	integron_01	CALIN	2	2	GCF_900516545.1
1958	KLPN.1018.01799.0044	integron_01	In0		1	GCF_900516545.1
1959	KLPN.1018.01799.0084	integron_01	CALIN	4	4	GCF_900516545.1
1960	KLPN.1018.01800.0022	integron_01	CALIN	3	2	GCF_900507625.1
1961	KLPN.1018.01800.0023	integron_01	CALIN	2	3	GCF_900507625.1
1962	KLPN.1018.01800.0061	integron_01	CALIN	2	2	GCF_900507625.1
1963	KLPN.1018.01800.0064	integron_01	In0		1	GCF_900507625.1
1964	KLPN.1018.01800.0069	integron_01	CALIN	4	4	GCF_900507625.1
1965	KLPN.1018.01801.0035	integron_01	CALIN	2	1	GCF_000785625.1
1966	KLPN.1018.01802.0064	integron_01	complete	2	1	GCF_900510265.1
1967	KLPN.1018.01803.0066	integron_01	complete	1	1	GCF_900502875.1
1968	KLPN.1018.01803.0068	integron_01	CALIN	2	2	GCF_900502875.1
1969	KLPN.1018.01805.0074	integron_01	complete	1	2	GCF_900512605.1
1970	KLPN.1018.01806.0015	integron_01	complete	1	1	GCF_001463215.1
1971	KLPN.1018.01806.0082	integron_01	CALIN	2	2	GCF_001463215.1
1972	KLPN.1018.01808.0035	integron_01	CALIN	3	4	GCF_002248635.1
1973	KLPN.1018.01808.0058	integron_01	CALIN	3	4	GCF_002248635.1
1974	KLPN.1018.01808.0072	integron_01	In0		1	GCF_002248635.1
1975	KLPN.1018.01809.0060	integron_01	complete	1	1	GCF_002895645.1
1976	KLPN.1018.01809.0081	integron_01	CALIN	2	3	GCF_002895645.1
1977	KLPN.1018.01810.0023	integron_01	CALIN	2	2	GCF_900510485.1
1978	KLPN.1018.01810.0063	integron_01	complete	1	1	GCF_900510485.1
1979	KLPN.1018.01811.0056	integron_01	CALIN	2	2	GCF_900510355.1
1980	KLPN.1018.01811.0087	integron_01	complete	1	1	GCF_900510355.1
1981	KLPN.1018.01812.0016	integron_01	CALIN	2	2	GCF_900517545.1
1982	KLPN.1018.01812.0075	integron_01	CALIN	3	5	GCF_900517545.1
1983	KLPN.1018.01812.0079	integron_01	complete	1	2	GCF_900517545.1
1984	KLPN.1018.01813.0087	integron_01	complete	5	9	GCF_900093185.1
1985	KLPN.1018.01814.0063	integron_01	complete	3	6	GCF_900494585.1
1986	KLPN.1018.01816.0024	integron_01	CALIN	4	11	GCF_900504445.1
1987	KLPN.1018.01817.0086	integron_01	CALIN	3	4	GCF_900180825.1
1988	KLPN.1018.01817.0092	integron_01	complete	1	1	GCF_900180825.1
1989	KLPN.1018.01819.0007	integron_01	complete	1	2	GCF_900511565.1
1990	KLPN.1018.01819.0056	integron_01	CALIN	2	3	GCF_900511565.1
1991	KLPN.1018.01820.0007	integron_01	CALIN	2		GCF_900503695.1
1992	KLPN.1018.01820.0075	integron_01	CALIN	2	2	GCF_900503695.1
1993	KLPN.1018.01822.0042	integron_01	complete	2	1	GCF_900500745.1
1994	KLPN.1018.01822.0075	integron_01	CALIN	2	1	GCF_900500745.1
1995	KLPN.1018.01823.0042	integron_01	CALIN	2	2	GCF_900516825.1
1996	KLPN.1018.01823.0082	integron_01	CALIN	2	2	GCF_900516825.1
1997	KLPN.1018.01824.0023	integron_01	CALIN	3	3	GCF_900516605.1
1998	KLPN.1018.01824.0066	integron_01	CALIN	2	3	GCF_900516605.1
[truncated: 2,851 more rows]
